# Supplementary material for: Genetic analysis of water loss of excised leaves associated with drought tolerance in wheat
Source: PeerJ. 2018 Jul 6;6:e5063. doi: 10.7717/peerj.5063 (PMC6037134; doi:10.7717/peerj.5063)
Supplement: Supplemental Information 2 [file peerj-06-5063-s008.xls]

## Sheet: Ranked ELWL+leaf area+length
		Ranked mn 07-09		Mean 2007		Mean08		Mean 2009				Mean 07-09		Mean 0-3h 2007		Mean 0-3h 08		Mean 0-3h 2009				Mean 07-09		Mean 2007		Mean08		Mean 2009				Mean 07-09		Mean 2007		Mean08		Mean 2009				Mean 07-09		Mean 2007		Mean 2008		Mean 2009
CSDH	CSDH	ELWLW 0-3h	CSDH	ELWLW 0-3h	CSDH	ELWLW 0-3h	CSDH	ELWLW 0-3h		CSDH	CSDH	ELWLA 0-3h	CSDH	ELWLA 0-3h	CSDH	ELWLA 0-3h	CSDH	ELWLA 0-3h		CSDH	CSDH	length	CSDH	length	CSDH	length	CSDH	length		CSDH	CSDH	leaf area	CSDH	leaf area	CSDH	leaf area	CSDH	leaf area		CSDH	CSDH	FW after 0h	CSDH	FW after 0h	CSDH	FW after 0h	CSDH	FW after 0h
1	54	44.5417	7	35.4716	43	41.9482	61	36.8885		1	7	2.64147	1	2.38338	26	2.62677	16	2.13675		1	98	40.0111	115	39.5	98	42.3667	98	40.7667		1	71	23.145	28	18.9525	71	25.29	71	25.3525		1	71	0.459333	143	0.344	71	0.514667	61	0.555
2	7	45.6532	4	36.4655	53	44.1593	98	36.9741		2	9	2.68005	2	2.29476	31	2.81269	20	2.36947		2	115	38.5889	26	37.6667	26	37.2	25	39.3667		2	63	20.2608	71	18.7925	53	23.525	143	24.1612		2	143	0.450889	28	0.343	25	0.510667	143	0.553
3	53	45.7124	26	40.1676	31	44.6414	41	37.0569		3	23	2.63928	4	2.1973	43	2.51564	23	2.27842		3	25	37.2	25	37.2333	115	37.0333	115	39.2333		3	20	19.9417	5	16.905	98	23.3575	61	23.8375		3	98	0.411	71	0.338	30	0.488333	71	0.525333
4	26	47.2056	5	41.4806	49	45.3764	54	37.179		4	26	2.6878	5	2.01421	49	3.08236	37	2.25427		4	26	37.1778	98	36.9	25	35	71	38.9667		4	143	19.7763	115	16.7725	25	22.9375	97	23.8275		4	25	0.410222	115	0.326	98	0.487	54	0.503667
5	61	47.4233	9	42.7908	71	45.7956	52	39.4063		5	43	2.70902	7	1.73458	53	2.38002	43	1.99043		5	71	35.1333	28	36.1	71	33.7667	2	38.7		5	115	19.3067	59	16.77	20	22.8625	52	23.1375		5	115	0.401667	59	0.323333	63	0.468667	59	0.474
7	56	47.8263	12	43.5729	30	48.7029	16	39.4781		7	52	2.74533	8	2.21278	54	2.78842	44	2.35829		7	2	34.3333	27	35.5333	31	32.5333	143	37.8		7	98	19.1917	14	16.595	63	22.8125	59	22.2025		7	61	0.401333	25	0.312333	143	0.455667	12	0.468
8	2	48.7321	2	43.6133	54	49.1014	56	39.8417		8	53	2.5094	9	1.91212	64	3.02665	52	2.21343		8	28	33.8556	65	34.1	2	32.2333	58	37.6333		8	53	18.7583	27	15.99	26	22.4475	63	22.195		8	63	0.391667	61	0.308	53	0.444333	52	0.465667
9	1	48.7395	1	45.2603	48	50.1082	43	40.2307		9	54	2.7167	12	2.34999	71	2.69151	56	2.31871		9	143	33.7889	45	33.7333	94	31.9333	26	36.6667		9	54	18.6675	143	15.9275	30	20.66	146	22.1225		9	54	0.390778	65	0.308	20	0.437667	97	0.462333
10	46	48.8219	53	45.3704	99	50.2042	60	40.5471		10	62	2.78941	23	2.28521	99	2.71288	60	2.19166		10	45	33.5	59	33.5333	143	31.8333	45	36.2		10	28	18.6233	63	15.775	54	20.515	104	22.0075		10	31	0.382111	41	0.307333	115	0.435	98	0.459
11	9	49.503	10	45.9419	14	51.3834	143	40.6304		11	128	2.7455	62	2.34486	128	2.7729	62	2.33578		11	94	33.1333	14	33.0667	67	31.6667	94	35.9667		11	31	18.51	104	15.7325	115	20.485	20	21.755		11	59	0.379111	27	0.304333	144	0.425667	31	0.455
12	60	50.007	54	47.3448	45	51.8204	102	41.9745		12	56	2.81075	30	2.40716	46	3.25222	40	2.4282		12	31	33.0333	86	32.8	10	31.4667	31	35.8333		12	52	18.4483	31	15.36	144	20.22	54	21.6875		12	104	0.378556	14	0.296333	55	0.421667	104	0.447667
13	31	50.0621	3	47.3709	28	52.5179	1	43.2471		13	60	2.81199	26	2.44068	14	3.31801	98	2.43657		13	53	32.6667	71	32.6667	53	31.3667	56	35.8		13	25	18.2467	65	15.345	52	20.0825	5	21.335		13	28	0.365667	104	0.292667	10	0.421333	115	0.444
14	30	50.527	115	47.4357	56	52.6152	2	43.3004		14	2	2.83114	10	2.44346	28	3.33304	93	2.4754		14	59	32.5556	54	32.5333	55	31.2	59	35.5667		14	26	18	2	15.3025	55	19.56	56	20.84		14	20	0.365556	26	0.289	31	0.416	58	0.438667
15	41	50.6814	28	48.6319	124	52.9618	46	43.633		15	30	2.83714	69	2.45716	48	3.33581	61	2.47591		15	27	32.5333	13	32.3	65	31.2	53	35.5667		15	59	17.7842	20	15.2075	31	19.52	58	20.69		15	55	0.359111	98	0.287	32	0.409333	146	0.425
16	28	50.7045	25	48.7473	46	53.4853	19	43.8264		16	64	2.84567	53	2.46368	7	3.33839	9	2.4962		16	58	32.4	5	32.2	63	31.1667	52	35.3667		16	61	17.75	58	15.0475	99	19.4075	115	20.6625		16	53	0.355556	63	0.286667	54	0.406333	56	0.423333
17	24	50.9217	61	48.8367	64	53.7524	22	44.0474		17	8	2.86748	17	2.46538	23	3.3542	41	2.49693		17	10	31.6556	2	32.0667	144	31.1333	28	35.0667		17	146	17.5442	25	14.91	143	19.24	31	20.65		17	52	0.353444	5	0.278667	104	0.395333	114	0.42
18	71	51.1568	24	48.9528	59	55.3575	37	44.0616		18	46	2.87114	64	2.57276	30	3.3915	8	2.53886		18	55	31.5889	4	32	99	31	97	35		18	5	17.5242	61	14.6975	10	18.88	98	20.38		18	26	0.352667	31	0.275333	67	0.393333	63	0.419667
19	98	51.3167	8	49.047	42	55.8373	7	44.3055		19	1	2.88493	52	2.57311	60	3.39791	128	2.54164		19	99	31.3889	143	31.7333	45	30.5667	55	34.7		19	104	17.3608	12	14.36	27	18.4225	91	20.3225		19	58	0.347667	2	0.272667	52	0.385	5	0.418667
20	52	51.3483	46	49.3473	11	56.0044	26	44.5497		20	20	2.90187	28	2.59322	45	3.43278	35	2.569		20	144	31.2889	94	31.5	30	30.5333	51	34.45		20	10	17.1908	26	14.125	67	18.2375	28	20.1425		20	18	0.345444	12	0.266	11	0.379667	25	0.407667
21	62	52.0577	62	49.7755	128	56.1408	20	44.7227		21	28	2.92563	56	2.6218	52	3.44945	2	2.64693		21	14	31.2778	1	31.1	54	30.4333	61	34.1667		21	55	16.9483	53	14.0875	7	18.0825	10	19.6175		21	27	0.345222	18	0.264333	27	0.379667	26	0.403
22	12	52.4122	56	51.0219	91	56.2757	94	44.9843		22	71	2.93249	54	2.64759	56	3.49175	46	2.67689		22	63	31.1444	53	31.0667	28	30.4	67	34.0333		22	27	16.8958	90	13.8775	46	17.725	67	19.4825		22	12	0.344111	54	0.262333	18	0.375333	102	0.401667
23	143	52.6739	52	51.2492	61	56.5447	51	45.1612		23	48	2.9643	24	2.67329	146	3.4964	53	2.6845		23	65	31.1222	24	30.7667	7	29.7333	33	33.9		23	58	16.7942	98	13.8375	18	17.2075	60	19.3175		23	10	0.341222	20	0.261333	7	0.374667	55	0.401
24	25	52.8584	27	51.7679	26	56.8996	124	45.4534		24	49	2.98974	46	2.68432	24	3.50594	99	2.68726		24	54	31.0333	31	30.7333	12	29.5667	146	33.8667		24	18	16.6625	18	13.8	65	17.1775	128	19.2975		24	5	0.337889	58	0.260667	46	0.368	20	0.397667
25	45	52.9373	23	51.8328	60	56.9918	62	45.8271		25	31	2.99352	127	2.72195	98	3.50991	30	2.71276		25	67	30.8778	10	30.7333	20	29.5333	69	33.7		25	99	16.5942	54	13.8	57	17.0725	12	19.245		25	146	0.333222	45	0.259333	26	0.366	18	0.396667
26	49	53.0542	69	52.0285	104	56.9945	40	46.1687		26	44	3.00744	115	2.74313	70	3.52144	54	2.7141		26	33	30.8667	18	30.6667	33	29.5333	39	33.4667		26	144	16.4583	13	13.755	146	16.8	55	19.09		26	144	0.331667	86	0.259	102	0.365333	7	0.395
27	4	53.2407	19	52.1599	69	57.0096	24	46.3171		27	24	3.03118	48	2.8048	51	3.52236	91	2.71631		27	52	30.8111	144	30.6333	27	29.4667	16	33.2667		27	2	16.2758	146	13.71	28	16.775	114	19		27	102	0.331444	53	0.258333	28	0.365	28	0.389
28	48	53.4193	60	52.4821	98	57.0582	55	46.5174		28	16	3.10215	71	2.80684	20	3.52867	1	2.74173		28	146	30.7778	146	30.4667	58	29.3667	1	33.2		28	97	16.2458	128	13.515	127	16.76	18	18.98		28	114	0.330778	55	0.254667	56	0.364	41	0.386
29	64	53.5315	41	52.6628	47	57.1748	35	46.825		29	69	3.10706	20	2.80748	1	3.52969	48	2.7523		29	5	30.7556	58	30.2	69	29.0333	99	33		29	12	16.1217	45	13.4725	69	16.685	62	18.78		29	14	0.330556	114	0.249667	99	0.361	11	0.383667
30	59	54.1542	30	52.7654	33	57.1787	23	47.1226		30	61	3.12608	49	2.81023	69	3.53011	51	2.77129		30	1	30.7	12	30.1667	39	28.9333	18	32.9667		30	90	16.0367	41	13.325	8	16.615	72	18.7325		30	2	0.326444	4	0.245333	33	0.358	91	0.381333
31	23	54.4823	71	52.8604	7	57.1823	12	47.335		31	99	3.13273	92	2.83697	67	3.53231	143	2.77134		31	12	30.6111	29	30.1667	8	28.8667	96	32.9667		31	14	15.8633	124	13.225	11	16.3675	53	18.6625		31	11	0.326222	24	0.244667	91	0.357	21	0.380333
32	10	54.4862	17	52.9223	24	57.4952	9	47.4212		32	5	3.14872	60	2.84641	2	3.55171	10	2.78194		32	7	30.4889	99	30.1667	104	28.7	5	32.7667		32	91	15.7475	24	13.1175	21	16.3625	21	18.6375		32	41	0.324	146	0.243	69	0.356333	22	0.380333
33	5	54.5986	59	53.6005	143	57.605	66	47.5569		33	97	3.16103	27	2.87054	57	3.55232	88	2.78405		33	18	30.4222	104	29.9667	62	28.6	10	32.7667		33	128	15.715	10	13.075	56	16.2075	86	18.5775		33	56	0.321333	13	0.240667	65	0.354667	2	0.375
34	43	54.6789	29	54.5778	1	57.711	47	47.5574		34	45	3.16379	97	2.8887	29	3.59814	57	2.82909		34	104	30.4111	63	29.9333	52	28.5667	124	32.6333		34	56	15.6825	99	12.9025	24	16.1975	16	18.345		34	7	0.317333	10	0.24	58	0.343667	42	0.372
35	22	54.7012	20	55.4703	25	57.7705	99	47.5706		35	127	3.16429	3	2.89883	124	3.62935	45	2.83451		35	69	30.3778	11	29.9	59	28.5667	27	32.6		35	21	15.6717	4	12.8425	102	16.12	90	18.2625		35	32	0.316611	22	0.239	21	0.343333	47	0.372
36	20	54.8739	31	55.5889	67	57.9378	53	47.6075		36	146	3.16461	128	2.92197	9	3.63182	28	2.85063		36	86	30.3667	22	29.9	11	28.4667	22	32.5667		36	7	15.6317	102	12.81	2	16.11	11	18.0125		36	91	0.314556	34	0.236333	124	0.343333	39	0.370333
37	69	55.1225	45	56.1572	9	58.297	44	47.7249		37	35	3.16902	16	2.93649	44	3.65659	7	2.85145		37	56	30.1889	96	29.8	124	28.3667	104	32.5667		37	67	15.4983	34	12.505	33	16.0875	7	17.8		37	22	0.312778	99	0.228	14	0.343	124	0.369333
38	115	55.2659	86	56.3544	72	58.4724	50	48.0055		38	12	3.18093	31	2.95429	97	3.66279	55	2.85695		38	97	30.1778	114	29.4333	14	28.3333	14	32.4333		38	13	15.3017	1	12.5	90	15.97	45	17.685		38	124	0.312222	102	0.227333	39	0.342333	144	0.366333
39	14	55.5572	49	56.3715	44	58.5118	15	48.5675		39	98	3.1922	19	2.97233	47	3.66837	66	2.8604		39	61	30.1111	61	29.4333	46	28.3	21	32.4		39	46	15.3017	33	12.3875	62	15.77	13	17.6775		39	24	0.311889	124	0.224	61	0.341	53	0.364
40	19	55.6061	92	56.9306	96	59.1037	64	48.7239		40	10	3.21171	29	2.982	62	3.68759	124	2.88022		40	24	30.1	7	29.3667	24	28.1	7	32.3667		40	57	15.2417	86	12.345	14	15.5775	144	17.6675		40	33	0.311111	1	0.222	59	0.34	60	0.363333
41	92	55.806	50	57.4996	115	59.1351	92	48.9435		41	91	3.24811	59	2.99801	15	3.71057	24	2.91431		41	96	30.0556	34	29.3667	56	28.1	63	32.3333		41	11	15.1975	55	12.195	16	15.3525	39	17.57		41	46	0.310444	36	0.218333	24	0.339333	10	0.362333
42	124	56.487	127	58.06	2	59.2827	96	49.1283		42	66	3.26812	61	3.00863	27	3.71452	146	2.91451		42	16	30	19	29.3333	146	28	60	32.3		42	33	15.185	52	12.125	23	15.2775	99	17.4725		42	99	0.310444	33	0.215333	57	0.339	86	0.362333
43	11	56.5857	64	58.1183	62	60.5706	128	49.268		43	4	3.27199	66	3.01312	127	3.71464	97	2.9316		43	20	29.8667	33	29.1667	127	27.9333	64	32.3		43	69	15.1783	36	12.0175	91	15.23	57	17.435		43	97	0.308444	11	0.215333	2	0.331667	33	0.36
44	33	56.6033	48	58.1194	86	60.7983	57	49.3622		44	51	3.28313	90	3.03734	63	3.72304	64	2.93761		44	22	29.8111	20	28.9667	16	27.9	128	32.3		44	102	15.1067	21	12.015	39	15.19	26	17.4275		44	13	0.306778	105	0.212667	13	0.331667	57	0.354333
45	16	56.6164	97	58.23	146	60.8823	10	49.6283		45	92	3.29499	33	3.04582	33	3.73912	96	2.94226		45	11	29.7667	55	28.8667	1	27.8	12	32.1		45	124	15.0525	69	11.995	51	14.9675	70	17.4275		45	39	0.304778	19	0.212333	146	0.331667	128	0.353333
46	15	56.6519	22	58.4015	70	61.1345	114	49.7674		46	57	3.31733	21	3.07768	115	3.75657	72	2.9624		46	124	29.6222	16	28.8333	60	27.7333	144	32.1		46	24	15.0342	8	11.9775	47	14.95	2	17.415		46	21	0.304667	46	0.210667	90	0.329667	46	0.352667
47	91	56.7075	11	58.7217	92	61.544	31	49.9561		47	124	3.34654	87	3.07804	35	3.78312	92	2.96431		47	39	29.5222	23	28.7667	72	27.7333	17	31.8667		47	45	14.9708	105	11.8825	124	14.8925	17	17.255		47	30	0.302778	94	0.210333	42	0.328667	14	0.352333
48	35	57.183	146	58.7381	22	61.6547	39	50.075		48	14	3.36295	146	3.08291	42	3.78433	22	2.97726		48	114	29.4444	66	28.6	18	27.6333	57	31.7333		48	8	14.9633	39	11.8375	12	14.76	33	17.08		48	45	0.302111	52	0.209667	47	0.327333	27	0.351667
49	47	57.3847	33	59.0999	39	61.7515	30	50.1125		49	33	3.36615	25	3.08938	65	3.78799	26	2.99595		49	4	29.4222	52	28.5	43	27.6	114	31.6667		49	39	14.8658	114	11.765	61	14.715	124	17.04		49	57	0.301	57	0.209667	62	0.325	24	0.351667
50	146	57.7182	16	59.4675	15	61.8253	91	50.6317		50	47	3.38578	14	3.11526	11	3.79167	19	2.99904		50	64	29.3111	64	28.5	13	27.5667	46	31.6333		50	16	14.8367	91	11.69	58	14.645	40	16.905		50	86	0.300667	32	0.206	127	0.323667	13	0.348
51	8	57.7445	14	59.5433	65	61.8826	45	50.8344		51	59	3.39295	63	3.12821	91	3.80004	32	3.00712		51	29	29.1444	102	28.4667	86	27.4667	3	31.5333		51	30	14.8175	48	11.605	43	14.49	25	16.8925		51	69	0.297556	91	0.205333	114	0.322667	15	0.347333
52	27	57.9105	15	59.563	57	62.0492	28	50.9638		52	27	3.39613	35	3.15495	12	3.8148	36	3.02411		52	46	28.9889	69	28.4	96	27.4	32	31.45		52	114	14.79	66	11.525	13	14.4725	69	16.855		52	67	0.295111	90	0.205	94	0.321	16	0.347333
53	97	57.997	143	59.7862	41	62.3244	32	51.0462		53	63	3.40047	45	3.22408	4	3.81662	39	3.02782		53	57	28.9889	97	28.3	5	27.3	24	31.4333		53	65	14.5825	46	11.5025	59	14.38	23	16.705		53	42	0.294333	3	0.204667	22	0.319	69	0.342667
54	50	58.0809	63	59.8234	88	62.6633	36	51.6355		54	115	3.40821	91	3.22798	8	3.8508	5	3.03463		54	128	28.9	8	28.2667	32	27.3	29	31.3		54	127	14.5425	144	11.4875	104	14.3425	46	16.6775		54	65	0.291778	144	0.203	5	0.316333	72	0.342333
55	51	58.34	98	59.9177	114	62.7028	48	52.0304		55	15	3.41221	93	3.23825	25	3.89262	50	3.04632		55	8	28.8444	57	27.9667	48	27.3	43	31.2333		55	23	14.4892	23	11.485	5	14.3325	32	16.5113		55	90	0.291111	50	0.202667	16	0.316333	99	0.342333
56	99	58.5619	65	60.2098	35	62.8173	25	52.0573		56	87	3.41848	13	3.25562	59	3.89296	34	3.04745		56	32	28.8389	3	27.9333	128	27.3	66	31.2333		56	62	14.4483	17	11.435	128	14.3325	41	16.495		56	94	0.286222	39	0.201667	8	0.314	45	0.34
57	57	58.9532	35	61.9067	29	62.8238	97	52.4395		57	40	3.47132	72	3.26868	61	3.89371	127	3.05629		57	102	28.8	124	27.8667	57	27.2667	62	31.2		57	86	14.4275	64	11.3775	97	14.2975	47	16.4925		57	16	0.283556	29	0.194667	45	0.307	90	0.338667
58	96	59.315	91	63.2152	27	62.8636	93	53.291		58	88	3.47205	11	3.30088	66	3.93085	47	3.05731		58	13	28.7667	32	27.7667	97	27.2333	72	31.1667		58	60	14.0167	22	11.24	105	14.2275	43	16.3975		58	1	0.271444	69	0.193667	105	0.301333	32	0.3345
59	128	59.5743	13	63.3138	55	62.881	5	53.3113		59	29	3.47486	15	3.32675	87	3.97561	49	3.07662		59	19	28.4556	36	27.5333	114	27.2333	20	31.1		59	32	13.7487	57	11.2175	42	14.0675	102	16.39		59	127	0.270889	17	0.193	12	0.298333	67	0.334
60	66	60.1108	57	65.4482	63	63.1549	59	53.5045		60	96	3.47702	80	3.33287	55	3.99904	114	3.11414		60	21	28.4444	91	27.5333	88	27.1667	102	31.0667		60	22	13.6775	11	11.2125	60	13.8925	22	16.31		60	60	0.270333	96	0.192	43	0.297333	62	0.330667
61	94	60.4681	87	65.9032	58	63.2233	33	53.5314		61	11	3.499	94	3.36146	96	4.00314	102	3.11453		61	60	28.4444	50	27.3333	64	27.1333	11	30.9333		61	43	13.4283	96	11.175	45	13.755	8	16.2975		61	19	0.269333	49	0.190667	48	0.295	94	0.327333
62	55	60.7798	72	66.0198	97	63.3214	146	53.5341		62	70	3.50841	70	3.38215	80	4.01169	94	3.12194		62	51	28.3944	48	27.3	4	27.1	86	30.8333		62	105	13.3392	32	11.0475	32	13.6875	27	16.275		62	47	0.268556	21	0.190333	51	0.289	70	0.327
63	39	60.8314	18	66.1187	52	63.3894	34	54.5896		63	67	3.51353	58	3.40661	86	4.01672	105	3.1514		63	62	28.2889	128	27.1	105	27.1	92	30.4333		63	1	13.2633	94	11.03	94	13.62	127	16.0175		63	96	0.266778	15	0.19	88	0.285333	66	0.325333
64	127	60.8773	51	66.4319	51	63.4268	71	54.8142		64	72	3.52819	47	3.43167	39	4.03038	67	3.1982		64	3	28.2444	46	27.0333	35	27	127	30.3		64	40	13.05	7	11.0125	114	13.605	44	15.99		64	62	0.264667	48	0.188	60	0.284667	96	0.324
65	29	61.0333	21	66.6311	94	63.6867	11	55.031		65	39	3.53343	40	3.46867	90	4.04536	15	3.19931		65	66	28.1778	17	26.9333	22	26.9667	19	30.2667		65	96	13.0383	19	11	64	13.595	24	15.7875		65	4	0.262778	16	0.187	72	0.284667	19	0.322
66	72	61.0409	58	66.824	93	63.8426	21	55.2536		66	90	3.53977	88	3.47482	38	4.05309	87	3.2018		66	30	28.0222	67	26.9333	80	26.9333	70	30.2667		66	66	12.9758	127	10.85	4	13.545	29	15.6825		66	36	0.262333	128	0.187	96	0.284333	50	0.321333
67	86	61.5999	47	67.422	34	63.9674	8	55.4823		67	25	3.54181	96	3.48565	105	4.05635	31	3.21359		67	43	27.8889	21	26.7	102	26.8667	54	30.1333		67	4	12.9575	16	10.8125	22	13.4825	66	15.6325		67	128	0.260111	8	0.186333	97	0.284333	92	0.317667
69	65	61.673	66	68.3937	66	64.3818	127	55.6785		69	17	3.56034	86	3.49816	143	4.07762	21	3.23315		69	35	27.8778	56	26.6667	61	26.7333	30	30.0333		69	17	12.93	40	10.7375	1	13.17	80	15.63		69	8	0.259222	42	0.182333	86	0.280667	40	0.317333
70	63	62.1428	36	68.4724	20	64.4288	14	55.745		70	19	3.56177	124	3.53004	92	4.08369	13	3.23732		70	72	27.8444	35	26.6	23	26.6333	35	30.0333		70	48	12.9058	49	10.7	48	12.97	96	15.61		70	72	0.258444	7	0.182333	1	0.279667	29	0.316333
71	36	62.3796	34	68.9668	23	64.4915	69	56.3294		71	143	3.57274	39	3.5421	88	4.15728	59	3.28788		71	127	27.8333	15	26.5333	91	26.5	80	29.7667		71	64	12.8883	97	10.6125	35	12.805	14	15.4175		71	15	0.255667	66	0.181333	41	0.278667	127	0.313667
72	34	62.5079	90	69.2266	4	66.0547	13	56.7094		72	37	3.60551	51	3.55573	18	4.19559	71	3.29913		72	23	27.7222	41	26.4667	90	26.4333	15	29.7		72	72	12.8792	29	10.5925	70	12.6875	92	15.245		72	105	0.255556	40	0.181	36	0.276667	1	0.312667
80	3	62.5146	96	69.7131	105	66.1195	4	57.2018		80	65	3.61261	57	3.57058	34	4.21998	33	3.3135		80	48	27.6111	90	26.4333	21	26.2333	50	29.5667		80	29	12.8792	88	10.0525	44	12.4275	35	15.0775		80	50	0.254667	97	0.178667	23	0.274667	3	0.311
86	58	62.8771	39	70.6677	90	66.2183	49	57.4148		86	94	3.63073	50	3.58045	16	4.2332	69	3.33392		86	17	27.4889	105	26.3	44	26.1	8	29.4		86	51	12.8367	9	10.0125	29	12.3625	30	14.98		86	34	0.253333	35	0.176667	19	0.273667	51	0.301
87	114	63.2942	124	71.0458	12	66.3289	58	58.5839		87	93	3.63934	38	3.60775	22	4.27106	63	3.35015		87	80	27.3778	39	26.1667	92	26.0333	4	29.1667		87	41	12.8117	56	10	86	12.36	15	14.935		87	66	0.252667	56	0.176667	4	0.270667	64	0.296667
88	40	63.5286	40	71.2455	18	66.4344	72	58.6306		88	22	3.64517	43	3.62098	58	4.34784	12	3.37799		88	90	27.3444	37	25.8667	29	25.9667	90	29.1667		88	94	12.7125	35	9.975	96	12.33	50	14.7625		88	51	0.252556	23	0.176	35	0.268333	35	0.293667
90	18	63.8282	70	71.5782	80	66.9948	18	58.9316		90	34	3.69778	65	3.62279	72	4.3535	11	3.40445		90	92	27.1333	93	25.5	51	25.9667	44	29		90	35	12.6192	15	9.95	9	12.225	93	14.575		90	3	0.251889	127	0.175333	44	0.266	36	0.292
91	44	63.9023	94	72.7332	36	67.0309	88	59.0272		91	38	3.73155	98	3.6301	114	4.37503	104	3.41575		91	91	27.0222	80	25.4333	19	25.7667	47	28.75		91	34	12.5192	3	9.83	88	12.225	34	14.5075		91	29	0.251333	37	0.173	70	0.265	80	0.289333
92	13	64.4368	55	72.9412	10	67.8884	27	59.0999		92	50	3.73311	41	3.63852	37	4.38028	65	3.42704		92	50	26.9778	60	25.3	36	25.7333	48	28.2333		92	47	12.475	37	9.7	19	12.1925	36	14.3625		92	48	0.250556	64	0.172667	64	0.264	23	0.288333
93	67	64.4421	67	73.2586	87	68.3853	115	59.2271		93	58	3.77289	22	3.68718	5	4.39731	38	3.53382		93	15	26.9111	127	25.2667	37	25.6	9	28.0667		93	36	12.46	50	9.6	66	11.77	51	14.2125		93	40	0.248444	51	0.167667	9	0.263667	30	0.282667
94	87	64.5824	128	73.3142	32	68.6606	87	59.4587		94	55	3.78225	18	3.71377	94	4.4088	90	3.53661		94	36	26.8444	87	25.2333	3	25.2667	65	28.0667		94	42	12.3025	80	9.5375	40	11.5075	42	14.165		94	23	0.246333	60	0.163	93	0.253	34	0.282
96	37	64.9532	32	76.6158	8	68.7043	105	59.5891		96	80	3.78463	36	3.79333	10	4.40971	58	3.56423		96	34	26.8111	40	25.1	66	24.7	23	27.7667		96	19	12.2708	43	9.3975	72	11.26	48	14.1425		96	35	0.246222	67	0.158	66	0.251333	43	0.279333
97	102	65.0823	80	76.7554	50	68.7375	104	59.8392		97	13	3.79183	67	3.81008	40	4.51708	18	3.56601		97	44	26.5	62	25.0667	93	24.6333	93	27.6667		97	70	12.225	51	9.33	15	11.025	1	14.12		97	64	0.244444	9	0.154667	40	0.247	8	0.277333
98	93	65.3557	114	77.4123	127	68.8933	3	61.7164		98	86	3.80041	34	3.82591	17	4.5302	27	3.60334		98	88	26.1111	49	25.0333	15	24.5	34	27.6333		98	9	12.1192	93	8.905	36	11	9	14.12		98	43	0.24	88	0.153333	29	0.243	44	0.274
99	32	65.4409	99	77.9109	5	69.0039	67	62.13		99	21	3.80669	143	3.86926	50	4.57256	70	3.62165		99	93	25.9333	88	25.0333	9	24.4	36	27.2667		99	15	11.97	60	8.84	50	10.8875	105	13.9075		99	70	0.233444	72	0.148333	49	0.242667	4	0.272333
102	90	66.891	93	78.9335	37	69.2434	65	62.9267		102	18	3.82512	99	3.99806	104	4.65258	25	3.64342		102	9	25.8	9	24.9333	70	24.1667	91	27.0333		102	44	11.9125	30	8.8125	37	10.885	64	13.6925		102	92	0.233222	92	0.145	34	0.241667	17	0.272333
104	88	67.2145	38	79.1667	102	70.2595	63	63.4499		104	36	3.92812	37	4.18197	144	4.66503	14	3.65559		104	37	25.7333	92	24.9333	50	24.0333	87	27		104	88	11.7983	62	8.795	34	10.545	19	13.62		104	17	0.229667	80	0.144	3	0.24	48	0.268667
105	70	67.2923	88	79.953	19	70.832	90	65.2281		105	105	3.95725	32	4.27456	19	4.71394	17	3.68544		105	105	25.5333	43	24.8333	47	23.8667	13	26.4333		105	80	11.7558	67	8.775	49	10.47	3	13.535		105	9	0.225111	43	0.143333	50	0.24	9	0.257
114	21	68.481	37	81.5546	16	70.9035	29	65.6985		114	41	4.02967	102	4.40754	102	4.74144	115	3.72492		114	70	25.4333	51	24.7667	17	23.6667	88	26.1333		114	50	11.75	92	8.775	92	10.4425	94	13.4875		114	44	0.225	62	0.138333	128	0.24	105	0.252667
115	104	69.6275	43	81.8578	38	72.5756	42	66.3876		115	102	4.08784	55	4.49077	13	4.88255	4	3.80206		115	87	25.2333	72	24.6333	42	23.4667	42	25.8		115	92	11.4875	42	8.675	3	10.135	88	13.1175		115	88	0.220556	30	0.137333	92	0.237	93	0.242667
124	17	70.1551	102	83.0128	40	73.1717	38	67.5533		124	114	4.11256	105	4.66398	36	4.96693	29	3.84446		124	47	24.55	44	24.4	87	23.4667	40	25.7667		124	3	11.1667	72	8.645	17	10.1	87	12.8575		124	80	0.214667	44	0.135	37	0.232333	87	0.241333
127	42	70.69	44	85.4701	13	73.2871	86	67.6469		127	3	4.17587	144	4.80793	21	5.10923	86	3.88637		127	40	24.2444	30	23.5	34	23.4333	37	25.7333		127	93	10.9058	87	8.1575	80	10.1	4	12.485		127	49	0.214556	87	0.131	15	0.229667	88	0.223
128	105	72.0505	42	89.845	17	75.224	70	69.1643		128	104	4.36616	114	4.84851	93	5.20436	80	4.00933		128	42	24.1333	42	23.1333	49	23.2667	41	24.4333		128	49	10.8817	44	7.32	87	9.4175	37	11.58		128	93	0.207	93	0.125333	17	0.223667	65	0.212667
143	38	73.0985	105	90.4429	144	75.9062	80	77.1341		143	32	4.55216	104	5.03016	3	5.48299	3	4.14579		143	49	24.1333	70	21.8667	40	21.8667	49	24.1		143	37	10.7217	70	6.56	93	9.2375	49	11.475		143	37	0.205556	70	0.108333	80	0.210667	37	0.211333
144	80	73.6281	144	91.9551	3	78.4565	17	82.3191		144	42	4.72953	42	5.58617	41	5.95356	42	4.81809		144	41	23.7222	38	21.5333	41	20.2667	105	23.2		144	87	10.1442	38	6.46	41	8.615	65	11.225		144	87	0.186778	47	0.106333	87	0.188	49	0.210333
146	144	85.0914	104	92.0488	21	83.5582	144	87.413		146	144	4.9461	44		32	6.37481	144	5.36534		146	38	20.1556	47	21.0333	38	18.7667	38	20.1667		146	38	7.38833	47	5.9825	38	7.98	38	7.725		146	38	0.131333	38	0.099	38	0.157667	38	0.137333
CS	CS	50.225	CS	50.1534	CS	55.1959	CS	45.3256		CS	CS	3.0544	CS	2.96829	CS	3.48147	CS	2.71343		CS	CS	34.1778	CS	32.5	CS	34.8	CS	35.2333		CS	CS	16.06	CS	12.9425	CS	16.635	CS	18.6025		CS	CS	0.331333	CS	0.257	CS	0.348667	CS	0.388333
SQ	SQ	68.3469	SQ	75.1176	SQ	65.8316	SQ	64.0914		SQ	SQ	3.65164	SQ	3.53326	SQ	3.93154	SQ	3.49012		SQ	SQ	24.8778	SQ	21.8333	SQ	22.4333	SQ	30.3667		SQ	SQ	12.145	SQ	8.1875	SQ	12.305	SQ	15.9425		SQ	SQ	0.237333	SQ	0.134667	SQ	0.265	SQ	0.312333
																												31.61																0.217319		0.327713		0.352722
																								t-Test: Paired Two Sample for Means																						1.50798		1.62306
																										Variable 1		Variable 2
																								Mean		34.1778		24.8778
																								Variance		2.15815		22.6859
																								Observations		3		3
																								Pearson Correlation		0.670329
																								Hypothesized Mean Difference		0
																								df		2
																								t Stat		4.0963
																								P(T<=t) one-tail		0.0273738
																								t Critical one-tail		2.91999
																								P(T<=t) two-tail		0.0547477
																								t Critical two-tail		4.30265

## Sheet: Partial correlation matrix
			2007-2009 phenotypic mean data
			100*(0h FW-3h FW)	100*(0h FW-3h FW)	100*(0h FW-3h FW)	100*(0h FW-3h FW)
			(0h FW-DW)	0h leaf FW	leaf DW	leaf area
	Mean 2007-2009	%ELWL0-3h (leaf water)	1
	Mean 2007-2009	%ELWLFW 0-3h (leaf FW)	0.991492	1
	Mean 2007-2009	%ELWLDW 0-3h (leaf DW)	0.7607	0.819965	1
	Mean 2007-2009	3h loss/cm2/h	0.771902	0.807095	0.852378	1
	Mean 2007-2009	Leaf 4 length	-0.406381	-0.371454	-0.139067	-0.211648
	Mean 2007-2009	Leaf 4 width	-0.230825	-0.219115	-0.169899	-0.18548
	Mean 2007-2009	Leaf 4 area	-0.376373	-0.350729	-0.189824	-0.243881
	Mean 2007-2009	FW after 0h	-0.381473	-0.335693	-0.060795	-0.0345705
	Mean 2007-2009	DW (after 48h)	-0.375945	-0.36475	-0.304496	-0.175828
	Mean 2007-2009	Initial leaf water	-0.377252	-0.327426	-0.0272969	-0.0151627
	Mean 2007-2009	0-3h water loss	0.21864	0.270623	0.44553	0.461419
	Mean 2007-2009	SLA cm2/gFW	0.149958	0.0891587	-0.238608	-0.470132
	Mean 2007-2009	SLA cm2/gDW	0.0477729	0.0797297	0.329568	-0.163374
	Mean 2007-2009	DW%FW 0h	0.11933	0.0266795	-0.508297	-0.314891
	New mean 2009	Lamina thickness	-0.257697	-0.223834	-0.131766	-0.0159566
	Mean 2009	Midrib thickness	-0.351497	-0.326034	-0.186641	-0.0838637
	Mean 2009	Stomatal number/unit area	0.0335126	0.0129338	-0.118733	-0.0487322
			P<0.05	P<0.01	P<0.001	P<0.0001
		92df	0.203	0.264	0.334	0.384
			-0.203	-0.264	-0.334	-0.384
			100*(0h FW-3h FW)	100*(0h FW-3h FW)
			(0h FW-DW)	leaf area
			2007-2009 phenotypic mean
	Mean 07-09	%ELWL0-3h	1
	Mean 07-09	3h loss/cm2/h	0.771902	1
	Mean 07-09	Leaf 4 length	-0.406381	-0.211648
	Mean 07-09	Leaf 4 width	-0.230825	-0.18548
	Mean 07-09	Leaf 4 area	-0.376373	-0.243881
	Mean 07-09	FW after 0h	-0.381473	-0.0345705
	Mean 07-09	DW (after 48h)	-0.375945	-0.175828
	Mean 07-09	Initial leaf water	-0.377252	-0.0151627
	Mean 07-09	0-3h water loss	0.21864	0.461419
	Mean 07-09	SLA cm2/gFW	0.149958	-0.470132
	Mean 07-09	SLA cm2/gDW	0.0477729	-0.163374
	Mean 07-09	DW%FW 0h	0.11933	-0.314891
	New mean 2009	Lamina thickness	-0.257697	-0.0159566
	Mean 2009	Midrib thickness	-0.351497	-0.0838637
	Mean 2009	Stomatal number/unit area	0.0335126	-0.0487322
		P<0.05	P<0.01	P<0.001	P<0.0001
	92df	0.203	0.264	0.334	0.384
		-0.203	-0.264	-0.334	-0.384

## Sheet: Corr matrix ELWLW+F+D+A 07-09
		Mean 07-09	Mean 07-09	Mean 07-09	New mn lamina	Thickness at	Mean 07-09	Mean 07-09	Mean 07-09	Mean 07-09	Mean 07-09	Mean 07-09	Mean 07-09	Mean 07-09	Mean 07-09	Mean 07-09	Mean 07-09	Mean 07-09	Mean 07-09	Mean 07-09	Mean 07-09	Mean 07-09	Mean 07-09	Mean 07-09	Mean 07-09	Mean 07-09	Stomatal no
		length	width	leaf area	thickness	Mn midrib	FW after 0h	DW (after 48h)	Initial water	DW%FW 0h	SLA cm2/gFW	0-3h water loss	3h-6h water loss	ELWLW 0-3h	ELWLF 0-3h	ELWLD 0-3h	ELWLA 0-3h	ELWLW 3-6h	ELWLF 3-6h	ELWLD 3-6h	ELWLA 3-6h	ELWLW 0-6h	ELWLF 0-6h	ELWLD 0-6h	ELWLA 0-6h	SLA cm2/gDW	Mean of 6
Mean 07-09	length	1
Mean 07-09	width	0.32637	1
Mean 07-09	leaf area	0.783927	0.833882	1
2009	Lamina thickness	0.197422	0.61124	0.515449	1
2009	Thickness at midrib	0.371608	0.453082	0.505913	0.588354	1
Mean 07-09	FW after 0h	0.779654	0.734287	0.929109	0.583762	0.58514	1
Mean 07-09	DW (after 48h)	0.696567	0.805063	0.927407	0.601717	0.56571	0.914111	1
Mean 07-09	Initial water	0.780663	0.715236	0.917251	0.573758	0.580136	0.998518	0.890692	1
Mean 07-09	DW%FW 0h	-0.288537	-0.0242903	-0.178978	-0.135825	-0.254364	-0.389502	-0.00659049	-0.435825	1
Mean 07-09	SLA cm2/gFW	-0.294153	0.00313187	-0.156267	-0.353944	-0.419819	-0.494928	-0.293169	-0.515568	0.603817	1
Mean 07-09	0-3h water loss	0.586032	0.602891	0.732055	0.420555	0.372609	0.802673	0.69595	0.806555	-0.381648	-0.437286	1
Mean 07-09	3h-6h water loss	0.445606	0.543317	0.615499	0.480499	0.376645	0.662696	0.643418	0.656662	-0.207394	-0.371989	0.661948	1
Mean 07-09	ELWLW 0-3h	-0.406381	-0.230825	-0.376373	-0.257697	-0.351497	-0.381473	-0.375945	-0.377252	0.11933	0.149958	0.21864	-0.0587997	1
Mean 07-09	ELWLF 0-3h	-0.371454	-0.219115	-0.350729	-0.223834	-0.326034	-0.335693	-0.36475	-0.327426	0.0266795	0.0891587	0.270623	-0.0286689	0.991492	1
Mean 07-09	ELWLD 0-3h	-0.139067	-0.169899	-0.189824	-0.131766	-0.186641	-0.060795	-0.304496	-0.0272969	-0.508297	-0.238608	0.44553	0.0784636	0.7607	0.819965	1
Mean 07-09	ELWLA 0-3h	-0.211648	-0.18548	-0.243881	-0.0159566	-0.0838637	-0.0345705	-0.175828	-0.0151627	-0.314891	-0.470132	0.461419	0.168934	0.771902	0.807095	0.852378	1
Mean 07-09	ELWLW 3-6h	-0.339923	-0.134817	-0.27495	-0.0961405	-0.247647	-0.281904	-0.237519	-0.284194	0.1583	0.0848297	0.222778	0.34617	0.836105	0.829552	0.593965	0.658174	1
Mean 07-09	ELWLF 3-6h	-0.107872	0.0276546	-0.0364039	0.118247	-0.0127557	-0.0318755	0.010159	-0.0371023	0.0624456	-0.0565314	0.105466	0.712049	0.20862	0.205611	0.120448	0.20917	0.686692	1
Mean 07-09	ELWLD 3-6h	0.0100245	0.0157239	0.0237947	0.161528	0.0766888	0.106409	-0.00147958	0.119504	-0.306971	-0.268761	0.22473	0.741355	0.137922	0.168739	0.298487	0.29918	0.580533	0.925208	1
Mean 07-09	ELWLA 3-6h	-0.0198546	0.0121457	-0.00147128	0.220952	0.123216	0.132183	0.094619	0.135505	-0.165234	-0.414863	0.25885	0.773331	0.174396	0.194723	0.231367	0.406466	0.619912	0.923069	0.931823	1
Mean 07-09	ELWLW 0-6h	-0.37103	-0.156304	-0.306973	-0.127578	-0.279378	-0.311537	-0.275916	-0.312265	0.146485	0.0950446	0.220941	0.304531	0.874454	0.870341	0.637466	0.694318	0.986815	0.651219	0.550287	0.585448	1
Mean 07-09	ELWLF 0-6h	-0.341627	-0.156331	-0.290201	-0.115458	-0.258978	-0.276327	-0.278071	-0.272498	0.0516635	0.041496	0.26135	0.327727	0.871479	0.876576	0.694968	0.728659	0.980966	0.651211	0.585749	0.604786	0.995192	1
Mean 07-09	ELWLD 0-6h	-0.106121	-0.127668	-0.140268	-0.0361984	-0.115163	-0.0035536	-0.241438	0.0284192	-0.53062	-0.301515	0.446378	0.373835	0.659279	0.719063	0.915815	0.799486	0.713749	0.484566	0.656649	0.574879	0.735429	0.795773	1
Mean 07-09	ELWLA 0-6h	-0.195466	-0.162781	-0.218395	0.106907	-0.020873	-0.0037728	-0.131013	0.0133532	-0.303711	-0.516165	0.420064	0.419762	0.659016	0.702017	0.748262	0.903348	0.753689	0.530543	0.604927	0.703401	0.770478	0.805269	0.845912	1
Mean 07-09	SLA cm2/gDW	0.0019801	0.0223881	0.0238169	-0.269651	-0.231266	-0.117921	-0.31802	-0.0895313	-0.402312	0.457586	-0.0521124	-0.189038	0.0477729	0.0797297	0.329568	-0.163374	-0.0762045	-0.135285	0.0374741	-0.287088	-0.0481804	-0.00480403	0.276121	-0.242823	1
2009	Stomatal no. mean of 6	-0.3523	0.167397	-0.089507	0.202669	-0.201942	-0.131113	-0.00664011	-0.146113	0.310232	0.15627	-0.14896	0.0276659	0.0335126	0.0129338	-0.118733	-0.0487322	0.115859	0.158647	0.034768	0.0972538	0.118193	0.0881863	-0.0790729	0.0414728	-0.12823	1
		P<0.05	P<0.01	P<0.001	P<0.0001
	92df	0.203	0.264	0.334	0.384
		-0.203	-0.264	-0.334	-0.384
		P<0.05	P<0.01	P<0.001	P<0.0001
	71 df	0.23	0.3	0.378	0.435
		-0.23	-0.3	-0.378	-0.435
Trait	Year	Mean of all 52 trials	Mean of 19 control trials	Mean of 12 droughted trials	Site yield of	Site yield of
					7 g/plant	2 g/plant
ELWLW 0-3h	2007	1.065	1.048	1.083	1.086	1.041
	2008	1.004	1.029	0.977	1.025	1.017
	2009	1.024	1.011	1.03	0.984	1.036
	mean	1.031	1.029	1.03	1.0317	1.0313
Mn ELWLW 0-3h	2007-2009	1.074	1.059	1.03	1.108	1.04
ELWLA 0-3h	2007	1.057	1.044	1.054	1.098	1.028
	2008	1.022	1.038	0.99	1.042	1.016
	2009	1.046	1.04	1.04	1.045	1.064
	mean	1.0417	1.0407	1.028	1.0617	1.036
Mn ELWLA 0-3h	2007-2009	1.066	1.06	1.005	1.079	1.062
Leaf length	2007	0.978	0.943	1.026	0.893	0.993
	2008	1.028	1.024	1.049	0.976	1.016
	2009	1.054	1.028	1.077	0.983	1.04
	mean	1.02	0.9983	1.0507	0.9507	1.0163
Mean leaf length	2007-2009	1.02	0.992	1.033	0.964	1.009
Leaf area	2007	0.988	1.015	1.013	0.953	1.022
	2008	1.06	1.06	1.044	1.004	1.041
	2009	1.024	1.058	1.004	1.033	1.031
	mean	1.024	1.0443	1.0203	0.9967	1.0313
Mean leaf area	2007-2009	1.067	1.089	1.066	1.034	1.065

## Sheet: 2007-9 mean data for correlatio
	Mean 07-09	Mean 07-09	Mean 07-09	Mean 07-09	Mean 07-09	Mean 07-09	Mean 07-09	Mean 07-09	Mean 07-09	Mean 07-09	Mean 07-09	Mean 07-09	Mean 07-09	Mean 07-09	Mean 07-09	Mean 07-09	Mean 07-09	Mean 07-09	Mn lamina	Midrib thickness	Mean 07-09	Mean 07-09	Mean 07-09	Mean 07-09	Mean 07-09	Stomatal no
CSDH	ELWLW 0-3h	ELWLF 0-3h	ELWLD 0-3h	ELWLA 0-3h	ELWLW 3-6h	ELWLF 3-6h	ELWLD 3-6h	ELWLA 3-6h	ELWLW 0-6h	ELWLF 0-6h	ELWLD 0-6h	ELWLA 0-6h	0-3h water loss	3h-6h water loss	0-6h water loss	length	width	leaf area	thickness	in microns	FW after 0h	DW (after 48h)	Initial water	DW%FW 0h	SLA cm2/gFW	Mean of 12
1	48.7395	42.1955	317.352	2.88493	27.8018	11.7057	87.6983	0.806494	62.2685	53.9012	405.05	10.786	0.114333	0.0321111	0.146444	30.7	0.577778	13.7939	259.129	667.594	0.271444	0.037	0.234444	13.4746	49.3838	22.1667
2	48.7321	42.365	329.488	2.83114	49.4688	21.7199	169.543	1.43334	73.724	64.0849	499.031	12.4621	0.138222	0.0708889	0.209111	34.3333	0.633333	16.9269	264.934	750.431	0.326444	0.0434444	0.283	13.0756	50.4149	17.1667
3	62.5146	55.1432	469.592	4.17587	84.7417	26.8809	229.925	2.00587	92.9808	82.0242	699.517	18.0825	0.138	0.0712222	0.209222	28.2444	0.522222	11.6133	249.936	611.114	0.251889	0.0298889	0.222	11.751	44.7378	20.75
4	53.2407	44.8947	363.222	3.27199	41.4317	15.9462	131.871	1.12305	69.4594	60.8409	495.093	12.4553	0.118778	0.0432222	0.162	29.4222	0.588889	13.4758	214.812	661.193	0.262778	0.0327778	0.23	12.3998	49.4636	18.9167
5	54.5986	47.6204	373.976	3.14872	57.1511	20.7643	164.395	1.35098	78.3783	68.3846	538.371	13.1599	0.161667	0.0715556	0.233222	30.7556	0.755556	18.2251	257.369	787.331	0.337889	0.0428889	0.295	12.6361	52.2795	23.1667
7	45.6532	39.1596	287.248	2.64147	31.8373	13.7833	101.033	0.924759	61.7327	52.943	388.281	10.4354	0.129111	0.0441111	0.173222	30.4889	0.677778	16.2569	256.482	682.655	0.317333	0.0437778	0.273556	13.7929	51.1101	24.0833
8	57.7445	49.5259	357.728	2.86748	57.0229	17.1305	122.104	0.999711	77.7633	66.6564	479.832	11.2987	0.128889	0.0461111	0.175	28.8444	0.688889	15.5619	253.009	663.452	0.259222	0.0365556	0.222667	14.1852	59.0601	29.1667
9	49.503	42.7693	315.705	2.68005	34.9766	14.7778	108.52	0.913638	66.6217	57.5471	424.224	10.5014	0.0974444	0.0335556	0.131	25.8	0.622222	12.6039	248.791	590.028	0.225111	0.0308889	0.194222	13.6312	55.3563	28.25
10	54.4862	47.7052	386.997	3.21171	78.6669	30.8196	247.355	2.0174	89.7723	78.5248	634.352	15.2729	0.167778	0.101778	0.269556	31.6556	0.722222	17.8785	265.16	650.65	0.341222	0.0425556	0.298667	12.5065	51.6888	25.4167
11	56.5857	49.3412	386.691	3.499	48.9403	18.3436	143.515	1.30242	77.6268	67.6848	530.207	14.0453	0.160778	0.0601111	0.220889	29.7667	0.677778	15.8054	264.048	739.511	0.326222	0.0421111	0.284111	12.7776	47.4358	23.5833
12	52.4122	45.2959	334.854	3.18093	33.257	11.716	86.4007	0.826648	65.9741	57.0119	421.255	11.5877	0.153944	0.0403889	0.194333	30.6111	0.7	16.7665	273.218	781.118	0.344111	0.0466111	0.2975	13.5258	48.3287	21.375
13	64.4368	56.1291	437.67	3.79183	72.4945	22.0289	172.816	1.44989	89.7047	78.158	610.486	15.4303	0.172111	0.0665556	0.238667	28.7667	0.622222	15.9137	265.09	661.381	0.306778	0.0398889	0.266889	12.8866	50.6263	24.375
14	55.5572	48.5108	382.974	3.36295	61.7284	22.9347	180.796	1.59773	81.8292	71.4455	563.77	14.5248	0.158333	0.0757778	0.234111	31.2778	0.677778	16.4979	255.633	718.426	0.330556	0.0421111	0.288444	12.706	48.3702	28
15	56.6519	49.4953	395.104	3.41221	65.6433	24.1402	195.023	1.68294	84.2391	73.6355	590.126	14.8889	0.121667	0.0615556	0.183222	26.9111	0.588889	12.4488	248.514	722.191	0.255667	0.0313333	0.224333	12.5216	48.3617	21.9167
16	56.6164	48.8024	354.774	3.10215	64.4591	22.0553	158.808	1.38347	82.242	70.8577	513.582	13.0734	0.135444	0.0608889	0.196333	30	0.655556	15.4301	242.33	605.089	0.283556	0.0395556	0.244	13.948	53.2415	31.4167
17	70.1551	58.2389	415.446	3.56034	72.9671	16.9983	121.142	1.04227	87.6767	75.2372	536.588	13.4082	0.138444	0.0376667	0.176111	27.4889	0.622222	13.4472	226.224	699.222	0.229667	0.0325556	0.197111	14.274	56.1652	20.6667
18	63.8282	55.6173	434.525	3.82512	81.6206	25.2442	196.742	1.74144	92.81	80.8616	631.267	16.2756	0.190444	0.0875556	0.278	30.4222	0.733333	17.329	268.897	682.278	0.345444	0.045	0.300444	12.8846	48.6199	33.0833
19	55.6061	49.3093	438.371	3.56177	52.4192	18.4428	163.295	1.32017	76.4137	67.7521	601.666	14.2422	0.130889	0.0482222	0.179111	28.4556	0.577778	12.7617	262.779	725.58	0.269333	0.031	0.238333	11.4585	46.3887	27.4167
20	54.8739	47.7292	369.715	2.90187	44.3015	16.3455	125.149	0.995962	73.6983	64.0748	494.864	11.3731	0.175667	0.0615556	0.237222	29.8667	0.888889	20.7393	282.262	726.709	0.365556	0.048	0.317556	12.9846	55.3097	26.1667
21	68.481	59.6169	462.419	3.80669	88.8781	24.3819	185.655	1.5372	96.5715	83.9987	648.074	15.6299	0.180889	0.0743333	0.255222	28.4444	0.733333	16.2985	255.906	629.187	0.304667	0.0401111	0.264556	13.023	53.3199	21.9167
22	54.7012	48.2467	410.815	3.64517	61.0925	22.7811	193.262	1.7038	80.545	71.0278	604.077	15.6036	0.146667	0.0693333	0.216	29.8111	0.611111	14.2246	263.151	805.028	0.312778	0.0372222	0.275556	11.8152	44.1444	22.75
23	54.4823	46.8587	335.207	2.63928	58.8395	22.5258	161.489	1.25735	80.6635	69.3844	496.696	11.383	0.114556	0.0545556	0.169111	27.7222	0.7	15.0687	252.478	652.156	0.246333	0.0345556	0.211778	13.9725	60.1768	27.9167
24	50.9217	44.1982	335.285	3.03118	44.6337	18.561	140.341	1.28272	72.3169	62.7592	475.626	12.6133	0.136556	0.0582222	0.194778	30.1	0.666667	15.6355	254.989	658.557	0.311889	0.0413333	0.270556	13.2225	48.9872	26.9167
25	52.8584	47.4864	506.195	3.54181	39.8943	15.9234	159.935	1.19593	70.6656	63.4098	666.13	13.86	0.197222	0.0651111	0.262333	37.2	0.655556	18.9765	250.379	667.97	0.410222	0.0417778	0.368444	11.0553	44.7809	26.75
26	47.2056	40.8446	318.836	2.6878	33.0385	13.9775	109.536	0.931492	63.3426	54.8221	428.371	10.6018	0.144556	0.0497778	0.194333	37.1778	0.644444	18.72	238.317	689.809	0.352667	0.046	0.306667	13.015	51.5759	22.5
27	57.9105	49.7161	353.718	3.39613	77.7433	27.7655	198.263	1.89664	90.2335	77.4816	551.982	15.495	0.172111	0.0954444	0.267556	32.5333	0.7	17.5717	260.15	649.897	0.345222	0.0487778	0.296444	14.0911	49.3262	30.6667
28	50.7045	44.3296	354.278	2.92563	40.7547	17.24	137.178	1.13333	70.4376	61.5695	491.456	11.8682	0.162556	0.0635556	0.226111	33.8556	0.733333	19.3683	255.84	704.87	0.365667	0.046	0.319667	12.5372	50.9879	23.5833
29	61.0333	53.5877	444.104	3.47486	76.5353	25.7965	217.848	1.67812	90.3349	79.3841	661.951	15.0833	0.136444	0.0645556	0.201	29.1444	0.588889	13.3943	233.56	706.565	0.251333	0.0307778	0.220556	12.0825	51.5275	28
30	50.527	44.1266	355.178	2.83714	39.981	17.0002	136.339	1.08056	70.0002	61.1268	491.517	11.4469	0.132	0.0495556	0.181556	28.0222	0.688889	15.4102	218.283	630.693	0.302778	0.0376667	0.265111	12.6204	53.4223	25.75
31	50.0621	44.08	372.923	2.99352	44.2833	18.5618	156.855	1.24038	71.1473	62.6418	529.778	12.3866	0.165778	0.068	0.233778	33.0333	0.744444	19.2504	259.472	754.949	0.382111	0.0466667	0.335444	12.1237	49.5314	24.5833
32	65.4409	58.7049	613.414	4.55216	74.954	23.4683	217.061	1.71365	91.9	82.1732	830.475	18.5355	0.186889	0.0741667	0.261056	28.8389	0.633333	14.2987	246.568	548.421	0.316611	0.0320556	0.284556	11.1451	46.4893	26.125
33	56.6033	49.4007	390.274	3.36615	64.5154	24.1412	191.859	1.61181	84.2408	73.5419	582.133	14.5488	0.151889	0.0734444	0.225333	30.8667	0.655556	15.7924	254.848	654.415	0.311111	0.0401111	0.271	12.7396	49.8479	22.8333
34	62.5079	54.3114	415.308	3.69778	78.3171	25.5759	195.108	1.7343	91.9527	79.8873	610.416	15.8703	0.136444	0.0661111	0.202556	26.8111	0.622222	13.0199	253.843	606.219	0.253333	0.0333333	0.22	13.1418	49.3353	33.9167
35	57.183	49.0749	347.18	3.16902	55.0005	19.0626	134.571	1.22123	79.4047	68.1375	481.751	12.8077	0.118222	0.0455556	0.163778	27.8778	0.6	13.1239	240.139	680.772	0.246222	0.0353333	0.210889	14.2469	51.9213	30.25
36	62.3796	54.534	435.328	3.92812	72.3309	22.8137	180.669	1.62308	88.5055	77.3477	615.997	16.194	0.141	0.0605556	0.201556	26.8444	0.611111	12.9584	264.073	603.959	0.262333	0.0335556	0.228778	12.636	47.7288	28.5
37	64.9532	56.0929	413.296	3.60551	69.0931	17.3746	127.218	1.11806	85.0965	73.4675	540.513	13.7527	0.113	0.0357778	0.148778	25.7333	0.555556	11.1505	230.8	545.22	0.205556	0.028	0.177556	13.685	52.6858	32.4167
38	73.0985	60.4522	450.467	3.73155	85.1334	21.8202	161.589	1.28772	95.3155	82.2724	612.056	14.1756	0.0781111	0.0293333	0.107444	20.1556	0.488889	7.68387	222.709	524.887	0.131333	0.0182222	0.113111	13.6568	57.3142	27.4167
39	60.8314	52.8209	405.386	3.53343	68.3597	22.3307	171.849	1.51662	86.5399	75.1516	577.235	14.7486	0.155556	0.0687778	0.224333	29.5222	0.666667	15.4605	266.938	661.193	0.304778	0.0408889	0.263889	13.2619	50.0533	32.5
40	63.5286	55.0037	412.297	3.47132	63.8599	17.8208	132.724	1.12186	84.1299	72.8245	545.02	13.3822	0.129222	0.0434444	0.172667	24.2444	0.711111	13.572	268.035	681.149	0.248444	0.0337778	0.214667	13.4939	53.5673	31
41	50.6814	44.6969	384.865	4.02967	36.2597	14.5723	124.051	1.29711	68.8844	59.2693	508.915	15.5013	0.138333	0.046	0.184333	23.7222	0.711111	13.3241	265.895	728.592	0.324	0.0403333	0.283667	12.0878	41.6964	31.25
42	70.69	61.7021	493.816	4.72953	79.7048	20.3654	150.613	1.70909	94.2941	82.0675	644.428	18.8513	0.170667	0.068	0.238667	24.1333	0.677778	12.7946	249.546	676.63	0.294333	0.0397778	0.254556	12.6422	43.1434	32.1667
43	54.6789	48.0527	398.999	2.70902	46.0271	16.4522	133.115	0.996275	73.4716	64.5048	532.113	10.8099	0.102556	0.0425556	0.145111	27.8889	0.633333	13.9655	235.228	658.18	0.24	0.0297778	0.210222	12.2982	58.2894	26.8333
44	63.9023	55.6227	432.392	3.00744	70.6154	18.913	147.285	1.19231	85.6361	74.5357	579.678	13.3225	0.114556	0.0454444	0.16	26.5	0.588889	12.389	234.117	644.249	0.225	0.029	0.196	12.9533	53.2236	25.8333
45	52.9373	46.7373	402.232	3.16379	45.095	18.3642	156.716	1.23642	73.7625	65.1015	558.949	12.9144	0.140556	0.0554444	0.196	33.5	0.594444	15.5697	239.467	646.131	0.302111	0.0356111	0.2665	11.7569	49.6661	15.875
46	48.8219	42.9637	360.536	2.87114	36.121	15.9131	132.394	1.06632	66.9262	58.8768	492.93	11.5058	0.132	0.0493333	0.181333	28.9889	0.7	15.9137	261.733	605.466	0.310444	0.0377778	0.272667	12.0155	50.0789	28.0833
47	57.3847	50.8051	447.823	3.38578	65.3123	23.0076	200.117	1.5477	83.4069	73.8127	647.941	14.4654	0.123333	0.0593889	0.182722	24.55	0.65	12.974	278.825	689.621	0.268556	0.0319444	0.236611	11.5695	50.1709	23.375
48	53.4193	46.9214	398.199	2.9643	52.5545	21.0915	176.116	1.3313	77.4804	68.0129	574.315	12.553	0.115333	0.0526667	0.168	27.6111	0.622222	13.4221	241.112	658.557	0.250556	0.0311111	0.219444	12.2757	53.6275	24.6667
49	53.0542	45.8503	343.61	2.98974	46.308	18.109	135.918	1.1971	74.001	63.9593	479.528	12.2367	0.0973333	0.0387778	0.136111	24.1333	0.6	11.3169	232.228	549.362	0.214556	0.0284444	0.186111	13.1905	51.7703	25.6667
50	58.0809	50.6619	398.931	3.73311	71.471	25.7885	202.156	1.85899	87.6648	76.4504	601.088	16.3369	0.126333	0.0672222	0.193556	26.9778	0.577778	12.22	232.409	746.666	0.254667	0.0328889	0.221778	12.7888	46.1786	25.9167
51	58.34	50.9846	413.432	3.28313	77.3558	27.0899	217.902	1.78811	89.3512	78.0744	631.335	14.817	0.125778	0.0691667	0.194944	28.3944	0.605556	13.3501	240.102	665.899	0.252556	0.0325556	0.22	12.6712	51.4351	19.25
52	51.3483	44.0673	313.034	2.74533	45.2864	17.7935	126.882	1.10794	72.0689	61.8608	439.917	11.2434	0.152111	0.0614444	0.213556	30.8111	0.788889	19.1863	281.991	763.61	0.353444	0.0512222	0.302222	14.2076	53.4101	32.9167
53	45.7124	39.3669	284.961	2.5094	37.6862	16.9792	123.81	1.088	65.4051	56.3461	408.771	10.5296	0.138333	0.0582222	0.196556	32.6667	0.766667	19.5087	255.313	671.735	0.355556	0.0501111	0.305444	13.9176	52.7304	30.5
54	44.5417	38.6845	296.812	2.7167	42.035	19.9086	153.115	1.37397	67.463	58.5931	449.927	11.9622	0.147333	0.0743333	0.221667	31.0333	0.811111	21.1475	298.37	776.412	0.390778	0.0522222	0.338556	13.1629	49.0872	29.1667
55	60.7798	53.3908	440.206	3.78225	73.1985	24.4007	198.895	1.71966	88.604	77.7915	639.101	16.0586	0.186222	0.0897778	0.276	31.5889	0.711111	17.6263	259.119	681.149	0.359111	0.0441111	0.315	12.2234	47.2353	24.0833
56	47.8263	41.7796	333.441	2.81075	41.0656	18.0087	143.737	1.22796	68.4413	59.7883	477.178	11.7821	0.13	0.0571111	0.187111	30.1889	0.677778	16.3098	272.153	717.673	0.321333	0.0415556	0.279778	12.7885	50.4491	30.5833
57	58.9532	50.7147	364.192	3.31733	79.4413	27.9372	196.546	1.8465	91.5453	78.6519	560.738	15.1037	0.149	0.0863333	0.235333	28.9889	0.7	15.8513	262.336	656.298	0.301	0.0427778	0.258222	14.0766	51.0729	28.8333
58	62.8771	54.8637	433.44	3.77289	82.3524	26.3588	206.316	1.82538	93.122	81.2225	639.756	16.3668	0.187889	0.093	0.280889	32.4	0.688889	17.4659	260.914	692.821	0.347667	0.0447778	0.302889	12.7916	49.5198	23.8333
59	54.1542	47.3672	380.365	3.39295	59.6409	23.2418	185.614	1.64948	80.7443	70.609	565.98	14.7366	0.177667	0.0877778	0.265444	32.5556	0.722222	18.4955	271.964	761.727	0.379111	0.0478889	0.331222	12.5415	46.9717	22.6667
60	50.007	43.4717	335.589	2.81199	41.9169	17.6404	136.739	1.13772	70.2918	61.1121	472.328	11.511	0.114556	0.0445556	0.159111	28.4444	0.644444	14.5773	270.132	709.389	0.270333	0.0356667	0.234667	13.1364	52.1691	26.3333
61	47.4233	41.687	347.019	3.12608	40.4522	18.0455	149.094	1.34744	67.9729	59.7325	496.113	13.0478	0.159889	0.0706667	0.230556	30.1111	0.777778	18.46	273.893	760.597	0.401333	0.0493333	0.352	12.1651	44.8354	21.1667
62	52.0577	45.7207	390.682	2.78941	42.1104	17.3546	147.325	1.05589	71.832	63.0752	538.007	11.2236	0.121556	0.0464444	0.168	28.2889	0.666667	15.0263	234.569	651.779	0.264667	0.0334444	0.231222	12.1709	56.1707	27.9167
63	62.1428	53.2889	375.96	3.40047	74.1049	23.5465	168.587	1.49971	89.5332	76.8354	544.547	14.3273	0.209	0.0898889	0.298889	31.1444	0.855556	21.0713	266.82	699.222	0.391667	0.056	0.335667	14.1584	52.3561	29.6667
64	53.5315	46.3424	348.202	2.84567	41.5785	16.3443	121.702	1.0166	72.439	62.6867	469.905	11.3034	0.110222	0.0394444	0.149667	29.3111	0.588889	13.4039	221.256	573.46	0.244444	0.0333333	0.211111	13.4704	54.7665	26.1667
65	61.673	54.3025	466.398	3.61261	55.9973	18.6425	158.455	1.23902	82.8763	72.945	624.852	14.1789	0.158556	0.0534444	0.212	31.1222	0.622222	15.1658	218.038	573.084	0.291778	0.0338889	0.257889	11.9067	50.3427	20.4167
66	60.1108	55.7873	416.371	3.26812	68.0709	18.2467	135.992	1.20486	85.557	74.034	552.363	13.896	0.133667	0.0473333	0.181	28.1778	0.611111	13.4949	261.12	660.063	0.252667	0.0342222	0.218444	13.5234	52.7776	21.8333
67	64.4421	55.4933	402.041	3.51353	80.2019	23.9732	172.434	1.51747	92.3164	79.4665	574.474	14.6982	0.156444	0.0742222	0.230667	30.8778	0.655556	16.1183	237.534	578.355	0.295111	0.042	0.253111	13.9649	53.5534	25.5
69	55.1225	48.1024	380.032	3.10706	60.381	22.7762	178.699	1.45545	81.2494	70.8786	558.731	13.3549	0.146333	0.0674444	0.213778	30.3778	0.666667	15.7855	240.029	624.669	0.297556	0.0381111	0.259444	12.7246	52.9319	25.0833
70	67.2923	56.9377	374.822	3.50841	87.7083	24.1267	158.585	1.52083	95.67	81.0644	533.407	14.7082	0.129333	0.0591111	0.188444	25.4333	0.622222	12.714	259.322	565.93	0.233444	0.0368889	0.196556	15.4241	54.1122	31.1667
71	51.1568	44.7706	359.323	2.93249	45.8115	19.052	152.125	1.26198	72.9424	63.8226	511.447	12.2838	0.204889	0.0886667	0.293556	35.1333	0.877778	24.0708	280.124	789.967	0.459333	0.0578889	0.401444	12.5276	50.9751	25.75
72	61.0409	52.7961	395.163	3.52819	61.5172	19.9572	147.867	1.34006	84.1534	72.7533	543.03	14.2076	0.132556	0.052	0.184556	27.8444	0.6	13.3943	259.925	650.273	0.258444	0.0355556	0.222889	13.5306	51.1096	33.6667
80	73.6281	63.5591	467.385	3.78463	86.7966	19.4288	142.437	1.21531	96.1019	82.9879	609.822	14.6157	0.134333	0.0427778	0.177111	27.3778	0.566667	12.2261	237.102	630.317	0.214667	0.0294444	0.185222	13.6875	56.4146	23.1667
86	61.5999	53.8165	428.195	3.80041	70.782	23.0206	183.644	1.63071	87.9392	76.8371	611.838	15.8777	0.163333	0.0693333	0.232667	30.3667	0.633333	15.0046	261.666	770.764	0.300667	0.0378889	0.262778	12.5672	47.6254	25.25
87	64.5824	55.8113	419.275	3.41848	68.2057	20.1113	150.741	1.22543	87.8632	75.9226	570.016	13.5759	0.102889	0.0381111	0.141	25.2333	0.533333	10.5499	239.071	616.009	0.186778	0.0256667	0.161111	13.5239	55.4639	24.1667
88	67.2145	57.2627	390.378	3.47205	74.0166	20.0548	135.121	1.2475	90.7184	77.3174	525.5	13.7745	0.121222	0.0457778	0.167	26.1111	0.6	12.2703	237.304	613.373	0.220556	0.0328889	0.187667	14.845	56.1227	24.25
90	66.891	58.6655	483.94	3.53977	73.6052	20.4548	168.234	1.22092	90.2318	79.1202	652.174	13.9194	0.167333	0.0588889	0.226222	27.3444	0.777778	16.6781	263.707	626.928	0.291111	0.0367778	0.254333	12.3449	56.4788	28
91	56.7075	49.0963	367.44	3.24811	65.2268	23.8999	176.382	1.5554	84.3778	72.9963	543.822	14.0275	0.151	0.0756667	0.226667	27.0222	0.777778	16.3774	275.647	721.814	0.314556	0.0427778	0.271778	13.4663	51.0435	28.5833
92	55.806	48.939	400.545	3.29499	55.9305	21.1448	171.115	1.43578	79.9618	70.0838	571.66	13.8248	0.110667	0.05	0.160667	27.1333	0.555556	11.947	247.575	733.487	0.233222	0.0295556	0.203667	12.3831	51.0441	25.0833
93	65.3557	56.429	421.668	3.63934	54.3271	14.4989	105.863	0.912666	82.2145	70.9279	527.531	13.2576	0.112667	0.0296667	0.142333	25.9333	0.555556	11.3421	234.564	541.078	0.207	0.0291111	0.177889	13.9252	56.3031	25.4167
94	60.4681	52.8187	425.159	3.63073	54.7472	16.6705	134.231	1.22615	79.5585	69.4892	559.39	14.9484	0.147	0.0473333	0.194333	33.1333	0.511111	13.221	237.643	658.557	0.286222	0.0363333	0.249889	12.7168	45.6071	24.5
96	59.315	51.7663	408.77	3.47702	52.8725	17.3262	136.988	1.15961	79.1631	69.0924	545.758	13.5274	0.133889	0.0446667	0.178556	30.0556	0.577778	13.5599	261.673	689.056	0.266778	0.0341111	0.232667	12.7614	50.2525	22.8333
97	57.997	50.7257	414.479	3.16103	57.9548	21.1263	173.413	1.30725	82.1431	71.852	587.892	13.0589	0.154	0.0656667	0.219667	30.1778	0.7	16.8957	258.177	744.783	0.308444	0.0394444	0.269	12.5231	53.9715	27
98	51.3167	44.9972	368.127	3.1922	40.9542	16.602	135.197	1.18454	70.2612	61.5991	503.324	12.7635	0.181444	0.0672222	0.248667	40.0111	0.633333	19.9593	249.158	710.518	0.411	0.0505556	0.360444	12.3546	46.9859	20.8333
99	58.5619	50.7328	381.909	3.13273	61.6577	20.5264	148.898	1.29528	82.4284	71.2592	530.807	12.956	0.151778	0.0656667	0.217444	31.3889	0.7	17.2579	230.391	640.107	0.310444	0.0421111	0.268333	13.5718	53.694	26.4167
102	65.0823	58.0218	537.031	4.08784	64.8828	16.1921	147.988	1.18172	83.2744	74.2139	685.019	15.3668	0.182111	0.0544444	0.236556	28.8	0.7	15.7109	255.728	680.396	0.331444	0.0368889	0.294556	11.0042	47.5466	26.3333
104	69.6275	60.9429	495.757	4.36616	71.1612	18.4174	150.169	1.45384	90.62	79.3603	645.926	16.9798	0.219111	0.0758889	0.295	30.4111	0.755556	18.0553	270.787	748.36	0.378556	0.0474444	0.331111	12.4563	46.5634	24.25
105	72.0505	62.763	489.923	3.95725	70.8453	15.6575	118.955	1.03705	90.1082	78.4205	608.878	14.5623	0.158667	0.0437778	0.202444	25.5333	0.7	13.8727	257.761	632.953	0.255556	0.0334444	0.222111	13.019	53.4551	26.4167
114	63.2942	55.4349	449.954	4.11256	80.7777	23.5494	187.948	1.76297	90.2633	78.9843	637.902	15.5109	0.175667	0.0793889	0.255056	29.4444	0.666667	15.3816	270.692	770.952	0.330778	0.0427778	0.288	12.7161	45.0506	22.5
115	55.2659	48.8549	426.871	3.40821	44.5649	13.9683	125.822	1.15621	70.8335	62.6766	551.625	12.8074	0.199333	0.059	0.258333	38.5889	0.666667	20.0789	253.07	633.706	0.401667	0.0462222	0.355444	11.5799	48.2791	21.25
124	56.487	49.8454	426.934	3.34654	55.85	19.3496	166.268	1.31862	78.4056	69.195	593.202	13.6141	0.149444	0.0591111	0.208556	29.6222	0.677778	15.6546	271.913	644.249	0.312222	0.0366667	0.275556	11.7657	49.5923	25.25
127	60.8773	51.873	356.383	3.16429	68.4651	22.3571	156.809	1.35209	87.0206	74.2301	513.193	13.206	0.140667	0.059	0.199667	27.8333	0.688889	15.1242	249.94	664.205	0.270889	0.0408889	0.23	14.6764	55.1009	28.0833
128	59.5743	50.8674	354.209	2.7455	73.1456	23.9355	159.938	1.31716	87.844	74.8029	514.147	11.8928	0.127889	0.0657778	0.193667	28.9	0.722222	16.3436	238.194	623.539	0.260111	0.0392222	0.220889	15.0401	62.9551	31.4167
143	52.6739	47.0682	444.388	3.57274	55.2672	22.0022	208.914	1.66115	77.2788	69.0704	653.302	15.5952	0.206	0.0950556	0.301056	33.7889	0.772222	20.5673	289.849	761.915	0.450889	0.0483333	0.402556	10.6472	43.9582	26.5
144	85.0914	75.1026	640.96	4.9461	92.4025	12.3606	104.422	0.841892	99.1151	87.4632	745.382	16.9309	0.244556	0.0451111	0.289667	31.2889	0.7	17.1167	238.038	679.643	0.331667	0.0392222	0.292444	11.756	50.8644	20.8333
146	57.7182	50.6231	414.932	3.16461	63.1802	23.4237	189.051	1.47108	84.4892	74.0469	603.984	13.5547	0.164444	0.0821111	0.246556	30.7778	0.755556	18.2459	255.474	666.841	0.333222	0.0421111	0.291111	12.3438	53.5544	24.6667
CS	50.225	44.0644	370.96	3.0544	34.842	14.9537	125.026	1.03807	67.2914	59.0181	495.986		0.145444	0.0505556	0.196	34.1778	0.622222	16.7024			0.331333	0.0416667	0.289667	12.2393	48.7838	23.75
SQ	68.3469	57.5591	367.289	3.65164	91.5694	24.0935	151.982	1.5538	97.0165	81.6526	519.271		0.132778	0.0591111	0.191889	24.8778	0.644444	12.6308			0.237333	0.0384444	0.198889	15.868	52.8361	26.6667

## Sheet: 2007 2008 2009 data+means
	Mean 2007	Mean08	Mean 2009	Mean 07-09	Mean 0-3h 2007	Mean 0-3h 08	Mean 0-3h 2009	Mean 07-09	Mean 2007	Mean 2008	Mean 2009	Mean 07-09	Mean 2007	Mean 2008	Mean 2009	Mean 07-09	Mean 2007	Mean08	Mean 2009	Mean 07-09	Mean 2007	Mean 2008	Mean 2009	Mean 07-09	Mean 2007	Mean 2008	Mean 2009	Mean 07-09	Mean 2007	Mean08	Mean 3-6h 2009	Mean 07-09	Mean 2007	Mean08	Mean 3-6h 2009	Mean 07-09	Mean 2007	Mean08	Mean 0-6h 2009	Mean 07-09	Mean 0-6h 2007	Mean 0-6h 08	Mean 0-6h 2009	Mean 07-09	Mean 0-6h 2007	Mean 0-6h 08	Mean 0-6h 2009	Mean 07-09	Mean 2007
CSDH	%ELWL0-3h	%ELWL0-3h	%ELWL 0-3h	%ELWL0-3h	3h loss/cm2/h	3h loss/cm2/h	wt loss/sq cm/h	3h loss/cm2/h	%ELWLFW 0-3h	%ELWLFW 0-3h	%ELWLFW 0-3h	%ELWLFW 0-3h	%ELWLDW 0-3h	%ELWLDW 0-3h	%ELWLDW 0-3h	%ELWLDW 0-3h	%ELWL 3-6h	%ELWL 3-6h	%ELWL 3-6h	%ELWL 3-6h	ELWLF 3-6h	ELWLF 3-6h	ELWLF 3-6h	ELWLF 3-6h	ELWLD 3-6h	ELWLD 3-6h	ELWLD 3-6h	ELWLD 3-6h	3-6h loss/cm2/h	3-6h loss/cm2/h	wt loss/sq cm/h	wt loss/sq cm/h	3-6h loss/cm2	3-6h loss/cm2	wt loss/cm2	wt loss/cm2	%ELWL 0-6h	%ELWL 0-6h	%ELWLW 0-6h	%ELWLW 0-6h	wt loss/cm2/h	loss/cm2/h	wt loss/sq cm/h	wt loss/sq cm/h	wt loss/cm2	loss/cm2	wt loss/cm2	wt loss/cm2	%ELWLFW 0-6h
1	45.2603	57.711	43.2471	48.7395	2.38338	3.52969	2.74173	2.88493	39.682	49.9286	36.9759	42.1955	322.677	372.014	257.365	317.352	19.6034	40.3329	23.469	27.8018	9.37506	14.405	11.3371	11.7057	76.2632	107.857	78.9746	87.6983	0.562736	1.01931	0.837434	0.806494	1.68821	3.05794	2.5123	2.41948	55.9528	74.3483	56.5046	62.2685	2.94611	4.54901	1.78958	3.0949	8.83834	13.647	5.36874	9.2847	49.057
2	43.6133	59.2827	43.3004	48.7321	2.29476	3.55171	2.64693	2.83114	38.7184	51.5419	36.8347	42.365	345.354	394.856	248.255	329.488	51.6325	51.383	45.3909	49.4688	25.8396	17.9789	21.3413	21.7199	229.969	137.861	140.798	169.543	1.53276	1.23415	1.53311	1.43334	4.59829	3.70245	4.59934	4.30003	72.7276	79.9588	68.4856	73.724	3.82753	4.78586	2.09002	3.5678	11.4826	14.3576	6.27006	10.7034	64.558
3	47.3709	78.4565	61.7164	62.5146	2.89883	5.48299	4.14579	4.17587	42.1045	69.3233	54.0018	55.1432	380.861	595.833	432.082	469.592	67.2676	94.4499	92.5075	84.7417	31.756	18.0512	30.8357	26.8809	288.622	155.317	245.835	229.925	2.22311	1.42707	2.36744	2.00587	6.66932	4.2812	7.10231	6.01761	83.0836	98.8832	96.9756	92.9808	5.12194	6.91006	3.25662	5.0962	15.3658	20.7302	9.76985	15.2886	73.8604
4	36.4655	66.0547	57.2018	53.2407	2.1973	3.81662	3.80206	3.27199	29.1197	54.9283	50.6361	44.8947	243.163	404.265	442.239	363.222	17.3815	36.7783	70.1352	41.4317	10.2729	11.5416	26.0241	15.9462	84.6859	84.3791	226.547	131.871	0.652901	0.777393	1.93887	1.12305	1.9587	2.33218	5.81661	3.36916	44.7851	76.9805	86.6126	69.4594	2.55005	4.43292	2.87046	3.28448	7.65016	13.2988	8.61139	9.85343	39.3926
5	41.4806	69.0039	53.3113	54.5986	2.01421	4.39731	3.03463	3.14872	36.6132	59.8787	46.3693	47.6204	312.184	453.15	356.593	373.976	35.0369	74.3619	62.0545	57.1511	18.1199	19.1494	25.0234	20.7643	154.924	145.516	192.746	164.395	0.994695	1.41223	1.64603	1.35098	2.98409	4.23668	4.93809	4.05295	62.002	91.0581	82.0747	78.3783	3.00891	5.80954	2.34033	3.71959	9.02672	17.4286	7.02099	11.1588	54.7331
7	35.4716	57.1823	44.3055	45.6532	1.73458	3.33839	2.85145	2.64147	31.1464	47.7183	38.6141	39.1596	256.579	304.424	300.741	287.248	21.6269	45.8684	28.0166	31.8373	12.2497	15.5361	13.5642	13.7833	100.731	96.7877	105.581	101.033	0.679915	1.09398	1.00039	0.924759	2.03974	3.28193	3.00116	2.77428	49.4257	75.9021	59.8703	61.7327	2.41449	4.43236	1.92592	2.92426	7.24348	13.2971	5.77776	8.77277	43.3962
8	49.047	68.7043	55.4823	57.7445	2.21278	3.8508	2.53886	2.86748	42.2093	59.5297	46.8388	49.5259	303.333	469.083	300.769	357.728	31.1455	74.406	65.5173	57.0229	13.5465	17.2281	20.6168	17.1305	97.1833	138.36	130.769	122.104	0.706761	1.1043	1.18807	0.999711	2.12028	3.31291	3.5642	2.99913	64.7922	88.537	79.9608	77.7633	2.91954	4.95511	1.86346	3.24604	8.75863	14.8653	5.59039	9.73811	55.7558
9	42.7908	58.297	47.4212	49.503	1.91212	3.63182	2.4962	2.68005	37.0775	50.4986	40.7319	42.7693	278.093	378.959	290.062	315.705	26.5887	40.4734	37.8675	34.9766	13.1726	14.5826	16.5781	14.7778	99.053	108.707	117.799	108.52	0.67756	1.04921	1.01414	0.913638	2.03268	3.14763	3.04243	2.74091	57.987	75.1494	66.7285	66.6217	2.58968	4.68103	1.75517	3.00863	7.76904	14.0431	5.26552	9.02588	50.2501
10	45.9419	67.8884	49.6283	54.4862	2.44346	4.40971	2.78194	3.21171	40.06	59.3332	43.7224	47.7052	320.642	471.143	369.207	386.997	75.5272	84.6439	75.8296	78.6669	35.5687	23.3264	33.5637	30.8196	273.584	185.656	282.825	247.355	2.18599	1.73616	2.13004	2.0174	6.55796	5.20849	6.39011	6.05219	87.0106	94.5695	87.7367	89.7723	4.62945	6.14588	2.45599	4.41044	13.8884	18.4376	7.36796	13.2313	75.6287
11	58.7217	56.0044	55.031	56.5857	3.30088	3.79167	3.40445	3.499	51.4615	48.7554	47.8069	49.3412	417.078	377.656	365.341	386.691	48.4079	38.8976	59.5152	48.9403	17.2692	14.5177	23.2438	18.3436	139.839	111.587	179.119	143.515	1.1058	1.13427	1.66717	1.30242	3.31741	3.40282	5.0015	3.90725	78.4296	72.699	81.7519	77.6268	4.40668	4.92594	2.53581	3.95615	13.2201	14.7778	7.60743	11.8684	68.7307
12	43.5729	66.3289	47.335	52.4122	2.34999	3.8148	3.37799	3.18093	37.9586	57.0204	40.9088	45.2959	295.06	407.828	301.674	334.854	16.6814	58.8483	24.2414	33.257	8.15431	15.9606	11.033	11.716	63.8239	114.327	81.0516	86.4007	0.508739	1.07581	0.895392	0.826648	1.52622	3.22743	2.68618	2.47994	52.9239	84.8897	60.1087	65.9741	2.85873	4.89061	2.13669	3.29534	8.57618	14.6718	6.41007	9.88603	46.1129
13	63.3138	73.2871	56.7094	64.4368	3.25562	4.88255	3.23732	3.79183	55.7846	63.551	49.0518	56.1291	470.215	479.525	363.27	437.67	78.2021	76.9745	62.307	72.4945	25.1814	17.5767	23.3286	22.0289	212.722	133.081	172.645	172.816	1.47063	1.35313	1.52591	1.44989	4.41188	4.05938	4.57773	4.34967	91.8857	93.5456	83.6829	89.7047	4.72625	6.23568	2.38161	4.44785	14.1787	18.707	7.14484	13.3435	80.966
14	59.5433	51.3834	55.745	55.5572	3.11526	3.31801	3.65559	3.36295	52.1838	44.8805	48.4681	48.5108	422.481	355.13	371.311	382.974	68.3964	46.0066	70.7821	61.7284	24.3763	19.0617	25.3661	22.9347	197.986	150.362	194.04	180.796	1.45126	1.40479	1.93714	1.59773	4.35378	4.21438	5.81142	4.79319	87.345	73.2166	84.926	81.8292	4.56652	4.7228	2.79636	4.02856	13.6996	14.1684	8.38909	12.0857	76.5601
15	59.563	61.8253	48.5675	56.6519	3.32675	3.71057	3.19931	3.41221	52.1424	53.5491	42.7945	49.4953	419.143	402.48	363.688	395.104	77.1854	68.5276	51.217	65.6433	27.1771	22.2146	23.0289	24.1402	218.176	166.639	200.253	195.023	1.73059	1.54241	1.77583	1.68294	5.19177	4.62722	5.32749	5.04883	90.6134	87.4813	74.6226	84.2391	5.05734	5.25297	2.48757	4.26596	15.172	15.7589	7.46271	12.7979	79.3195
16	59.4675	70.9035	39.4781	56.6164	2.93649	4.2332	2.13675	3.10215	51.0578	61.6341	33.7152	48.8024	361.439	471.469	231.414	354.774	71.4521	79.9382	41.9869	64.4591	24.6627	20.2062	21.297	22.0553	174.638	154.633	147.153	158.808	1.41642	1.38495	1.34905	1.38347	4.24926	4.15484	4.04716	4.15042	88.191	94.1472	64.3877	82.242	4.35291	5.61814	1.7429	3.90465	13.0587	16.8544	5.22871	11.714	75.7205
17	52.9223	75.224	82.3191	70.1551	2.46538	4.5302	3.68544	3.56034	40.7501	63.3715	70.5951	58.2389	290.238	459.885	496.215	415.446	41.7818	83.5737	93.5458	72.9671	18.1452	18.2867	14.5629	16.9983	129.053	131.53	102.844	121.142	1.01969	1.34818	0.758937	1.04227	3.05907	4.04453	2.27681	3.1268	68.5423	95.5532	98.9346	87.6767	3.30129	6.02112	2.22219	3.8482	9.90387	18.0634	6.66657	11.5446	58.8953
18	66.1187	66.4344	58.9316	63.8282	3.71377	4.19559	3.56601	3.82512	58.3552	57.5378	50.959	55.6173	497.016	429.874	376.684	434.525	85.0118	73.8562	85.9939	81.6206	24.7665	20.8313	30.1348	25.2442	211.537	155.933	222.757	196.742	1.58999	1.52824	2.1061	1.74144	4.76997	4.58471	6.31829	5.22432	94.1696	90.4796	93.7809	92.81	5.30376	5.72382	2.83605	4.62121	15.9113	17.1715	8.50816	13.8636	83.1217
19	52.1599	70.832	43.8264	55.6061	2.97233	4.71394	2.99904	3.56177	46.1788	63.3458	38.4033	49.3093	402.778	601.683	310.652	438.371	51.2668	75.333	30.6578	52.4192	21.7906	18.7043	14.8335	18.4428	190.389	179.146	120.35	163.295	1.40052	1.40652	1.15347	1.32017	4.20157	4.21956	3.46041	3.96051	76.7673	91.7262	60.7474	76.4137	4.37285	6.12046	2.07625	4.18985	13.1185	18.3614	6.22876	12.5696	67.9694
20	55.4703	64.4288	44.7227	54.8739	2.80748	3.52867	2.36947	2.90187	48.9604	55.4654	38.762	47.7292	417.208	401.105	290.831	369.715	34.2623	64.1274	34.5149	44.3015	13.2638	19.5369	16.2358	16.3455	113.105	140.547	121.796	125.149	0.759395	1.23463	0.99386	0.995962	2.27818	3.70389	2.98158	2.98788	70.4964	87.1429	63.4557	73.6983	3.56688	4.7633	1.68166	3.33728	10.7006	14.2899	5.04499	10.0118	62.2242
21	66.6311	83.5582	55.2536	68.481	3.07768	5.10923	3.23315	3.80669	58.3376	73.0213	47.4917	59.6169	469.304	579.661	338.293	462.419	89.3994	87.3686	89.8662	88.8781	26.2486	12.5374	34.3597	24.3819	212.57	99.5685	244.827	185.655	1.38217	0.876511	2.35293	1.5372	4.1465	2.62953	7.05879	4.61161	96.5837	97.9038	95.227	96.5715	4.45985	5.98574	2.79304	4.41288	13.3795	17.9572	8.37913	13.2386	84.5861
22	58.4015	61.6547	44.0474	54.7012	3.68718	4.27106	2.97726	3.64517	51.9246	54.2271	38.5884	48.2467	468.582	450.78	313.082	410.815	73.026	65.862	44.3894	61.0925	25.6597	22.1398	20.5437	22.7811	231.965	183.96	163.862	193.262	1.81835	1.74794	1.5451	1.7038	5.45506	5.24382	4.63529	5.11139	87.2557	86.8288	67.5505	80.545	5.50553	6.019	2.26118	4.59524	16.5166	18.057	6.78354	13.7857	77.5844
23	51.8328	64.4915	47.1226	54.4823	2.28521	3.3542	2.27842	2.63928	44.7485	55.3345	40.493	46.8587	327.78	389.763	288.077	335.207	53.1295	64.757	58.6321	58.8395	21.9368	19.7753	25.8652	22.5258	160.435	139.374	184.658	161.489	1.12327	1.21604	1.43275	1.25735	3.3698	3.64812	4.29825	3.77206	77.2487	87.537	77.2048	80.6635	3.40848	4.57024	1.85558	3.2781	10.2254	13.7107	5.56675	9.8343	66.6853
24	48.9528	57.4952	46.3171	50.9217	2.67329	3.50594	2.91431	3.03118	42.6642	49.9745	39.9559	44.1982	332.632	382.176	291.049	335.285	39.1279	50.0543	44.7191	44.6337	17.0129	18.4726	20.1975	18.561	132.448	141.361	147.213	140.341	1.06363	1.29494	1.48959	1.28272	3.1909	3.88481	4.46878	3.84816	68.4774	78.7456	69.7278	72.3169	3.73692	4.80087	2.20195	3.57992	11.2108	14.4026	6.60586	10.7397	59.6771
25	48.7473	57.7705	52.0573	52.8584	3.08938	3.89262	3.64342	3.54181	43.9096	52.7153	45.8343	47.4864	442.457	690.139	385.988	506.195	30.7337	46.0643	42.885	39.8943	14.1864	16.0692	17.5146	15.9234	142.96	190.548	146.298	159.935	0.993629	1.20811	1.38605	1.19593	2.98089	3.62433	4.15816	3.5878	64.4966	75.5289	71.9714	70.6656	4.08301	5.10073	2.51474	3.89949	12.249	15.3022	7.54421	11.6985	58.0959
26	40.1676	56.8996	44.5497	47.2056	2.44068	2.62677	2.99595	2.6878	35.8458	47.6119	39.0761	40.8446	333.414	304.325	318.768	318.836	22.4066	42.7041	34.0048	33.0385	11.9431	14.2985	15.6909	13.9775	111.002	90.4755	127.13	109.536	0.80997	0.779965	1.20454	0.931492	2.42991	2.3399	3.61362	2.79448	53.5519	74.0199	62.456	63.3426	3.25065	3.40674	2.10024	2.91921	9.75196	10.2202	6.30073	8.75764	47.7889
27	51.7679	62.8636	59.0999	57.9105	2.87054	3.71452	3.60334	3.39613	45.0846	53.7298	50.3339	49.7161	350.356	370.958	339.841	353.718	70.4905	70.7413	91.998	77.7433	29.5685	22.0099	31.7182	27.7655	228.256	151.779	214.755	198.263	1.86881	1.51263	2.30848	1.89664	5.60644	4.53789	6.92545	5.68993	85.7555	88.6217	96.3234	90.2335	4.73935	5.22715	2.95591	4.30747	14.218	15.6814	8.86774	12.9224	74.653
28	48.6319	52.5179	50.9638	50.7045	2.59322	3.33304	2.85063	2.92563	42.9159	45.7758	44.297	44.3296	365.187	357.39	340.259	354.278	34.5428	38.5195	49.2017	40.7547	15.5209	15.9597	20.2394	17.24	132.124	124.968	154.44	137.178	0.938907	1.16098	1.3001	1.13333	2.81672	3.48295	3.90031	3.39999	66.219	70.8203	74.2735	70.4376	3.53212	4.49402	2.07537	3.36717	10.5964	13.4821	6.2261	10.1015	58.4368
29	54.5778	62.8238	65.6985	61.0333	2.982	3.59814	3.84446	3.47486	48.6631	54.9778	57.1221	53.5877	450.694	441.22	440.396	444.104	70.0072	71.4013	88.1975	76.5353	28.0041	22.3383	27.047	25.7965	258.333	178.091	217.119	217.848	1.7153	1.47301	1.84607	1.67812	5.1459	4.41902	5.5382	5.03437	86.0005	88.3749	96.6294	90.3349	4.69729	5.07114	2.84526	4.20457	14.0919	15.2134	8.53579	12.6137	76.6672
30	52.7654	48.7029	50.1125	50.527	2.40716	3.3915	2.71276	2.83714	46.3644	42.8769	43.1385	44.1266	382.54	373.016	309.979	355.178	44.769	34.8188	40.3552	39.981	18.4912	15.3217	17.1878	17.0002	152.91	132.593	123.513	136.339	0.953573	1.20735	1.08075	1.08056	2.86072	3.62205	3.24225	3.24167	73.8028	66.1191	70.0788	70.0002	3.36073	4.59885	1.89675	3.28544	10.0822	13.7965	5.69026	9.85633	64.8556
31	55.5889	44.6414	49.9561	50.0621	2.95429	2.81269	3.21359	2.99352	49.4583	38.979	43.8026	44.08	449.495	313.455	355.819	372.923	61.4823	28.9324	42.4352	44.2833	24.2609	13.7497	17.6748	18.5618	220.028	107.24	143.297	156.855	1.44898	0.976017	1.29613	1.24038	4.34694	2.92805	3.8884	3.72113	82.864	60.4587	70.1193	71.1473	4.40327	3.78871	2.25486	3.48228	13.2098	11.3661	6.76458	10.4468	73.7192
32	76.6158	68.6606	51.0462	65.4409	4.27456	6.37481	3.00712	4.55216	68.7995	62.7678	44.5473	58.7049	674.603	815.196	350.443	613.414	73.9653	67.2852	83.6115	74.954	15.3634	19.3195	35.7221	23.4683	150.794	218.321	282.068	217.061	0.95888	1.76837	2.41369	1.71365	2.87664	5.3051	7.24108	5.14094	93.7228	90.0198	91.9575	91.9	5.23344	8.14318	2.7104	5.36234	15.7003	24.4295	8.13121	16.087	84.1629
33	59.0999	57.1787	53.5314	56.6033	3.04582	3.73912	3.3135	3.36615	52.0483	49.8867	46.2672	49.4007	436.359	392.419	342.045	390.274	81.8296	54.1836	57.5329	64.5154	29.5055	19.94	22.9781	24.1412	247.744	158.1	169.733	191.859	1.71343	1.51417	1.60781	1.61181	5.14028	4.54252	4.82344	4.83542	92.596	80.0055	80.1208	84.2408	4.75925	5.25329	2.46066	4.15773	14.2777	15.7599	7.38197	12.4732	81.5539
34	68.9668	63.9674	54.5896	62.5079	3.82591	4.21998	3.04745	3.69778	60.4171	55.235	47.282	54.3114	487.476	404.673	353.775	415.308	84.0071	67.7308	83.2135	78.3171	22.7971	20.8189	33.1117	25.5759	183.767	152.649	248.909	195.108	1.44063	1.58734	2.17493	1.7343	4.3219	4.76201	6.5248	5.2029	94.9933	88.0746	92.7902	91.9527	5.26655	5.80732	2.61119	4.56169	15.7996	17.422	7.83357	13.6851	83.2142
35	61.9067	62.8173	46.825	57.183	3.15495	3.78312	2.569	3.16902	53.3631	54.1563	39.7053	49.0749	387.487	392.793	261.259	347.18	69.3105	54.2191	41.4719	55.0005	21.943	17.2763	17.9686	19.0626	160.191	125.225	118.296	134.571	1.29258	1.20933	1.16179	1.22123	3.87775	3.62798	3.48536	3.6637	87.342	82.8586	68.0136	79.4047	4.44754	4.99245	1.86539	3.76846	13.3426	14.9773	5.59617	11.3054	75.3061
36	68.4724	67.0309	51.6355	62.3796	3.79333	4.96693	3.02411	3.92812	60.1905	58.6472	44.7643	54.534	499.223	470.188	336.574	435.328	84.7664	72.8911	59.335	72.3309	23.0355	20.6607	24.745	22.8137	189.708	166.763	185.536	180.669	1.42114	1.76884	1.67925	1.62308	4.26341	5.30653	5.03776	4.86923	94.7037	90.6215	80.1911	88.5055	5.21447	6.73577	2.35168	4.76731	15.6434	20.2073	7.05505	14.3019	83.226
37	81.5546	69.2434	44.0616	64.9532	4.18197	4.38028	2.25427	3.60551	70.3853	60.2248	37.6685	56.0929	515.957	462.588	261.341	413.296	92.1429	75.6386	39.4979	69.0931	14.6	19.8206	17.7032	17.3746	107.839	152.103	121.711	127.218	0.869271	1.4357	1.0492	1.11806	2.60781	4.30709	3.14759	3.35417	98.4527	92.0352	64.8015	85.0965	5.05124	5.81598	1.65173	4.17298	15.1537	17.4479	4.95519	12.519	84.9853
38	79.1667	72.5756	67.5533	73.0985	3.60775	4.05309	3.53382	3.73155	64.5524	58.518	58.2861	60.4522	544.259	379.612	427.529	450.467	82.684	85.4394	87.277	85.1334	20.0454	22.0415	23.3737	21.8202	164.074	144.085	176.608	161.589	1.02279	1.45335	1.38701	1.28772	3.06837	4.36005	4.16104	3.86315	96.1705	95.2508	94.5251	95.3155	4.31218	5.31282	2.46042	4.02847	12.9365	15.9384	7.38125	12.0854	84.5978
39	70.6677	61.7515	50.075	60.8314	3.5421	4.03038	3.02782	3.53343	61.8076	53.6822	42.973	52.8209	501.216	410.96	303.983	405.386	80.4313	66.4749	58.1728	68.3597	21.3938	21.7187	23.8796	22.3307	181.052	166.38	168.113	171.849	1.23807	1.63103	1.68076	1.51662	3.71421	4.89308	5.04229	4.54986	94.965	86.7324	77.9223	86.5399	4.78017	5.66141	2.35429	4.26529	14.3405	16.9842	7.06287	12.7959	83.2014
40	71.2455	73.1717	46.1687	63.5286	3.46867	4.51708	2.4282	3.47132	62.1159	63.259	39.6363	55.0037	485.356	471.059	280.476	412.297	75.9903	77.1956	38.3937	63.8599	18.7746	17.9178	16.7701	17.8208	145.636	134.062	118.473	132.724	1.05755	1.28733	1.0207	1.12186	3.17265	3.862	3.06209	3.36558	92.8018	93.8799	65.7079	84.1299	4.52622	5.80441	1.72445	4.01836	13.5787	17.4132	5.17335	12.0551	80.8905
41	52.6628	62.3244	37.0569	50.6814	3.63852	5.95356	2.49693	4.02967	46.8558	55.2819	31.953	44.6969	426.973	489.698	237.922	384.865	32.172	51.829	24.7781	36.2597	13.5083	16.7914	13.4173	14.5723	122.427	148.571	101.154	124.051	1.04546	1.8173	1.02859	1.29711	3.13637	5.4519	3.08576	3.89134	67.8559	86.2167	52.5805	68.8844	4.68398	6.61779	1.76276	4.35484	14.0519	19.8534	5.28828	13.0645	60.3641
42	89.845	55.8373	66.3876	70.69	5.58617	3.78433	4.81809	4.72953	79.8374	48.3189	56.9498	61.7021	716.886	359.491	405.07	493.816	71.4504	74.8863	92.7778	79.7048	6.79675	28.4293	25.8703	20.3654	61.1842	211.991	178.664	150.613	0.472314	2.23417	2.42077	1.70909	1.41694	6.70251	7.26231	5.12726	97.4913	88.6783	96.7128	94.2941	6.05849	6.0185	3.61943	5.23214	18.1755	18.0555	10.8583	15.6964	86.6342
43	81.8578	41.9482	40.2307	54.6789	3.62098	2.51564	1.99043	2.70902	72.4385	36.7948	34.9246	48.0527	630.152	300.8	266.044	398.999	65.8392	34.3377	37.9042	46.0271	12.2299	17.398	19.7286	16.4522	107.576	142.555	149.214	133.115	0.629833	1.18862	1.17037	0.996275	1.8895	3.56587	3.51111	2.98883	95.6589	61.7763	62.9795	73.4716	4.25081	3.70426	1.5804	3.17849	12.7524	11.1128	4.7412	9.53547	84.6685
44	85.4701	58.5118	47.7249	63.9023	4.379	3.65659	2.35829	3.46463	74.0741	51.5842	41.2099	55.6227	555.556	438.03	303.592	432.392	94.1176	58.3702	59.3584	70.6154	11.8519	19.4128	25.4744	18.913	88.8889	167.159	185.807	147.285	0.728597	1.39541	1.45291	1.19231	2.18579	4.18624	4.35873	3.57692	99.1453	80.4897	77.2734	85.6361	5.28233	5.052	1.9056	4.07998	15.847	15.156	5.7168	12.2399	85.9259
45	56.1572	51.8204	50.8344	52.9373	3.22408	3.43278	2.83451	3.16379	49.7714	46.1449	44.2956	46.7373	439.234	422.623	344.84	402.232	47.2638	40.8548	47.1664	45.095	17.5234	17.5321	20.037	18.3642	154.061	160.689	155.399	156.716	1.12772	1.30082	1.28071	1.23642	3.38315	3.90246	3.84214	3.70925	75.9386	71.5071	73.8419	73.7625	4.3518	4.7336	2.05761	3.71434	13.0554	14.2008	6.17283	11.143	67.2948
46	49.3473	53.4853	43.633	48.8219	2.68432	3.25222	2.67689	2.87114	43.9803	46.9262	37.9847	42.9637	404.632	383.26	293.715	360.536	31.8461	41.8243	34.6926	36.121	14.2206	16.7853	16.7333	15.9131	130.877	137.432	128.874	132.394	0.868786	1.16607	1.16411	1.06632	2.60636	3.49821	3.49234	3.19897	65.3026	72.6103	62.8658	66.9262	3.5531	4.41829	1.9205	3.2973	10.6593	13.2549	5.7615	9.8919	58.2009
47	67.422	57.1748	47.5574	57.3847	3.43167	3.66837	3.05731	3.38578	60.2417	50.0902	42.0833	50.8051	573.016	404.529	365.926	447.823	89.6108	57.2658	49.0604	65.3123	25.7587	21.4883	21.7758	23.0076	238.095	173.737	188.519	200.117	1.46876	1.57522	1.59913	1.5477	4.40629	4.72566	4.79738	4.64311	96.3423	81.6984	72.1799	83.4069	4.90044	5.24359	2.32822	4.15741	14.7013	15.7308	6.98465	12.4722	86.0004
48	58.1194	50.1082	52.0304	53.4193	2.8048	3.33581	2.7523	2.9643	51.9122	43.9524	44.8994	46.9214	507.648	359.281	327.668	398.199	55.102	43.818	58.7434	52.5545	20.5352	18.8202	23.9192	21.0915	200.707	153.281	174.359	176.116	1.10967	1.42738	1.45685	1.3313	3.32901	4.28213	4.37055	3.9939	81.1124	71.5753	79.7535	77.4804	3.91447	4.76318	2.10457	3.59407	11.7434	14.2895	6.31372	10.7822	72.4474
49	56.3715	45.3764	57.4148	53.0542	2.81023	3.08236	3.07662	2.98974	47.9198	39.8057	49.8254	45.8503	322.336	325.538	382.955	343.61	47.9748	41.087	49.8621	46.308	17.74	19.2332	17.3539	18.109	119.159	156.183	132.413	135.918	1.03855	1.48672	1.06602	1.1971	3.11565	4.46017	3.19805	3.59129	77.2461	67.323	77.4337	74.001	3.84877	4.56909	2.07132	3.49639	11.5463	13.7073	6.21395	10.4892	65.6598
50	57.4996	68.7375	48.0055	58.0809	3.58045	4.57256	3.04632	3.73311	50.7307	59.7043	41.5505	50.6619	432.155	454.796	309.843	398.931	65.9906	75.8626	72.5597	71.471	24.6543	20.5836	32.1275	25.7885	209.371	156.13	240.967	202.156	1.72524	1.5458	2.30594	1.85899	5.17571	4.6374	6.91782	5.57698	85.4541	92.4511	85.0891	87.6648	5.30569	6.11836	2.67613	4.70006	15.9171	18.3551	8.0284	14.1002	75.385
51	66.4319	63.4268	45.1612	58.34	3.55573	3.52236	2.77129	3.28313	59.1658	54.4758	39.3121	50.9846	541.754	395	303.543	413.432	93.5462	73.5988	64.9224	77.3558	27.7079	22.9853	30.5765	27.0899	250.658	167.287	235.762	217.902	1.70659	1.48494	2.17279	1.78811	5.11978	4.45482	6.51837	5.36432	97.5887	90.1707	80.2943	89.3512	5.26233	5.00729	2.47204	4.24722	15.787	15.0219	7.41611	12.7417	86.8737
52	51.2492	63.3894	39.4063	51.3483	2.57311	3.44945	2.21343	2.74533	44.6337	53.9561	33.6121	44.0673	346.571	362.724	229.807	313.034	44.6545	57.2987	33.9061	45.2864	18.8913	17.4242	17.065	17.7935	146.381	117.266	117	126.882	1.08815	1.11497	1.1207	1.10794	3.26446	3.3449	3.36211	3.32382	72.9471	83.8558	59.4036	72.0689	3.66126	4.56441	1.66707	3.29758	10.9838	13.6932	5.0012	9.89274	63.5251
53	45.3704	44.1593	47.6075	45.7124	2.46368	2.38002	2.6845	2.5094	39.4956	37.7116	40.8934	39.3669	306.127	258.43	290.325	284.961	39.5966	27.489	45.9731	37.6862	18.6941	13.0025	19.2412	16.9792	144.791	89.0646	137.576	123.81	1.16514	0.818445	1.28041	1.088	3.49541	2.45534	3.84124	3.264	66.8478	59.386	69.9816	65.4051	3.62882	3.19847	1.98246	2.93658	10.8864	9.59541	5.94737	8.80974	58.1897
54	47.3448	49.1014	37.179	44.5417	2.64759	2.78842	2.7141	2.7167	41.7429	42.3399	31.9706	38.6845	353.098	307.498	229.84	296.812	54.278	35.2906	36.5364	42.035	25.2282	15.4819	19.0157	19.9086	212.913	112.494	133.936	153.115	1.59738	1.02082	1.50372	1.37397	4.79214	3.06247	4.51116	4.12192	75.9671	67.0543	59.3675	67.463	4.24497	3.80924	2.10891	3.38771	12.7349	11.4277	6.32673	10.1631	66.9711
55	72.9412	62.881	46.5174	60.7798	4.49077	3.99904	2.85695	3.78225	64.3395	55.2261	40.6068	53.3908	545.891	454.105	320.622	440.206	82.1745	75.5808	61.8403	73.1985	19.8042	24.5475	28.8505	24.4007	167.473	202.222	226.99	198.895	1.36073	1.7762	2.02205	1.71966	4.08219	5.32859	6.06614	5.15897	95.4032	90.8236	79.5853	88.604	5.8515	5.77524	2.4395	4.68875	17.5545	17.3257	7.3185	14.0662	84.1437
56	51.0219	52.6152	39.8417	47.8263	2.6218	3.49175	2.31871	2.81075	44.6739	46.4875	34.1775	41.7796	359.776	399.889	240.658	333.441	39.6461	51.1504	32.4004	41.0656	16.9164	21.0505	16.0591	18.0087	136.388	181.119	113.704	143.737	0.990069	1.58215	1.11165	1.22796	2.97021	4.74646	3.33496	3.68388	70.3388	76.4403	58.5449	68.4413	3.61187	5.0739	1.71518	3.46698	10.8356	15.2217	5.14555	10.401	61.5903
57	65.4482	62.0492	49.3622	58.9532	3.57058	3.55232	2.82909	3.31733	56.7026	53.5262	41.9151	50.7147	424.352	389.783	278.441	364.192	83.3558	67.5129	87.4551	79.4413	24.8834	21.2457	37.6827	27.9372	186.322	154.519	248.797	196.546	1.55071	1.40942	2.57937	1.8465	4.65213	4.22826	7.73812	5.5395	94.1672	86.6827	93.7862	91.5453	5.12129	4.96174	2.70423	4.26242	15.3639	14.8852	8.11269	12.7873	81.5861
58	66.824	63.2233	58.5839	62.8771	3.40661	4.34784	3.56423	3.77289	58.9139	54.6474	51.0298	54.8637	498.796	405.282	396.241	433.44	87.5845	75.4661	84.0067	82.3524	25.3979	23.9932	29.6853	26.3588	211.376	177.653	229.919	206.316	1.4553	1.91748	2.10335	1.82538	4.36589	5.75244	6.31006	5.47613	95.7013	90.9881	92.6766	93.122	4.86191	6.26532	2.83379	4.65367	14.5857	18.796	8.50137	13.961	84.3118
59	53.6005	55.3575	53.5045	54.1542	2.99801	3.89296	3.28788	3.39295	46.7415	48.8676	46.4925	47.3672	365.286	420.665	355.144	380.365	63.7011	52.8245	62.3971	59.6409	25.4845	20.4702	23.7705	23.2418	199.377	175.96	181.506	185.614	1.63841	1.6299	1.68013	1.64948	4.91523	4.88969	5.0404	4.94844	82.82	78.5511	80.8617	80.7443	4.63642	5.52286	2.48401	4.21443	13.9093	16.5686	7.45202	12.6433	72.226
60	52.4821	56.9918	40.5471	50.007	2.84641	3.39791	2.19166	2.81199	45.774	49.6378	35.0034	43.4717	365.812	384.933	256.023	335.589	55.4694	43.3491	26.9321	41.9169	22.865	16.234	13.8222	17.6404	183.686	125.439	101.092	136.739	1.43128	1.11544	0.866435	1.13772	4.29384	3.34631	2.5993	3.41315	78.6758	75.641	56.5585	70.2918	4.27769	4.51335	1.52905	3.44003	12.8331	13.54	4.58715	10.3201	68.639
61	48.8367	56.5447	36.8885	47.4233	3.00863	3.89371	2.47591	3.12608	43.123	49.8825	32.0554	41.687	369.603	426.175	245.278	347.019	46.9944	44.7139	29.6483	40.4522	21.1487	16.7507	16.2371	18.0455	180.45	142.885	123.948	149.094	1.47846	1.31146	1.25241	1.34744	4.43537	3.93438	3.75722	4.04232	72.802	75.5362	55.5805	67.9729	4.48708	5.20517	1.86416	3.85214	13.4613	15.6155	5.59247	11.5564	64.2717
62	49.7755	60.5706	45.8271	52.0577	2.34486	3.68759	2.33578	2.78941	44.5992	52.968	39.5949	45.7207	455.682	424.242	292.123	390.682	37.2447	50.108	38.9786	42.1104	16.5513	17.2917	18.2207	17.3546	167.664	139.596	134.715	147.325	0.871404	1.21494	1.08133	1.05589	2.61421	3.64483	3.24398	3.16767	68.2637	80.3228	66.9095	71.832	3.21627	4.90253	1.70855	3.27578	9.6488	14.7076	5.12566	9.82735	61.1504
63	59.8234	63.1549	63.4499	62.1428	3.12821	3.72304	3.35015	3.40047	51.9522	53.9196	53.9948	53.2889	395.556	369.011	363.313	375.96	79.2887	57.0509	85.975	74.1049	27.0373	17.5908	26.0115	23.5465	206.627	120.555	178.58	168.587	1.63794	1.21634	1.64486	1.49971	4.91381	3.64902	4.93459	4.49914	90.9401	83.7538	93.9058	89.5332	4.76615	4.93938	2.49751	4.06768	14.2985	14.8181	7.49253	12.203	78.9895
64	58.1183	53.7524	48.7239	53.5315	2.57276	3.02665	2.93761	2.84567	50.7149	46.7868	41.5256	46.3424	398.586	364.863	281.158	348.202	47.2676	35.4118	42.0561	41.5785	17.2347	13.8825	17.9155	16.3443	135.833	108.273	121	121.702	0.871408	0.897993	1.28041	1.0166	2.61422	2.69398	3.84124	3.04981	77.8608	69.7023	69.7541	72.439	3.44417	3.92464	2.10901	3.15927	10.3325	11.7739	6.32703	9.47782	67.9496
65	60.2098	61.8826	62.9267	61.673	3.62279	3.78799	3.42704	3.61261	54.1424	54.8359	53.9294	54.3025	538.614	481.682	378.898	466.398	48.8776	52.7023	66.412	55.9973	17.0114	17.7556	21.1604	18.6425	169.468	156.006	149.89	158.455	1.13901	1.22532	1.35272	1.23902	3.41703	3.67595	4.05816	3.71705	79.1248	81.9193	87.5849	82.8763	4.7618	5.01331	2.38988	4.055	14.2854	15.0399	7.16964	12.165	71.1537
66	68.3937	64.3818	47.5569	60.1108	3.01312	3.93085	2.8604	3.26812	66.6404	59.7534	40.9682	55.7873	478.625	473.339	297.147	416.371	82.779	80.3975	41.0362	68.0709	14.7038	21.7299	18.3064	18.2467	104.451	172.2	131.324	135.992	0.760412	1.5509	1.30328	1.20486	2.28123	4.65269	3.90984	3.61459	94.5389	93.2899	68.8422	85.557	4.27434	5.8473	2.08184	4.06783	12.823	17.5419	6.24552	12.2035	81.3442
67	73.2586	57.9378	62.13	64.4421	3.81008	3.53231	3.1982	3.51353	63.5284	49.2574	53.6939	55.4933	478.571	332.024	395.528	402.041	88.7311	66.7159	85.1587	80.2019	20.3339	23.6184	27.9673	23.9732	152.513	158.506	206.281	172.434	1.2282	1.6939	1.6303	1.51747	3.6846	5.0817	4.89089	4.5524	96.7228	85.7411	94.4854	92.3164	5.03828	5.22621	2.41425	4.22625	15.1149	15.6786	7.24275	12.6787	83.8623
69	52.0285	57.0096	56.3294	55.1225	2.45716	3.53011	3.33392	3.10706	45.8268	49.6437	48.8367	48.1024	384.722	387.975	367.4	380.032	52.8945	57.1229	71.1255	60.381	21.5645	21.2365	25.5276	22.7762	180.952	164.98	190.164	178.699	1.15458	1.50712	1.70465	1.45545	3.46373	4.52136	5.11396	4.36635	76.5128	81.4176	85.8177	81.2494	3.61173	5.03723	2.51929	3.72275	10.8352	15.1117	7.55786	11.1682	67.3913
70	71.5782	61.1345	69.1643	67.2923	3.38215	3.52144	3.62165	3.50841	61.7943	50.6081	58.4107	56.9377	454.167	294.076	376.224	374.822	89.6713	78.3562	95.0974	87.7083	21.9325	25.1321	25.3154	24.1267	163.69	146.167	165.897	158.585	1.21646	1.74789	1.59814	1.52083	3.64939	5.24367	4.79443	4.5625	96.9175	91.4885	98.6041	95.67	4.59861	5.26933	2.60989	4.15928	13.7958	15.808	7.82968	12.4778	83.7267
71	52.8604	45.7956	54.8142	51.1568	2.80684	2.69151	3.29913	2.93249	46.5532	39.881	47.8775	44.7706	390.208	308.973	378.788	359.323	41.3176	40.197	55.9199	45.8115	16.9847	18.6576	21.5137	19.052	142.439	144.312	169.623	152.125	1.02774	1.26323	1.49498	1.26198	3.08322	3.78969	4.48494	3.78595	72.1448	67.2256	79.4569	72.9424	3.83457	3.95473	2.39705	3.39545	11.5037	11.8642	7.19116	10.1864	63.5378
72	66.0198	58.4724	58.6306	61.0409	3.26868	4.3535	2.9624	3.52819	57.3362	51.3621	49.6899	52.7961	436.97	422.65	325.871	395.163	68.6077	51.2166	64.7272	61.5172	19.7638	18.4554	21.6525	19.9572	149.697	152.081	141.822	147.867	1.13499	1.56806	1.31714	1.34006	3.40498	4.70418	3.95141	4.02019	88.7969	79.4785	84.1848	84.1534	4.40367	5.92156	2.13977	4.155	13.211	17.7647	6.41931	12.465	77.1
80	76.7554	66.9948	77.1341	73.6281	3.33287	4.01169	4.00933	3.78463	66.6354	57.6663	66.3756	63.5591	506.285	419.652	476.218	467.385	84.6525	93.4809	82.2563	86.7966	16.0506	26.2865	15.9492	19.4288	122.168	189.413	115.73	142.437	0.816157	1.8261	1.00367	1.21531	2.44847	5.47831	3.01102	3.64593	95.2381	97.5826	95.485	96.1019	4.14903	5.83779	2.5065	4.16444	12.4471	17.5134	7.5195	12.4933	82.6861
86	56.3544	60.7983	67.6469	61.5999	3.49816	4.01672	3.88637	3.80041	49.6434	53.0644	58.7418	53.8165	419.713	417.991	446.881	428.195	56.0419	69.3407	86.9634	70.782	21.3105	23.6315	24.1197	23.0206	180.015	186.486	184.429	183.644	1.50422	1.78853	1.59938	1.63071	4.51266	5.36559	4.79815	4.89213	80.5487	87.867	95.4018	87.9392	5.00238	5.80525	2.74287	4.51683	15.0071	17.4157	8.22862	13.5505	70.9539
87	65.9032	68.3853	59.4587	64.5824	3.07804	3.97561	3.2018	3.41848	57.7721	58.9331	50.7287	55.8113	485.661	426.533	345.632	419.275	69.1185	65.3305	70.1683	68.2057	19.0488	17.7947	23.4904	20.1113	162.751	129.201	160.27	150.741	1.02571	1.1732	1.47737	1.22543	3.07714	3.51961	4.4321	3.67628	87.5808	89.0236	86.9851	87.8632	4.10375	5.14881	2.33958	3.86405	12.3113	15.4464	7.01874	11.5921	76.821
88	79.953	62.6633	59.0272	67.2145	3.47482	4.15728	2.78405	3.47205	69.0493	53.3433	49.3954	57.2627	506.502	359.298	305.334	390.378	96.1058	61.6583	64.2857	74.0166	16.1681	19.5891	24.4071	20.0548	117.987	131.643	155.735	135.121	0.836098	1.51996	1.38643	1.2475	2.50829	4.55987	4.1593	3.74249	98.6893	85.6843	87.7816	90.7184	4.31092	5.67723	2.08524	4.02447	12.9328	17.0317	6.25573	12.0734	85.2174
90	69.2266	66.2183	65.2281	66.891	3.03734	4.04536	3.53661	3.53977	61.7718	57.6849	56.5397	58.6655	575.595	448.697	427.527	483.94	81.2855	64.8304	74.6998	73.6052	21.9139	18.1185	21.3319	20.4548	205.556	140.491	158.655	168.234	1.08077	1.26603	1.31595	1.22092	3.2423	3.79808	3.94786	3.66275	93.7664	87.0265	89.9023	90.2318	4.11811	5.31139	2.42628	3.95193	12.3543	15.9342	7.27885	11.8558	83.6857
91	63.2152	56.2757	50.6317	56.7075	3.22798	3.80004	2.71631	3.24811	55.1131	48.6018	43.5742	49.0963	430.437	356.719	315.165	367.44	82.9222	47.0049	65.7533	65.2268	26.3067	17.7127	27.6804	23.8999	205.176	129.734	194.236	176.382	1.54841	1.38164	1.73614	1.5554	4.64522	4.14492	5.20843	4.66619	93.395	76.792	82.9465	84.3778	4.77639	5.18168	2.22623	4.06143	14.3292	15.545	6.67869	12.1843	81.4198
92	56.9306	61.544	48.9435	55.806	2.83697	4.08369	2.96431	3.29499	50.4196	54.0002	42.397	48.939	442.349	441.068	318.219	400.545	57.9505	56.422	53.4188	55.9305	21.3481	18.8954	23.191	21.1448	187.439	154.368	171.538	171.115	1.20495	1.42951	1.67287	1.43578	3.61485	4.28854	5.0186	4.30733	81.0329	83.0783	75.7743	79.9618	4.04192	5.51321	2.31859	3.95791	12.1258	16.5396	6.95577	11.8737	71.7677
93	78.9335	63.8426	53.291	65.3557	3.23825	5.20436	2.4754	3.63934	68.857	55.8533	44.5769	56.429	539.387	451.755	273.863	421.668	80.5014	44.4511	38.0287	54.3271	14.5827	14.0962	14.8176	14.4989	114.248	112.606	90.7351	105.863	0.686014	1.23081	0.82117	0.912666	2.05804	3.69244	2.46351	2.738	95.65	79.9789	71.0148	82.2145	3.92426	6.43518	1.64828	4.00257	11.7728	19.3055	4.94485	12.0077	83.4397
94	72.7332	63.6867	44.9843	60.4681	3.36146	4.4088	3.12194	3.63073	63.6341	56.0709	38.751	52.8187	525.866	468.997	280.615	425.159	76.641	54.2243	33.3762	54.7472	17.22	16.98	15.8116	16.6705	145.551	142.011	115.131	134.231	1.0667	1.33326	1.2785	1.22615	3.2001	3.99979	3.83549	3.67846	92.3786	82.9733	63.3236	79.5585	5.23644	5.73349	2.20022	4.39005	15.7093	17.2005	6.60065	13.1701	80.8541
96	69.7131	59.1037	49.1283	59.315	3.48565	4.00314	2.94226	3.47702	60.837	52.0221	42.4397	51.7663	479.66	434.709	311.942	408.77	80.8753	44.6563	33.0859	52.8725	21.3871	16.0171	14.5744	17.3262	170.107	133.456	107.4	136.988	1.22855	1.22686	1.02342	1.15961	3.68564	3.68059	3.07027	3.47884	94.1881	77.3084	65.9927	79.1631	4.71419	5.23001	1.98284	3.97568	14.1426	15.69	5.94852	11.927	82.2241
97	58.23	63.3214	52.4395	57.997	2.8887	3.66279	2.9316	3.16103	51.5967	55.1768	45.4035	50.7257	467.614	436.885	338.938	414.479	65.015	52.8655	55.984	57.9548	23.7171	16.8138	22.8482	21.1263	217.424	132.046	170.769	173.413	1.33173	1.11031	1.47969	1.30725	3.9952	3.33093	4.43908	3.92174	84.9622	82.6437	78.8234	82.1431	4.22043	4.7731	2.20565	3.73306	12.6613	14.3193	6.61694	11.1992	75.3137
98	59.9177	57.0582	36.9741	51.3167	3.6301	3.50991	2.43657	3.1922	52.395	50.2887	32.3078	44.9972	421.416	426.91	256.056	368.127	51.2028	43.9504	27.7093	40.9542	17.9853	16.6243	15.1962	16.602	144.813	140.373	120.404	135.197	1.24341	1.1517	1.15853	1.18454	3.73022	3.4551	3.47558	3.55363	80.4837	75.9343	54.3657	70.2612	4.87351	4.66161	1.79755	3.77756	14.6205	13.9848	5.39265	11.3327	70.3804
99	77.9109	50.2042	47.5706	58.5619	3.99806	2.71288	2.68726	3.13273	67.7034	43.5298	40.9651	50.7328	517.907	327.579	300.24	381.909	75.5688	37.337	72.0673	61.6577	14.0984	15.9349	31.546	20.5264	107.772	119.867	219.057	148.898	0.82775	0.991206	2.06689	1.29528	2.48325	2.97362	6.20067	3.88584	94.1354	68.5836	84.5661	82.4284	4.82581	3.70409	2.37707	3.63566	14.4774	11.1123	7.13122	10.907	81.8018
102	83.0128	70.2595	41.9745	65.0823	4.40754	4.74144	3.11453	4.08784	74.2583	62.7908	37.0163	58.0218	704.643	592.838	313.612	537.031	85.1198	80.0559	29.4728	64.8828	13.0018	20.6125	14.9622	16.1921	122.891	194.382	126.69	147.988	0.765106	1.57397	1.20609	1.18172	2.29532	4.7219	3.61826	3.54516	97.5542	93.327	58.942	83.2744	5.17265	6.31541	2.16031	4.54946	15.5179	18.9462	6.48092	13.6484	87.2602
104	92.0488	56.9945	59.8392	69.6275	5.03016	4.65258	3.41575	4.36616	81.1599	50.4331	51.2359	60.9429	687.82	439.64	359.81	495.757	80.0177	71.41	62.0559	71.1612	5.19103	26.999	23.0621	18.4174	45.4023	235.411	169.695	150.169	0.313679	2.48806	1.55978	1.45384	0.941037	7.46417	4.67935	4.36152	97.9109	87.5054	86.4437	90.62	5.34384	7.14064	2.48777	4.99075	16.0315	21.4219	7.4633	14.9722	86.3509
105	90.4429	66.1195	59.5891	72.0505	4.66398	4.05635	3.1514	3.95725	79.1271	57.3738	51.7881	62.763	632.5	438.989	398.281	489.923	65.8333	89.5851	57.1175	70.8453	6.0127	26.2263	14.7335	15.6575	47.7778	198.803	110.283	118.955	0.364329	1.84996	0.896856	1.03705	1.09299	5.54987	2.69057	3.11114	97.3213	96.3906	76.6129	90.1082	5.02831	5.90631	2.02413	4.31958	15.0849	17.7189	6.07238	12.9587	85.1398
114	77.4123	62.7028	49.7674	63.2942	4.84851	4.37503	3.11414	4.11256	68.1122	55.2578	42.9347	55.4349	567.396	465.612	316.855	449.954	90.9201	86.3514	65.0615	80.7777	18.1281	28.2836	24.2365	23.5494	150.517	238.497	174.83	187.948	1.27722	2.24991	1.76179	1.76297	3.83165	6.74974	5.28537	5.28892	98.0248	94.7942	77.9709	90.2633	6.12573	6.62494	1.62531	4.79199	18.3772	19.8748	4.87593	14.376	86.2403
115	47.4357	59.1351	59.2271	55.2659	2.74313	3.75657	3.72492	3.40821	42.2315	52.1554	52.1777	48.8549	386.562	441.975	452.077	426.871	23.9301	44.843	64.9215	44.5649	11.1511	15.9491	14.8047	13.9683	101.956	135.133	140.377	125.822	0.724725	1.14627	1.59763	1.15621	2.17418	3.43881	4.7929	3.46863	59.9626	77.219	75.3187	70.8335	3.46785	4.90284	2.37934	3.58334	10.4036	14.7085	7.13802	10.75	53.3826
124	71.0458	52.9618	45.4534	56.487	3.53004	3.62935	2.88022	3.34654	62.5251	47.3077	39.7033	49.8454	523.016	443.571	314.215	426.934	86.0447	47.636	33.8695	55.85	21.8866	19.8242	16.3379	19.3496	183.73	185.595	129.479	166.268	1.23593	1.5189	1.20102	1.31862	3.70779	4.55669	3.60306	3.95585	95.9029	75.1592	64.1546	78.4056	4.76597	5.14825	2.04062	3.98495	14.2979	15.4447	6.12186	11.9548	84.4117
127	58.06	68.8933	55.6785	60.8773	2.72195	3.71464	3.05629	3.16429	50.7629	57.7494	47.1067	51.873	405.263	357.326	306.56	356.383	70.6113	68.9437	65.8401	68.4651	25.9011	17.0578	24.1123	22.3571	206.579	105.918	157.931	156.809	1.3885	1.097	1.57078	1.35209	4.1655	3.291	4.71235	4.05628	87.6892	89.2286	84.144	87.0206	4.11045	4.81164	2.31354	3.74521	12.3314	14.4349	6.94061	11.2356	76.6641
128	73.3142	56.1408	49.268	59.5743	2.92197	2.7729	2.54164	2.7455	63.5044	47.5076	41.5901	50.8674	475.182	320.498	266.948	354.209	89.3693	55.2814	74.7862	73.1456	20.4616	19.2471	32.0978	23.9355	154.559	119.031	206.224	159.938	0.938612	1.04227	1.97059	1.31716	2.81584	3.12682	5.91176	3.95147	96.9031	79.3444	87.2844	87.844	3.86058	3.81517	2.25611	3.31062	11.5817	11.4455	6.76834	9.93186	83.966
143	59.7862	57.605	40.6304	52.6739	3.86926	4.07762	2.77134	3.57274	53.7617	51.2276	36.2152	47.0682	533.857	466.019	333.287	444.388	78.6381	51.2939	35.8695	55.2672	28.33	19.1636	18.513	22.0022	281.806	174.656	170.28	208.914	2.0376	1.5277	1.41814	1.66115	6.1128	4.5831	4.25442	4.98344	91.2847	79.1498	61.4018	77.2788	5.90686	5.60532	2.09474	4.53564	17.7206	16.816	6.28423	13.6069	82.0917
144	91.9551	75.9062	87.413	85.0914	4.80793	4.66503	5.36534	4.9461	81.3772	66.7062	77.2244	75.1026	708.206	550.487	664.186	640.96	88.8889	91.9613	96.3572	92.4025	6.47235	19.8229	10.7865	12.3606	56.8095	162.511	93.9454	104.422	0.367511	1.4197	0.738464	0.841892	1.10253	4.2591	2.21539	2.52568	99.2607	98.4833	99.6013	99.1151	5.17544	6.08473	3.0519	4.77069	15.5263	18.2542	9.15571	14.3121	87.8496
146	58.7381	60.8823	53.5341	57.7182	3.08291	3.4964	2.91451	3.16461	52.2162	53.2275	46.4257	50.6231	470.342	423.64	350.816	414.932	58.4249	59.0526	72.0632	63.1802	21.4559	19.9922	28.8231	23.4237	193.231	159.025	214.898	189.051	1.26718	1.31415	1.83192	1.47108	3.80153	3.94246	5.49576	4.41325	82.8745	83.7516	86.8414	84.4892	4.35009	4.81055	2.37321	3.84462	13.0503	14.4316	7.11964	11.5339	73.6721
CS	50.1534	55.1959	45.3256	50.225	2.96829	3.48147	2.71343	3.0544	44.6023	48.8089	38.7819	44.0644	403.705	424.259	284.916	370.96	26.9435	44.9436	32.6389	34.842	12.0615	17.737	15.0626	14.9537	109.844	154.352	110.882	125.026	0.797821	1.26601	1.05037	1.03807	2.39346	3.79802	3.15112	3.1142	63.7064	75.2508	62.917	67.2914	3.76611	4.74747	1.8819	3.46516	11.2983	14.2424	5.64571	10.3955	56.6638
SQ	75.1176	65.8316	64.0914	68.3469	3.53326	3.93154	3.49012	3.65164	64.3363	54.7482	53.5927	57.5591	448.928	325.502	327.437	367.289	101.075	81.1051	92.5277	91.5694	21.5761	22.9813	27.7232	24.0935	151.072	136.541	168.333	151.982	1.18941	1.65578	1.81622	1.5538	3.56822	4.96734	5.44866	4.66141	100.295	93.4694	97.2852	97.0165	4.72266	5.58732	2.65317	4.32105	14.168	16.7619	7.95951	12.9631	85.9124
											max	75.1				640.96								30.82				247.35
											min	38.68				284.96								11.71				86.4
	Row1										max/min	1.94157				2.2493	Row1							2.63194				2.86285					Row1				Row1								Row1			Column1
	Mean	50.225							10.0987								Mean	34.842															Mean	3.1142			Mean	67.2914							Mean	10.3955		Mean	11.8628
	Standard Error	2.84955							0.145655								Standard Error	5.31166															Standard Error	0.40588			Standard Error	3.98623							Standard Error	2.52238		Standard Error	0.168183
	Median	50.1534							10.1279								Median	32.6389															Median	3.15112			Median	63.7064							Median	11.2983		Median	11.9813
	Mode	#N/A							#N/A								Mode	#N/A															Mode	#N/A			Mode	#N/A							Mode	#N/A		Mode	#N/A
	Standard Deviation	4.93556							1.41217								Standard Deviation	9.20007															Standard Deviation	0.703005			Standard Deviation	6.90436							Standard Deviation	4.36889		Standard Deviation	1.63059
	Sample Variance	24.3597							1.99424								Sample Variance	84.6413															Sample Variance	0.494215			Sample Variance	47.6702							Sample Variance	19.0872		Sample Variance	2.65884
	Kurtosis	#DIV/0!							0.996797								Kurtosis	#DIV/0!															Kurtosis	#DIV/0!			Kurtosis	#DIV/0!							Kurtosis	#DIV/0!		Kurtosis	-0.357745
	Skewness	0.0652006							0.734354								Skewness	1.0158															Skewness	-0.235667			Skewness	1.70662							Skewness	-0.890222		Skewness	0.17136
	Range	9.87034							7.3101								Range	18.0001															Range	1.40455			Range	12.3338							Range	8.5967		Range	7.32938
	Minimum	45.3256							7.5282								Minimum	26.9435															Minimum	2.39346			Minimum	62.917							Minimum	5.64571		Minimum	8.75764
	Maximum	55.1959							14.8383								Maximum	44.9436															Maximum	3.79802			Maximum	75.2508							Maximum	14.2424		Maximum	16.087
	Sum	150.675							949.274								Sum	104.526															Sum	9.3426			Sum	201.874							Sum	31.1864		Sum	1115.1
	Count	3							94								Count	3															Count	3			Count	3							Count	3		Count	94
	Row1																Row1																Row1				Row1								Row1
	Mean	68.3469															Mean	91.5694															Mean	4.66141			Mean	97.0165							Mean	12.9631
	Standard Error	3.42242															Standard Error	5.78476															Standard Error	0.563975			Standard Error	1.97496							Standard Error	2.61148
	Median	65.8316															Median	92.5277															Median	4.96734			Median	97.2852							Median	14.168
	Mode	#N/A															Mode	#N/A															Mode	#N/A			Mode	#N/A							Mode	#N/A
	Standard Deviation	5.92781															Standard Deviation	10.0195															Standard Deviation	0.976834			Standard Deviation	3.42073							Standard Deviation	4.52322
	Sample Variance	35.1389															Sample Variance	100.39															Sample Variance	0.954205			Sample Variance	11.7014							Sample Variance	20.4595
	Kurtosis	#DIV/0!															Kurtosis	#DIV/0!															Kurtosis	#DIV/0!			Kurtosis	#DIV/0!							Kurtosis	#DIV/0!
	Skewness	1.56564															Skewness	-0.426487															Skewness	-1.2711			Skewness	-0.351233							Skewness	-1.11361
	Range	11.0262															Range	19.9701															Range	1.88044			Range	6.82561							Range	8.80244
	Minimum	64.0914															Minimum	81.1051															Minimum	3.56822			Minimum	93.4694							Minimum	7.95951
	Maximum	75.1176															Maximum	101.075															Maximum	5.44866			Maximum	100.295							Maximum	16.7619
	Sum	205.041															Sum	274.708															Sum	13.9842			Sum	291.05							Sum	38.8894
	Count	3															Count	3															Count	3			Count	3							Count	3
	t-Test: Paired Two Sample for Means																t-Test: Paired Two Sample for Means																t-Test: Paired Two Sample for Means			Column1									t-Test: Paired Two Sample for Means
		Variable 1	Variable 2															Variable 1	Variable 2															Variable 1	Variable 2	Mean	4.04141									Variable 1	Variable 2
	Mean	50.225	68.3469														Mean	34.842	91.5694														Mean	3.1142	4.66141	Standard Error	0.0868688								Mean	10.3955	12.9631
	Variance	24.3597	35.1389														Variance	84.6413	100.39														Variance	0.494215	0.954205	Median	3.89929								Variance	19.0872	20.4595
	Observations	3	3														Observations	3	3														Observations	3	3	Mode	#N/A								Observations	3	3
	Pearson Correlation	0.134358															Pearson Correlation	-0.992076															Pearson Correlation	0.747149		Standard Deviation	0.842225								Pearson Correlation	0.998604
	Hypothesized Mean Difference	0															Hypothesized Mean Difference	0															Hypothesized Mean Difference	0		Sample Variance	0.709342								Hypothesized Mean Difference	0
	df	2															df	2															df	2		Kurtosis	-0.515063								df	2
	t Stat	-4.36803															t Stat	-5.12236															t Stat	-4.12402		Skewness	0.340335								t Stat	-15.8243
	P(T<=t) one-tail	0.0243106															P(T<=t) one-tail	0.0180314															P(T<=t) one-tail	0.0270364		Range	3.63271								P(T<=t) one-tail	0.00198487
	t Critical one-tail	2.91999															t Critical one-tail	2.91999															t Critical one-tail	2.91999		Minimum	2.41948								t Critical one-tail	2.91999
	P(T<=t) two-tail	0.0486211															P(T<=t) two-tail	0.0360628															P(T<=t) two-tail	0.0540727		Maximum	6.05219								P(T<=t) two-tail	0.00396973
	t Critical two-tail	4.30265															t Critical two-tail	4.30265															t Critical two-tail	4.30265		Sum	379.893								t Critical two-tail	4.30265
																																				Count	94
																																					t-Test: Paired Two Sample for Means
																																						Variable 1	Variable 2
																																					Mean	67.2914	97.0165
																																					Variance	47.6702	11.7014
																																					Observations	3	3
																																					Pearson Correlation	-0.87141
																																					Hypothesized Mean Difference	0
																																					df	2
																																					t Stat	-5.13486
																																					P(T<=t) one-tail	0.0179484
																																					t Critical one-tail	2.91999
																																					P(T<=t) two-tail	0.0358967
																																					t Critical two-tail	4.30265
[truncated: 83 more columns]

## Sheet: Correlation matrix 2007
		Mean 2007	Mean 0-3h	Mean 2007	Mean 2007	Mean 2007	Mean 2007	Mean 2007	Mean 0-6h	Mean 2007	Mean 2007	Mean 2007	Mean 2007	Mean	Mean	Mean	Mean	Mean 2007	Mean	Mean	Mean 2007	Mean 2007	Mean 2007	Mn spec water cont	Mean 2007	Mean 2007	Lamina thickness	Thickness at	Mean	Stomatal no
		%ELWL0-3h	3h loss/cm2/h	%ELWLFW 0-3h	%ELWLDW 0-3h	%ELWL 3-6h	3-6h loss/cm2/h	%ELWL 0-6h	loss/cm2/h	%ELWLFW 0-6h	%ELWLDW 0-6h	length	width	leaf area	FW after 0h	FW after 3h	FW after 6h	Initial water	DW (after 48h)	0-3h water loss	0-6h wt loss	3h water	SLA cm2/gFW	SWC mgIH20/cm2	SLA cm2/gDW	DW%FW 0h	SQ Mean	Mn midrib	Lamina+midrib	Mean of 6
Mean 2007	%ELWL0-3h	1
Mean 0-3h	3h loss/cm2/h	0.856453	1
Mean 2007	%ELWLFW 0-3h	0.994021	0.863834	1
Mean 2007	%ELWLDW 0-3h	0.893202	0.864682	0.917665	1
Mean 2007	%ELWL 3-6h	0.780061	0.643748	0.779028	0.667673	1
Mean 2007	3-6h loss/cm2/h	-0.2552	-0.0636343	-0.248179	-0.192949	0.325657	1
Mean 2007	%ELWL 0-6h	0.860268	0.731999	0.862835	0.762631	0.969668	0.239717	1
Mean 0-6h	loss/cm2/h	0.659647	0.856991	0.676857	0.694265	0.76629	0.420989	0.800671	1
Mean 2007	%ELWLFW 0-6h	0.858386	0.748417	0.864592	0.793213	0.963927	0.248863	0.997238	0.817629	1
Mean 2007	%ELWLDW 0-6h	0.715988	0.736695	0.745788	0.879495	0.782301	0.272036	0.830853	0.801675	0.86944	1
Mean 2007	length	-0.420421	-0.163046	-0.39506	-0.288943	-0.390823	0.117504	-0.4081	-0.0915293	-0.393313	-0.251385	1
Mean 2007	width	-0.172089	-0.0749953	-0.15597	-0.109033	-0.1763	0.0157753	-0.158425	-0.0968175	-0.149877	-0.0906602	0.421586	1
Mean	leaf area	-0.339102	-0.141266	-0.315516	-0.225681	-0.319823	0.0820629	-0.319629	-0.110779	-0.305677	-0.188448	0.8066	0.870179	1
Mean	FW after 0h	-0.340072	0.0135814	-0.313727	-0.183029	-0.323419	0.191393	-0.318156	0.0831052	-0.296492	-0.12917	0.841538	0.731069	0.929089	1
Mean	FW after 3h	-0.79282	-0.504168	-0.780312	-0.653232	-0.660319	0.255628	-0.708659	-0.351359	-0.696465	-0.524752	0.776426	0.5407	0.775956	0.82294	1
Mean	FW after 6h	-0.777936	-0.547217	-0.771463	-0.659472	-0.865204	-0.131269	-0.889818	-0.58011	-0.881769	-0.707739	0.685879	0.417416	0.644455	0.675739	0.907013	1
Mean 2007	Initial water	-0.337811	0.0213695	-0.309664	-0.164625	-0.324697	0.191521	-0.318003	0.0893917	-0.293586	-0.108064	0.840641	0.723689	0.923954	0.99912	0.820148	0.674018	1
Mean	DW (after 48h)	-0.336313	-0.0487846	-0.325914	-0.317046	-0.292708	0.178197	-0.299111	0.0280541	-0.300616	-0.288015	0.795064	0.742945	0.910582	0.943296	0.792641	0.646342	0.928544	1
Mean	0-3h water loss	0.420226	0.658191	0.450076	0.515201	0.280124	0.00665037	0.350953	0.592811	0.373064	0.444924	0.472679	0.581352	0.625519	0.688875	0.155078	0.0177575	0.690907	0.628933	1
Mean 2007	0-6h wt loss	0.178531	0.465725	0.208809	0.29352	0.272582	0.366159	0.299874	0.587923	0.322536	0.405846	0.574303	0.645219	0.726528	0.796658	0.36786	0.0927834	0.796882	0.74417	0.915932	1
Mean 2007	3h water	-0.839263	-0.562365	-0.82691	-0.684532	-0.696803	0.258438	-0.750434	-0.402823	-0.73636	-0.544084	0.740702	0.482819	0.720026	0.767534	0.994333	0.914531	0.766944	0.723331	0.065965	0.286856	1
Mean 2007	SLA cm2/gFW	0.175084	-0.324118	0.155623	0.0189526	0.146575	-0.34649	0.142155	-0.466783	0.117531	-0.050507	-0.48598	-0.0814309	-0.313137	-0.628799	-0.489135	-0.37676	-0.634719	-0.54191	-0.46931	-0.540415	-0.459474	1
Mn spec water cont	SWC mgIH20/cm2	-0.162509	0.343864	-0.137736	0.0391052	-0.152113	0.332423	-0.141084	0.472552	-0.108573	0.111313	0.472032	0.0730163	0.29865	0.622173	0.477614	0.372068	0.633283	0.494618	0.472486	0.535311	0.454673	-0.982823	1
Mean 2007	SLA cm2/gDW	0.0926462	-0.177494	0.113905	0.297673	0.0280132	-0.232796	0.0527993	-0.301118	0.0869867	0.31936	-0.271121	-0.018305	-0.151469	-0.358422	-0.295731	-0.223664	-0.33435	-0.526144	-0.245925	-0.300739	-0.243184	0.662165	-0.5668	1
Mean 2007	DW%FW 0h	0.0828695	-0.180088	0.0319079	-0.356966	0.141701	-0.103188	0.103759	-0.176291	0.0307182	-0.457139	-0.252567	-0.110004	-0.212979	-0.32495	-0.225197	-0.18473	-0.362711	-0.00536923	-0.277715	-0.287451	-0.25411	0.354853	-0.463067	-0.451924	1
Lamina thickness	SQ Mean	-0.203848	-0.0555273	-0.166606	-0.125124	0.0105981	0.341798	-0.0159545	0.116755	-0.00796465	0.0286809	0.107173	0.322195	0.277736	0.293631	0.27385	0.111838	0.290413	0.30041	0.161179	0.304916	0.257765	-0.220062	0.190332	-0.147505	-0.0753204	1
Thickness at	Mn midrib	-0.311715	-0.0637427	-0.287016	-0.189237	-0.227908	0.232564	-0.238749	0.0579053	-0.220836	-0.0934145	0.351017	0.35202	0.421186	0.494898	0.469627	0.373545	0.495101	0.461787	0.261364	0.362185	0.451351	-0.432277	0.427205	-0.235377	-0.220104	0.42261	1
Mean	Lamina+midrib	-0.32117	-0.0686071	-0.291282	-0.195266	-0.201216	0.279553	-0.216483	0.076268	-0.19881	-0.0773507	0.335903	0.382062	0.434446	0.503592	0.476869	0.356995	0.503095	0.475462	0.267241	0.387499	0.457169	-0.432205	0.421419	-0.241164	-0.212336	0.587758	0.981632	1
Stomatal no	Mean of 6	0.176282	0.105757	0.166614	0.0709043	0.185056	0.0384899	0.22492	0.115435	0.208082	0.0738484	-0.347239	-0.0354182	-0.210179	-0.22651	-0.248079	-0.276845	-0.233081	-0.160073	-0.0773463	-0.0789531	-0.253048	0.131191	-0.152377	-0.04905	0.238356	0.28284	-0.201942	-0.120727	1
		P<0.05	P<0.01	P<0.001	P<0.0001
	92df	0.203	0.264	0.334	0.384
		-0.203	-0.264	-0.334	-0.384

## Sheet: All mn data 2007
	Mean 2007	Mean 2007	Mean	Mean 2007	Mean 0-3h	Mean 2007	Mean 2007	Mean 2007	Mean 2007	Mean 2007	Mean 2007	Mean 2007	Mean 0-6h	Mean 2007	Mean 2007	Mean	Mean	Mean	Mean 2007	Mean	Mean	Mean 2007	Mean 2007	Mean 2007	Mean 2007	Mn spec water cont	Mean 2007	Mean 2007	Lamina thickness	Thickness at	Mean	Stomatal no
CSDH	length	width	leaf area	%ELWL0-3h	3h loss/cm2/h	%ELWLFW 0-3h	%ELWLDW 0-3h	%ELWL 3-6h	3-6h loss/cm2/h	ELWLFW 3-6h	ELWLFD 3-6h	%ELWL 0-6h	loss/cm2/h	%ELWLFW 0-6h	%ELWLDW 0-6h	FW after 0h	FW after 3h	FW after 6h	Initial water	DW (after 48h)	0-3h water loss	3-6h water loss	0-6h wt loss	3h water	SLA cm2/gFW	SWC mgIH20/cm2	SLA cm2/gDW	DW%FW 0h	SQ Mean	Mn midrib	Lamina+midrib	Mean of 6
1	31.1	0.533333	13	45.2603	2.38338	39.682	322.677	19.6034	0.562736	9.37506	76.2632	55.9528	2.94611	49.057	398.94	0.222	0.133333	0.112333	0.194667	0.0273333	0.0886667	0.021	0.109667	0.106	55.9124	15.8047	452.861	12.3426	2.35	5.91	4.13	20.8333
2	32.0667	0.633333	15.9146	43.6133	2.29476	38.7184	345.354	51.6325	1.53276	25.8396	229.969	72.7276	3.82753	64.558	575.323	0.272667	0.167	0.096	0.242	0.0306667	0.105667	0.071	0.176667	0.136333	56.2587	15.7831	501.768	11.2259	2.37	6.64333	4.50667	17
3	27.9333	0.466667	10.2232	47.3709	2.89883	42.1045	380.861	67.2676	2.22311	31.756	288.622	83.0836	5.12194	73.8604	669.483	0.204667	0.119	0.0496667	0.182	0.0226667	0.0856667	0.0693333	0.155	0.0963333	48.4455	18.3935	438.158	11.0973	2.25833	5.41	3.83417	20.1667
4	32	0.533333	13.3562	36.4655	2.1973	29.1197	243.163	17.3815	0.652901	10.2729	84.6859	44.7851	2.55005	39.3926	327.849	0.245333	0.174333	0.149	0.215667	0.0296667	0.071	0.0253333	0.0963333	0.144667	52.2299	16.9922	431.614	12.0754	1.89	5.85333	3.87167	18.6667
5	32.2	0.7	17.5812	41.4806	2.01421	36.6132	312.184	35.0369	0.994695	18.1199	154.924	62.002	3.00891	54.7331	467.109	0.278667	0.176667	0.126	0.246	0.0326667	0.102	0.0506667	0.152667	0.144	60.6397	14.5615	517.443	11.7292	2.22667	6.97	4.59833	22
7	29.3667	0.5	11.453	35.4716	1.73458	31.1464	256.579	21.6269	0.679915	12.2497	100.731	49.4257	2.41449	43.3962	357.31	0.182333	0.125667	0.103333	0.16	0.0223333	0.0566667	0.0223333	0.079	0.103333	60.2375	14.6291	493.531	12.2141	2.24833	6.04333	4.14583	21.6667
8	28.2667	0.566667	12.4566	49.047	2.21278	42.2093	303.333	31.1455	0.706761	13.5465	97.1833	64.7922	2.91954	55.7558	400.517	0.186333	0.107333	0.082	0.160333	0.026	0.079	0.0253333	0.104333	0.0813333	64.5307	13.4425	460.677	13.9826	2.16167	5.87333	4.0175	28.8333
9	24.9333	0.533333	10.413	42.7908	1.91212	37.0775	278.093	26.5887	0.67756	13.1726	99.053	57.987	2.58968	50.2501	377.146	0.154667	0.0973333	0.077	0.134	0.0206667	0.0573333	0.0203333	0.0776667	0.0766667	64.8101	13.3847	487.358	13.3279	2.24667	5.22333	3.735	28
10	30.7333	0.566667	13.598	45.9419	2.44346	40.06	320.642	75.5272	2.18599	35.5687	273.584	87.0106	4.62945	75.6287	594.226	0.24	0.144667	0.0586667	0.208333	0.0316667	0.0953333	0.086	0.181333	0.113	54.4969	15.9607	428.991	13.0535	2.35667	5.76	4.05833	24
11	29.9	0.5	11.661	58.7217	3.30088	51.4615	417.078	48.4079	1.1058	17.2692	139.839	78.4296	4.40668	68.7307	556.917	0.215333	0.103667	0.0663333	0.188667	0.0266667	0.111667	0.0373333	0.149	0.077	52.5138	16.7827	426.684	12.3541	2.28833	6.54667	4.4175	22.6667
12	30.1667	0.633333	14.9344	43.5729	2.34999	37.9586	295.06	16.6814	0.508739	8.15431	63.8239	52.9239	2.85873	46.1129	358.884	0.266	0.165	0.143333	0.231667	0.0343333	0.101	0.0216667	0.122667	0.130667	54.029	16.1532	418.761	12.9004	2.335	6.915	4.625	18.75
13	32.3	0.566667	14.3052	63.3138	3.25562	55.7846	470.215	78.2021	1.47063	25.1814	212.722	91.8857	4.72625	80.966	682.937	0.240667	0.106333	0.046	0.212	0.0286667	0.134333	0.0603333	0.194667	0.0776667	57.2798	15.4616	482.511	11.874	2.3325	5.855	4.09375	25.25
14	33.0667	0.666667	17.2588	59.5433	3.11526	52.1838	422.481	68.3964	1.45126	24.3763	197.986	87.345	4.56652	76.5601	620.467	0.296333	0.142	0.0696667	0.259667	0.0366667	0.154333	0.0723333	0.226667	0.105333	55.9037	15.6844	452.89	12.3509	2.24	6.36	4.3	26.8333
15	26.5333	0.5	10.348	59.563	3.32675	52.1424	419.143	77.1854	1.73059	27.1771	218.176	90.6134	5.05734	79.3195	637.319	0.19	0.0906667	0.039	0.166333	0.0236667	0.0993333	0.0516667	0.151	0.067	52.4997	16.7143	420.562	12.478	2.11833	6.39333	4.25583	21.6667
16	28.8333	0.5	11.245	59.4675	2.93649	51.0578	361.439	71.4521	1.41642	24.6627	174.638	88.191	4.35291	75.7205	536.077	0.187	0.0916667	0.0456667	0.160667	0.0263333	0.0953333	0.046	0.141333	0.0653333	58.369	14.8215	412.946	14.1231	2.19833	5.35667	3.7775	31
17	26.9333	0.566667	11.8924	52.9223	2.46538	40.7501	290.238	41.7818	1.01969	18.1452	129.053	68.5423	3.30129	58.8953	419.291	0.193	0.114333	0.0793333	0.165667	0.0273333	0.0786667	0.035	0.113667	0.087	59.1808	14.5616	419.383	14.1541	1.94	6.19	4.065	19.5
18	30.6667	0.6	14.352	66.1187	3.71377	58.3552	497.016	85.0118	1.58999	24.7665	211.537	94.1696	5.30376	83.1217	708.553	0.264333	0.11	0.0446667	0.233333	0.031	0.154333	0.0653333	0.219667	0.079	52.2499	16.9261	445.446	11.7278	2.365	6.04	4.2025	33.5
19	29.3333	0.5	11.44	52.1599	2.97233	46.1788	402.778	51.2668	1.40052	21.7906	190.389	76.7673	4.37285	67.9694	593.167	0.212333	0.114333	0.068	0.188	0.0243333	0.098	0.0463333	0.144333	0.09	51.8401	17.0974	452.271	11.4628	2.17667	6.42333	4.3	27.6667
20	28.9667	0.7	15.8158	55.4703	2.80748	48.9604	417.208	34.2623	0.759395	13.2638	113.105	70.4964	3.56688	62.2242	530.313	0.261333	0.132333	0.0976667	0.230667	0.0306667	0.129	0.0346667	0.163667	0.101667	58.3149	15.147	496.865	11.7361	2.365	6.43333	4.39917	26.3333
21	26.7	0.6	12.4956	66.6311	3.07768	58.3376	469.304	89.3994	1.38217	26.2486	212.57	96.5837	4.45985	84.5861	681.874	0.190333	0.079	0.0293333	0.166667	0.0236667	0.111333	0.0496667	0.161	0.0553333	63.2914	13.8503	509.899	12.4269	2.21333	5.57	3.89167	21.3333
22	29.9	0.5	11.6896	58.4015	3.68718	51.9246	468.582	73.026	1.81835	25.6597	231.965	87.2557	5.50553	77.5844	700.547	0.239	0.117333	0.0566667	0.212667	0.0263333	0.121667	0.0606667	0.182333	0.091	47.0063	18.9665	425.55	11.061	2.28667	7.12667	4.70667	24
23	28.7667	0.533333	11.9444	51.8328	2.28521	44.7485	327.78	53.1295	1.12327	21.9368	160.435	77.2487	3.40848	66.6853	488.215	0.176	0.0973333	0.0586667	0.152	0.024	0.0786667	0.0386667	0.117333	0.0733333	65.439	13.2176	480.221	13.6483	2.20833	5.77333	3.99083	28
24	30.7667	0.566667	13.6422	48.9528	2.67329	42.6642	332.632	39.1279	1.06363	17.0129	132.448	68.4774	3.73692	59.6771	465.079	0.244667	0.141333	0.1	0.213	0.0316667	0.103333	0.0413333	0.144667	0.109667	53.6346	16.3004	416.137	12.8961	2.24667	5.83	4.03833	25.8333
25	37.2333	0.533333	15.5064	48.7473	3.08938	43.9096	442.457	30.7337	0.993629	14.1864	142.96	64.4966	4.08301	58.0959	585.417	0.312333	0.175333	0.131	0.281333	0.031	0.137	0.0443333	0.181333	0.144333	47.6972	19.0038	480.687	9.92453	2.13167	5.91333	4.0225	26.3333
26	37.6667	0.5	14.69	40.1676	2.44068	35.8458	333.414	22.4066	0.80997	11.9431	111.002	53.5519	3.25065	47.7889	444.416	0.289	0.185667	0.151333	0.258	0.031	0.103333	0.0343333	0.137667	0.154667	49.0932	18.2547	456.393	10.7492	2.08167	6.10667	4.09417	20.8333
27	35.5333	0.6	16.6296	51.7679	2.87054	45.0846	350.356	70.4905	1.86881	29.5685	228.256	85.7555	4.73935	74.653	578.612	0.304333	0.166667	0.077	0.265	0.0393333	0.137667	0.0896667	0.227333	0.127333	52.602	16.5754	407.209	12.9389	2.31333	5.75333	4.03333	30
28	36.1	0.7	19.7106	48.6319	2.59322	42.9159	365.187	34.5428	0.938907	15.5209	132.124	66.219	3.53212	58.4368	497.311	0.343	0.195667	0.142333	0.302667	0.0403333	0.147333	0.0533333	0.200667	0.155333	55.268	15.9757	469.939	11.7592	2.16	6.24	4.2	22
29	30.1667	0.466667	11.0162	54.5778	2.982	48.6631	450.694	70.0072	1.7153	28.0041	258.333	86.0005	4.69729	76.6672	709.028	0.194667	0.101	0.0466667	0.173333	0.0213333	0.0936667	0.0543333	0.148	0.0796667	54.4162	16.3793	501.354	10.8858	2.04333	6.255	4.14917	26.5
30	23.5	0.5	9.165	52.7654	2.40716	46.3644	382.54	44.769	0.953573	18.4912	152.91	73.8028	3.36073	64.8556	535.45	0.137333	0.0733333	0.048	0.120667	0.0166667	0.064	0.0253333	0.0893333	0.0566667	64.6508	13.6556	533.234	12.1404	2.02667	5.58333	3.805	24
31	30.7333	0.666667	15.9744	55.5889	2.95429	49.4583	449.495	61.4823	1.44898	24.2609	220.028	82.864	4.40327	73.7192	669.523	0.275333	0.139	0.072	0.245	0.0303333	0.136333	0.067	0.203333	0.108667	55.8227	15.9367	506.176	11.0472	2.33167	6.68333	4.5075	24.3333
32	27.7667	0.533333	11.4894	76.6158	4.27456	68.7995	674.603	73.9653	0.95888	15.3634	150.794	93.7228	5.23344	84.1629	825.397	0.206	0.0643333	0.0326667	0.185	0.021	0.141667	0.0316667	0.173333	0.0433333	53.6692	16.7682	526.071	10.1973	2.195	4.855	3.525	27
33	29.1667	0.566667	12.883	59.0999	3.04582	52.0483	436.359	81.8296	1.71343	29.5055	247.744	92.596	4.75925	81.5539	684.103	0.215333	0.103333	0.0396667	0.189667	0.0256667	0.112	0.0636667	0.175667	0.0776667	57.4232	15.422	482.115	11.9263	2.285	5.79333	4.03917	21.3333
34	29.3667	0.566667	13.0052	68.9668	3.82591	60.4171	487.476	84.0071	1.44063	22.7971	183.767	94.9933	5.26655	83.2142	671.243	0.236333	0.0933333	0.0396667	0.207	0.0293333	0.143	0.0536667	0.196667	0.064	52.7738	16.6281	425.394	12.4012	2.26833	5.36667	3.8175	35.5
35	26.6	0.5	10.374	61.9067	3.15495	53.3631	387.487	69.3105	1.29258	21.943	160.191	87.342	4.44754	75.3061	547.679	0.176667	0.082	0.0433333	0.152333	0.0243333	0.0946667	0.0386667	0.133333	0.0576667	56.6236	15.2492	413.827	13.7312	2.12	6.02667	4.07333	30.1667
36	27.5333	0.566667	12.4982	68.4724	3.79333	60.1905	499.223	84.7664	1.42114	23.0355	189.708	94.7037	5.21447	83.226	688.931	0.218333	0.0903333	0.0396667	0.191333	0.027	0.128	0.0506667	0.178667	0.0633333	54.0588	16.4616	444.524	12.1487	2.445	5.34667	3.89583	32.1667
37	25.8667	0.5	10.088	81.5546	4.18197	70.3853	515.957	92.1429	0.869271	14.6	107.839	98.4527	5.05124	84.9853	623.796	0.173	0.0513333	0.026	0.149333	0.0236667	0.121667	0.0253333	0.147	0.0276667	56.0999	15.3933	411.945	13.6743	2.025	4.82667	3.42583	31.6667
38	21.5333	0.4	6.7184	79.1667	3.60775	64.5524	544.259	82.684	1.02279	20.0454	164.074	96.1705	4.31218	84.5978	708.333	0.099	0.0353333	0.015	0.087	0.012	0.0636667	0.0203333	0.084	0.0233333	65.7162	13.4321	553.444	12.0009	1.95333	4.64667	3.3	27.6667
39	26.1667	0.6	12.311	70.6677	3.5421	61.8076	501.216	80.4313	1.23807	21.3938	181.052	94.965	4.78017	83.2014	682.268	0.201667	0.0773333	0.0336667	0.176667	0.025	0.124333	0.0436667	0.168	0.0523333	58.3526	15.0764	474.247	12.4373	2.36833	5.85333	4.11083	33.5
40	25.1	0.566667	11.167	71.2455	3.46867	62.1159	485.356	75.9903	1.05755	18.7746	145.636	92.8018	4.52622	80.8905	630.992	0.181	0.0706667	0.0353333	0.157667	0.0233333	0.110333	0.0353333	0.145667	0.0473333	59.7493	14.6319	465.371	12.847	2.31333	6.03	4.17167	32
41	26.4667	0.666667	13.858	52.6628	3.63852	46.8558	426.973	32.172	1.04546	13.5083	122.427	67.8559	4.68398	60.3641	549.4	0.307333	0.164667	0.123	0.273	0.0343333	0.142667	0.0416667	0.184333	0.130333	43.0992	20.6721	390.088	11.0698	2.31333	6.45	4.38167	30.5
42	23.1333	0.5	9.022	89.845	5.58617	79.8374	716.886	71.4504	0.472314	6.79675	61.1842	97.4913	6.05849	86.6342	778.07	0.182333	0.0366667	0.0243333	0.162	0.0203333	0.145667	0.0123333	0.158	0.0163333	47.6979	18.6408	428.527	11.1358	2.14667	5.99	4.06833	31.1667
43	24.8333	0.5	9.7734	81.8578	3.62098	72.4385	630.152	65.8392	0.629833	12.2299	107.576	95.6589	4.25081	84.6685	737.727	0.143333	0.042	0.022	0.127	0.0163333	0.101333	0.02	0.121333	0.0256667	66.5872	13.3348	579.318	11.4872	2.20333	5.82667	4.015	26.8333
44	24.4	0.4	7.6128	85.4701	4.379	74.0741	555.556	94.1176	0.728597	11.8519	88.8889	99.1453	5.28233	85.9259	644.444	0.135	0.035	0.019	0.117	0.018	0.1	0.00533333	0.116	0.017	54.2222	15.9836	406.667	13.3333	2.08833	5.70333	3.89583	26.3333
45	33.7333	0.533333	14.0114	56.1572	3.22408	49.7714	439.234	47.2638	1.12772	17.5234	154.061	75.9386	4.3518	67.2948	593.295	0.259333	0.129333	0.0836667	0.229667	0.0296667	0.13	0.0456667	0.175667	0.0996667	52.0097	17.1098	453.94	11.4711	2.0325	5.72	3.87625	15.25
46	27.0333	0.566667	11.9626	49.3473	2.68432	43.9803	404.632	31.8461	0.868786	14.2206	130.877	65.3026	3.5531	58.2009	535.509	0.210667	0.118667	0.089	0.187667	0.023	0.092	0.0296667	0.121667	0.0956667	54.6258	16.3392	501.942	10.8937	2.355	5.36	3.8575	28.8333
47	21.0333	0.366667	6.2218	67.422	3.43167	60.2417	573.016	89.6108	1.46876	25.7587	238.095	96.3423	4.90044	86.0004	811.111	0.106333	0.0453333	0.0166667	0.0946667	0.0116667	0.061	0.0286667	0.0896667	0.0336667	59.501	15.3228	557.024	10.7415	2.425	6.105	4.265	24
48	27.3	0.566667	12.0692	58.1194	2.8048	51.9122	507.648	55.102	1.10967	20.5352	200.707	81.1124	3.91447	72.4474	708.355	0.188	0.09	0.0513333	0.168	0.02	0.098	0.0386667	0.136667	0.07	61.651	14.4788	599.391	10.7403	2.105	5.83	3.9675	24
49	25.0333	0.566667	11.128	56.3715	2.81023	47.9198	322.336	47.9748	1.03855	17.74	119.159	77.2461	3.84877	65.6598	441.496	0.190667	0.0993333	0.0656667	0.162667	0.028	0.0913333	0.0336667	0.125	0.0713333	57.2799	14.9816	382.441	14.0608	2.02167	4.86333	3.4425	25.3333
50	27.3333	0.466667	9.984	57.4996	3.58045	50.7307	432.155	65.9906	1.72524	24.6543	209.371	85.4541	5.30569	75.385	641.526	0.202667	0.1	0.0506667	0.179	0.0236667	0.102667	0.0493333	0.152	0.0763333	47.6507	18.7065	405.64	11.7639	2.08	6.61	4.345	24.3333
51	24.7667	0.5	9.7032	66.4319	3.55573	59.1658	541.754	93.5462	1.70659	27.7079	250.658	97.5887	5.26233	86.8737	792.412	0.167667	0.067	0.0216667	0.149333	0.0183333	0.100667	0.0453333	0.146	0.0486667	55.2137	16.1917	504.474	10.9855	2.02	5.895	3.9575	20.5
52	28.5	0.566667	12.61	51.2492	2.57311	44.6337	346.571	44.6545	1.08815	18.8913	146.381	72.9471	3.66126	63.5251	492.952	0.209667	0.115667	0.076	0.182667	0.027	0.094	0.0396667	0.133667	0.0886667	57.8218	15.0623	448.036	12.9305	2.40333	6.76	4.58167	34
53	31.0667	0.6	14.651	45.3704	2.46368	39.4956	306.127	39.5966	1.16514	18.6941	144.791	66.8478	3.62882	58.1897	450.917	0.258333	0.158	0.110333	0.224333	0.034	0.100333	0.0476667	0.148	0.124	53.8696	16.2127	414.224	13.0044	2.28333	5.94667	4.115	30.1667
54	32.5333	0.566667	14.352	47.3448	2.64759	41.7429	353.098	54.278	1.59738	25.2282	212.913	75.9671	4.24497	66.9711	566.012	0.262333	0.152667	0.087	0.231333	0.031	0.109667	0.0656667	0.175333	0.121667	52.6983	16.7696	445.033	11.8362	2.50167	6.87333	4.6875	28.6667
55	28.8667	0.566667	12.6828	72.9412	4.49077	64.3395	545.891	82.1745	1.36073	19.8042	167.473	95.4032	5.8515	84.1437	713.364	0.254667	0.0903333	0.0406667	0.224667	0.03	0.164333	0.0496667	0.214	0.0603333	48.0091	18.4126	407.022	11.7952	2.24333	6.03	4.13667	21.8333
56	26.6667	0.5	10.4	51.0219	2.6218	44.6739	359.776	39.6461	0.990069	16.9164	136.388	70.3388	3.61187	61.5903	496.164	0.176667	0.098	0.0683333	0.154667	0.022	0.0786667	0.0296667	0.108333	0.076	56.8419	15.4439	458.072	12.4435	2.28667	6.35333	4.32	31.8333
57	27.9667	0.533333	11.6662	65.4482	3.57058	56.7026	424.352	83.3558	1.55071	24.8834	186.322	94.1672	5.12129	81.5861	610.674	0.209667	0.091	0.0386667	0.181667	0.028	0.118667	0.0523333	0.171	0.063	53.4339	16.2984	400.052	13.3598	2.285	5.81	4.0475	27.6667
58	30.2	0.666667	15.6494	66.824	3.40661	58.9139	498.796	87.5845	1.4553	25.3979	211.376	95.7013	4.86191	84.3118	710.172	0.260667	0.106	0.0406667	0.229667	0.031	0.154667	0.0653333	0.22	0.075	57.907	15.2332	486.805	11.9125	2.29167	6.13333	4.2125	22
59	33.5333	0.666667	17.4408	53.6005	2.99801	46.7415	365.286	63.7011	1.63841	25.4845	199.377	82.82	4.63642	72.226	564.663	0.323333	0.172667	0.0896667	0.282	0.0413333	0.150667	0.083	0.233667	0.131333	51.9017	16.8067	405.786	12.7899	2.29667	6.74333	4.52	21.3333
60	25.3	0.466667	9.1936	52.4821	2.84641	45.774	365.812	55.4694	1.43128	22.865	183.686	78.6758	4.27769	68.639	549.499	0.163	0.088	0.0503333	0.142333	0.0206667	0.075	0.0376667	0.112667	0.0673333	54.5179	16.2072	432.264	12.8328	2.32	6.28	4.3	26.5
61	29.4333	0.666667	15.2854	48.8367	3.00863	43.123	369.603	46.9944	1.47846	21.1487	180.45	72.802	4.48708	64.2717	550.053	0.308	0.174667	0.109	0.272	0.036	0.133333	0.0656667	0.199	0.138667	47.8274	18.4712	410.25	11.6955	2.225	6.73333	4.47917	22.1667
62	25.0667	0.466667	9.1468	49.7755	2.34486	44.5992	455.682	37.2447	0.871404	16.5513	167.664	68.2637	3.21627	61.1504	623.346	0.138333	0.0763333	0.0533333	0.124333	0.014	0.062	0.023	0.085	0.0623333	63.5116	14.1181	653.22	10.3515	2.13667	5.77	3.95333	28.3333
63	29.9333	0.7	16.406	59.8234	3.12821	51.9522	395.556	79.2887	1.63794	27.0373	206.627	90.9401	4.76615	78.9895	602.183	0.286667	0.14	0.0626667	0.249333	0.0373333	0.146667	0.0773333	0.224	0.102667	55.3428	15.7874	422	13.1049	2.265	6.19	4.2275	29
64	28.5	0.533333	11.8326	58.1183	2.57276	50.7149	398.586	47.2676	0.871408	17.2347	135.833	77.8608	3.44417	67.9496	534.419	0.172667	0.085	0.0553333	0.150667	0.022	0.0876667	0.0296667	0.117333	0.063	65.8942	13.3041	518.182	12.7242	2.00167	5.07667	3.53917	26.6667
65	34.1	0.6	15.9588	60.2098	3.62279	54.1424	538.614	48.8776	1.13901	17.0114	169.468	79.1248	4.7618	71.1537	708.082	0.308	0.141333	0.089	0.277	0.031	0.166667	0.0523333	0.219	0.110333	49.8246	18.0698	495.388	10.0656	1.945	5.07333	3.50917	19.1667
66	28.6	0.533333	11.986	68.3937	3.01312	66.6404	478.625	82.779	0.760412	14.7038	104.451	94.5389	4.27434	81.3442	583.077	0.181333	0.063	0.0346667	0.156	0.0253333	0.118333	0.0283333	0.146667	0.0376667	63.6132	13.5483	455.331	13.9653	2.28333	5.84333	4.06333	23.3333
67	26.9333	0.433333	9.126	73.2586	3.81008	63.5284	478.571	88.7311	1.2282	20.3339	152.513	96.7228	5.03828	83.8623	631.085	0.158	0.057	0.0253333	0.137	0.021	0.101	0.0316667	0.132667	0.036	55.5492	15.64	418.204	13.3026	2.13	5.12	3.625	25.1667
69	28.4	0.566667	12.4748	52.0285	2.45716	45.8268	384.722	52.8945	1.15458	21.5645	180.952	76.5128	3.61173	67.3913	565.675	0.193667	0.105	0.0633333	0.170667	0.023	0.0886667	0.0416667	0.130333	0.082	62.3287	14.2298	523.185	11.8975	2.155	5.53	3.8425	26.3333
70	21.8667	0.4	6.8224	71.5782	3.38215	61.7943	454.167	89.6713	1.21646	21.9325	163.69	96.9175	4.59861	83.7267	617.857	0.108333	0.042	0.0176667	0.0936667	0.0146667	0.0663333	0.0243333	0.0906667	0.0273333	60.7715	14.2419	447.946	13.5991	2.28333	5.01	3.64667	31.3333
71	32.6667	0.766667	19.5442	52.8604	2.80684	46.5532	390.208	41.3176	1.02774	16.9847	142.439	72.1448	3.83457	63.5378	532.647	0.338	0.180667	0.123333	0.297667	0.0403333	0.157333	0.0573333	0.214667	0.140333	55.5384	15.9089	465.341	11.9305	2.29167	6.99333	4.6425	24.8333
72	24.6333	0.466667	8.9908	66.0198	3.26868	57.3362	436.97	68.6077	1.13499	19.7638	149.697	88.7969	4.40367	77.1	586.667	0.148333	0.0643333	0.0346667	0.128667	0.0196667	0.084	0.0296667	0.113667	0.0446667	58.3463	14.9068	443.227	13.1871	2.18833	5.75667	3.9725	33.5
80	25.4333	0.5	9.919	76.7554	3.33287	66.6354	506.285	84.6525	0.816157	16.0506	122.168	95.2381	4.14903	82.6861	628.453	0.144	0.0486667	0.0253333	0.125	0.019	0.0953333	0.0233333	0.118667	0.0296667	66.4391	13.1076	504.694	13.1816	1.995	5.58	3.7875	22.8333
86	32.8	0.5	12.8388	56.3544	3.49816	49.6434	419.713	56.0419	1.50422	21.3105	180.015	80.5487	5.00238	70.9539	599.728	0.259	0.131333	0.0766667	0.228667	0.0303333	0.127667	0.0546667	0.182333	0.101	47.4751	18.6353	403.403	11.8547	2.2	6.82333	4.51167	23
87	25.2333	0.433333	8.4838	65.9032	3.07804	57.7721	485.661	69.1185	1.02571	19.0488	162.751	87.5808	4.10375	76.821	648.413	0.131	0.0556667	0.0306667	0.115333	0.0156667	0.0753333	0.025	0.100333	0.04	62.724	14.2412	524.099	12.1032	2.09333	5.45333	3.77333	25.1667
88	25.0333	0.533333	10.4546	79.953	3.47482	69.0493	506.502	96.1058	0.836098	16.1681	117.987	98.6893	4.31092	85.2174	624.489	0.153333	0.0486667	0.023	0.132333	0.021	0.104667	0.0256667	0.130333	0.0276667	66.3532	13.1244	486.795	13.6542	2.07	5.43	3.75	24
90	26.4333	0.7	14.4326	69.2266	3.03734	61.7718	575.595	81.2855	1.08077	21.9139	205.556	93.7664	4.11811	83.6857	781.151	0.205	0.0786667	0.0336667	0.183	0.022	0.126333	0.045	0.171333	0.0566667	67.7248	13.1883	632.188	10.7353	2.25333	5.55	3.90167	25.8333
91	27.5333	0.566667	12.1576	63.2152	3.22798	55.1131	430.437	82.9222	1.54841	26.3067	205.176	93.395	4.77639	81.4198	635.613	0.205333	0.092	0.038	0.179	0.0263333	0.113333	0.054	0.167333	0.0656667	56.8686	15.3748	443.932	12.831	2.36833	6.39	4.37917	28.3333
92	24.9333	0.466667	9.126	56.9306	2.83697	50.4196	442.349	57.9505	1.20495	21.3481	187.439	81.0329	4.04192	71.7677	629.788	0.145	0.0726667	0.042	0.128333	0.0166667	0.0723333	0.0306667	0.103	0.056	60.606	14.9178	526.205	11.4717	2.10833	6.49333	4.30083	24
93	25.5	0.466667	9.2612	78.9335	3.23825	68.857	539.387	80.5014	0.686014	14.5827	114.248	95.65	3.92426	83.4397	653.636	0.125333	0.039	0.0206667	0.109333	0.016	0.0863333	0.0183333	0.104667	0.023	70.9242	12.321	555.572	12.7646	1.99667	4.79	3.39333	24.3333
94	31.5	0.466667	11.4712	72.7332	3.36146	63.6341	525.866	76.641	1.0667	17.22	145.551	92.3786	5.23644	80.8541	671.417	0.210333	0.0763333	0.0403333	0.184667	0.0256667	0.134	0.036	0.17	0.0506667	53.0091	16.9618	437.627	12.3806	2.00333	5.83	3.91667	23.6667
96	29.8	0.5	11.622	69.7131	3.48565	60.837	479.66	80.8753	1.22855	21.3871	170.107	94.1881	4.71419	82.2241	649.767	0.192	0.0753333	0.0343333	0.167667	0.0243333	0.116667	0.041	0.157667	0.051	58.602	15.0473	461.643	12.6961	2.23333	6.1	4.16667	20.6667
97	28.3	0.5	11.037	58.23	2.8887	51.5967	467.614	65.015	1.33173	23.7171	217.424	84.9622	4.22043	75.3137	685.038	0.178667	0.0866667	0.0443333	0.158667	0.02	0.092	0.0423333	0.134333	0.0666667	59.5143	14.9731	540.341	11.2434	2.19167	6.59333	4.3925	25.3333
98	36.9	0.5	14.391	59.9177	3.6301	52.395	421.416	51.2028	1.24341	17.9853	144.813	80.4837	4.87351	70.3804	566.229	0.287	0.136667	0.085	0.251	0.036	0.150333	0.0516667	0.202	0.100667	48.2016	18.1767	386.594	12.5399	2.15333	6.29	4.22167	21.1667
99	30.1667	0.566667	13.4186	77.9109	3.99806	67.7034	517.907	75.5688	0.82775	14.0984	107.772	94.1354	4.82581	81.8018	625.679	0.228	0.0733333	0.0386667	0.198	0.03	0.154667	0.0346667	0.189333	0.0433333	56.4983	15.3891	433.14	13.0713	1.97833	5.66667	3.8225	24.3333
102	28.4667	0.6	13.3224	83.0128	4.40754	74.2583	704.643	85.1198	0.765106	13.0018	122.891	97.5542	5.17265	87.2602	827.534	0.227333	0.0583333	0.029	0.203333	0.024	0.169	0.0293333	0.198333	0.0343333	56.3508	15.9084	533.791	10.5517	2.15	6.02333	4.08667	25
104	29.9667	0.7	16.3618	92.0488	5.03016	81.1599	687.82	80.0177	0.313679	5.19103	45.4023	97.9109	5.34384	86.3509	733.222	0.292667	0.0543333	0.04	0.258	0.0346667	0.238333	0.0143333	0.252667	0.0196667	53.9316	16.3759	458.694	11.8009	2.23	6.625	4.4275	24
105	26.3	0.6	12.3578	90.4429	4.66398	79.1271	632.5	65.8333	0.364329	6.0127	47.7778	97.3213	5.02831	85.1398	680.278	0.212667	0.0453333	0.031	0.186	0.0266667	0.167333	0.0143333	0.181667	0.0186667	56.9748	15.4931	455.486	12.5142	2.125	5.60333	3.86417	25.8333
114	29.4333	0.533333	12.2356	77.4123	4.84851	68.1122	567.396	90.9201	1.27722	18.1281	150.517	98.0248	6.12573	86.2403	717.912	0.249667	0.0796667	0.0343333	0.219667	0.03	0.17	0.0453333	0.215333	0.0496667	47.0678	18.7499	391.654	12.0216	2.2575	6.825	4.54125	21.75
115	39.5	0.566667	17.4434	47.4357	2.74313	42.2315	386.562	23.9301	0.724725	11.1511	101.956	59.9626	3.46785	53.3826	488.518	0.326	0.188333	0.152	0.290333	0.0356667	0.137667	0.0363333	0.174	0.152667	51.3902	17.3647	471.747	10.9594	2.175	5.61	3.8925	21.5
124	27.8667	0.633333	13.754	71.0458	3.53004	62.5251	523.016	86.0447	1.23593	21.8866	183.73	95.9029	4.76597	84.4117	706.746	0.224	0.0843333	0.035	0.197333	0.0266667	0.139667	0.0493333	0.189	0.0576667	59.1156	14.9161	494.464	11.9743	2.32667	5.70333	4.015	25
127	25.2667	0.566667	11.284	58.06	2.72195	50.7629	405.263	70.6113	1.3885	25.9011	206.579	87.6892	4.11045	76.6641	611.842	0.175333	0.0866667	0.041	0.153	0.0223333	0.0886667	0.0456667	0.134333	0.0643333	62.2146	14.0622	497.142	12.57	2.125	5.88	4.0025	25.3333
128	27.1	0.666667	14.0556	73.3142	2.92197	63.5044	475.182	89.3693	0.938612	20.4616	154.559	96.9031	3.86058	83.966	629.741	0.187	0.0676667	0.03	0.162	0.025	0.119333	0.0376667	0.157	0.0426667	72.587	11.956	544.779	13.3416	2.06	5.52	3.79	30.1667
143	31.7333	0.666667	16.5646	59.7862	3.86926	53.7617	533.857	78.6381	2.0376	28.33	281.806	91.2847	5.90686	82.0917	815.663	0.344	0.158333	0.061	0.309333	0.0346667	0.185667	0.0973333	0.283	0.123667	46.3384	19.4093	460.722	10.0652	2.4175	6.745	4.58125	26.75
144	30.6333	0.5	11.947	91.9551	4.80793	81.3772	708.206	88.8889	0.367511	6.47235	56.8095	99.2607	5.17544	87.8496	765.016	0.203	0.0373333	0.0246667	0.179667	0.0233333	0.165667	0.0126667	0.178333	0.014	56.8469	15.6427	495.06	11.4941	2.115	6.01667	4.06583	19.1667
146	30.4667	0.6	14.2584	58.7381	3.08291	52.2162	470.342	58.4249	1.26718	21.4559	193.231	82.8745	4.35009	73.6721	663.573	0.243	0.116333	0.064	0.216	0.027	0.126667	0.0523333	0.179	0.0893333	56.4628	15.7465	508.654	11.1035	2.08	5.90333	3.99167	26.1667
CS	32.5	0.533333	13.4602	50.1534	2.96829	44.6023	403.705	26.9435	0.797821	12.0615	109.844	63.7064	3.76611	56.6638	513.548	0.257	0.142333	0.111333	0.228667	0.0283333	0.114667	0.031	0.145667	0.114	50.9799	17.7482	459.561	11.0615				25
SQ	21.8333	0.5	8.515	75.1176	3.53326	64.3363	448.928	101.075	1.18941	21.5761	151.072	100.295	4.72266	85.9124	600	0.134667	0.048	0.019	0.115333	0.0193333	0.0866667	0.029	0.115667	0.0286667	60.8068	14.124	424.394	14.3421				26.3333

## Sheet: All data 2007
	rep 1 2007	rep 2 2007	rep 3 2007	Mean 2007	rep 1 2007	rep 2 2007	rep 3 2007	Mean 2007	rep 1	rep 2	rep 3	Mean	rep 1	rep 2	rep 3	Mean	rep 1	rep 2	rep 3	Mean	rep 1	rep 2	rep 3	Mean	rep 1	rep 2	rep 3	Mean	rep 1 2007	rep 2 2007	rep 3 2007	Mean 2007	rep 1 2007	rep 2 2007	rep 3 2007	Mean 2007	rep 1	rep 2	rep 3	Mean	rep 1	rep 2	rep 3	Mean	rep 1 2007	rep 2 2007	rep 3 2007	Mean 2007	rep 1 2007
CSDH	length	length	lenghth	length	width	width	width	width	leaf area	leaf area	leaf area	leaf area	FW after 0h	FW after 0h	FW after 0h	FW after 0h	Initial FW/cm2	Initial FW/cm2	Initial FW/cm2	Initial FW/cm2	FW after 3h	FW after 3h	FW after 3h	FW after 3h	FW after 6h	FW after 6h	FW after 6h	FW after 6h	Initial water	Initial water	Initial water	Initial water	3-6h water loss	3-6h water loss	3-6h water loss	3-6h water loss	DW (after 48h)	DW (after 48h)	DW (after 48h)	DW (after 48h)	0-3h water loss	0-3h water loss	0-3h water loss	0-3h water loss	0-6h wt loss	0-6h wt loss	0-6h wt loss	0-6h wt loss	3h water
1	32.9	29.9	30.5	31.1	0.6	0.4	0.6	0.533333	15.3972	9.3288	14.274	13	0.264	0.18	0.222	0.222	17.146	19.2951	15.5528	17.3313	0.152	0.111	0.137	0.133333	0.125	0.095	0.117	0.112333	0.233	0.158	0.193	0.194667	0.027	0.016	0.02	0.021	0.031	0.022	0.029	0.0273333	0.112	0.069	0.085	0.0886667	0.139	0.085	0.105	0.109667	0.121
2	30.7	30.6	34.9	32.0667	0.6	0.6	0.7	0.633333	14.3676	14.3208	19.0554	15.9146	0.242	0.243	0.333	0.272667	16.8435	16.9683	17.4754	17.0957	0.147	0.151	0.203	0.167	0.09	0.087	0.111	0.096	0.216	0.215	0.295	0.242	0.057	0.064	0.092	0.071	0.026	0.028	0.038	0.0306667	0.095	0.092	0.13	0.105667	0.152	0.156	0.222	0.176667	0.121
3	29.7	28.3	25.8	27.9333	0.5	0.5	0.4	0.466667	11.583	11.037	8.0496	10.2232	0.235	0.229	0.15	0.204667	20.2884	20.7484	18.6345	19.8904	0.137	0.136	0.084	0.119	0.04	0.049	0.06	0.0496667	0.207	0.206	0.133	0.182	0.097	0.087	0.024	0.0693333	0.028	0.023	0.017	0.0226667	0.098	0.093	0.066	0.0856667	0.195	0.18	0.09	0.155	0.109
4	33.7	31.3	31	32	0.6	0.5	0.5	0.533333	15.7716	12.207	12.09	13.3562	0.257	0.249	0.23	0.245333	16.2951	20.3981	19.024	18.5724	0.198	0.172	0.153	0.174333	0.166	0.149	0.132	0.149	0.224	0.22	0.203	0.215667	0.032	0.023	0.021	0.0253333	0.033	0.029	0.027	0.0296667	0.059	0.077	0.077	0.071	0.091	0.1	0.098	0.0963333	0.165
5	31.1	31.2	34.3	32.2	0.7	0.7	0.7	0.7	16.9806	17.0352	18.7278	17.5812	0.276	0.27	0.29	0.278667	16.2538	15.8495	15.485	15.8628	0.172	0.172	0.186	0.176667	0.125	0.128	0.125	0.126	0.243	0.238	0.257	0.246	0.047	0.044	0.061	0.0506667	0.033	0.032	0.033	0.0326667	0.104	0.098	0.104	0.102	0.151	0.142	0.165	0.152667	0.139
6
7	25.3	32.6	30.2	29.3667	0.5	0.5	0.5	0.5	9.867	12.714	11.778	11.453	0.17	0.19	0.187	0.182333	17.2291	14.9442	15.8771	16.0168	0.114	0.135	0.128	0.125667	0.093	0.111	0.106	0.103333	0.151	0.166	0.163	0.16	0.021	0.024	0.022	0.0223333	0.019	0.024	0.024	0.0223333	0.056	0.055	0.059	0.0566667	0.077	0.079	0.081	0.079	0.095
8	29.7	28.6	26.5	28.2667	0.5	0.6	0.6	0.566667	11.583	13.3848	12.402	12.4566	0.196	0.192	0.171	0.186333	16.9214	14.3446	13.7881	15.018	0.105	0.111	0.106	0.107333	0.078	0.083	0.085	0.082	0.17	0.165	0.146	0.160333	0.027	0.028	0.021	0.0253333	0.026	0.027	0.025	0.026	0.091	0.081	0.065	0.079	0.118	0.109	0.086	0.104333	0.079
9	22.2	26.5	26.1	24.9333	0.5	0.6	0.5	0.533333	8.658	12.402	10.179	10.413	0.125	0.181	0.158	0.154667	14.4375	14.5944	15.5222	14.8514	0.08	0.117	0.095	0.0973333	0.063	0.093	0.075	0.077	0.109	0.157	0.136	0.134	0.017	0.024	0.02	0.0203333	0.016	0.024	0.022	0.0206667	0.045	0.064	0.063	0.0573333	0.062	0.088	0.083	0.0776667	0.064
10	30.2	31.4	30.6	30.7333	0.5	0.6	0.6	0.566667	11.778	14.6952	14.3208	13.598	0.209	0.249	0.262	0.24	17.7449	16.9443	18.2951	17.6614	0.118	0.138	0.178	0.144667	0.049	0.06	0.067	0.0586667	0.185	0.22	0.22	0.208333	0.069	0.078	0.111	0.086	0.024	0.029	0.042	0.0316667	0.091	0.111	0.084	0.0953333	0.16	0.189	0.195	0.181333	0.094
11	31.2	30.4	28.1	29.9	0.5	0.5	0.5	0.5	12.168	11.856	10.959	11.661	0.227	0.237	0.182	0.215333	18.6555	19.9899	16.6074	18.4176	0.102	0.111	0.098	0.103667	0.063	0.068	0.068	0.0663333	0.2	0.206	0.16	0.188667	0.039	0.043	0.03	0.0373333	0.027	0.031	0.022	0.0266667	0.125	0.126	0.084	0.111667	0.164	0.169	0.114	0.149	0.075
12	31.4	28.8	30.3	30.1667	0.7	0.6	0.6	0.633333	17.1444	13.4784	14.1804	14.9344	0.305	0.253	0.24	0.266	17.7901	18.7708	16.9248	17.8285	0.19	0.152	0.153	0.165	0.167	0.125	0.138	0.143333	0.265	0.222	0.208	0.231667	0.023	0.027	0.015	0.0216667	0.04	0.031	0.032	0.0343333	0.115	0.101	0.087	0.101	0.138	0.128	0.102	0.122667	0.15
13	33.8	31.2	31.9	32.3	0.6	0.5	0.6	0.566667	15.8184	12.168	14.9292	14.3052	0.278	0.216	0.228	0.240667	17.5745	17.7515	15.2721	16.866	0.123	0.1	0.096	0.106333	0.057	0.044	0.037	0.046	0.244	0.192	0.2	0.212	0.066	0.056	0.059	0.0603333	0.034	0.024	0.028	0.0286667	0.155	0.116	0.132	0.134333	0.221	0.172	0.191	0.194667	0.089
14	32.4	30.6	36.2	33.0667	0.7	0.6	0.7	0.666667	17.6904	14.3208	19.7652	17.2588	0.299	0.253	0.337	0.296333	16.9018	17.6666	17.0502	17.2062	0.154	0.114	0.158	0.142	0.066	0.059	0.084	0.0696667	0.263	0.222	0.294	0.259667	0.088	0.055	0.074	0.0723333	0.036	0.031	0.043	0.0366667	0.145	0.139	0.179	0.154333	0.233	0.194	0.253	0.226667	0.118
15	26.6	26.6	26.4	26.5333	0.5	0.5	0.5	0.5	10.374	10.374	10.296	10.348	0.202	0.19	0.178	0.19	19.4718	18.315	17.2883	18.3583	0.09	0.091	0.091	0.0906667	0.034	0.04	0.043	0.039	0.178	0.166	0.155	0.166333	0.056	0.051	0.048	0.0516667	0.024	0.024	0.023	0.0236667	0.112	0.099	0.087	0.0993333	0.168	0.15	0.135	0.151	0.066
16	30.4	27.6	28.5	28.8333	0.5	0.5	0.5	0.5	11.856	10.764	11.115	11.245	0.207	0.158	0.196	0.187	17.4595	14.6786	17.6338	16.5906	0.108	0.077	0.09	0.0916667	0.059	0.037	0.041	0.0456667	0.179	0.135	0.168	0.160667	0.049	0.04	0.049	0.046	0.028	0.023	0.028	0.0263333	0.099	0.081	0.106	0.0953333	0.148	0.121	0.155	0.141333	0.08
17	25.2	28.2	27.4	26.9333	0.6	0.6	0.5	0.566667	11.7936	13.1976	10.686	11.8924	0.187	0.202	0.19	0.193	15.8561	15.3058	17.7803	16.314	0.097	0.115	0.131	0.114333	0.058	0.078	0.102	0.0793333	0.162	0.173	0.162	0.165667	0.039	0.037	0.029	0.035	0.025	0.029	0.028	0.0273333	0.09	0.087	0.059	0.0786667	0.129	0.124	0.088	0.113667	0.072
18	31.2	29.4	31.4	30.6667	0.6	0.6	0.6	0.6	14.6016	13.7592	14.6952	14.352	0.255	0.267	0.271	0.264333	17.4638	19.4052	18.4414	18.4368	0.102	0.145	0.083	0.11	0.037	0.06	0.037	0.0446667	0.225	0.236	0.239	0.233333	0.065	0.085	0.046	0.0653333	0.03	0.031	0.032	0.031	0.153	0.122	0.188	0.154333	0.218	0.207	0.234	0.219667	0.072
19	29.1	30.2	28.7	29.3333	0.5	0.5	0.5	0.5	11.349	11.778	11.193	11.44	0.22	0.211	0.206	0.212333	19.385	17.9148	18.4044	18.568	0.12	0.116	0.107	0.114333	0.072	0.062	0.07	0.068	0.195	0.187	0.182	0.188	0.048	0.054	0.037	0.0463333	0.025	0.024	0.024	0.0243333	0.1	0.095	0.099	0.098	0.148	0.149	0.136	0.144333	0.095
20	31.1	27.1	28.7	28.9667	0.7	0.7	0.7	0.7	16.9806	14.7966	15.6702	15.8158	0.291	0.24	0.253	0.261333	17.1372	16.2199	16.1453	16.5008	0.13	0.136	0.131	0.132333	0.09	0.101	0.102	0.0976667	0.257	0.212	0.223	0.230667	0.04	0.035	0.029	0.0346667	0.034	0.028	0.03	0.0306667	0.161	0.104	0.122	0.129	0.201	0.139	0.151	0.163667	0.096
21	25.3	28.7	26.1	26.7	0.6	0.6	0.6	0.6	11.8404	13.4316	12.2148	12.4956	0.173	0.212	0.186	0.190333	14.611	15.7837	15.2274	15.2074	0.072	0.081	0.084	0.079	0.029	0.034	0.025	0.0293333	0.151	0.185	0.164	0.166667	0.043	0.047	0.059	0.0496667	0.022	0.027	0.022	0.0236667	0.101	0.131	0.102	0.111333	0.144	0.178	0.161	0.161	0.05
22	30.8	30	28.9	29.9	0.5	0.6	0.4	0.5	12.012	14.04	9.0168	11.6896	0.262	0.271	0.184	0.239	21.8115	19.302	20.4064	20.5066	0.14	0.14	0.072	0.117333	0.081	0.069	0.02	0.0566667	0.233	0.242	0.163	0.212667	0.059	0.071	0.052	0.0606667	0.029	0.029	0.021	0.0263333	0.122	0.131	0.112	0.121667	0.181	0.202	0.164	0.182333	0.111
23	30.4	27.9	28	28.7667	0.5	0.6	0.5	0.533333	11.856	13.0572	10.92	11.9444	0.184	0.191	0.153	0.176	15.5196	14.6279	14.011	14.7195	0.098	0.11	0.084	0.0973333	0.052	0.072	0.052	0.0586667	0.158	0.166	0.132	0.152	0.046	0.038	0.032	0.0386667	0.026	0.025	0.021	0.024	0.086	0.081	0.069	0.0786667	0.132	0.119	0.101	0.117333	0.072
24	31.6	31.6	29.1	30.7667	0.6	0.6	0.5	0.566667	14.7888	14.7888	11.349	13.6422	0.278	0.244	0.212	0.244667	18.798	16.499	18.6801	17.9923	0.166	0.152	0.106	0.141333	0.121	0.113	0.066	0.1	0.241	0.212	0.186	0.213	0.045	0.039	0.04	0.0413333	0.037	0.032	0.026	0.0316667	0.112	0.092	0.106	0.103333	0.157	0.131	0.146	0.144667	0.129
25	37.9	37.3	36.5	37.2333	0.6	0.5	0.5	0.533333	17.7372	14.547	14.235	15.5064	0.323	0.321	0.293	0.312333	18.2103	22.0664	20.5831	20.2866	0.184	0.182	0.16	0.175333	0.135	0.139	0.119	0.131	0.291	0.289	0.264	0.281333	0.049	0.043	0.041	0.0443333	0.032	0.032	0.029	0.031	0.139	0.139	0.133	0.137	0.188	0.182	0.174	0.181333	0.152
26	36.1	37.4	39.5	37.6667	0.5	0.5	0.5	0.5	14.079	14.586	15.405	14.69	0.287	0.262	0.318	0.289	20.385	17.9624	20.6426	19.6633	0.181	0.166	0.21	0.185667	0.149	0.131	0.174	0.151333	0.256	0.233	0.285	0.258	0.032	0.035	0.036	0.0343333	0.031	0.029	0.033	0.031	0.106	0.096	0.108	0.103333	0.138	0.131	0.144	0.137667	0.15
27	35.3	35.8	35.5	35.5333	0.6	0.6	0.6	0.6	16.5204	16.7544	16.614	16.6296	0.301	0.294	0.318	0.304333	18.2199	17.5476	19.1405	18.3027	0.173	0.173	0.154	0.166667	0.083	0.075	0.073	0.077	0.264	0.253	0.278	0.265	0.09	0.098	0.081	0.0896667	0.037	0.041	0.04	0.0393333	0.128	0.121	0.164	0.137667	0.218	0.219	0.245	0.227333	0.136
28	37.2	36	35.1	36.1	0.7	0.7	0.7	0.7	20.3112	19.656	19.1646	19.7106	0.343	0.352	0.334	0.343	16.8872	17.908	17.428	17.4077	0.204	0.189	0.194	0.195667	0.156	0.126	0.145	0.142333	0.302	0.311	0.295	0.302667	0.048	0.063	0.049	0.0533333	0.041	0.041	0.039	0.0403333	0.139	0.163	0.14	0.147333	0.187	0.226	0.189	0.200667	0.163
29	28.8	30.8	30.9	30.1667	0.4	0.5	0.5	0.466667	8.9856	12.012	12.051	11.0162	0.159	0.209	0.216	0.194667	17.695	17.3993	17.9238	17.6727	0.072	0.115	0.116	0.101	0.026	0.056	0.058	0.0466667	0.143	0.185	0.192	0.173333	0.046	0.059	0.058	0.0543333	0.016	0.024	0.024	0.0213333	0.087	0.094	0.1	0.0936667	0.133	0.153	0.158	0.148	0.056
30	22	23.1	25.4	23.5	0.5	0.5	0.5	0.5	8.58	9.009	9.906	9.165	0.116	0.143	0.153	0.137333	13.5198	15.873	15.4452	14.946	0.065	0.078	0.077	0.0733333	0.042	0.056	0.046	0.048	0.102	0.125	0.135	0.120667	0.023	0.022	0.031	0.0253333	0.014	0.018	0.018	0.0166667	0.051	0.065	0.076	0.064	0.074	0.087	0.107	0.0893333	0.051
31	29.1	31	32.1	30.7333	0.7	0.6	0.7	0.666667	15.8886	14.508	17.5266	15.9744	0.275	0.247	0.304	0.275333	17.308	17.0251	17.3451	17.2261	0.13	0.131	0.156	0.139	0.067	0.072	0.077	0.072	0.246	0.218	0.271	0.245	0.063	0.059	0.079	0.067	0.029	0.029	0.033	0.0303333	0.145	0.116	0.148	0.136333	0.208	0.175	0.227	0.203333	0.101
32	25.4	29.5	28.4	27.7667	0.6	0.5	0.5	0.533333	11.8872	11.505	11.076	11.4894	0.201	0.208	0.209	0.206	16.9089	18.0791	18.8696	17.9526	0.059	0.058	0.076	0.0643333	0.029	0.03	0.039	0.0326667	0.18	0.187	0.188	0.185	0.03	0.028	0.037	0.0316667	0.021	0.021	0.021	0.021	0.142	0.15	0.133	0.141667	0.172	0.178	0.17	0.173333	0.038
33	26.6	31.4	29.5	29.1667	0.6	0.6	0.5	0.566667	12.4488	14.6952	11.505	12.883	0.219	0.222	0.205	0.215333	17.5921	15.107	17.8183	16.8391	0.102	0.112	0.096	0.103333	0.039	0.04	0.04	0.0396667	0.193	0.196	0.18	0.189667	0.063	0.072	0.056	0.0636667	0.026	0.026	0.025	0.0256667	0.117	0.11	0.109	0.112	0.18	0.182	0.165	0.175667	0.076
34	31.8	28.4	27.9	29.3667	0.6	0.5	0.6	0.566667	14.8824	11.076	13.0572	13.0052	0.264	0.214	0.231	0.236333	17.7391	19.3211	17.6914	18.2505	0.097	0.081	0.102	0.0933333	0.043	0.034	0.042	0.0396667	0.231	0.188	0.202	0.207	0.054	0.047	0.06	0.0536667	0.033	0.026	0.029	0.0293333	0.167	0.133	0.129	0.143	0.221	0.18	0.189	0.196667	0.064
35	29.5	25.7	24.6	26.6	0.5	0.5	0.5	0.5	11.505	10.023	9.594	10.374	0.203	0.163	0.164	0.176667	17.6445	16.2626	17.094	17.0004	0.089	0.09	0.067	0.082	0.046	0.054	0.03	0.0433333	0.174	0.142	0.141	0.152333	0.043	0.036	0.037	0.0386667	0.029	0.021	0.023	0.0243333	0.114	0.073	0.097	0.0946667	0.157	0.109	0.134	0.133333	0.06
36	24.7	26.5	31.4	27.5333	0.5	0.4	0.8	0.566667	9.633	8.268	19.5936	12.4982	0.161	0.173	0.321	0.218333	16.7134	20.924	16.3829	18.0068	0.064	0.057	0.15	0.0903333	0.023	0.023	0.073	0.0396667	0.142	0.153	0.279	0.191333	0.041	0.034	0.077	0.0506667	0.019	0.02	0.042	0.027	0.097	0.116	0.171	0.128	0.138	0.15	0.248	0.178667	0.045
37	25.6	26.1	25.9	25.8667	0.5	0.5	0.5	0.5	9.984	10.179	10.101	10.088	0.167	0.174	0.178	0.173	16.7268	17.094	17.622	17.1476	0.043	0.057	0.054	0.0513333	0.024	0.026	0.028	0.026	0.144	0.152	0.152	0.149333	0.019	0.031	0.026	0.0253333	0.023	0.022	0.026	0.0236667	0.124	0.117	0.124	0.121667	0.143	0.148	0.15	0.147	0.02
38	23.1	19.3	22.2	21.5333	0.4	0.4	0.4	0.4	7.2072	6.0216	6.9264	6.7184	0.115	0.084	0.098	0.099	15.9563	13.9498	14.1488	14.6849	0.038	0.023	0.045	0.0353333	0.015	0.015	0.015	0.015	0.1	0.075	0.086	0.087	0.023	0.008	0.03	0.0203333	0.015	0.009	0.012	0.012	0.077	0.061	0.053	0.0636667	0.1	0.069	0.083	0.084	0.023
39	24.4	27.2	26.9	26.1667	0.5	0.6	0.7	0.6	9.516	12.7296	14.6874	12.311	0.172	0.199	0.234	0.201667	18.0748	15.6329	15.932	16.5466	0.067	0.068	0.097	0.0773333	0.025	0.045	0.031	0.0336667	0.152	0.17	0.208	0.176667	0.042	0.023	0.066	0.0436667	0.02	0.029	0.026	0.025	0.105	0.131	0.137	0.124333	0.147	0.154	0.203	0.168	0.047
40	22.3	27.7	25.3	25.1	0.5	0.6	0.6	0.566667	8.697	12.9636	11.8404	11.167	0.138	0.225	0.18	0.181	15.8675	17.3563	15.2022	16.142	0.04	0.098	0.074	0.0706667	0.021	0.046	0.039	0.0353333	0.121	0.196	0.156	0.157667	0.019	0.052	0.035	0.0353333	0.017	0.029	0.024	0.0233333	0.098	0.127	0.106	0.110333	0.117	0.179	0.141	0.145667	0.023
41	26.2	24.9	28.3	26.4667	0.6	0.6	0.8	0.666667	12.2616	11.6532	17.6592	13.858	0.282	0.267	0.373	0.307333	22.9986	22.9122	21.1221	22.3443	0.141	0.139	0.214	0.164667	0.103	0.104	0.162	0.123	0.253	0.238	0.328	0.273	0.038	0.035	0.052	0.0416667	0.029	0.029	0.045	0.0343333	0.141	0.128	0.159	0.142667	0.179	0.163	0.211	0.184333	0.112
42	21.7	26.2	21.5	23.1333	0.5	0.5	0.5	0.5	8.463	10.218	8.385	9.022	0.171	0.212	0.164	0.182333	20.2056	20.7477	19.5587	20.1707	0.026	0.043	0.041	0.0366667	0.022	0.028	0.023	0.0243333	0.152	0.188	0.146	0.162	0.004	0.015	0.018	0.0123333	0.019	0.024	0.018	0.0203333	0.145	0.169	0.123	0.145667	0.149	0.184	0.141	0.158	0.007
43	24	23.1	27.4	24.8333	0.4	0.5	0.6	0.5	7.488	9.009	12.8232	9.7734	0.103	0.127	0.2	0.143333	13.7553	14.097	15.5967	14.483	0.018	0.039	0.069	0.042	0.016	0.019	0.031	0.022	0.091	0.112	0.178	0.127	0.002	0.02	0.038	0.02	0.012	0.015	0.022	0.0163333	0.085	0.088	0.131	0.101333	0.087	0.108	0.169	0.121333	0.006
44	24.4			24.4	0.4			0.4	7.6128			7.6128	0.135			0.135	17.7333			17.7333	0.035			0.035	0.019			0.019	0.117			0.117	0.016	0	0	0.00533333	0.018			0.018	0.1			0.1	0.116			0.116	0.017
45	33.8	34.5	32.9	33.7333	0.5	0.5	0.6	0.533333	13.182	13.455	15.3972	14.0114	0.269	0.242	0.267	0.259333	20.4066	17.9859	17.3408	18.5778	0.115	0.147	0.126	0.129333	0.067	0.111	0.073	0.0836667	0.24	0.212	0.237	0.229667	0.048	0.036	0.053	0.0456667	0.029	0.03	0.03	0.0296667	0.154	0.095	0.141	0.13	0.202	0.131	0.194	0.175667	0.086
46	26.5	28.9	25.7	27.0333	0.5	0.6	0.6	0.566667	10.335	13.5252	12.0276	11.9626	0.18	0.228	0.224	0.210667	17.4165	16.8574	18.6238	17.6326	0.093	0.13	0.133	0.118667	0.064	0.1	0.103	0.089	0.161	0.203	0.199	0.187667	0.029	0.03	0.03	0.0296667	0.019	0.025	0.025	0.023	0.087	0.098	0.091	0.092	0.116	0.128	0.121	0.121667	0.074
47	25	18.6	19.5	21.0333	0.5	0.3	0.3	0.366667	9.75	4.3524	4.563	6.2218	0.182	0.076	0.061	0.106333	18.6667	17.4616	13.3684	16.4989	0.088	0.024	0.024	0.0453333	0.034	0.009	0.007	0.0166667	0.161	0.069	0.054	0.0946667	0.054	0.015	0.017	0.0286667	0.021	0.007	0.007	0.0116667	0.094	0.052	0.037	0.061	0.148	0.067	0.054	0.0896667	0.067
48	28.3	27.2	26.4	27.3	0.6	0.5	0.6	0.566667	13.2444	10.608	12.3552	12.0692	0.2	0.169	0.195	0.188	15.1007	15.9314	15.7828	15.605	0.089	0.088	0.093	0.09	0.045	0.054	0.055	0.0513333	0.184	0.148	0.172	0.168	0.044	0.034	0.038	0.0386667	0.016	0.021	0.023	0.02	0.111	0.081	0.102	0.098	0.155	0.115	0.14	0.136667	0.073
49	22.6	26	26.5	25.0333	0.5	0.6	0.6	0.566667	8.814	12.168	12.402	11.128	0.131	0.218	0.223	0.190667	14.8627	17.9158	17.981	16.9198	0.068	0.116	0.114	0.0993333	0.044	0.08	0.073	0.0656667	0.109	0.187	0.192	0.162667	0.024	0.036	0.041	0.0336667	0.022	0.031	0.031	0.028	0.063	0.102	0.109	0.0913333	0.087	0.138	0.15	0.125	0.046
50	29.2	26.8	26	27.3333	0.5	0.5	0.4	0.466667	11.388	10.452	8.112	9.984	0.246	0.184	0.178	0.202667	21.6017	17.6043	21.9428	20.3829	0.123	0.089	0.088	0.1	0.07	0.037	0.045	0.0506667	0.219	0.162	0.156	0.179	0.053	0.052	0.043	0.0493333	0.027	0.022	0.022	0.0236667	0.123	0.095	0.09	0.102667	0.176	0.147	0.133	0.152	0.096
51	25	25.5	23.8	24.7667	0.5	0.6	0.4	0.5	9.75	11.934	7.4256	9.7032	0.174	0.19	0.139	0.167667	17.8462	15.9209	18.719	17.4954	0.078	0.056	0.067	0.067	0.023	0.021	0.021	0.0216667	0.155	0.17	0.123	0.149333	0.055	0.035	0.046	0.0453333	0.019	0.02	0.016	0.0183333	0.096	0.134	0.072	0.100667	0.151	0.169	0.118	0.146	0.059
52	29	28	28.5	28.5	0.6	0.5	0.6	0.566667	13.572	10.92	13.338	12.61	0.229	0.183	0.217	0.209667	16.873	16.7582	16.2693	16.6335	0.123	0.107	0.117	0.115667	0.082	0.074	0.072	0.076	0.201	0.158	0.189	0.182667	0.041	0.033	0.045	0.0396667	0.028	0.025	0.028	0.027	0.106	0.076	0.1	0.094	0.147	0.109	0.145	0.133667	0.095
53	29.9	30.8	32.5	31.0667	0.5	0.5	0.8	0.6	11.661	12.012	20.28	14.651	0.219	0.222	0.334	0.258333	18.7806	18.4815	16.4694	17.9105	0.126	0.131	0.217	0.158	0.081	0.09	0.16	0.110333	0.192	0.194	0.287	0.224333	0.045	0.041	0.057	0.0476667	0.027	0.028	0.047	0.034	0.093	0.091	0.117	0.100333	0.138	0.132	0.174	0.148	0.099
54	32.3	31.7	33.6	32.5333	0.6	0.6	0.5	0.566667	15.1164	14.8356	13.104	14.352	0.289	0.254	0.244	0.262333	19.1183	17.121	18.6203	18.2865	0.165	0.149	0.144	0.152667	0.102	0.085	0.074	0.087	0.256	0.223	0.215	0.231333	0.063	0.064	0.07	0.0656667	0.033	0.031	0.029	0.031	0.124	0.105	0.1	0.109667	0.187	0.169	0.17	0.175333	0.132
55	31.8	28.5	26.3	28.8667	0.5	0.6	0.6	0.566667	12.402	13.338	12.3084	12.6828	0.261	0.271	0.232	0.254667	21.045	20.3179	18.8489	20.0706	0.077	0.099	0.095	0.0903333	0.04	0.05	0.032	0.0406667	0.23	0.24	0.204	0.224667	0.037	0.049	0.063	0.0496667	0.031	0.031	0.028	0.03	0.184	0.172	0.137	0.164333	0.221	0.221	0.2	0.214	0.046
56	25.6	26.5	27.9	26.6667	0.5	0.5	0.5	0.5	9.984	10.335	10.881	10.4	0.157	0.182	0.191	0.176667	15.7252	17.6101	17.5535	16.9629	0.083	0.102	0.109	0.098	0.053	0.073	0.079	0.0683333	0.138	0.158	0.168	0.154667	0.03	0.029	0.03	0.0296667	0.019	0.024	0.023	0.022	0.074	0.08	0.082	0.0786667	0.104	0.109	0.112	0.108333	0.064
57	28.2	26.5	29.2	27.9667	0.5	0.5	0.6	0.533333	10.998	10.335	13.6656	11.6662	0.217	0.186	0.226	0.209667	19.7309	17.9971	16.5379	18.0886	0.086	0.079	0.108	0.091	0.037	0.034	0.045	0.0386667	0.188	0.161	0.196	0.181667	0.049	0.045	0.063	0.0523333	0.029	0.025	0.03	0.028	0.131	0.107	0.118	0.118667	0.18	0.152	0.181	0.171	0.057
58	30.7	27.6	32.3	30.2	0.7	0.7	0.6	0.666667	16.7622	15.0696	15.1164	15.6494	0.293	0.245	0.244	0.260667	17.4798	16.2579	16.1414	16.6264	0.101	0.088	0.129	0.106	0.042	0.034	0.046	0.0406667	0.259	0.217	0.213	0.229667	0.059	0.054	0.083	0.0653333	0.034	0.028	0.031	0.031	0.192	0.157	0.115	0.154667	0.251	0.211	0.198	0.22	0.067
59	33.6	33.4	33.6	33.5333	0.7	0.6	0.7	0.666667	18.3456	15.6312	18.3456	17.4408	0.347	0.287	0.336	0.323333	18.9146	18.3607	18.315	18.5301	0.208	0.149	0.161	0.172667	0.112	0.085	0.072	0.0896667	0.303	0.25	0.293	0.282	0.096	0.064	0.089	0.083	0.044	0.037	0.043	0.0413333	0.139	0.138	0.175	0.150667	0.235	0.202	0.264	0.233667	0.164
60	25.9	27	23	25.3	0.4	0.5	0.5	0.466667	8.0808	10.53	8.97	9.1936	0.168	0.179	0.142	0.163	20.79	16.9991	15.8305	17.8732	0.089	0.093	0.082	0.088	0.047	0.049	0.055	0.0503333	0.146	0.16	0.121	0.142333	0.042	0.044	0.027	0.0376667	0.022	0.019	0.021	0.0206667	0.079	0.086	0.06	0.075	0.121	0.13	0.087	0.112667	0.067
61	32.7	25.4	30.2	29.4333	0.7	0.7	0.6	0.666667	17.8542	13.8684	14.1336	15.2854	0.366	0.27	0.288	0.308	20.4994	19.4687	20.377	20.115	0.202	0.157	0.165	0.174667	0.12	0.109	0.098	0.109	0.324	0.24	0.252	0.272	0.082	0.048	0.067	0.0656667	0.042	0.03	0.036	0.036	0.164	0.113	0.123	0.133333	0.246	0.161	0.19	0.199	0.16
62	24.2	25.6	25.4	25.0667	0.4	0.5	0.5	0.466667	7.5504	9.984	9.906	9.1468	0.117	0.154	0.144	0.138333	15.4959	15.4247	14.5366	15.1524	0.067	0.079	0.083	0.0763333	0.048	0.05	0.062	0.0533333	0.101	0.139	0.133	0.124333	0.019	0.029	0.021	0.023	0.016	0.015	0.011	0.014	0.05	0.075	0.061	0.062	0.069	0.104	0.082	0.085	0.051
63	32.4	27.5	29.9	29.9333	0.7	0.6	0.8	0.7	17.6904	12.87	18.6576	16.406	0.339	0.22	0.301	0.286667	19.1629	17.094	16.1328	17.4633	0.185	0.094	0.141	0.14	0.093	0.033	0.062	0.0626667	0.297	0.19	0.261	0.249333	0.092	0.061	0.079	0.0773333	0.042	0.03	0.04	0.0373333	0.154	0.126	0.16	0.146667	0.246	0.187	0.239	0.224	0.143
64	27.6	27.3	30.6	28.5	0.6	0.5	0.5	0.533333	12.9168	10.647	11.934	11.8326	0.172	0.164	0.182	0.172667	13.316	15.4034	15.2505	14.6566	0.082	0.085	0.088	0.085	0.049	0.056	0.061	0.0553333	0.15	0.144	0.158	0.150667	0.033	0.029	0.027	0.0296667	0.022	0.02	0.024	0.022	0.09	0.079	0.094	0.0876667	0.123	0.108	0.121	0.117333	0.06
65	32.7	34.8	34.8	34.1	0.6	0.6	0.6	0.6	15.3036	16.2864	16.2864	15.9588	0.308	0.305	0.311	0.308	20.126	18.7273	19.0957	19.3163	0.143	0.125	0.156	0.141333	0.088	0.065	0.114	0.089	0.279	0.273	0.279	0.277	0.055	0.06	0.042	0.0523333	0.029	0.032	0.032	0.031	0.165	0.18	0.155	0.166667	0.22	0.24	0.197	0.219	0.114
66	28.8	25	32	28.6	0.5	0.5	0.6	0.533333	11.232	9.75	14.976	11.986	0.161	0.154	0.229	0.181333	14.334	15.7949	15.2911	15.14	0.064	0.027	0.098	0.063	0.033	0.021	0.05	0.0346667	0.138	0.133	0.197	0.156	0.031	0.006	0.048	0.0283333	0.023	0.021	0.032	0.0253333	0.097	0.127	0.131	0.118333	0.128	0.133	0.179	0.146667	0.041
67	27.8	26.5	26.5	26.9333	0.5	0.4	0.4	0.433333	10.842	8.268	8.268	9.126	0.184	0.153	0.137	0.158	16.971	18.5051	16.5699	17.3487	0.056	0.065	0.05	0.057	0.026	0.029	0.021	0.0253333	0.16	0.132	0.119	0.137	0.03	0.036	0.029	0.0316667	0.024	0.021	0.018	0.021	0.128	0.088	0.087	0.101	0.158	0.124	0.116	0.132667	0.032
69	26.2	31.4	27.6	28.4	0.6	0.5	0.6	0.566667	12.2616	12.246	12.9168	12.4748	0.172	0.209	0.2	0.193667	14.0275	17.0668	15.4837	15.526	0.095	0.126	0.094	0.105	0.058	0.088	0.044	0.0633333	0.151	0.185	0.176	0.170667	0.037	0.038	0.05	0.0416667	0.021	0.024	0.024	0.023	0.077	0.083	0.106	0.0886667	0.114	0.121	0.156	0.130333	0.074
70	22.4	23.1	20.1	21.8667	0.4	0.4	0.4	0.4	6.9888	7.2072	6.2712	6.8224	0.11	0.12	0.095	0.108333	15.7395	16.65	15.1486	15.846	0.043	0.054	0.029	0.042	0.018	0.02	0.015	0.0176667	0.096	0.104	0.081	0.0936667	0.025	0.034	0.014	0.0243333	0.014	0.016	0.014	0.0146667	0.067	0.066	0.066	0.0663333	0.092	0.1	0.08	0.0906667	0.029
71	32.3	34	31.7	32.6667	0.7	0.8	0.8	0.766667	17.6358	21.216	19.7808	19.5442	0.33	0.347	0.337	0.338	18.7119	16.3556	17.0367	17.3681	0.168	0.181	0.193	0.180667	0.104	0.124	0.142	0.123333	0.291	0.305	0.297	0.297667	0.064	0.057	0.051	0.0573333	0.039	0.042	0.04	0.0403333	0.162	0.166	0.144	0.157333	0.226	0.223	0.195	0.214667	0.129
72	26.1	23.7	24.1	24.6333	0.5	0.4	0.5	0.466667	10.179	7.3944	9.399	8.9908	0.16	0.121	0.164	0.148333	15.7186	16.3637	17.4487	16.5103	0.065	0.043	0.085	0.0643333	0.034	0.022	0.048	0.0346667	0.138	0.106	0.142	0.128667	0.031	0.021	0.037	0.0296667	0.022	0.015	0.022	0.0196667	0.095	0.078	0.079	0.084	0.126	0.099	0.116	0.113667	0.043
80	25.8	24.4	26.1	25.4333	0.5	0.5	0.5	0.5	10.062	9.516	10.179	9.919	0.157	0.136	0.139	0.144	15.6033	14.2917	13.6556	14.5168	0.068	0.042	0.036	0.0486667	0.037	0.02	0.019	0.0253333	0.136	0.119	0.12	0.125	0.031	0.022	0.017	0.0233333	0.021	0.017	0.019	0.019	0.089	0.094	0.103	0.0953333	0.12	0.116	0.12	0.118667	0.047
86	30.9	32.7	34.8	32.8	0.4	0.6	0.5	0.5	9.6408	15.3036	13.572	12.8388	0.211	0.311	0.255	0.259	21.8862	20.322	18.7887	20.3323	0.103	0.168	0.123	0.131333	0.055	0.107	0.068	0.0766667	0.184	0.278	0.224	0.228667	0.048	0.061	0.055	0.0546667	0.027	0.033	0.031	0.0303333	0.108	0.143	0.132	0.127667	0.156	0.204	0.187	0.182333	0.076
87	23.5	27.1	25.1	25.2333	0.5	0.4	0.4	0.433333	9.165	8.4552	7.8312	8.4838	0.12	0.142	0.131	0.131	13.0933	16.7944	16.728	15.5385	0.041	0.062	0.064	0.0556667	0.018	0.033	0.041	0.0306667	0.102	0.128	0.116	0.115333	0.023	0.029	0.023	0.025	0.018	0.014	0.015	0.0156667	0.079	0.08	0.067	0.0753333	0.102	0.109	0.09	0.100333	0.023
88	26.6	24.5	24	25.0333	0.6	0.5	0.5	0.533333	12.4488	9.555	9.36	10.4546	0.187	0.153	0.12	0.153333	15.0215	16.0126	12.8205	14.6182	0.064	0.054	0.028	0.0486667	0.029	0.025	0.015	0.023	0.161	0.132	0.104	0.132333	0.035	0.029	0.013	0.0256667	0.026	0.021	0.016	0.021	0.123	0.099	0.092	0.104667	0.158	0.128	0.105	0.130333	0.038
90	25.4	26.4	27.5	26.4333	0.7	0.7	0.7	0.7	13.8684	14.4144	15.015	14.4326	0.194	0.211	0.21	0.205	13.9886	14.6381	13.986	14.2043	0.064	0.093	0.079	0.0786667	0.024	0.042	0.035	0.0336667	0.173	0.19	0.186	0.183	0.04	0.051	0.044	0.045	0.021	0.021	0.024	0.022	0.13	0.118	0.131	0.126333	0.17	0.169	0.175	0.171333	0.043
91	28	26.6	28	27.5333	0.5	0.6	0.6	0.566667	10.92	12.4488	13.104	12.1576	0.2	0.205	0.211	0.205333	18.315	16.4675	16.102	16.9615	0.1	0.09	0.086	0.092	0.046	0.037	0.031	0.038	0.174	0.178	0.185	0.179	0.054	0.053	0.055	0.054	0.026	0.027	0.026	0.0263333	0.1	0.115	0.125	0.113333	0.154	0.168	0.18	0.167333	0.074
92	27.3	24.5	23	24.9333	0.5	0.5	0.4	0.466667	10.647	9.555	7.176	9.126	0.14	0.164	0.131	0.145	13.1492	17.1638	18.2553	16.1894	0.069	0.093	0.056	0.0726667	0.04	0.062	0.024	0.042	0.123	0.145	0.117	0.128333	0.029	0.031	0.032	0.0306667	0.017	0.019	0.014	0.0166667	0.071	0.071	0.075	0.0723333	0.1	0.102	0.107	0.103	0.052
93	26	24.2	26.3	25.5	0.5	0.5	0.4	0.466667	10.14	9.438	8.2056	9.2612	0.133	0.125	0.118	0.125333	13.1164	13.2443	14.3804	13.5804	0.043	0.034	0.04	0.039	0.021	0.018	0.023	0.0206667	0.116	0.109	0.103	0.109333	0.022	0.016	0.017	0.0183333	0.017	0.016	0.015	0.016	0.09	0.091	0.078	0.0863333	0.112	0.107	0.095	0.104667	0.026
94	31.3	31.6	31.6	31.5	0.4	0.5	0.5	0.466667	9.7656	12.324	12.324	11.4712	0.215	0.185	0.231	0.210333	22.0161	15.0114	18.7439	18.5904	0.052	0.077	0.1	0.0763333	0.03	0.038	0.053	0.0403333	0.187	0.158	0.209	0.184667	0.022	0.039	0.047	0.036	0.028	0.027	0.022	0.0256667	0.163	0.108	0.131	0.134	0.185	0.147	0.178	0.17	0.024
96	28.8	29.6	31	29.8	0.5	0.5	0.5	0.5	11.232	11.544	12.09	11.622	0.212	0.182	0.182	0.192	18.8746	15.7658	15.0538	16.5647	0.086	0.075	0.065	0.0753333	0.042	0.029	0.032	0.0343333	0.186	0.16	0.157	0.167667	0.044	0.046	0.033	0.041	0.026	0.022	0.025	0.0243333	0.126	0.107	0.117	0.116667	0.17	0.153	0.15	0.157667	0.06
97	29.2	27.2	28.5	28.3	0.5	0.5	0.5	0.5	11.388	10.608	11.115	11.037	0.185	0.183	0.168	0.178667	16.2452	17.2511	15.1147	16.2037	0.089	0.096	0.075	0.0866667	0.047	0.052	0.034	0.0443333	0.163	0.167	0.146	0.158667	0.042	0.044	0.041	0.0423333	0.022	0.016	0.022	0.02	0.096	0.087	0.093	0.092	0.138	0.131	0.134	0.134333	0.067
98	39	35	36.7	36.9	0.5	0.5	0.5	0.5	15.21	13.65	14.313	14.391	0.289	0.283	0.289	0.287	19.0007	20.7326	20.1914	19.9749	0.139	0.129	0.142	0.136667	0.086	0.085	0.084	0.085	0.248	0.249	0.256	0.251	0.053	0.044	0.058	0.0516667	0.041	0.034	0.033	0.036	0.15	0.154	0.147	0.150333	0.203	0.198	0.205	0.202	0.098
99	32.2	28.4	29.9	30.1667	0.6	0.4	0.7	0.566667	15.0696	8.8608	16.3254	13.4186	0.26	0.152	0.272	0.228	17.2533	17.1542	16.6612	17.0229	0.071	0.051	0.098	0.0733333	0.037	0.039	0.04	0.0386667	0.224	0.133	0.237	0.198	0.034	0.012	0.058	0.0346667	0.036	0.019	0.035	0.03	0.189	0.101	0.174	0.154667	0.223	0.113	0.232	0.189333	0.035
102	28.1	31.8	25.5	28.4667	0.6	0.6	0.6	0.6	13.1508	14.8824	11.934	13.3224	0.213	0.253	0.216	0.227333	16.1967	16.9999	18.0995	17.0987	0.062	0.062	0.051	0.0583333	0.027	0.033	0.027	0.029	0.19	0.226	0.194	0.203333	0.035	0.029	0.024	0.0293333	0.023	0.027	0.022	0.024	0.151	0.191	0.165	0.169	0.186	0.22	0.189	0.198333	0.039
104	31.8	28.1	30	29.9667	0.7	0.7	0.7	0.7	17.3628	15.3426	16.38	16.3618	0.319	0.259	0.3	0.292667	18.3726	16.8811	18.315	17.8562	0.044	0.058	0.061	0.0543333	0.04	0.033	0.047	0.04	0.279	0.23	0.265	0.258	0.004	0.025	0.014	0.0143333	0.04	0.029	0.035	0.0346667	0.275	0.201	0.239	0.238333	0.279	0.226	0.253	0.252667	0.004
105	27.1	25.2	26.6	26.3	0.7	0.5	0.6	0.6	14.7966	9.828	12.4488	12.3578	0.285	0.162	0.191	0.212667	19.2612	16.4835	15.3428	17.0292	0.066	0.03	0.04	0.0453333	0.039	0.028	0.026	0.031	0.249	0.142	0.167	0.186	0.027	0.002	0.014	0.0143333	0.036	0.02	0.024	0.0266667	0.219	0.132	0.151	0.167333	0.246	0.134	0.165	0.181667	0.03
114	29.1	30.1	29.1	29.4333	0.5	0.5	0.6	0.533333	11.349	11.739	13.6188	12.2356	0.248	0.241	0.26	0.249667	21.8521	20.5299	19.0913	20.4911	0.069	0.081	0.089	0.0796667	0.034	0.034	0.035	0.0343333	0.219	0.211	0.229	0.219667	0.035	0.047	0.054	0.0453333	0.029	0.03	0.031	0.03	0.179	0.16	0.171	0.17	0.214	0.207	0.225	0.215333	0.04
115	40.1	39.2	39.2	39.5	0.5	0.6	0.6	0.566667	15.639	18.3456	18.3456	17.4434	0.314	0.336	0.328	0.326	20.078	18.315	17.8789	18.7573	0.184	0.2	0.181	0.188333	0.149	0.165	0.142	0.152	0.277	0.302	0.292	0.290333	0.035	0.035	0.039	0.0363333	0.037	0.034	0.036	0.0356667	0.13	0.136	0.147	0.137667	0.165	0.171	0.186	0.174	0.147
124	24.8	31.4	27.4	27.8667	0.6	0.6	0.7	0.633333	11.6064	14.6952	14.9604	13.754	0.189	0.251	0.232	0.224	16.2841	17.0804	15.5076	16.2907	0.067	0.098	0.088	0.0843333	0.029	0.041	0.035	0.035	0.165	0.223	0.204	0.197333	0.038	0.057	0.053	0.0493333	0.024	0.028	0.028	0.0266667	0.122	0.153	0.144	0.139667	0.16	0.21	0.197	0.189	0.043
127	27.5	23.5	24.8	25.2667	0.7	0.5	0.5	0.566667	15.015	9.165	9.672	11.284	0.238	0.136	0.152	0.175333	15.8508	14.8391	15.7155	15.4684	0.12	0.067	0.073	0.0866667	0.056	0.031	0.036	0.041	0.206	0.12	0.133	0.153	0.064	0.036	0.037	0.0456667	0.032	0.016	0.019	0.0223333	0.118	0.069	0.079	0.0886667	0.182	0.105	0.116	0.134333	0.088
128	28.5	28.8	24	27.1	0.6	0.7	0.7	0.666667	13.338	15.7248	13.104	14.0556	0.169	0.219	0.173	0.187	12.6706	13.927	13.2021	13.2666	0.056	0.071	0.076	0.0676667	0.024	0.035	0.031	0.03	0.146	0.189	0.151	0.162	0.032	0.036	0.045	0.0376667	0.023	0.03	0.022	0.025	0.113	0.148	0.097	0.119333	0.145	0.184	0.142	0.157	0.033
143	33.2	29.3	32.7	31.7333	0.7	0.6	0.7	0.666667	18.1272	13.7124	17.8542	16.5646	0.375	0.282	0.375	0.344	20.6871	20.5653	21.0035	20.752	0.178	0.137	0.16	0.158333	0.069	0.056	0.058	0.061	0.338	0.254	0.336	0.309333	0.109	0.081	0.102	0.0973333	0.037	0.028	0.039	0.0346667	0.197	0.145	0.215	0.185667	0.306	0.226	0.317	0.283	0.141
144	30.5	30.8	30.6	30.6333	0.5	0.5	0.5	0.5	11.895	12.012	11.934	11.947	0.221	0.2	0.188	0.203	18.5792	16.65	15.7533	16.9942	0.033	0.034	0.045	0.0373333	0.027	0.024	0.023	0.0246667	0.196	0.176	0.167	0.179667	0.006	0.01	0.022	0.0126667	0.025	0.024	0.021	0.0233333	0.188	0.166	0.143	0.165667	0.194	0.176	0.165	0.178333	0.008
146	28.5	32.8	30.1	30.4667	0.6	0.6	0.6	0.6	13.338	15.3504	14.0868	14.2584	0.226	0.266	0.237	0.243	16.9441	17.3285	16.8243	17.0323	0.101	0.13	0.118	0.116333	0.058	0.07	0.064	0.064	0.201	0.236	0.211	0.216	0.043	0.06	0.054	0.0523333	0.025	0.03	0.026	0.027	0.125	0.136	0.119	0.126667	0.168	0.196	0.173	0.179	0.076
CS	33.1	34.2	30.2	32.5	0.5	0.5	0.6	0.533333	12.909	13.338	14.1336	13.4602	0.271	0.276	0.224	0.257	20.9931	20.6928	15.8488	19.1782	0.145	0.157	0.125	0.142333	0.125	0.112	0.097	0.111333	0.241	0.247	0.198	0.228667	0.02	0.045	0.028	0.031	0.03	0.029	0.026	0.0283333	0.126	0.119	0.099	0.114667	0.146	0.164	0.127	0.145667	0.115
SQ	20.2	22.2	23.1	21.8333	0.5	0.5	0.5	0.5	7.878	8.658	9.009	8.515	0.131	0.14	0.133	0.134667	16.6286	16.17	14.763	15.8539	0.049	0.049	0.046	0.048	0.017	0.021	0.019	0.019	0.113	0.119	0.114	0.115333	0.032	0.028	0.027	0.029	0.018	0.021	0.019	0.0193333	0.082	0.091	0.087	0.0866667	0.114	0.119	0.114	0.115667	0.031
[truncated: 71 more columns]

## Sheet: Correlation matrix 2008
		Mean08	Mean 0-3h 08	Mean 2008	Mean 2008	Mean08	Mean08	Mean08	Mean 0-6h 08	Mean 2008	Mean 2008	Mean08	Mean08	Mean08	Mean08	Mean08	Mean08	Mean08	Mean08	Mean08	Mean08	Mean08	Mean08	Mn spec water cont	Mean08	Mean08	Lamina thickness	Thickness at	Mean	Stomatal no
		%ELWL0-3h	3h loss/cm2/h	%ELWLFW 0-3h	%ELWLDW 0-3h	%ELWL 3-6h	3-6h loss/cm2/h	%ELWL 0-6h	loss/cm2/h	%ELWLFW 0-6h	%ELWLDW 0-6h	length	width	leaf area	FW after 0h	FW after 3h	FW after 6h	Initial leaf water	DW (after 48h)	0-3h water loss	0-6h water loss	3h water	SLA cm2/gFW	SWC mgIH20/cm2	SLA cm2/gDW	DW%FW 0h	SQ Mean	Mn midrib	Lamina+midrib	Mean of 6
Mean08	%ELWL0-3h	1
Mean 0-3h 08	3h loss/cm2/h	0.729064	1
Mean 2008	%ELWLFW 0-3h	0.986301	0.783145	1
Mean 2008	%ELWLDW 0-3h	0.610147	0.791862	0.710938	1
Mean08	%ELWL 3-6h	0.812676	0.594426	0.806536	0.461735	1
Mean08	3-6h loss/cm2/h	0.143824	0.463953	0.183649	0.248952	0.563361	1
Mean08	%ELWL 0-6h	0.90106	0.69454	0.894243	0.526988	0.963847	0.50651	1
Mean 0-6h 08	loss/cm2/h	0.638474	0.932908	0.698809	0.722625	0.699578	0.724625	0.745684	1
Mean 2008	%ELWLFW 0-6h	0.893545	0.738101	0.907485	0.626038	0.95559	0.534008	0.988343	0.796873	1
Mean 2008	%ELWLDW 0-6h	0.532593	0.766751	0.640278	0.962453	0.534917	0.474631	0.564883	0.788328	0.670003	1
Mean08	length	-0.339797	-0.369053	-0.314544	-0.0894148	-0.374197	-0.284025	-0.394676	-0.368068	-0.364082	-0.108177	1
Mean08	width	-0.253414	-0.431218	-0.265504	-0.217051	-0.204974	-0.269359	-0.265121	-0.428605	-0.277052	-0.227081	0.472507	1
Mean08	leaf area	-0.338316	-0.466595	-0.335485	-0.188001	-0.327044	-0.328464	-0.377922	-0.47127	-0.372579	-0.207365	0.809642	0.89543	1
Mean08	FW after 0h	-0.338889	-0.200647	-0.299029	0.0151334	-0.305404	-0.0825346	-0.344031	-0.182221	-0.306053	0.025519	0.769194	0.794024	0.911765	1
Mean08	FW after 3h	-0.727122	-0.541695	-0.708397	-0.36085	-0.614565	-0.165347	-0.691341	-0.490772	-0.673494	-0.32164	0.714124	0.71571	0.836809	0.87523	1
Mean08	FW after 6h	-0.794074	-0.632552	-0.787502	-0.450515	-0.808939	-0.425416	-0.863506	-0.665071	-0.856409	-0.477095	0.64911	0.610172	0.739635	0.728538	0.939211	1
Mean08	Initial leaf water	-0.334309	-0.164936	-0.284908	0.0720495	-0.30416	-0.0630969	-0.341228	-0.147275	-0.293363	0.0845541	0.762774	0.765988	0.889927	0.997114	0.86427	0.716228	1
Mean08	DW (after 48h)	-0.315378	-0.409328	-0.346282	-0.371232	-0.264764	-0.200405	-0.307708	-0.388705	-0.342517	-0.376808	0.689015	0.855677	0.912704	0.858928	0.80865	0.694617	0.817573	1
Mean08	0-3h water loss	0.23609	0.272275	0.28792	0.45815	0.164248	0.0435092	0.183886	0.245867	0.233263	0.430745	0.579819	0.624116	0.698822	0.817166	0.436398	0.235972	0.824858	0.634094	1
Mean08	0-6h water loss	0.130234	0.20141	0.181372	0.366147	0.188796	0.209307	0.176131	0.252264	0.224216	0.401126	0.587087	0.651879	0.718704	0.851534	0.514465	0.261227	0.856889	0.678704	0.970901	1
Mean08	3h water content	-0.786176	-0.543085	-0.756395	-0.337697	-0.664916	-0.147335	-0.74557	-0.48767	-0.715878	-0.289785	0.679458	0.640622	0.770457	0.829208	0.989617	0.94531	0.826301	0.715699	0.363165	0.444946	1
Mean08	SLA cm2/gFW	-0.0538856	-0.648532	-0.135449	-0.435468	-0.109419	-0.604434	-0.13431	-0.721534	-0.20972	-0.508682	0.216115	0.38559	0.365807	-0.0328911	0.0535914	0.146785	-0.074981	0.256313	-0.125043	-0.158697	0.00100117	1
Mn spec water cont	SWC mgIH20/cm2	0.0401973	0.6842	0.136462	0.538821	0.0664982	0.571949	0.101135	0.734877	0.189562	0.600785	-0.157309	-0.377371	-0.328586	0.0736556	-0.0336216	-0.119994	0.123664	-0.275511	0.177073	0.195635	0.027397	-0.95764	1
Mean08	SLA cm2/gDW	-0.104314	-0.158583	-0.0214929	0.436458	-0.194082	-0.315302	-0.210161	-0.235316	-0.122572	0.400196	0.367773	0.24391	0.347467	0.281283	0.201084	0.218891	0.323689	-0.0499341	0.283601	0.228832	0.250923	0.274045	-0.141482	1
Mean08	DW%FW 0h	0.0751756	-0.366504	-0.0651437	-0.602801	0.0907351	-0.244427	0.0865022	-0.370804	-0.0513502	-0.648121	-0.0955748	0.163162	0.0689334	-0.185019	-0.0905614	-0.0370344	-0.251599	0.29381	-0.236241	-0.232374	-0.179296	0.585495	-0.651884	-0.509778	1
Lamina thickness	SQ Mean	-0.106195	0.0243056	-0.0776213	-0.0588609	-0.0370735	0.126531	-0.0454525	0.0621171	-0.043311	-0.0315804	0.0898535	0.356982	0.268874	0.352698	0.29909	0.210903	0.342272	0.366407	0.299654	0.335581	0.265555	-0.173694	0.126012	-0.161339	-0.0426618	1
Thickness at	Mn midrib	-0.154691	-0.114098	-0.134516	-0.0945977	-0.115969	0.0548105	-0.115467	-0.0791034	-0.105198	-0.056618	0.231449	0.236668	0.265577	0.287505	0.29999	0.244565	0.282952	0.272062	0.177315	0.21795	0.289674	-0.0290074	0.00107859	0.036809	-0.129645	0.42261	1
Mean	Lamina+midrib	-0.160443	-0.0967353	-0.136418	-0.0968351	-0.111326	0.0755634	-0.112642	-0.0575371	-0.103024	-0.057189	0.225522	0.286413	0.293673	0.330892	0.330753	0.262712	0.324633	0.319993	0.221363	0.265199	0.314485	-0.0624578	0.0274893	-0.00110468	-0.124711	0.587758	0.981632	1
Stomatal no	Mean of 6	-0.0276258	0.00396283	-0.0443095	-0.10249	0.0594228	0.12302	0.0524783	0.0273148	0.0224637	-0.0748944	-0.297929	0.133189	-0.0529892	-0.0563456	-0.0218712	-0.039969	-0.0673487	0.0269229	-0.0787471	-0.0488075	-0.0325429	0.0117367	-0.0214054	-0.157181	0.178598	0.28284	-0.201942	-0.120727	1
		P<0.05	P<0.01	P<0.001	P<0.0001
	92df	0.203	0.264	0.334	0.384
		-0.203	-0.264	-0.334	-0.384

## Sheet: All mn data 2008
	Mean08	Mean08	Mean08	Mean08	Mean 0-3h 08	Mean 2008	Mean 2008	Mean08	Mean08	Mean 2008	Mean 2008	Mean08	Mean 0-6h 08	Mean 2008	Mean 2008	Mean08	Mean08	Mean08	Mean08	Mean08	Mean08	Mean 2008	Mean08	Mean08	Mean08	Mn spec water cont	Mean08	Mean08	Lamina thickness	Thickness at	Mean	Stomatal no
CSDH	length	width	leaf area	%ELWL0-3h	3h loss/cm2/h	%ELWLFW 0-3h	%ELWLDW 0-3h	%ELWL 3-6h	3-6h loss/cm2/h	ELWLFW 3-6h	ELWLD 3-6h	%ELWL 0-6h	loss/cm2/h	%ELWLFW 0-6h	%ELWLDW 0-6h	FW after 0h	FW after 3h	FW after 6h	Initial leaf water	DW (after 48h)	0-3h water loss	3-6h water loss	0-6h water loss	3h water	SLA cm2/gFW	SWC mgIH20/cm2	SLA cm2/gDW	DW%FW 0h	SQ Mean	Mn midrib	Lamina+midrib	Mean of 6
1	27.8	0.633333	13.6968	57.711	3.52969	49.9286	372.014	40.3329	1.01931	14.405	107.857	74.3483	4.54901	64.3336	479.871	0.279667	0.140667	0.100667	0.241667	0.038	0.139	0.04	0.179	0.102667	47.1463	18.3534	349.625	13.5454	2.35	5.91	4.13	20.8333
2	32.2333	0.666667	16.7544	59.2827	3.55171	51.5419	394.856	51.383	1.23415	17.9789	137.861	79.9588	4.78586	69.5208	532.717	0.331667	0.160667	0.101	0.288333	0.0433333	0.171	0.0596667	0.230667	0.117333	48.5611	17.9914	372.075	13.0666	2.37	6.64333	4.50667	17
3	25.2667	0.533333	10.5404	78.4565	5.48299	69.3233	595.833	94.4499	1.42707	18.0512	155.317	98.8832	6.91006	87.3746	751.15	0.24	0.0736667	0.0303333	0.212	0.028	0.166333	0.0433333	0.209667	0.0456667	42.1587	20.9649	362.303	11.6384	2.25833	5.41	3.83417	20.1667
4	27.1	0.666667	14.0868	66.0547	3.81662	54.9283	404.265	36.7783	0.777393	11.5416	84.3791	76.9805	4.43292	66.4699	488.644	0.270667	0.123333	0.0913333	0.233333	0.0373333	0.147333	0.032	0.179333	0.086	50.1251	17.2368	367.647	13.6809	1.89	5.85333	3.87167	18.6667
5	27.3	0.7	14.9058	69.0039	4.39731	59.8787	453.15	74.3619	1.41223	19.1494	145.516	91.0581	5.80954	79.0281	598.665	0.316333	0.127333	0.0666667	0.274667	0.0416667	0.189	0.0606667	0.249667	0.0856667	45.2997	19.1778	343.561	13.1897	2.22667	6.97	4.59833	22
7	29.7333	0.8	18.8058	57.1823	3.33839	47.7183	304.424	45.8684	1.09398	15.5361	96.7877	75.9021	4.43236	63.2544	401.212	0.374667	0.196333	0.139667	0.316333	0.0583333	0.178333	0.0566667	0.235	0.138	47.8408	17.496	308.858	16.3143	2.24833	6.04333	4.14583	21.6667
8	28.8667	0.766667	17.2796	68.7043	3.8508	59.5297	469.083	74.406	1.1043	17.2281	138.36	88.537	4.95511	76.7578	607.443	0.314	0.128	0.074	0.273667	0.0403333	0.186	0.054	0.24	0.0876667	52.7504	16.6203	435.964	12.9154	2.16167	5.87333	4.0175	28.8333
9	24.4	0.666667	12.714	58.297	3.63182	50.4986	378.959	40.4734	1.04921	14.5826	108.707	75.1494	4.68103	65.0812	487.666	0.263667	0.130333	0.0916667	0.228333	0.0353333	0.133333	0.0386667	0.172	0.095	46.344	18.6921	347.707	13.3757	2.24667	5.22333	3.735	28
10	31.4667	0.8	19.6352	67.8884	4.40971	59.3332	471.143	84.6439	1.73616	23.3264	185.656	94.5695	6.14588	82.6596	656.799	0.421333	0.171333	0.073	0.368333	0.053	0.25	0.0983333	0.348333	0.118333	44.8137	19.5133	356.326	12.5795	2.35667	5.76	4.05833	24
11	28.4667	0.766667	17.0222	56.0044	3.79167	48.7554	377.656	38.8976	1.13427	14.5177	111.587	72.699	4.92594	63.2731	489.242	0.379667	0.194667	0.139667	0.330667	0.049	0.185	0.055	0.24	0.145667	43.0814	20.2796	334.567	12.9093	2.28833	6.54667	4.4175	22.6667
12	29.5667	0.666667	15.3504	66.3289	3.8148	57.0204	407.828	58.8483	1.07581	15.9606	114.327	84.8897	4.89061	72.981	522.155	0.298333	0.129	0.081	0.256333	0.042	0.169333	0.048	0.217333	0.087	49.6976	17.3508	354.182	14.0987	2.335	6.915	4.625	18.75
13	27.5667	0.7	15.0514	73.2871	4.88255	63.551	479.525	76.9745	1.35313	17.5767	133.081	93.5456	6.23568	81.1276	612.605	0.331667	0.120667	0.0623333	0.287667	0.044	0.211	0.0583333	0.269333	0.0766667	43.7258	19.9632	328.952	13.2783	2.3325	5.855	4.09375	25.25
14	28.3333	0.733333	16.2006	51.3834	3.31801	44.8805	355.13	46.0066	1.40479	19.0617	150.362	73.2166	4.7228	63.9422	505.492	0.343	0.19	0.124667	0.299333	0.0436667	0.153	0.0653333	0.218333	0.146333	45.3227	19.2868	356.705	12.7059	2.24	6.36	4.3	26.8333
15	24.5	0.6	11.466	61.8253	3.71057	53.5491	402.48	68.5276	1.54241	22.2146	166.639	87.4813	5.25297	75.7637	569.119	0.229667	0.107	0.056	0.199	0.0306667	0.122667	0.051	0.173667	0.0763333	48.1226	18.062	360.428	13.3821	2.11833	6.39333	4.25583	21.6667
16	27.9	0.733333	15.9666	70.9035	4.2332	61.6341	471.469	79.9382	1.38495	20.2062	154.633	94.1472	5.61814	81.8404	626.102	0.316333	0.121667	0.0576667	0.275	0.0413333	0.194667	0.064	0.258667	0.0803333	48.617	17.9067	371.955	13.0713	2.19833	5.35667	3.7775	31
17	23.6667	0.566667	10.504	75.224	4.5302	63.3715	459.885	83.5737	1.34818	18.2867	131.53	95.5532	6.02112	81.6582	591.414	0.223667	0.0816667	0.041	0.192333	0.0313333	0.142	0.0406667	0.182667	0.0503333	45.2715	18.9401	325.947	14.4378	1.94	6.19	4.065	19.5
18	27.6333	0.833333	17.8958	66.4344	4.19559	57.5378	429.874	73.8562	1.52824	20.8313	155.933	90.4796	5.72382	78.3692	585.807	0.375333	0.160333	0.0826667	0.325	0.0503333	0.215	0.0776667	0.292667	0.11	45.8375	18.9746	341.914	13.3982	2.365	6.04	4.2025	33.5
19	25.7667	0.633333	12.6802	70.832	4.71394	63.3458	601.683	75.333	1.40652	18.7043	179.146	91.7262	6.12046	82.0502	780.829	0.273667	0.101333	0.05	0.245	0.0286667	0.172333	0.0513333	0.223667	0.0726667	44.7466	20.1193	425.326	10.5114	2.17667	6.42333	4.3	27.6667
20	29.5333	1.03333	23.777	64.4288	3.52867	55.4654	401.105	64.1274	1.23463	19.5369	140.547	87.1429	4.7633	75.0023	541.652	0.437667	0.195	0.110333	0.377333	0.0603333	0.242667	0.0846667	0.327333	0.134667	52.7368	16.4555	379.384	13.8925	2.365	6.43333	4.39917	26.3333
21	26.2333	0.833333	17.017	83.5582	5.10923	73.0213	579.661	87.3686	0.876511	12.5374	99.5685	97.9038	5.98574	85.5587	679.229	0.343333	0.0926667	0.0496667	0.3	0.0433333	0.250667	0.043	0.293667	0.0493333	47.7171	18.3473	379.193	12.6123	2.21333	5.57	3.89167	21.3333
22	26.9667	0.666667	14.0218	61.6547	4.27106	54.2271	450.78	65.862	1.74794	22.1398	183.96	86.8288	6.019	76.3669	634.74	0.319	0.146	0.0753333	0.280667	0.0383333	0.173	0.0706667	0.243667	0.107667	42.3269	20.814	351.61	12.0513	2.28667	7.12667	4.70667	24
23	26.6333	0.766667	15.8886	64.4915	3.3542	55.3345	389.763	64.757	1.21604	19.7753	139.374	87.537	4.57024	75.1098	529.137	0.274667	0.122333	0.0683333	0.235667	0.039	0.152333	0.054	0.206333	0.0833333	55.3396	15.6727	389.895	14.1981	2.20833	5.77333	3.99083	28
24	28.1	0.766667	16.8454	57.4952	3.50594	49.9745	382.176	50.0543	1.29494	18.4726	141.361	78.7456	4.80087	68.4471	523.537	0.339333	0.17	0.107333	0.295	0.0443333	0.169333	0.0626667	0.232	0.125667	47.6197	18.2777	364.476	13.0748	2.24667	5.83	4.03833	25.8333
25	35	0.866667	23.855	57.7705	3.89262	52.7153	690.139	46.0643	1.20811	16.0692	190.548	75.5289	5.10073	68.7845	880.688	0.510667	0.237	0.155333	0.464667	0.046	0.273667	0.0816667	0.355333	0.191	44.6134	20.3661	548.972	11.2666	2.13167	5.91333	4.0225	26.3333
26	37.2	0.8	23.3454	56.8996	2.62677	47.6119	304.325	42.7041	0.779965	14.2985	90.4755	74.0199	3.40674	61.9104	394.8	0.366	0.194	0.142667	0.308667	0.0573333	0.172	0.0513333	0.223333	0.136667	62.4623	14.1853	389.459	15.9791	2.08167	6.10667	4.09417	20.8333
27	29.4667	0.833333	19.1594	62.8636	3.71452	53.7298	370.958	70.7413	1.51263	22.0099	151.779	88.6217	5.22715	75.7397	522.737	0.379667	0.175333	0.092	0.324667	0.055	0.204333	0.0833333	0.287667	0.120333	48.5292	17.6522	335.763	14.514	2.31333	5.75333	4.03333	30
28	30.4	0.733333	17.446	52.5179	3.33304	45.7758	357.39	38.5195	1.16098	15.9597	124.968	70.8203	4.49402	61.7355	482.358	0.365	0.197667	0.139667	0.318	0.047	0.167333	0.058	0.225333	0.150667	45.8727	19.0341	358.111	12.8241	2.16	6.24	4.2	22
29	25.9667	0.633333	12.857	62.8238	3.59814	54.9778	441.22	71.4013	1.47301	22.3383	178.091	88.3749	5.07114	77.3161	619.312	0.243	0.108333	0.0543333	0.212667	0.0303333	0.134667	0.054	0.188667	0.078	50.7378	17.2797	406.815	12.5005	2.04333	6.255	4.14917	26.5
30	30.5333	0.9	21.4864	48.7029	3.3915	42.8769	373.016	34.8188	1.20735	15.3217	132.593	66.1191	4.59885	58.1986	505.608	0.488333	0.278	0.203	0.431333	0.057	0.210333	0.075	0.285333	0.221	42.6132	21.1886	364.762	11.8061	2.02667	5.58333	3.805	24
31	32.5333	0.8	20.3008	44.6414	2.81269	38.979	313.455	28.9324	0.976017	13.7497	107.24	60.4587	3.78871	52.7288	420.695	0.416	0.251	0.193667	0.362667	0.0533333	0.165	0.0573333	0.222333	0.197667	47.3741	18.5636	367.786	12.9678	2.33167	6.68333	4.5075	24.3333
32	27.3	0.666667	14.235	68.6606	6.37481	62.7678	815.196	67.2852	1.76837	19.3195	218.321	90.0198	8.14318	82.0873	1033.52	0.409333	0.139333	0.068	0.376667	0.0326667	0.27	0.0713333	0.341333	0.106667	36.4369	26.9549	418.373	10.5319	2.195	4.855	3.525	27
33	29.5333	0.733333	16.731	57.1787	3.73912	49.8867	392.419	54.1836	1.51417	19.94	158.1	80.0055	5.25329	69.8266	550.519	0.358	0.180333	0.108667	0.312333	0.0456667	0.177667	0.0716667	0.249333	0.134667	45.0147	19.5563	351.662	12.7734	2.285	5.79333	4.03917	21.3333
34	23.4333	0.6	10.9668	63.9674	4.21998	55.235	404.673	67.7308	1.58734	20.8189	152.649	88.0746	5.80732	76.054	557.321	0.241667	0.108	0.0576667	0.208667	0.033	0.133667	0.0503333	0.184	0.075	43.6608	19.7924	319.929	13.6529	2.26833	5.36667	3.8175	35.5
35	27	0.633333	13.3172	62.8173	3.78312	54.1563	392.793	54.2191	1.20933	17.2763	125.225	82.8586	4.99245	71.4325	518.018	0.268333	0.123	0.0766667	0.231333	0.037	0.145333	0.0463333	0.191667	0.086	47.7196	18.1216	346.081	13.789	2.12	6.02667	4.07333	30.1667
36	25.7333	0.566667	11.44	67.0309	4.96693	58.6472	470.188	72.8911	1.76884	20.6607	166.763	90.6215	6.73577	79.3079	636.95	0.276667	0.113	0.0563333	0.242	0.0346667	0.163667	0.0566667	0.220333	0.0783333	39.388	22.3781	315.663	12.4588	2.445	5.34667	3.89583	32.1667
37	25.6	0.566667	11.3204	69.2434	4.38028	60.2248	462.588	75.6386	1.4357	19.8206	152.103	92.0352	5.81598	80.0454	614.691	0.232333	0.093	0.047	0.202	0.0303333	0.139333	0.046	0.185333	0.0626667	46.5485	18.8644	356.479	13.0392	2.025	4.82667	3.42583	31.6667
38	18.7667	0.566667	8.2992	72.5756	4.05309	58.518	379.612	85.4394	1.45335	22.0415	144.085	95.2508	5.31282	80.5595	523.697	0.157667	0.0656667	0.031	0.133333	0.0243333	0.092	0.0346667	0.126667	0.0413333	50.5693	16.728	328.692	15.4188	1.95333	4.64667	3.3	27.6667
39	28.9333	0.7	15.7976	61.7515	4.03038	53.6822	410.96	66.4749	1.63103	21.7187	166.38	86.7324	5.66141	75.401	577.34	0.342333	0.158667	0.0843333	0.297667	0.0446667	0.183667	0.0743333	0.258	0.114	44.3747	19.5964	340.11	13.0495	2.36833	5.85333	4.11083	33.5
40	21.8667	0.7	11.9678	73.1717	4.51708	63.259	471.059	77.1956	1.28733	17.9178	134.062	93.8799	5.80441	81.1768	605.12	0.247	0.0913333	0.047	0.213333	0.0336667	0.155667	0.0443333	0.2	0.0576667	46.8502	18.547	347.632	13.5423	2.31333	6.03	4.17167	32
41	20.2667	0.566667	8.9596	62.3244	5.95356	55.2819	489.698	51.829	1.8173	16.7914	148.571	86.2167	6.61779	72.0734	638.27	0.278667	0.127667	0.0816667	0.247	0.0316667	0.151	0.046	0.197	0.096	38.6969	23.0459	346.596	11.3208	2.31333	6.45	4.38167	30.5
42	23.4667	0.8	14.6302	55.8373	3.78433	48.3189	359.491	74.8863	2.23417	28.4293	211.991	88.6783	6.0185	76.7482	571.481	0.328667	0.169667	0.0763333	0.284333	0.0443333	0.159	0.0933333	0.252333	0.125333	42.7307	20.311	316.83	13.4816	2.14667	5.99	4.06833	31.1667
43	27.6	0.7	15.0696	41.9482	2.51564	36.7948	300.8	34.3377	1.18862	17.398	142.555	61.7763	3.70426	54.1928	443.355	0.297333	0.188	0.136333	0.261	0.0363333	0.109333	0.0516667	0.161	0.151667	48.7488	18.0118	400.138	12.2261	2.20333	5.82667	4.015	26.8333
44	26.1	0.633333	12.9246	58.5118	3.65659	51.5842	438.03	58.3702	1.39541	19.4128	167.159	80.4897	5.052	70.9969	605.189	0.266	0.132	0.0806667	0.235	0.031	0.134	0.0513333	0.185333	0.101	46.9064	18.9143	400.293	11.7189	2.08833	5.70333	3.89583	26.3333
45	30.5667	0.6	14.3052	51.8204	3.43278	46.1449	422.623	40.8548	1.30082	17.5321	160.689	71.5071	4.7336	63.677	583.312	0.307	0.165333	0.111667	0.273333	0.0336667	0.141667	0.0536667	0.195333	0.131667	44.9112	19.8714	411.812	10.9545	2.0325	5.72	3.87625	15.25
46	28.3	0.833333	18.434	53.4853	3.25222	46.9262	383.26	41.8243	1.16607	16.7853	137.432	72.6103	4.41829	63.7115	520.692	0.368	0.196333	0.135	0.323	0.045	0.171667	0.0613333	0.233	0.151333	48.128	18.2563	393.436	12.2371	2.355	5.36	3.8575	28.8333
47	23.8667	0.833333	15.548	57.1748	3.66837	50.0902	404.529	57.2658	1.57522	21.4883	173.737	81.6984	5.24359	71.5784	578.266	0.327333	0.163333	0.0933333	0.286667	0.0406667	0.164	0.07	0.234	0.122667	45.5697	19.2466	367.826	12.3897	2.425	6.105	4.265	24
48	27.3	0.633333	13.4888	50.1082	3.33581	43.9524	359.281	43.818	1.42738	18.8202	153.281	71.5753	4.76318	62.7726	512.562	0.295	0.164333	0.108667	0.258667	0.0363333	0.130667	0.0556667	0.186333	0.128	43.999	19.9222	356.753	12.3707	2.105	5.83	3.9675	24
49	23.2667	0.6	10.8888	45.3764	3.08236	39.8057	325.538	41.087	1.48672	19.2332	156.183	67.323	4.56909	59.0389	481.72	0.242667	0.146	0.0993333	0.212667	0.03	0.0966667	0.0466667	0.143333	0.116	43.2072	20.3254	349.718	12.3763	2.02167	4.86333	3.4425	25.3333
50	24.0333	0.6	11.323	68.7375	4.57256	59.7043	454.796	75.8626	1.5458	20.5836	156.13	92.4511	6.11836	80.288	610.926	0.24	0.0973333	0.0473333	0.208333	0.0316667	0.142667	0.05	0.192667	0.0656667	44.6485	19.8815	338.229	13.1522	2.08	6.61	4.345	24.3333
51	25.9667	0.766667	15.5662	63.4268	3.52236	54.4758	395	73.5988	1.48494	22.9853	167.287	90.1707	5.00729	77.461	562.287	0.289	0.131333	0.0646667	0.248667	0.0403333	0.157667	0.0666667	0.224333	0.091	51.6938	16.6427	376.442	14.0799	2.02	5.895	3.9575	20.5
52	28.5667	0.933333	20.8858	63.3894	3.44945	53.9561	362.724	57.2987	1.11497	17.4242	117.266	83.8558	4.56441	71.3803	479.991	0.385	0.175	0.108	0.327667	0.0573333	0.21	0.067	0.277	0.117667	52.1063	16.3409	350.689	14.8624	2.40333	6.76	4.58167	34
53	31.3667	1	24.466	44.1593	2.38002	37.7116	258.43	27.489	0.818445	13.0025	89.0646	59.386	3.19847	50.714	347.495	0.444333	0.276333	0.218667	0.379333	0.065	0.168	0.0576667	0.225667	0.211333	53.0255	16.1189	362.5	14.6294	2.28333	5.94667	4.115	30.1667
54	30.4333	0.9	21.3356	49.1014	2.78842	42.3399	307.498	35.2906	1.02082	15.4819	112.494	67.0543	3.80924	57.8218	419.992	0.406333	0.234333	0.171667	0.350333	0.056	0.172	0.0626667	0.234667	0.178333	50.6513	17.0602	367.953	13.769	2.50167	6.87333	4.6875	28.6667
55	31.2	0.833333	20.3424	62.881	3.99904	55.2261	454.105	75.5808	1.7762	24.5475	202.222	90.8236	5.77524	79.7736	656.327	0.421667	0.19	0.0863333	0.370333	0.0513333	0.231667	0.103667	0.335333	0.138667	46.1867	19.0507	379.54	12.1722	2.24333	6.03	4.13667	21.8333
56	28.1	0.766667	16.8558	52.6152	3.49175	46.4875	399.889	51.1504	1.58215	21.0505	181.119	76.4403	5.0739	67.538	581.008	0.364	0.196	0.12	0.321333	0.0426667	0.168	0.076	0.244	0.153333	44.4523	19.8771	381.038	11.6766	2.28667	6.35333	4.32	31.8333
57	27.2667	0.833333	17.7554	62.0492	3.55232	53.5262	389.783	67.5129	1.40942	21.2457	154.519	86.6827	4.96174	74.7719	544.303	0.339	0.158333	0.0863333	0.292333	0.0466667	0.180667	0.072	0.252667	0.111667	50.2844	17.1742	365.574	13.7565	2.285	5.81	4.0475	27.6667
58	29.3667	0.666667	15.2308	63.2233	4.34784	54.6474	405.282	75.4661	1.91748	23.9932	177.653	90.9881	6.26532	78.6406	582.935	0.343667	0.156	0.0733333	0.297	0.0466667	0.187667	0.0826667	0.270333	0.109333	42.9294	20.6456	315.999	13.5689	2.29167	6.13333	4.2125	22
59	28.5667	0.666667	14.9552	55.3575	3.89296	48.8676	420.665	52.8245	1.6299	20.4702	175.96	78.5511	5.52286	69.3378	596.625	0.34	0.175667	0.106667	0.299333	0.0406667	0.164333	0.069	0.233333	0.135	42.0308	21.0343	358.048	11.7948	2.29667	6.74333	4.52	21.3333
60	27.7333	0.666667	14.4482	56.9918	3.39791	49.6378	384.933	43.3491	1.11544	16.234	125.439	75.641	4.51335	65.8718	510.372	0.284667	0.143333	0.0976667	0.248	0.0366667	0.141333	0.0456667	0.187	0.106667	48.7186	17.886	377.991	12.9032	2.32	6.28	4.3	26.5
61	26.7333	0.733333	15.3036	56.5447	3.89371	49.8825	426.175	44.7139	1.31146	16.7507	142.885	75.5362	5.20517	66.6332	569.06	0.341	0.172	0.115333	0.301333	0.0396667	0.169	0.0566667	0.225667	0.132333	43.189	20.7366	371.208	11.7104	2.225	6.73333	4.47917	22.1667
62	28.6	0.733333	16.4008	60.5706	3.68759	52.968	424.242	50.108	1.21494	17.2917	139.596	80.3228	4.90253	70.2597	563.838	0.325	0.153	0.0973333	0.284	0.041	0.172	0.0556667	0.227667	0.112	48.2583	18.2632	384.141	12.5527	2.13667	5.77	3.95333	28.3333
63	31.1667	0.966667	23.725	63.1549	3.72304	53.9196	369.011	57.0509	1.21634	17.5908	120.555	83.7538	4.93938	71.5103	489.566	0.468667	0.213667	0.131	0.4	0.0686667	0.255	0.0826667	0.337667	0.145	48.2683	17.7708	330.382	14.5979	2.265	6.19	4.2275	29
64	27.1333	0.666667	14.1388	53.7524	3.02665	46.7868	364.863	35.4118	0.897993	13.8825	108.273	69.7023	3.92464	60.6693	473.136	0.264	0.141667	0.105667	0.23	0.034	0.122333	0.036	0.158333	0.107667	51.5062	16.9177	403.268	12.8778	2.00167	5.07667	3.53917	26.6667
65	31.2	0.733333	17.8646	61.8826	3.78799	54.8359	481.682	52.7023	1.22532	17.7556	156.006	81.9193	5.01331	72.5915	637.688	0.354667	0.160333	0.0973333	0.314333	0.0403333	0.194333	0.063	0.257333	0.12	48.4623	18.3392	425.711	11.3851	1.945	5.07333	3.50917	19.1667
66	24.7	0.633333	12.2408	64.3818	3.93085	59.7534	473.339	80.3975	1.5509	21.7299	172.2	93.2899	5.8473	81.4833	645.539	0.251333	0.101667	0.0473333	0.219333	0.032	0.149667	0.0543333	0.204	0.0696667	46.7011	18.7511	368.415	12.6832	2.28333	5.84333	4.06333	23.3333
67	31.6667	0.766667	18.967	57.9378	3.53231	49.2574	332.024	66.7159	1.6939	23.6184	158.506	85.7411	5.22621	72.8759	490.53	0.393333	0.199667	0.106667	0.333667	0.0596667	0.193667	0.093	0.286667	0.14	46.5251	18.2716	312.785	15.027	2.13	5.12	3.625	25.1667
69	29.0333	0.766667	17.3524	57.0096	3.53011	49.6437	387.975	57.1229	1.50712	21.2365	164.98	81.4176	5.03723	70.8802	552.955	0.356333	0.179333	0.104	0.310667	0.0456667	0.177	0.0753333	0.252333	0.133667	46.9368	18.6142	365.52	12.9038	2.155	5.53	3.8425	26.3333
70	24.1667	0.7	13.195	61.1345	3.52144	50.6081	294.076	78.3562	1.74789	25.1321	146.167	91.4885	5.26933	75.7402	440.243	0.265	0.130667	0.064	0.219333	0.0456667	0.134333	0.0666667	0.201	0.085	47.9274	17.2763	278.609	17.2152	2.28333	5.01	3.64667	31.3333
71	33.7667	1	26.3016	45.7956	2.69151	39.881	308.973	40.197	1.26323	18.6576	144.312	67.2256	3.95473	58.5387	453.285	0.514667	0.309667	0.214	0.448	0.0666667	0.205	0.0956667	0.300667	0.243	49.1859	17.7559	380.429	12.9533	2.29167	6.99333	4.6425	24.8333
72	27.7333	0.533333	11.7104	58.4724	4.3535	51.3621	422.65	51.2166	1.56806	18.4554	152.081	79.4785	5.92156	69.8175	574.731	0.284667	0.136667	0.0846667	0.25	0.0346667	0.148	0.052	0.2	0.102	39.3355	22.3553	324.191	12.1392	2.18833	5.75667	3.9725	33.5
80	26.9333	0.5	10.504	66.9948	4.01169	57.6663	419.652	93.4809	1.8261	26.2865	189.413	97.5826	5.83779	83.9528	609.065	0.210667	0.089	0.0336667	0.181333	0.0293333	0.121667	0.0553333	0.177	0.0596667	47.9919	17.9432	346.292	13.9815	1.995	5.58	3.7875	22.8333
86	27.4667	0.6	12.8544	60.7983	4.01672	53.0644	417.991	69.3407	1.78853	23.6315	186.486	87.867	5.80525	76.6958	604.477	0.280667	0.131667	0.0653333	0.245	0.0356667	0.149	0.0663333	0.215333	0.096	44.0314	19.8316	347.224	12.7021	2.2	6.82333	4.51167	23
87	23.4667	0.533333	9.7942	68.3853	3.97561	58.9331	426.533	65.3305	1.1732	17.7947	129.201	89.0236	5.14881	76.7278	555.733	0.188	0.076	0.0433333	0.162	0.026	0.112	0.0326667	0.144667	0.05	50.4728	17.3273	365.556	13.8067	2.09333	5.45333	3.77333	25.1667
88	27.1667	0.6	12.714	62.6633	4.15728	53.3433	359.298	61.6583	1.51996	19.5891	131.643	85.6843	5.67723	72.9324	490.941	0.285333	0.133	0.0773333	0.243	0.0423333	0.152333	0.0556667	0.208	0.0906667	43.0441	19.9034	288.979	14.873	2.07	5.43	3.75	24
90	26.4333	0.8	16.6088	66.2183	4.04536	57.6849	448.697	64.8304	1.26603	18.1185	140.491	87.0265	5.31139	75.8034	589.189	0.329667	0.143	0.084	0.286667	0.043	0.186667	0.059	0.245667	0.1	47.9665	18.2127	370.413	12.9431	2.25333	5.55	3.90167	25.8333
91	26.5	0.766667	15.8392	56.2757	3.80004	48.6018	356.719	47.0049	1.38164	17.7127	129.734	76.792	5.18168	66.3145	486.453	0.357	0.183667	0.120667	0.308333	0.0486667	0.173333	0.063	0.236333	0.135	42.6823	20.2555	312.944	13.6377	2.36833	6.39	4.37917	28.3333
92	26.0333	0.533333	10.8602	61.544	4.08369	54.0002	441.068	56.422	1.42951	18.8954	154.368	83.0783	5.51321	72.8956	595.436	0.237	0.109667	0.065	0.208	0.029	0.127333	0.0446667	0.172	0.0806667	44.1424	19.9379	360.207	12.247	2.10833	6.49333	4.30083	24
93	24.6333	0.5	9.607	63.8426	5.20436	55.8533	451.755	44.4511	1.23081	14.0962	112.606	79.9789	6.43518	69.9495	564.361	0.253	0.108	0.0736667	0.221667	0.0313333	0.145	0.0343333	0.179333	0.0766667	37.8848	23.9135	299.825	12.613	1.99667	4.79	3.39333	24.3333
94	31.9333	0.566667	14.1648	63.6867	4.4088	56.0709	468.997	54.2243	1.33326	16.98	142.011	82.9733	5.73349	73.0509	611.008	0.321	0.140333	0.0863333	0.282667	0.0383333	0.180667	0.054	0.234667	0.102	42.4347	20.7611	355.094	11.949	2.00333	5.83	3.91667	23.6667
96	27.4	0.6	12.8232	59.1037	4.00314	52.0221	434.709	44.6563	1.22686	16.0171	133.456	77.3084	5.23001	68.0391	568.164	0.284333	0.136667	0.0913333	0.250333	0.034	0.147667	0.0453333	0.193	0.102667	43.4349	20.3179	362.46	11.9781	2.23333	6.1	4.16667	20.6667
97	27.2333	0.7	14.8694	63.3214	3.66279	55.1768	436.885	52.8655	1.11031	16.8138	132.046	82.6437	4.7731	71.9906	568.931	0.284333	0.126333	0.0786667	0.248	0.0363333	0.158	0.0476667	0.205667	0.09	50.5583	17.2896	394.709	12.9373	2.19167	6.59333	4.3925	25.3333
98	42.3667	0.733333	24.2918	57.0582	3.50991	50.2887	426.91	43.9504	1.1517	16.6243	140.373	75.9343	4.66161	66.913	567.283	0.487	0.241	0.160667	0.429333	0.0576667	0.246	0.0803333	0.326333	0.183333	48.3579	18.3868	406.217	11.8961	2.15333	6.29	4.22167	21.1667
99	31	0.833333	20.1838	50.2042	2.71288	43.5298	327.579	37.337	0.991206	15.9349	119.867	68.5836	3.70409	59.4647	447.446	0.361	0.203667	0.146	0.313	0.048	0.157333	0.0576667	0.215	0.155667	53.6447	16.2452	403.306	13.2884	1.97833	5.66667	3.8225	24.3333
102	26.8667	0.8	16.7648	70.2595	4.74144	62.7908	592.838	80.0559	1.57397	20.6125	194.382	93.327	6.31541	83.4032	787.22	0.365333	0.135333	0.06	0.326333	0.039	0.23	0.0753333	0.305333	0.0963333	44.0895	20.3758	416.644	10.6237	2.15	6.02333	4.08667	25
104	28.7	0.666667	14.9162	56.9945	4.65258	50.4331	439.64	71.41	2.48806	26.999	235.411	87.5054	7.14064	77.432	675.051	0.395333	0.196333	0.0896667	0.349667	0.0456667	0.199	0.106667	0.305667	0.150667	36.2265	24.4497	314.721	11.5398	2.23	6.625	4.4275	24
105	27.1	0.7	14.7966	66.1195	4.05635	57.3738	438.989	89.5851	1.84996	26.2263	198.803	96.3906	5.90631	83.6001	637.792	0.301333	0.128333	0.0493333	0.261333	0.04	0.173	0.079	0.252	0.0883333	47.2236	18.3756	358.563	13.2896	2.125	5.60333	3.86417	25.8333
114	27.2333	0.666667	14.1492	62.7028	4.37503	55.2578	465.612	86.3514	2.24991	28.2836	238.497	94.7942	6.62494	83.5415	704.109	0.322667	0.144667	0.0533333	0.284333	0.0383333	0.178	0.0913333	0.269333	0.106333	42.2879	21.0137	356.747	11.8753	2.2575	6.825	4.54125	21.75
115	37.0333	0.733333	21.3044	59.1351	3.75657	52.1554	441.975	44.843	1.14627	15.9491	135.133	77.219	4.90284	68.1045	577.109	0.435	0.209	0.139667	0.383667	0.0513333	0.226	0.0693333	0.295333	0.157667	46.6449	19.0708	395.135	11.7953	2.175	5.61	3.8925	21.5
124	28.3667	0.7	15.4882	52.9618	3.62935	47.3077	443.571	47.636	1.5189	19.8242	185.595	75.1592	5.14825	67.1319	629.167	0.343333	0.181333	0.113667	0.306667	0.0366667	0.162	0.0676667	0.229667	0.144667	43.4231	20.5789	407.062	10.6775	2.32667	5.70333	4.015	25
127	27.9333	0.8	17.4304	68.8933	3.71464	57.7494	357.326	68.9437	1.097	17.0578	105.918	89.2286	4.81164	74.8072	463.244	0.323667	0.136333	0.0813333	0.271333	0.0523333	0.187333	0.055	0.242333	0.084	51.8182	16.1846	321.29	16.1421	2.125	5.88	4.0025	25.3333
128	27.3	0.7	14.9058	56.1408	2.7729	47.5076	320.498	55.2814	1.04227	19.2471	119.031	79.3444	3.81517	66.7547	439.529	0.24	0.122333	0.0773333	0.202333	0.0376667	0.117667	0.045	0.162667	0.0846667	61.399	14.1642	381.12	16.1974	2.06	5.52	3.79	30.1667
143	31.8333	0.8	20.0096	57.605	4.07762	51.2276	466.019	51.2939	1.5277	19.1636	174.656	79.1498	5.60532	70.3912	640.675	0.455667	0.221333	0.134	0.405333	0.0503333	0.234333	0.0873333	0.321667	0.171	41.8971	21.3074	381.528	11.0194	2.4175	6.745	4.58125	26.75
144	31.1333	0.866667	21.0288	75.9062	4.66503	66.7062	550.487	91.9613	1.4197	19.8229	162.511	98.4833	6.08473	86.5291	712.998	0.425667	0.141333	0.0573333	0.374	0.0516667	0.284333	0.084	0.368333	0.0896667	47.4909	18.535	391.543	12.1382	2.115	6.01667	4.06583	19.1667
146	28	0.8	17.472	60.8823	3.4964	53.2275	423.64	59.0526	1.31415	19.9922	159.025	83.7516	4.81055	73.2198	582.665	0.331667	0.155333	0.089	0.29	0.0416667	0.176333	0.0663333	0.242667	0.113667	50.7584	17.247	404.327	12.5605	2.08	5.90333	3.99167	26.1667
CS	34.8	0.633333	17.3004	55.1959	3.48147	48.8089	424.259	44.9436	1.26601	17.737	154.352	75.2508	4.74747	66.546	578.611	0.348667	0.178667	0.117	0.308333	0.0403333	0.17	0.0616667	0.231667	0.138333	47.6896	18.9841	410.333	11.5588				25
SQ	22.4333	0.733333	12.7972	65.8316	3.93154	54.7482	325.502	81.1051	1.65578	22.9813	136.541	93.4694	5.58732	77.7295	462.044	0.265	0.12	0.059	0.220333	0.0446667	0.145	0.061	0.206	0.0753333	46.607	17.9346	277.1	16.8495				26.3333

[truncated: 4 more sheets: All data 2008, Correlation matrix all 2009, All mn data 2009, All data 2009]
