# Supplementary material for: Genetic analysis of water loss of excised leaves associated with drought tolerance in wheat
Source: PeerJ. 2018 Jul 6;6:e5063. doi: 10.7717/peerj.5063 (PMC6037134; doi:10.7717/peerj.5063)
Supplement: Supplemental Information 4 [file peerj-06-5063-s010.xls]

## Sheet: All data for F-W plots
			New	New			New						New												New	New
CSDH	Yield/plant_S_Spain99	GrWt/plant/NFF_1994	Yield	dYield 2012	Yield/pl_droughted_Zaj06	Grain_wt/plant_rain_Kaz00adj	dYield 2011	Yield/pl_mn_Droughted_Zaj05	Diff_ear_dwt_SUSTExp2	moddrought_Yield/plant_T14_Krakow08	Yield/plant_sev_dr_Krakow10	Yield/pl_control_Zaj06	cYield 2013	Yield/pl_mn_Rainfed_Zaj05	GrainYd/plant_(Ht_adj)_N1_97	cont_Yield/plant_T35_Krakow08	Regr_adj_Yd/plant_Zaj02	Grain_yd/plant_irrig_Kaz00	Yield/plant_M_Spain99	Yield/plant_sev_drought_Krakow07	Yield/plant_rainfed_Zaj01	Grain_wt/plant/GH/1994	Yield/plant_irrig_Zaj01	GrainYield/plant_N2_97	cYield 2011	cYield 2012	GrainYd/plant_(Ht_adj)_N3_97	Yield/plant_cont_Krakow10	Yield/plant_mod_drought_Krakow07	Grain_yd/plant_A_Kaz98	Yield/plant_rain_Zaj00	Consel 2003(50pl/row)	Vern_Total_yield/pl_Krakow06	Yield/plant_control_Krakow07	Grain_wt/plant/Mor_1994	75ppb_Mn_Grain_wt/pl_03	GrainYd/plant_(Hr_adj)_N1_98	NFA_Mn_Grain_wt/pl_03	Non-vern_Total_yield/pl_Krakow06	GrainYd/plant_(Ht_adj)_N2_98	Conselice_Yield/plant_04	Yield_g/plant_adj(2,80)_Idice03	Grain_yd/plant_B_Kaz98	Yield/plant_irrig_Zaj00	GrainYield/plant_N3_98	Idice_Mn_Yield/plant_13%_04	Total_yield/plant_75ppb_05	Grain_yd/plant_A_Kaz99	Total_yield/plant_NFA_05
Mean	0.10375	0.652566	0.665461	0.810144	0.914526	1.00081	1.29895	1.38747	1.39001	1.39573	1.42819	1.45558	1.46676	1.90537	1.92421	2.1556	2.20612	2.26689	2.414	2.42426	2.45568	2.47	2.53432	2.63168	2.7365	2.85196	2.98116	3.04234	3.18269	3.19613	3.22173	3.25	3.52191	3.59	3.61	3.76682	3.86095	3.97202	4.081	4.34189	4.42	4.437	4.57978	4.64389	4.71242	4.96578	5.53	6.37733	6.64989
1	0.23	0.4505	0.521333	0.617	0.8	1.21	1.835	1.14	0.87	1.568	1.38	1.48	1.28067	1.63	2.15	2.74	1.796	3.05	4.03	3.51	1.96	1.96951	2.13	2.37	2.53367	3.38633	2.69	2.63	2.1	3.03	2.875	3.58	3.3	3.32	2.88696	3.73	1.93	3.71	4.16	3.81	3.7	4.3129	2.18	3.231	4.68	4.58993	3.81	8.23	5.83
2	0.272	0.7545	0.591	1.577	0.87	0.28	1.96833	1.38	1.091	1.552	2.38	1.58	1.97033	1.93	1.64	2.04	1.43	2.6	4.97	2.62	2.19	2.51829	2.39	2.47	1.62667	2.83067	2.92	3.29	2.68	4.48	3.482	3.0118	2.82	3.84	3.5413	3.33	2.85	2.62	3.9	4.02	4.86		2.92	4.965	4.8	4.87399	6.39	9.2	7.22
3	0.036	0.4005	0.727667	0.489333	0.92		1.10467	1.41	0.954	1.351	0.49	1.53	1.601	2.17	1.59	2.55	2.873	1.46	1.38	2.1	2.78	2.15122	2.75	2.72	3.99867	3.323	2.17	3.04	4.1	3.76	2.795	3.0752	3.37	3.3	3.35217	2.76	5.35	3.33	2.49	5.99	5.58	5.99969	4.86	5.222	4.54	5.12926	5.05	5.52	6.93
4	0.107	0.636	0.434	0.913667	0.81		1.59167	1.19	0.891	1.861	1.86	1.4	1.78067	1.84	1.93	2.14	1.865		2.5	3	2.01		2.28	2.26	3.74933	3.34567	2.54	2.86	3.19	3.37	3.154	3.9092	3.02	3.1	2.7413	2.73	3.08	2.24	2.12	3.36	2.7	3.65657	1.77	5.892	6.75	3.76945	4.49		3.76
5	0.06	0.696	0.718667	0.560333	0.98	0.82	1.40633	1.41	2.079	1.464	1.27	1.45	1.562	1.73	1.62	3.21	2.585	1.92	1.19	2.87	2.1	3.20488	2.29	2.53	2.56833	3.288	2.77	3.49	4.95	7.34	3.27	3.393	6.43	5.25	3.7413	4.48	2.9	5.18	7.46	3.17	4.16	3.9775	6.14	4.23	3.89	7.31431	7.83	3.84	8.12
6	0.063	0.803			1.03			1.45				1.43		1.8	1.68		2.301		4.87		2.28		2.55	2.5			3.68			5.21	4.175	3.5602	3.29		4.73478	3.95	4.63	4.26	4.08	4.89	4.12	5.92624	6.77	5.308	5.14	6.20251	5.66		6.76
7	0.121	0.841	0.804	0.456333	1.14		1.61433	1.55	1.93	1.582	1.36	1.63	1.67567	1.97	1.67	2.1	1.75		1.1	2.66	2.84		2.96	1.64	2.44467	2.23333	2.81	3.66	3.62	2.84	3.82	3.5108	2.22	2.91	4.57826	4.92	4.51	3.45	4.5	5.44	7.1	4.74423	3.4	4.548	3.75	5.64566	5.44		6.34
8		0.72	0.818333	0.629	1.09	0.59	1.857	1.45	1.635	1.745	0.9	1.65	1.38633	1.98	1.91	2.65	2.292		1.68	2.61	3.13	2.79512	3.08	2.48	3.53733	4.328	3.57	2.65	4.43	2.13	3.292	3.4404	4.17	3.71	3.42174	6.26	3.24	5.38	1.67	3.52	5.56	5.23404	9.22	4.41	4.54	5.8574	6.48	6.3	8.29
9	0.032	0.8725	0.835	0.454	1.06	0.46	1.143	1.7	1.686	1.535	1.7	1.76	1.704	2.46	1.83	2.3	2.351	3.64	2.61	2.22	3.93	1.87561	3.85	2.16	3.006	3.17767	2.64	2.27	2.35	1.18	2.96	4.0558	3.03	3.8	3.41957	4.73	4.78	5	5.74	4.92	4.52	4.70521	5.88	4.818	7.49	4.48623	6.75	6.26	6.2
10	0.015	0.9375	0.86	0.0413333	1.02	0.31	1.45133	1.51	1.709	1.349	1.64	1.63	1.694	2.35	2.72	2.52	2.839	1.6	1.69	1.46	2.93	3.62195	3.16	3.6	2.874	2.21533	4.27	1.42	3.8	5.16	4.269	4.7688	2.37	3.96	3.76087	4.6	4.84	4.14	5.73	5.23	5.72	4.46791	6.6	6.965	5.06	4.60256	6.9	5.07	7.71
11	0.135	0.5825	0.403	0.654333	0.85	0.72	1.28433	1.48	1.28	1.235	1.36	1.55	1.42767	2.04	1.77	2.76	1.469	1.13	1.99	2.81	2.86	1.7	2.81	2.74	3.124	2.71533	3.77	2.5	3.95	3.94	2.631	4.7336	2.27	4.75	3.55217	3.73	4.03	3.72	5.12	4.09	3.66	3.54706	5.07	4.685	5.34	3.77902	4.54	5.19	5.64
12	0.147	0.34			0.95	0.62		1.52	1.52	1.31	1.36	1.53		1.92	1.82	1.6	2.803	2.2	4.27	1.78	2.12	2.52927	2.35	2.14			2.82	2.9	4.12	3.36	3.582	1.99	3.37	4.39	5.17174	5.11	3.86	5.67	3.28	4.14	5.64	5.48299	6.35	4.825	4.85	7.60159	6.12	6.56	6.5
13	0.316	1.026	0.673333	0.989667	0.89	1.3	1.97733	1.31	1.15	1.783	2.03	1.34	1.82933	1.96	2.23	1.56	3.47	3.53	0.94	2.75	2.54	3.28415	2.51	2.81	2.4	3.29833	5.16	3.05	3.62	2.83	3.183	3.0824	4.18	5.2	4.32391	5.26	3.72	4.77	2.75	4.64	3.16	5.22546	3.91	4.822	4.41	5.88681	6.13	8.35	7.04
14	0.043	0.7785	0.932667	0.721667	0.82	0.24	1.60067	1.17	1.305	0.892	1.84	1.3	1.72167	1.68	1.47	1.48	2.296	1.67	2.64	2.32	1.88	2.37195	1.96	3.18	2.969	3.30567	2.85	2.11	2.25	3.3	2.44	3.946	1.96	2.96	2.73043	4.09	4.77	3.59	5.26	4.78	3.56	5.50026	6.42	4.052	4.22	6.08465	5.19	6.3	5.98
15	0.113	0.5495	1.02067	1.67433	1.2	0.26	1.64533	1.58	1.705	1.31	1.39	1.66	1.6	2.16	1.46	2.25	2.054	1.11	3.3	2.35	2.83	1.86098	2.86	2.41	2.63867	2.608	2.7	2.45	2.94	2.83	3.55	3.7138	3.26	3.13	4.13913	3.55	4.93	5.3		4.54	4.58	5.0598	6.24	4.972	4.63	5.05517	6.74	4.82	7.32
16	0.088	0.33			0.93	0.84		1.33	1.215	1.684	1.7	1.18		1.72	1.92	2.39	1.997	2.37	1.41	2.71	2.86	1.83293	2.83	2.38			3.12	3.97	2.18	2.63	2.243	3.335	4.56	3.22	4.11304	5.23	1.87	5.52	3.55	2.81	2.22	3.48927	6.29	3.844	3.38	3.59811	6.01	3.99	8.17
17	0.033	0.5015	0.617	0.76	0.97	0.72	1.18967	1.44	1.39	1.092	1.37	1.4	1.75467	1.91	1.96	1.18	1.838	2.37	1.87	2.17	2.56	2.69634	2.56	2.47	2.25533	2.31233	3.35	2.82	3.13	2.73	2.167	3.7696	3.64	3.89	3.72609	5.42	4.38	4.98	3.53	6.59	3.94	4.28652	6.18	3.085	7.28	5.31836	5.29	5.56	6.94
18	0.207	0.786	0.397	0.853667	1.24	2.98	1.41867	1.62	2	1.501	1.16	1.71	1.821	2.16	2.68	1.93	3.069	1.98	1.68	2.15	3.4	2.84268	3.75	4.05	3.69733	3.94467	4.33	3.37	4.13	4.49	3.648	4.4896	4.58	4.91	3.7	4.09	4.2	2.73	4.47	5.18	4.1	5.75226	3.21	5.281	5.29	4.75296	4.4	6.43	6.82
19	0.09		0.621	1.62767	0.86	1.5	1.76433	1.33	1.019	1.287	1.34	1.43	1.36733	1.84	2.15	2.21	1.989	2.35	2.95	1.86	2.02		2.29	2.9	3.24467	3.12233	2.11	3.14	3.51	3.76	3.881	3.4462	2.88	3.27		3.88	2.94	5.18	3.03	5.75	5.18	4.28518	4.6	5.48	3.38	5.36436	5.98	5.62	7.38
20	0.124	0.6275	0.980667	1.48067	1.01	0.47	1.31267	1.58	1.077	1.155	1.93	1.56	1.81767	2.11	2.62	2.28	2.569	2.2	3.09	3.59	2.91	3.25	2.97	3.53	2.53233	2.31833	3.77	3.48	3.26	2.24	3.8	4.6176	4.97		3.98913	4.47	3.83	5.03		5.49	3.86	5.44696	2.62	4.676	6.52	5.9214	5.46	6.11	7.68
21	0	0.8675	0.822667	0.811	0.85	1.6	0.541667	1.4	1.83	1.653	1.53	1.53	1.46433	1.98	2.35	2.02	2.014	2.49	1.13	2.47	2.74	3.34146	2.8	3.01	2.053	2.99833	3.21	2.92	3.02	1.91	2.704	3.3638	5.48	2.49	4.38478	4.63	3.02	4.38	7.15	3.73	2.92	4.04284	5.46	4.223	3.85	5.21892	5.66	7.39	6.21
22	0.097	0.7875	1.04567	0.532667	1.17	1.29	1.37567	1.55	1.565		1.51	1.82	1.647	2.01	2.63	1.74	2.042	2.1	3.01	2.16	2.99	2.61829	2.93	3.07	3.88267	3.606	4.44	3.12	2.55	3.94	2.964	3.2696	3.04	4.09	3.80435	5.39	6.57	4.41	4.36	6.23	6.16	4.69	4.2	4.596	5.71	6.66022	6.02	7.11	7.01
23			1.01933	1.28133	0.95	1.13	1.465	1.53	1.56	1.828	1.37	1.53	1.59433	1.96	2.18	2.96	2.988	2.21	1.56	2.24	2.97	3.58293	3.24	3.89	3.50733	3.069	3.64	2.21	2.51	2.66	3.31	3.6556		2.44	3.31739	4.09	4.98	4.42	4.62	4.59	4.6	6.39327	7.94	3.81	6.86	4.17462	6.95	8.93	7.26
24	0.211	0.482	1.35667	0.843	1.1	1.11	1.81167	1.59	1.529	1.837	1.57	1.72	2.081	2.25	1.7	1.78	2.652	3.33	2.63	3.35	3.4	2.52317	3.4	2.95	3.68367	4.16067	3.68	3.16	4.47	4.28	3.458	4.7666	2.89	5.29	4.55	3.65	5.26	2.73	5.46	4.31	4.46	4.63479	5.04	5.401	6.47	4.85885	6.86	10.76	6.78
25	0.061	0.786	1.041	1.54933	0.9		1.15267	1.44	1.08	1.687	1.27	1.47	1.86	1.93	1.59	2.23	3.231		2.03	2.12	1.57		1.93	1.91	3.77533	3.764	1.75	3.69	2.95	1.15	3.065		2.91	3.64	1.31304	2.98	2.6	3.31	2.06	3.99	4.62	4.90278	1.15	4.869	4.65	4.45915	5.87		6.06
26	0.177	0.934	0.661667	3.37167	0.85		2.27233	1.36		2.004	1.97	1.58	2.04067	2.03	1.61	1.99	1.431		5.49	3.05	2.04		2.07	2.24	2.864	3.90033	2.51	4.44	2.93	2.3	2.354	2.7438	3.32	2.98	4.88478	2.66	5.31	2.79	3.88	4.98	3.3	3.30443	1.8	3.395	7.12	5.89266	4.98		7.45
27	0.042		0.716	0.515667	1.03	0.52	1.126	1.39	0.989	1.387	1.57	1.26	1.06867	1.77	1.51	1.49	2.318	2.92	3.21	2.23	2.4	2.37927	2.54	2.03	2.42533	3.40533	2.45	2.62	3.61	2.92	2.621	2.8182	3.82	3.59	3.64565	4.03	3.99	3.89	3.42	3.53	3.62	3.48089	4.31	3.154	4.55	4.04054	5.62	7.38	6.27
28	0.24	0.688	0.786	1.24367	0.91	0.92	0.207667	1.43	1.211	0.616	1	1.42	1.765	1.82	1.63	1.34	2.005		5.51	2.29	2.55	1.87805	2.55	3.37	3.03133	1.53333	1.36	2.43	2.17	3.78	3.271	3.0662	2.73		5.84565	2.66	4.27	3.29	3.83	6.09	4.98	5.12523	4	5.305	6.11	6.10168	4.43	3.69	4.72
29	0.017	0.69	0.325	0.830333	0.97		1.10933	1.4	0.915	1.483	1.85	1.34	1.133	1.73	1.7	1.39	2.515		2.37	2.6	2.61		2.59	2.58	2.24	2.39033	3.96	2.13	3.48	3.94	3.256	3.369	3.29	4.17	3.73261	1.82	4.27	2.78		5.21	3.7	3.78851	3.68	4.751	6.48	3.74962	5.72		5.6
30	0.225	0.6095	0	0.508333	0.89	1.62	1.20033	1.41	1.809	1.377	1.6	1.31	1.05267	1.72	2.1	1.88	1.359	1.68	4.27	1.92	2.79	2.66341	2.74	2.52	1.794	2.60967	3	2.24	3.34	2.02	3.196	2.6772	2.79	3.08	2.92174		2.91		5.53	3.03	2.72	5.0432	5	3.563	6.17		5.33	6.33	7.79
31	0.034	0.592	0.358333	0.445	1.3		1.467	1.77	1.821	1.37	1.61	1.87	1.51733	2.42	1.83	2.11	2.475		1.95	2.78	3.27	2.46341	3.41	3.1	3.55433	2.58567	3.32	3.69	4.32	2.6	4.393	2.5646	4.53	4.7	2.94783	2.38	4.56	3.46	2.84	4.39	3.92	4.6969	2.32	5.68	5.22	5.03851	6.38		7.73
32	0.141	0.878	0.549667	0.728333	0.95	0.59	1.703	1.59	1.585	1.513	1.15	1.55	1.66667	2.09	1.97	1.97	5	1.86	3.12	2.93	2.4	1.84634	2.61	2.37	3.22033	2.66733	2.77	3.58	3.83	5.31	3.829	3.5294	4.92	2.94	4.5587	4.66	3.98	4.48	4.16	4.53	2.58	5.15443	4.82	4.963	4.27	5.16812	6.59	5.1	7.3
33	0.187	0.8945	0	0.333333	0.98	1.83	2.06167	1.61	1.445	1.493	1.91	1.67	1.502	2.36	2.55	2.55	1.976	4.04	3.31	2.86	2.46	2.77439	2.54	2.8	2.52367	3.07233	3.22	2.84	3.97	5.72	3.708	3.2324	1.89	4.16	4.15217	3.99	4.38	3.86	4.39	4.14	3.24	3.48416	5.57	4.323	3.97	5.42744	5.38	10.44	6.72
34	0.158	0.6125	0.559333	0.479667	0.84	0.67	0.642333	1.26	1.299	1.581	1.03	1.31	1.201	1.61	1.59	1.91	1.018	2.32	2.5	1.93	2.88	2.02195	2.89	1.9	2.69933	2.41033	2.58	2.67	2.38	1.84	2.355	2.7458	3.54	2.12	1.73913	2.28	2.72	2.94	5.31	3.57	3.24	3.75713	2.93	4.607	2.93	3.33536	4.97	4.13	4.7
35	0.028	0.5425	0	0.674	0.86	1.24	0.922	1.29		1.397	1.43	1.39	0.87	1.73	2.26	1.75	1.784	1.55	0.56	2.21	1.73	2.73902	1.93	1.85	2.078	2.055	2.31	3.52	2.77	3.1	2.469	3.3914	3.15	2.96	2.27391		3.06		4.52	3.37	4.84	4.89862	2.55	2.727	3.06	4.85257	4.99	5.68	5.46
36	0	0.587	0.297333	0.201	0.96	0.1	0.424667	1.34	1.345		1.26	1.51	0.871	1.72	2.04	1.9	1.792		1.11	2	3.01	1.20976	2.97	2.91	2.88633	2.598	2.98	2.52	2.58	3.48	2.374	3.428	3.39	2.79	3.80652	2.05	5.57	2.33	2.45	4.55	3.48	3.48354	4.94	3.803	4.46	3.83419	4.43	6.75	6.33
37	0.136	0.696	0.701333	0.566667	0.88	1.44	0.505	1.3	1.45	1.346	1.31	1.37	0.854667	1.71	1.84	1.76	1.508	1.94	0.93	2.09	2.66	1.4622	2.57	2.5	2.51467	2.81167	3.59	2.33	2.19	5.22	2.61	3.3076	3.36	2.5	2.64565	3.28	3.56	4.55	4.43	3.83	3.86	4.72012	10.84	4.409	4.34	4.59078	5.79	5.45	5.71
38	0.061	0.566	0.152667	0.399333	0.72	0.93	0.959667	1.06	1.33	1.4	1.36	1.24	1.25633	1.52	1.17	0.88	2.201	2.05	1.73	1.39	1.55	1.54634	1.49	1.66	1.992	2.447	2.13	2.6	1.58	4.88	1.843	3.0526	2.01	1.62	2.85435	1.59	2.51	1.08	2.94	1.86	4.68	3.2946	4.3	3.728	2.15	2.61553	1.74	4.49	3.96
39	0.093	0.693	1.36333	0.649333	0.84	0.86	1.37133	1.39	1.375	1.702	1.62	1.5	1.59567	1.84	2.31	1.47	1.412	2.41	2.91	2.76	2.18	3.05488	2.32	4.09	2.35867	2.867	2.87	3.32	3.27	3.09	3.88	2.7348	4.75	2.68	3.30652	5.62	3.73	4.69	3.71	4.03	4.42	3.95446	4.74	4.025	3.24	6.20766	6.04	6.22	7.87
40	0.143	0.47	0.662	0.478667	0.72	0.3	1.412	1.02	1.09	1.19	1.75	1.14	1.18567	1.41	1.89	1.34	1.51	1.01	1.82	2.16	1.59	2.67317	1.53	2.46	2.23	2.02567	3.4	2.41	3.27	2.46	1.8	2.7388	2.76	2.5	4.07826	2.44	2.39	2.52	2.68	2.58	2.92	3.95261	3.58	3.513	2.82	3.6314	3.55	3.54	5.26
41	0.069	0.325	0.602	0.0983333	0.86	0.12	1.39033	1.43	1.215	1.177	1.2	1.37	1.457	1.89	1.35	1.15	1.764	3.17	3.8	1.25	2.73		3.05	1.17	2.824	1.63033	1.6	2.68	2.47	4.24	2.73	2.5958	1.26	1.75	2.83043	0.99	5.2	1.33	0.56	7.02	4.06	2.5103	3.08	4.468	5.64	3.67989	4.96	3.86	3.6
42	0.008	0.335	0.847667	0	0.81		1.26567	1.17	0.901	1.349	0.85	1.27	1.73133	1.63	0.91		2.2		0.66	1.45	1.85		1.94	1.4	2.01833	2.25533	1.87	2.57		4.96	1.811	2.1464	3.01	3.51	3.39783	2.49	3.85	1.66	0.23	4.35	3.4	1.98437	1.15	3.418	3.04	3.16852	2.4		3.42
43	0.009	0.428	0.559667	0.951	0.85	1.32	1.70667	1.31		1.032	1.52	1.23	1.38867	1.65	1.77	1.26	2.154	3.07	2.59	2.71	2.01	2.14634	2.05	3.08	4.07967	3.64167	2.74	3.94	2.28	1.68	2.87	3.1676	5.3	4.77	3.22609	3.53	5.4	2.63	5.39	4.88	5.42	3.96248	6.41	4.307	4.66	4.02183	5.57	8.88	6.63
44	0.018	0.419			0.92	1.28		1.38	1.319	1.891	1.35	1.29	*	1.7	2.21	0.75	1.849	2.48	1.2	3.22	2.92	2.36585	3	2.72			3.57	3.59	3.89	4.24	3.074	3.6634	3.18	4.85	2.64783	3.87	5.26	3.3	7.13	4.1	5.4	5.56551	5.66	4.564	4.13	6.21697	4.15	5.47	5.62
45	0.1	0.7105	0.593	1.04967	0.82		1.65567	1.26	1.6	1.368	0.93	1.51	1.52833	1.8	1.77		1.139		2.79	2.19	1.76		1.92	2.44	2.57833	2.931	2.89	2.26	2.89	4.96	3.541	3.8778	5.2	3.48	4.55435	2.52	2.82	4.32	2.78	4.24	2.32	3.18281	3.92	4.636	3.16	5.49529	5.45		7.03
46	0.113	0.9125	0.806667	0.747667	0.89	0.53	1.64967	1.42	1.68	1.325	1.19	1.36	1.46667	1.8	2.62	2.45	1.567	2.51	2.13	3.13	1.69	3.45976	1.74	3.28	2.393	3.49967	3.56	2.93	3.88	1.68	3.526	2.6952	4.62	3.61	3.6587	6.05	3.26	5.42	4.8	4.07	5.12	3.94689	8.07	4.547	4.52	5.60503	6.76	8.15	8.59
47	0.319	0.7645	0.728333	0.522333	0.81	1.12	1.185	1.28	1.606	0.835	1.22	1.26	1.41167	1.71	1.54	1.52	2.166	1.73	3.01	1.37	2.32		2.4	2.19	2.44833	2.52067	2.38	2.99	1.98	4.96	2.511	4.5988	1.59	1.93	2.73913	1.41	4.46	1.43	2.87	5.64		4.81501	2.49	3.371	4.92	3.9696	3.24	4.26	4.6
48	0.012	0.45	0.972333	0.592	0.85	0.63	1.392	1.46	1.709	1.203	1.3	1.63	1.49433	2.21	2.15	2.57	3.376	1.51	1.34	2.69	2.41	3.27439	2.66	2.99	3.42133	2.77267	3.18	3.55	4.27		3.979	3.4534	4.43	4.14	4.13478	5.07	5.32	3.23	6.08	5.19	5.02	5.83075	4.28	5.791	5.84	5.26098	6.86	8.82	7.33
49	0.064	0.4	1.122	0.380333	0.8	0.94	1.21567	1.15	1.049	0.622	1.08	1.42	1.64933	1.6	1.17	1.68	2.42	4.26	1.86	0.75	1.69	1.93415	1.64	1.69	2.63833	1.51867	1.93	2.7	1.65	5.22	1.969	3.2958	1.51	1.38	1.70652	1.76	4.02	2.39	1.98	3.13	3.6	3.00819	6.78	3.44	5.45	2.56613	3.02	7.27	4.46
50	0.062	0.4545	0.941667	0.409333	0.94	0.47	0.755	1.48	1.09	0.928	1.18	1.48	1.123	1.9	1.36	2.5	2.156	2.3	1.95	2.45	2.7	2.7	2.87	1.61	1.93	2.438	2.23	2.44	3.28	3.48	2.419	3.1034	3.57	3.23	4.41304	1.72	4.63	3.7	3.51	5.95	3.7	4.11155	6.49	3.292	4.74	4.82998	9.57	7.22	5.79
51	0.044	0.6965	1.34933	0.411	0.88	0.31	1.932	1.47	1.519	1.325	1.19	1.58	1.703	2.1	2.52	2.22	2.027	3.32	1.43	2.58	2.18	3.41585	2.24	3.19	2.47633	2.94933	3.53	3.95	3.54	3.1	2.656	2.7754	4.34	4.51	5.31522	3.87	3.61	5.12	4.62	4.09	4.96	3.79341	5.17	3.336	5.28	5.25232	5.89	7.78	9
52	0.068	0.7405	0.915667	0.914	0.93	2.46	1.271	1.5	1.575	1.462	1.68	1.42	1.67933	1.87	1.99	1.85	1.65	2.56	2.73	2.36	2.09	2.90732	2.09	3.01	2.42767	3.39333	3.1	2.8	3.34	2.02	3.934	3.3846	4.22	4.23	3.61739	4.52	3.44	4.03	4.16	4.08	4.7	4.68847	6.53	4.92	4.48	5.65324	6.89	6.17	7.11
53	0.05	0.444	0.419667	1.39767	0.85	1.05	1.60633	1.42	1.56		1.01	1.4	1.47733	1.94	1.83	2.82	3.13	1.95	2.05	2.82	2.53	3.15122	2.81	3.07	2.427	2.68733	2.58	3.96	3.75	3.56	2.871	3.4882	4.61	4.74	3.98696	5.21	4.04	5.4	6.38	5.58	4.74	5.3819	4.17	5.283	5.02	4.49863	6.45	3.88	9.17
54	0.193	0.861	0.738333	0.204	1.06	0.74	1.86233	1.61	1.819	1.522	1.23	1.62	1.63433	2.19	2.01	1.72	2.923	2.99	1.06	2.39	2.98		3.21	3.42	2.79933	2.89167	3.08	3.01	3.71	2.9	3.837	3.4456	3.12	4.73	3.29565	2.52	4.32	3.24	5.02	4.93	4.3	4.30286	3.35	5.501	5.12	6.3555	5.92	6.15	8.04
55	0.063	0.6665	0.61	0.486667	0.75		1.50567	1.27	1.525	1.385	1.26	1.44	0.968	1.83	1.99	1.25	1.608		2.95	1.98	2.16		2.15	2.83	3.111	2.44333	2.94	1.96	3.59	3.11	2.873	2.9238	2.88	3.37	3.31739	3.02	3.42	3.93	1.58	4.66	3.64	2.91278	2.65	4.553	4.3	5.58329	3.99		6.07
56	0.134	0.926	0.718333	0.697667	0.77	1.12	1.019	1.32	1.35	0.846	1.28	1.55	1.613	1.94	2.99	2.24	1.282	2.01	2.84	3.31	2.22	3.44024	2.31	2.87	2.43467	3.489	4.49	3.29	3.86	3.86	3.536	3.0094	3.35	4.38	5.11304	4.66	4.2	5.06	4.41	5.44	4.1	5.63866	7.2	5.311	4.69	6.49488	7	9.52	7.9
57	0.152	0.3965	1.523	0.974	0.9	1.34	1.33633	1.39	1.014	1.074	1.87	1.45	1.65433	1.94	2.04	1.45	2.371	1.86	0.94	1.95	2.84	2.71341	3.03	2.24	2.28167	2.81333	1.91	2.84	3.89	2.97	3.129	3.7096	2.56	4.66	4.27391	4.65	3.51	4.69	4.61	3.3	4.32	4.48291	8.36	5.261	4.56	5.98191	7.17	5.97	7.95
58	0.253	0.809	0.655333	1.345	0.97	1.52	2.061	1.53	1.42	1.837	1.64	1.67	1.55733	2.22	2.16	2.89	2.756	3.47	3.99	2.97	2.73	2.40732	2.83	3.3	2.397	2.41967	3.51	3.71	3.82	2.95	4.338	3.6502	4.92	4.08	4.12609	4.66	4.61	5.69	3.72	4.11	6.58	4.29138	7.31	5.605	4.91	6.66661	7.34	9.9	8.81
59	0	0.3365	0.860333	0.756	0.64	0.48	0.599	0.93		1.472	1.21	0.95	1.46733	1.17	1.47	1.94	1.398	1.65	3.22	2.78	1.14		1.36	1.79	1.78933	2.55067	2.52	2.5	2.53	3.83	3.346	2.7812	1.9	2.89	2.82826		2.37		3.75	2.18	5.72	3.23484	3.83	4.975	2.64	5.50334	4.72	6.96	4.87
60	0.062	0.3985	0.717667	0.716333	0.94	2.13	1.71933	1.45	0.905	1.537	1.68	1.48	1.60567	2.04	2.63	2.28	1.998	1.75	3.83	2.6	2.48	2.70366	2.5	2.22	2.097	2.134	3.63	2.85	3.12	3.6	3.664	2.8068	5.28	2.72	5.06087		2.77		4.41	2.99	4.14	3.65329	6.04	4.628	2.54	5.12152	5.61	4.01	6.07
61	0.135	0.709	0.333667	1.02833	0.72	1.26	1.04	1.26	0.99	0.935	1.62	1.4	1.026	1.81	1.79	1.66	1.287	2.48	2.38	1.84	2.99	2.45976	2.99	3.24	1.54333	3.15767	3.01	2.81	2.51	3.29		2.1888	6.07	2.69	3.65652	4.04	3.12	3.39	3.78	3.8	5.02	5.20903	4.7		5.23	4.75809	6.06	6.1	6.28
62	0.019	0.71	0	0.838333	1.02	1.19	0.971667	1.5	1.611	1.167	1.44	1.62	1.02167	2.07	1.8	2.08	1.796	2.44	1.62	2.64	2.4	2.64878	2.59	2.59	2.90567	3.37633	3.27	3.26	2.61	3.98	3.588	2.0826	3.05	3.18	3.55217	3.86	4.54	4.42	1.56	5.18	4.94	4.73979	10.03	5.947	4.42	5.30714	4.72	7.1	6.22
63		0.68	0.569667	1.29767	0.83	0.22	0.796333	1.35		1.345	1.56	1.45	2.07533	2.08	1.77	2.88	3.75	1.87	1.31	1.91	2.41	2.98659	2.75	2.7	2.559	2.74233	3.37	2.58	4.01	2.38	1.853	3.506	2.93	4.21	2.63478	4.22	3.3	4.09	4.48	3.64	4.36	4.65117	2.62	3.532	3.85	5.72352	5.97	5.08	6.96
64	0.115	0.7015	0.921333	1.07867	0.95	1.34	1.30733	1.37	0.985	1.658	1.61	1.33	1.51667	1.95	2.17	3.06	1.851	2.13	1.7	2.6	2.71	2.59756	2.73	2.86	3.31733	3.08867	3.25	2.71	2.4	2.09	3.508	3.7104	2.94	2.29	4.33478	4.52	4.28	3.72	4.24	4.15	4.78	4.49007	5.28	5.609	4.95	5.932	4.17	6.74	6.15
65	0.083	1.0225	0.817333	1.838	1.06	1.77	0.793667	1.58	1.475	1.379	1.98	1.41	1.50133	1.98	1.76	2.97	3.418	1.77	2.12	1.62	2.08	$0	2.18	2.91	1.92767	2.77267	3.73	3.32	3.74	4.05	4.003	2.9952	4.75	3.83	4.13261	4	3.54	5.61	4.51	4.89	3.86	4.39131	3.71	4.4	4.97	4.53938	6.21		7.25
66	0.077	0.6465	0.324333	0.66	0.91	2.23	1.76567	1.39		1.275	1.6	1.25	1.53067	1.96	2.39	2.7	2.766	2.41	1.74	2.03	3.17	2.51951	3.14	3.3	3.68667	4.413	3.3	3.68	3.31	4.68	4.064	2.2626	2.3	3.74	4.46087		3.82	5.55	3.24	5.22	4.7	3.47578	6.26	5	5.94	6.59862	6.48	6.32	8.99
67	0.348	0.775	0.506667	0.648	0.71	0.99	1.72967	1.24	1.075	1.405	1.07	1.36	1.529	1.66	2.11	2.76	1.448	2.17	3.43	2.81	2.37	2.81463	2.4	2.17	2.719	2.68	2.43	3.35	3.15	2.48	3.518	3.1558	4.38	3.18	3.36304	4.6	3.13	5.21	3.75	3.69	4.02	3.85249	2.95	4.442	4.6	4.15485	5.97	4.69	7.36
69	0.054	0.743	0.723333	1.96967	0.99		1.84367	1.54	1.219	1.321	0.96	1.44	1.59233	2.03	2	1.64	3.569		1.58	2.86	2.66	0	2.62	3.29	3.54	3.10167	2.46	2.6	2.72	3.34	3.028	3.4966	2.82	3.85	4.0587	3.7	3.9	4.9	3.08	5.43	4.08	5.66044	1.6	3.811	5.7	5.11739	3.21		7
70	0.221	0.5635	0.662667	0.933	0.83	0.68	1.28667	1.29	1.095	2.058	2.06	1.12	1.34933	1.64	2.16	2.12	2.228	2.47	1.85	2.57	1.79	2.38902	2.03	3.18	1.892	2.70367	3.15	3.25	2.45	2.41	3.74	3.629	3.45	3.02	2.51522	4.65	1.89	5.27	3.69	2.3	3.3	3.62998	5.98	4.877	3.52	4.17901	3.9	4.79	6.24
71	0.102	0.9655	0.681667	1.70733	0.81	0.34	1.69767	1.31	1.58	1.997	1.22	1.5	1.985	1.85	2.06	2.94	1.857	2.05	2.96	1.93	2.19	2.66098	2.27	2.19	2.54033	3.284	4	4.11	4.27	2.87	3.537	2.8766	5.17	4.81	5.94783	4.84	2.82	4.33		4.39	3.54	5.08724	5.8	4.357	4.02	5.66927	5.67	9.25	7.05
72	0.095	0.452	0.414667	0.792333	0.74	1.22	1.09733	1.12	1.386	1.727	1.37	1.03	1.27867	1.43	1.69	2.38	1.82	1.43	1.79	1.79	2.1	1.9	2.08	1.98	2.105	2.768	2.35	3.16	1.98	1.48	2.53	3.7254	4.67	2.43	3.41522	4.34	2.33	4.35	5.88	2.24	4.34	3.96407	3.8	3.889	2.23	3.08222	4.24	6.17	6.23
80	0.143	0.5805	0.473667	0.45	0.89		1.02567	1.34	1.446	1.063	1.5	1.47	1.232	1.84	1.63	2.27	2.28		0.92	2.45	2.32	1.89024	2.26	2.95	2.92167	2.74567	2.29	3.45	2.05		3.129	2.308	2.79	3.18	3.12174	2.98	4.4	2.99	3.23	4.03	3.26			5.483	4.46	2.97533	4.21		5.56
86	0.11	0.5515	0.272667	0.771667	1.23	1.5	1.04133	1.54	1.46	1.431	0.86	1.66	1.44933	2.03	1.76	2.59	1.723	2.14	2.23	2.37	2.85	2.26951	2.81	2.93	2.76333	3.20733	3.21	2.38	2.07	2.5	2.36	2.5196	2.4	3.87	2.76304	3.41	3.04	4.19	3.95	3.3	4.54	4.46722	2.93	3.706	3.4	5.16634	4.43	5.93	6.16
87	0.075	0.659	0.927333	0.82	1.06	0.52	1.245	1.55	1.7	1.588	1.5	1.77	0.948	2.28	1.76	2.18	2.887	1.61	2.6	2.82	3.06	1.91707	2.8	3.29	3.62167	3.01867	3.06	3.16	2.98	1.27	4.53	3.7874	1.74	3.28	4.75652	3.13	3.45	3.95	7.31	3.5	4	4.37787	5.67	5.368	4.16	4.82717	5.23	6.23	7.1
88	0.055	0.368	0.645333	0.776	1	2.42	0.524667	1.49	1.59	1.29	1.39	1.49	1.37867	1.99	2.29	2.14	2.105	2.08	1.42	2.59	2.87	3.32073	2.88	2.94	2.43867	2.36667	2.51	3.38	3.12	1.26	3.238	2.5024	3.8	3.52	3.41522	3.63	3.27	5.41	6.41	3.88	4.78	4.84951	3.71	4.849	4.76	6.72609	6.74	7.14	6.64
90	0.284	1	0.969	0.107667	1.02	0.73	1.80433	1.6	2.42	1.104	1.33	1.76	1.95133	2.29	2.59	2.48	2.99	4.29	2.56	2.46	2.82	3.45366	2.89	3.23	2.80267	3.63567	4.32	3.81	4.19	1.71	5.356	3.9534	2.51	3.6	4.3087	3.87	4.56	4.8	4.91	4.66	4.48	5.74298	5.93	5.733	5	6.02485	7.95	8.47	11.03
91	0.072	0.612	0.822667	0.123667	1.03	0.25	1.18167	1.62	1.7	1.189	1.65	1.57	1.58367	2.17	2.2	1.67	2.639	3.89	1.69	2.07	3.72	1.51829	3.99	2.64	2.79033	2.77133	3.45	3.46	3.11	3.19	4.685	4.1784	5.84	4.17	2.11739		4.62		6.93	4.5	3.84	5.10172	4.31	5.134	4.57	3.9102	7.49	6.06	7.9
92	0.03	0.4645	0.325	0.217667	0.88	1.76	0.803333	1.35	1.399	1.584	1.67	1.23	0.857667	1.72	1.83	1.27	1.418	1.95	2.11	2.92	2.46	1.83415	2.4	2.38	2.10333	2.483	3.48	1.99	2.82	2.55	3.082	3.1038	3.84	3.34	2.1413	3.31	3.93	2.84	4.69	3.22	4.46	3.66045	1.56	5.156	5.2	4.88765	6.05	6.63	5.98
93	0.071	0.4825	0.634667	0.529333	1.16	0.65	1.402	1.62	1.26	1.377	1.49	1.76	1.21567	2.36	2.4	2.08	3.015	2.35	2	2.31	2.93	3.73415	2.85	2.87	2.15867	3.59233	3.71	2.22	3.53	3.33	4.643	3.5184	4.22	3.54	4.0087	3.9	2.99	4.71	4.9	3.31	3.84	4.03763	4.52	5.608	4.91	4.67829	5.94	9.02	6.72
94	0.033	0.6235	0.106667	0.0823333	0.76	0.45	0.386667	1.28	1.109	0.995	0.66	1.34	0.899667	1.78	1.69	1.71	0.731	1.02	3.42	1.76	2.17	2.58293	2.28	2.17	2.14333	2.64467	1.64	2.81	2.61	1.59	3.359	2.4722	3.55	3.53	3.48696	2.52	3.21	3.5	4.79	3.1	4.92	3.14145	5.27	4.409	5.09	5.72642	3.07	7.01	5.01
96	0.12	0.794			0.82	3.14		1.2		1.492	1.74	1.41	*	1.88	2.18	2.89	2.055	3.18	4.58	2.46	1.91	2.58537	2.01	2.65			4.23	2.45	2	2.14		2.9606	4.06	3.79	4.23478		4.03		5.93	3.58	4.68	4.85012	3.47	4.657	4.02	4.60331	5.67	8.13	6.96
97	0.021	0.7675	0.482333	0.369333	0.69	1.28	1.60967	1	1.365	1.413	1.13	1.38	1.30033	1.65	2.12	2.67	1.207	1.99	1.87	2.65	1.93	2.9	2	2.6	2.41767	3.24533	2.3	3.74	3.12	3.19	2.444	2.8756	3.36	3.99	1.49565	4.77	3.65	5.34	4.92	3.44	2.82	3.55923	8.2	3.797	3.85	6.2858	6.59	2.9	6.67
98	0.411	1.0495	0.609333	2.35733	0.79		1.95433	1.18		1.456	1.47	1.48	2.134	1.9	1.3	2.91	2.014		3.22	2.99	1.86		1.98	1.5	2.89967	2.93367	2.3	4.24	3.85	2.55	3.086	2.5708	3.31	4.6	3.6413	3.24	2.88	3.57	1.21	4.2	2.9	5.09316	$0.55	4.577	4.97	5.49017	6.95		6.5
99	0.013	0.516	0.493	0.440333	0.8	0.49	1.18633	1.18	1.535	1.232	1.42	1.41	1.36833	1.75	1.69	2.71	1.526	0.81	1.8	2.37	2.24	3.36585	2.26	2.25	3.366	2.51233	2.23	3.39	3.5	3.33	3.052		4.78	3.96	3.33913	4.41	2.46	4.16	5.44	3.65	3.08	4.00669	4.46	5.085	3.13	4.52443	6.69	4.58	7.5
102	0.1	0.9335	0.259667	0.834667	0.95		1.34567	1.46	1.521	1.244	1.24	1.67	1.527	2.23	2.16	3.15	2.836		3.26	2.18	2.15		2.24	3.24	3.128	2.08967	3.04	4.04	4.03	3.33	4.038	3.439	2.51	3.57	4.62174	3.18	4.77	4.24	2.94	4.02	6.42	4.96993	2.39	5.78	5.41	5.66941	5.07		7.62
104	0.057		0.747	0.381	1.02		0.55	1.61	0.971	0.798	1.71	1.52	1.67267	2.07	2.44	2.42	2.6	1.16	3.15	2.97	3.44	1.85122	3.54	2.93	2.824	2.499	2.77	2.59	3.09	1.15	3.954	1.9632	4.53	3.67	3.12391	4.22	4.37	3.55	5.28	4.6	3.42	4.51962	2.44	5.58	5.34	4.7231	6.38	2.8	8.8
105	0.007	0.545	0.684	0.896333	0.77		1.51633	1.07	1.339	1.394	1.59	1.06	1.23433	1.55	1.92	2.19	1.957	1.43	2.04	1.56	2.27	1.66707	2.2	3.12	2.99	2.51933	3.75	3.97	2.86	3.54	3.011	3.2616	2.98	1.87	2.92826	3.44	3.74	4.02	4.59	4.48	3.96	5.1125	4.11	4.87	5.98	4.41911	5.61	7.63	7.09
114	0.176	1.024	0.239667	0.455	1.07		0.737	1.56	1.56		1.82	1.5	0.718	2.03	2.16	2.37	2.122		2.62	2.72	3.32		3.34	2.63	2.95867	3.19333	3.12	3.39	3.92	4.63	3.402	3.6192	2.48	3.92	4.41087	4.31	5.76	4.01	3.52	7.85	4.64	5.54505	1.82	5.411	4.08	4.41642	6.22		6.5
115	0.018	0.567		2.68533	1		0.664	1.55	1.066	1.962	1.79	1.69	*	2.3	1.12		2.505		2.09	3.19	2.51		2.48	1.28	3.75167	2.697	1.74	3.71	3.79	3.54	2.917	2.681	3.31	3.95	2.39348	3.99	3.09	3.38		3.26	4.62	4.12311	1.85	6.6	3.94	3.19069	4.86		5.53
124	0.01	0.729	0.737	0.735	0.81	0.95	0.861333	1.17	1.275	1.663	1.36	1.15	0.87	1.72	1.64	3.25	2.281	3.18	0.61	3.53	2.33	1.9378	2.31	3.09	3.24733	3.277	3.4	2.66	3.26	2.88	3.415	1.942	4.13	4.49	2.66522	2.32	4.98	3.39	5.93	4.24	3.3	4.44024	3.7	6.335	5.04	3.30927	5.46	2.57	5.45
127	0.102	0.4165	0.763	0.447333	0.86	1.14	1.60467	1.42	1.325		1.34	1.29	0.856667	1.76	1.71	2.15	3.29	2.29	1.48	2.72	2.31	1.98171	2.31	2.86	1.68733	2.71533	2.39	2.19	2.63	1.44	3.338	2.781	4.42	4.28	2.7413	3.64	2.57	3.94	3.5	2.26	4.62	4.5431	4.17	4.605	5.82	4.25953	3.79	7.11	4.91
128	0.133	0.688	0.606333	0.335667	0.72	0.31	1.17	1.03	1.015	1.277	1.59	1.24	1.16533	1.54	1.88	2.95	2	2.17	3.14	2.69	1.58	3.01585	1.83	2.6	2.227	2.902	3.2	3.02	2.9	1.75	3.198	2.718	3.64	3.98	3.39348	5.18	3.16	5.16	4.17	4.14	4.18	3.55376	5.54	4.148	5.24	5.2475	6.18	8.84	7.3
143	0.053	0.456	1.08133	1.65333	0.84		1.80533	1.37	1.2	1.332	1.77	1.53	1.86133	1.91	1.77	3.61	2.246		1.36	3.62	1.67		1.75	2.62	3.44867	1.587	2.43	4.05	4.91	2.45	3.288	3.9504	4.66	4.83	3.86957	4.56	5.96	6.33	3.18	6.33	3.44	5.37124	2.05	4.487	5.69	5.58945	4.97		6.65
144	0.073	0.4265	0.588333	0	0.81	0.2	0.137	1.2	1.45	1.04	0.47	1.37	1.30833	1.65	1.51	1.33	2.357	1.31	1.03	1.31	2.17		2.13	1.66	2.942	1.65533	1.47	2.94	2.29	3.2	1.77	2.5386	1.17		2.75652	1.74	3.31	1.3	$0.6	4.52	3.44	4.13712		3.09	2.7	4.37752	2.95		4.88
146	0.053	0.678	0.748333	1.05733	0.98		0.996333	1.56	1.829	1.719	1.27	1.51	1.772	2.05	1.6	3.09			7.97	2.54	2.18		2.26	2.11	2.83133	2.58733	2.4	4.05	2.97	3.14	3.666	4.2024	3.39	3.92	5.11739	3.92	5.13	3.61	2.18	8.65	4.46	5.04423	1.8	4.831	7.48	5.94315	5.33		6.67
Mean	0.10375	0.652566	0.665461	0.810144	0.914526	1.00081	1.29895	1.38747	1.39001	1.39573	1.42819	1.45558	1.46676	1.90537	1.92421	2.1556	2.20612	2.26689	2.414	2.42426	2.45568	2.50281	2.53432	2.63168	2.7365	2.85196	2.98116	3.04234	3.18269	3.19613	3.22173	3.24659	3.52191	3.59	3.61228	3.76682	3.86095	3.97202	4.12011	4.34189	4.21766	4.43656	4.62359	4.64389	4.71242	4.99627	5.53	6.37733	6.64989
[truncated: 68 more columns]

## Sheet: ELWLW 0-3h 7-9+F-W plots
			New	New			New						New												New	New
CSDH	Yield/plant_S_Spain99	GrWt/plant/NFF_1994	Yield	dYield 2012	Yield/pl_droughted_Zaj06	Grain_wt/plant_rain_Kaz00adj	dYield 2011	Yield/pl_mn_Droughted_Zaj05	Diff_ear_dwt_SUSTExp2	moddrought_Yield/plant_T14_Krakow08	Yield/plant_sev_dr_Krakow10	Yield/pl_control_Zaj06	cYield 2013	Yield/pl_mn_Rainfed_Zaj05	GrainYd/plant_(Ht_adj)_N1_97	cont_Yield/plant_T35_Krakow08	Regr_adj_Yd/plant_Zaj02	Grain_yd/plant_irrig_Kaz00	Yield/plant_M_Spain99	Yield/plant_sev_drought_Krakow07	Yield/plant_rainfed_Zaj01	Grain_wt/plant/GH/1994	Yield/plant_irrig_Zaj01	GrainYield/plant_N2_97	cYield 2011	cYield 2012	GrainYd/plant_(Ht_adj)_N3_97	Yield/plant_cont_Krakow10	Yield/plant_mod_drought_Krakow07	Grain_yd/plant_A_Kaz98	Yield/plant_rain_Zaj00	Consel 2003(50pl/row)	Vern_Total_yield/pl_Krakow06	Yield/plant_control_Krakow07	Grain_wt/plant/Mor_1994	75ppb_Mn_Grain_wt/pl_03	GrainYd/plant_(Hr_adj)_N1_98	NFA_Mn_Grain_wt/pl_03	Non-vern_Total_yield/pl_Krakow06	GrainYd/plant_(Ht_adj)_N2_98	Conselice_Yield/plant_04	Yield_g/plant_adj(2,80)_Idice03	Grain_yd/plant_B_Kaz98	Yield/plant_irrig_Zaj00	GrainYield/plant_N3_98	Idice_Mn_Yield/plant_13%_04	Total_yield/plant_75ppb_05	Grain_yd/plant_A_Kaz99	Total_yield/plant_NFA_05
Mean	0.10375	0.652566	0.665461	0.810144	0.914526	1.00081	1.29895	1.38747	1.39001	1.39573	1.42819	1.45558	1.46676	1.90537	1.92421	2.1556	2.20612	2.26689	2.414	2.42426	2.45568	2.47	2.53432	2.63168	2.7365	2.85196	2.98116	3.04234	3.18269	3.19613	3.22173	3.25	3.52191	3.59	3.61	3.76682	3.86095	3.97202	4.081	4.34189	4.42	4.437	4.57978	4.64389	4.71242	4.96578	5.53	6.37733	6.64989
3	0.036	0.4005	0.727667	0.489333	0.92		1.10467	1.41	0.954	1.351	0.49	1.53	1.601	2.17	1.59	2.55	2.873	1.46	1.38	2.1	2.78	2.15122	2.75	2.72	3.99867	3.323	2.17	3.04	4.1	3.76	2.795	3.0752	3.37	3.3	3.35217	2.76	5.35	3.33	2.49	5.99	5.58	5.99969	4.86	5.222	4.54	5.12926	5.05	5.52	6.93
4	0.107	0.636	0.434	0.913667	0.81		1.59167	1.19	0.891	1.861	1.86	1.4	1.78067	1.84	1.93	2.14	1.865		2.5	3	2.01		2.28	2.26	3.74933	3.34567	2.54	2.86	3.19	3.37	3.154	3.9092	3.02	3.1	2.7413	2.73	3.08	2.24	2.12	3.36	2.7	3.65657	1.77	5.892	6.75	3.76945	4.49		3.76
5	0.06	0.696	0.718667	0.560333	0.98	0.82	1.40633	1.41	2.079	1.464	1.27	1.45	1.562	1.73	1.62	3.21	2.585	1.92	1.19	2.87	2.1	3.20488	2.29	2.53	2.56833	3.288	2.77	3.49	4.95	7.34	3.27	3.393	6.43	5.25	3.7413	4.48	2.9	5.18	7.46	3.17	4.16	3.9775	6.14	4.23	3.89	7.31431	7.83	3.84	8.12
8		0.72	0.818333	0.629	1.09	0.59	1.857	1.45	1.635	1.745	0.9	1.65	1.38633	1.98	1.91	2.65	2.292		1.68	2.61	3.13	2.79512	3.08	2.48	3.53733	4.328	3.57	2.65	4.43	2.13	3.292	3.4404	4.17	3.71	3.42174	6.26	3.24	5.38	1.67	3.52	5.56	5.23404	9.22	4.41	4.54	5.8574	6.48	6.3	8.29
10	0.015	0.9375	0.86	0.0413333	1.02	0.31	1.45133	1.51	1.709	1.349	1.64	1.63	1.694	2.35	2.72	2.52	2.839	1.6	1.69	1.46	2.93	3.62195	3.16	3.6	2.874	2.21533	4.27	1.42	3.8	5.16	4.269	4.7688	2.37	3.96	3.76087	4.6	4.84	4.14	5.73	5.23	5.72	4.46791	6.6	6.965	5.06	4.60256	6.9	5.07	7.71
11	0.135	0.5825	0.403	0.654333	0.85	0.72	1.28433	1.48	1.28	1.235	1.36	1.55	1.42767	2.04	1.77	2.76	1.469	1.13	1.99	2.81	2.86	1.7	2.81	2.74	3.124	2.71533	3.77	2.5	3.95	3.94	2.631	4.7336	2.27	4.75	3.55217	3.73	4.03	3.72	5.12	4.09	3.66	3.54706	5.07	4.685	5.34	3.77902	4.54	5.19	5.64
12	0.147	0.34			0.95	0.62		1.52	1.52	1.31	1.36	1.53		1.92	1.82	1.6	2.803	2.2	4.27	1.78	2.12	2.52927	2.35	2.14			2.82	2.9	4.12	3.36	3.582	1.99	3.37	4.39	5.17174	5.11	3.86	5.67	3.28	4.14	5.64	5.48299	6.35	4.825	4.85	7.60159	6.12	6.56	6.5
13	0.316	1.026	0.673333	0.989667	0.89	1.3	1.97733	1.31	1.15	1.783	2.03	1.34	1.82933	1.96	2.23	1.56	3.47	3.53	0.94	2.75	2.54	3.28415	2.51	2.81	2.4	3.29833	5.16	3.05	3.62	2.83	3.183	3.0824	4.18	5.2	4.32391	5.26	3.72	4.77	2.75	4.64	3.16	5.22546	3.91	4.822	4.41	5.88681	6.13	8.35	7.04
14	0.043	0.7785	0.932667	0.721667	0.82	0.24	1.60067	1.17	1.305	0.892	1.84	1.3	1.72167	1.68	1.47	1.48	2.296	1.67	2.64	2.32	1.88	2.37195	1.96	3.18	2.969	3.30567	2.85	2.11	2.25	3.3	2.44	3.946	1.96	2.96	2.73043	4.09	4.77	3.59	5.26	4.78	3.56	5.50026	6.42	4.052	4.22	6.08465	5.19	6.3	5.98
15	0.113	0.5495	1.02067	1.67433	1.2	0.26	1.64533	1.58	1.705	1.31	1.39	1.66	1.6	2.16	1.46	2.25	2.054	1.11	3.3	2.35	2.83	1.86098	2.86	2.41	2.63867	2.608	2.7	2.45	2.94	2.83	3.55	3.7138	3.26	3.13	4.13913	3.55	4.93	5.3		4.54	4.58	5.0598	6.24	4.972	4.63	5.05517	6.74	4.82	7.32
16	0.088	0.33			0.93	0.84		1.33	1.215	1.684	1.7	1.18		1.72	1.92	2.39	1.997	2.37	1.41	2.71	2.86	1.83293	2.83	2.38			3.12	3.97	2.18	2.63	2.243	3.335	4.56	3.22	4.11304	5.23	1.87	5.52	3.55	2.81	2.22	3.48927	6.29	3.844	3.38	3.59811	6.01	3.99	8.17
17	0.033	0.5015	0.617	0.76	0.97	0.72	1.18967	1.44	1.39	1.092	1.37	1.4	1.75467	1.91	1.96	1.18	1.838	2.37	1.87	2.17	2.56	2.69634	2.56	2.47	2.25533	2.31233	3.35	2.82	3.13	2.73	2.167	3.7696	3.64	3.89	3.72609	5.42	4.38	4.98	3.53	6.59	3.94	4.28652	6.18	3.085	7.28	5.31836	5.29	5.56	6.94
18	0.207	0.786	0.397	0.853667	1.24	2.98	1.41867	1.62	2	1.501	1.16	1.71	1.821	2.16	2.68	1.93	3.069	1.98	1.68	2.15	3.4	2.84268	3.75	4.05	3.69733	3.94467	4.33	3.37	4.13	4.49	3.648	4.4896	4.58	4.91	3.7	4.09	4.2	2.73	4.47	5.18	4.1	5.75226	3.21	5.281	5.29	4.75296	4.4	6.43	6.82
19	0.09		0.621	1.62767	0.86	1.5	1.76433	1.33	1.019	1.287	1.34	1.43	1.36733	1.84	2.15	2.21	1.989	2.35	2.95	1.86	2.02		2.29	2.9	3.24467	3.12233	2.11	3.14	3.51	3.76	3.881	3.4462	2.88	3.27		3.88	2.94	5.18	3.03	5.75	5.18	4.28518	4.6	5.48	3.38	5.36436	5.98	5.62	7.38
20	0.124	0.6275	0.980667	1.48067	1.01	0.47	1.31267	1.58	1.077	1.155	1.93	1.56	1.81767	2.11	2.62	2.28	2.569	2.2	3.09	3.59	2.91	3.25	2.97	3.53	2.53233	2.31833	3.77	3.48	3.26	2.24	3.8	4.6176	4.97		3.98913	4.47	3.83	5.03		5.49	3.86	5.44696	2.62	4.676	6.52	5.9214	5.46	6.11	7.68
21	0	0.8675	0.822667	0.811	0.85	1.6	0.541667	1.4	1.83	1.653	1.53	1.53	1.46433	1.98	2.35	2.02	2.014	2.49	1.13	2.47	2.74	3.34146	2.8	3.01	2.053	2.99833	3.21	2.92	3.02	1.91	2.704	3.3638	5.48	2.49	4.38478	4.63	3.02	4.38	7.15	3.73	2.92	4.04284	5.46	4.223	3.85	5.21892	5.66	7.39	6.21
22	0.097	0.7875	1.04567	0.532667	1.17	1.29	1.37567	1.55	1.565		1.51	1.82	1.647	2.01	2.63	1.74	2.042	2.1	3.01	2.16	2.99	2.61829	2.93	3.07	3.88267	3.606	4.44	3.12	2.55	3.94	2.964	3.2696	3.04	4.09	3.80435	5.39	6.57	4.41	4.36	6.23	6.16	4.69	4.2	4.596	5.71	6.66022	6.02	7.11	7.01
23			1.01933	1.28133	0.95	1.13	1.465	1.53	1.56	1.828	1.37	1.53	1.59433	1.96	2.18	2.96	2.988	2.21	1.56	2.24	2.97	3.58293	3.24	3.89	3.50733	3.069	3.64	2.21	2.51	2.66	3.31	3.6556		2.44	3.31739	4.09	4.98	4.42	4.62	4.59	4.6	6.39327	7.94	3.81	6.86	4.17462	6.95	8.93	7.26
24	0.211	0.482	1.35667	0.843	1.1	1.11	1.81167	1.59	1.529	1.837	1.57	1.72	2.081	2.25	1.7	1.78	2.652	3.33	2.63	3.35	3.4	2.52317	3.4	2.95	3.68367	4.16067	3.68	3.16	4.47	4.28	3.458	4.7666	2.89	5.29	4.55	3.65	5.26	2.73	5.46	4.31	4.46	4.63479	5.04	5.401	6.47	4.85885	6.86	10.76	6.78
25	0.061	0.786	1.041	1.54933	0.9		1.15267	1.44	1.08	1.687	1.27	1.47	1.86	1.93	1.59	2.23	3.231		2.03	2.12	1.57		1.93	1.91	3.77533	3.764	1.75	3.69	2.95	1.15	3.065		2.91	3.64	1.31304	2.98	2.6	3.31	2.06	3.99	4.62	4.90278	1.15	4.869	4.65	4.45915	5.87		6.06
27	0.042		0.716	0.515667	1.03	0.52	1.126	1.39	0.989	1.387	1.57	1.26	1.06867	1.77	1.51	1.49	2.318	2.92	3.21	2.23	2.4	2.37927	2.54	2.03	2.42533	3.40533	2.45	2.62	3.61	2.92	2.621	2.8182	3.82	3.59	3.64565	4.03	3.99	3.89	3.42	3.53	3.62	3.48089	4.31	3.154	4.55	4.04054	5.62	7.38	6.27
28	0.24	0.688	0.786	1.24367	0.91	0.92	0.207667	1.43	1.211	0.616	1	1.42	1.765	1.82	1.63	1.34	2.005		5.51	2.29	2.55	1.87805	2.55	3.37	3.03133	1.53333	1.36	2.43	2.17	3.78	3.271	3.0662	2.73		5.84565	2.66	4.27	3.29	3.83	6.09	4.98	5.12523	4	5.305	6.11	6.10168	4.43	3.69	4.72
29	0.017	0.69	0.325	0.830333	0.97		1.10933	1.4	0.915	1.483	1.85	1.34	1.133	1.73	1.7	1.39	2.515		2.37	2.6	2.61		2.59	2.58	2.24	2.39033	3.96	2.13	3.48	3.94	3.256	3.369	3.29	4.17	3.73261	1.82	4.27	2.78		5.21	3.7	3.78851	3.68	4.751	6.48	3.74962	5.72		5.6
30	0.225	0.6095	0	0.508333	0.89	1.62	1.20033	1.41	1.809	1.377	1.6	1.31	1.05267	1.72	2.1	1.88	1.359	1.68	4.27	1.92	2.79	2.66341	2.74	2.52	1.794	2.60967	3	2.24	3.34	2.02	3.196	2.6772	2.79	3.08	2.92174		2.91		5.53	3.03	2.72	5.0432	5	3.563	6.17		5.33	6.33	7.79
31	0.034	0.592	0.358333	0.445	1.3		1.467	1.77	1.821	1.37	1.61	1.87	1.51733	2.42	1.83	2.11	2.475		1.95	2.78	3.27	2.46341	3.41	3.1	3.55433	2.58567	3.32	3.69	4.32	2.6	4.393	2.5646	4.53	4.7	2.94783	2.38	4.56	3.46	2.84	4.39	3.92	4.6969	2.32	5.68	5.22	5.03851	6.38		7.73
32	0.141	0.878	0.549667	0.728333	0.95	0.59	1.703	1.59	1.585	1.513	1.15	1.55	1.66667	2.09	1.97	1.97	5	1.86	3.12	2.93	2.4	1.84634	2.61	2.37	3.22033	2.66733	2.77	3.58	3.83	5.31	3.829	3.5294	4.92	2.94	4.5587	4.66	3.98	4.48	4.16	4.53	2.58	5.15443	4.82	4.963	4.27	5.16812	6.59	5.1	7.3
33	0.187	0.8945	0	0.333333	0.98	1.83	2.06167	1.61	1.445	1.493	1.91	1.67	1.502	2.36	2.55	2.55	1.976	4.04	3.31	2.86	2.46	2.77439	2.54	2.8	2.52367	3.07233	3.22	2.84	3.97	5.72	3.708	3.2324	1.89	4.16	4.15217	3.99	4.38	3.86	4.39	4.14	3.24	3.48416	5.57	4.323	3.97	5.42744	5.38	10.44	6.72
34	0.158	0.6125	0.559333	0.479667	0.84	0.67	0.642333	1.26	1.299	1.581	1.03	1.31	1.201	1.61	1.59	1.91	1.018	2.32	2.5	1.93	2.88	2.02195	2.89	1.9	2.69933	2.41033	2.58	2.67	2.38	1.84	2.355	2.7458	3.54	2.12	1.73913	2.28	2.72	2.94	5.31	3.57	3.24	3.75713	2.93	4.607	2.93	3.33536	4.97	4.13	4.7
35	0.028	0.5425	0	0.674	0.86	1.24	0.922	1.29		1.397	1.43	1.39	0.87	1.73	2.26	1.75	1.784	1.55	0.56	2.21	1.73	2.73902	1.93	1.85	2.078	2.055	2.31	3.52	2.77	3.1	2.469	3.3914	3.15	2.96	2.27391		3.06		4.52	3.37	4.84	4.89862	2.55	2.727	3.06	4.85257	4.99	5.68	5.46
36	0	0.587	0.297333	0.201	0.96	0.1	0.424667	1.34	1.345		1.26	1.51	0.871	1.72	2.04	1.9	1.792		1.11	2	3.01	1.20976	2.97	2.91	2.88633	2.598	2.98	2.52	2.58	3.48	2.374	3.428	3.39	2.79	3.80652	2.05	5.57	2.33	2.45	4.55	3.48	3.48354	4.94	3.803	4.46	3.83419	4.43	6.75	6.33
37	0.136	0.696	0.701333	0.566667	0.88	1.44	0.505	1.3	1.45	1.346	1.31	1.37	0.854667	1.71	1.84	1.76	1.508	1.94	0.93	2.09	2.66	1.4622	2.57	2.5	2.51467	2.81167	3.59	2.33	2.19	5.22	2.61	3.3076	3.36	2.5	2.64565	3.28	3.56	4.55	4.43	3.83	3.86	4.72012	10.84	4.409	4.34	4.59078	5.79	5.45	5.71
38	0.061	0.566	0.152667	0.399333	0.72	0.93	0.959667	1.06	1.33	1.4	1.36	1.24	1.25633	1.52	1.17	0.88	2.201	2.05	1.73	1.39	1.55	1.54634	1.49	1.66	1.992	2.447	2.13	2.6	1.58	4.88	1.843	3.0526	2.01	1.62	2.85435	1.59	2.51	1.08	2.94	1.86	4.68	3.2946	4.3	3.728	2.15	2.61553	1.74	4.49	3.96
39	0.093	0.693	1.36333	0.649333	0.84	0.86	1.37133	1.39	1.375	1.702	1.62	1.5	1.59567	1.84	2.31	1.47	1.412	2.41	2.91	2.76	2.18	3.05488	2.32	4.09	2.35867	2.867	2.87	3.32	3.27	3.09	3.88	2.7348	4.75	2.68	3.30652	5.62	3.73	4.69	3.71	4.03	4.42	3.95446	4.74	4.025	3.24	6.20766	6.04	6.22	7.87
40	0.143	0.47	0.662	0.478667	0.72	0.3	1.412	1.02	1.09	1.19	1.75	1.14	1.18567	1.41	1.89	1.34	1.51	1.01	1.82	2.16	1.59	2.67317	1.53	2.46	2.23	2.02567	3.4	2.41	3.27	2.46	1.8	2.7388	2.76	2.5	4.07826	2.44	2.39	2.52	2.68	2.58	2.92	3.95261	3.58	3.513	2.82	3.6314	3.55	3.54	5.26
41	0.069	0.325	0.602	0.0983333	0.86	0.12	1.39033	1.43	1.215	1.177	1.2	1.37	1.457	1.89	1.35	1.15	1.764	3.17	3.8	1.25	2.73		3.05	1.17	2.824	1.63033	1.6	2.68	2.47	4.24	2.73	2.5958	1.26	1.75	2.83043	0.99	5.2	1.33	0.56	7.02	4.06	2.5103	3.08	4.468	5.64	3.67989	4.96	3.86	3.6
42	0.008	0.335	0.847667	0	0.81		1.26567	1.17	0.901	1.349	0.85	1.27	1.73133	1.63	0.91		2.2		0.66	1.45	1.85		1.94	1.4	2.01833	2.25533	1.87	2.57		4.96	1.811	2.1464	3.01	3.51	3.39783	2.49	3.85	1.66	0.23	4.35	3.4	1.98437	1.15	3.418	3.04	3.16852	2.4		3.42
43	0.009	0.428	0.559667	0.951	0.85	1.32	1.70667	1.31		1.032	1.52	1.23	1.38867	1.65	1.77	1.26	2.154	3.07	2.59	2.71	2.01	2.14634	2.05	3.08	4.07967	3.64167	2.74	3.94	2.28	1.68	2.87	3.1676	5.3	4.77	3.22609	3.53	5.4	2.63	5.39	4.88	5.42	3.96248	6.41	4.307	4.66	4.02183	5.57	8.88	6.63
44	0.018	0.419			0.92	1.28		1.38	1.319	1.891	1.35	1.29		1.7	2.21	0.75	1.849	2.48	1.2	3.22	2.92	2.36585	3	2.72			3.57	3.59	3.89	4.24	3.074	3.6634	3.18	4.85	2.64783	3.87	5.26	3.3	7.13	4.1	5.4	5.56551	5.66	4.564	4.13	6.21697	4.15	5.47	5.62
45	0.1	0.7105	0.593	1.04967	0.82		1.65567	1.26	1.6	1.368	0.93	1.51	1.52833	1.8	1.77		1.139		2.79	2.19	1.76		1.92	2.44	2.57833	2.931	2.89	2.26	2.89	4.96	3.541	3.8778	5.2	3.48	4.55435	2.52	2.82	4.32	2.78	4.24	2.32	3.18281	3.92	4.636	3.16	5.49529	5.45		7.03
47	0.319	0.7645	0.728333	0.522333	0.81	1.12	1.185	1.28	1.606	0.835	1.22	1.26	1.41167	1.71	1.54	1.52	2.166	1.73	3.01	1.37	2.32		2.4	2.19	2.44833	2.52067	2.38	2.99	1.98	4.96	2.511	4.5988	1.59	1.93	2.73913	1.41	4.46	1.43	2.87	5.64		4.81501	2.49	3.371	4.92	3.9696	3.24	4.26	4.6
48	0.012	0.45	0.972333	0.592	0.85	0.63	1.392	1.46	1.709	1.203	1.3	1.63	1.49433	2.21	2.15	2.57	3.376	1.51	1.34	2.69	2.41	3.27439	2.66	2.99	3.42133	2.77267	3.18	3.55	4.27		3.979	3.4534	4.43	4.14	4.13478	5.07	5.32	3.23	6.08	5.19	5.02	5.83075	4.28	5.791	5.84	5.26098	6.86	8.82	7.33
49	0.064	0.4	1.122	0.380333	0.8	0.94	1.21567	1.15	1.049	0.622	1.08	1.42	1.64933	1.6	1.17	1.68	2.42	4.26	1.86	0.75	1.69	1.93415	1.64	1.69	2.63833	1.51867	1.93	2.7	1.65	5.22	1.969	3.2958	1.51	1.38	1.70652	1.76	4.02	2.39	1.98	3.13	3.6	3.00819	6.78	3.44	5.45	2.56613	3.02	7.27	4.46
50	0.062	0.4545	0.941667	0.409333	0.94	0.47	0.755	1.48	1.09	0.928	1.18	1.48	1.123	1.9	1.36	2.5	2.156	2.3	1.95	2.45	2.7	2.7	2.87	1.61	1.93	2.438	2.23	2.44	3.28	3.48	2.419	3.1034	3.57	3.23	4.41304	1.72	4.63	3.7	3.51	5.95	3.7	4.11155	6.49	3.292	4.74	4.82998	9.57	7.22	5.79
51	0.044	0.6965	1.34933	0.411	0.88	0.31	1.932	1.47	1.519	1.325	1.19	1.58	1.703	2.1	2.52	2.22	2.027	3.32	1.43	2.58	2.18	3.41585	2.24	3.19	2.47633	2.94933	3.53	3.95	3.54	3.1	2.656	2.7754	4.34	4.51	5.31522	3.87	3.61	5.12	4.62	4.09	4.96	3.79341	5.17	3.336	5.28	5.25232	5.89	7.78	9
52	0.068	0.7405	0.915667	0.914	0.93	2.46	1.271	1.5	1.575	1.462	1.68	1.42	1.67933	1.87	1.99	1.85	1.65	2.56	2.73	2.36	2.09	2.90732	2.09	3.01	2.42767	3.39333	3.1	2.8	3.34	2.02	3.934	3.3846	4.22	4.23	3.61739	4.52	3.44	4.03	4.16	4.08	4.7	4.68847	6.53	4.92	4.48	5.65324	6.89	6.17	7.11
55	0.063	0.6665	0.61	0.486667	0.75		1.50567	1.27	1.525	1.385	1.26	1.44	0.968	1.83	1.99	1.25	1.608		2.95	1.98	2.16		2.15	2.83	3.111	2.44333	2.94	1.96	3.59	3.11	2.873	2.9238	2.88	3.37	3.31739	3.02	3.42	3.93	1.58	4.66	3.64	2.91278	2.65	4.553	4.3	5.58329	3.99		6.07
57	0.152	0.3965	1.523	0.974	0.9	1.34	1.33633	1.39	1.014	1.074	1.87	1.45	1.65433	1.94	2.04	1.45	2.371	1.86	0.94	1.95	2.84	2.71341	3.03	2.24	2.28167	2.81333	1.91	2.84	3.89	2.97	3.129	3.7096	2.56	4.66	4.27391	4.65	3.51	4.69	4.61	3.3	4.32	4.48291	8.36	5.261	4.56	5.98191	7.17	5.97	7.95
58	0.253	0.809	0.655333	1.345	0.97	1.52	2.061	1.53	1.42	1.837	1.64	1.67	1.55733	2.22	2.16	2.89	2.756	3.47	3.99	2.97	2.73	2.40732	2.83	3.3	2.397	2.41967	3.51	3.71	3.82	2.95	4.338	3.6502	4.92	4.08	4.12609	4.66	4.61	5.69	3.72	4.11	6.58	4.29138	7.31	5.605	4.91	6.66661	7.34	9.9	8.81
59	0	0.3365	0.860333	0.756	0.64	0.48	0.599	0.93		1.472	1.21	0.95	1.46733	1.17	1.47	1.94	1.398	1.65	3.22	2.78	1.14		1.36	1.79	1.78933	2.55067	2.52	2.5	2.53	3.83	3.346	2.7812	1.9	2.89	2.82826		2.37		3.75	2.18	5.72	3.23484	3.83	4.975	2.64	5.50334	4.72	6.96	4.87
60	0.062	0.3985	0.717667	0.716333	0.94	2.13	1.71933	1.45	0.905	1.537	1.68	1.48	1.60567	2.04	2.63	2.28	1.998	1.75	3.83	2.6	2.48	2.70366	2.5	2.22	2.097	2.134	3.63	2.85	3.12	3.6	3.664	2.8068	5.28	2.72	5.06087		2.77		4.41	2.99	4.14	3.65329	6.04	4.628	2.54	5.12152	5.61	4.01	6.07
62	0.019	0.71	0	0.838333	1.02	1.19	0.971667	1.5	1.611	1.167	1.44	1.62	1.02167	2.07	1.8	2.08	1.796	2.44	1.62	2.64	2.4	2.64878	2.59	2.59	2.90567	3.37633	3.27	3.26	2.61	3.98	3.588	2.0826	3.05	3.18	3.55217	3.86	4.54	4.42	1.56	5.18	4.94	4.73979	10.03	5.947	4.42	5.30714	4.72	7.1	6.22
63		0.68	0.569667	1.29767	0.83	0.22	0.796333	1.35		1.345	1.56	1.45	2.07533	2.08	1.77	2.88	3.75	1.87	1.31	1.91	2.41	2.98659	2.75	2.7	2.559	2.74233	3.37	2.58	4.01	2.38	1.853	3.506	2.93	4.21	2.63478	4.22	3.3	4.09	4.48	3.64	4.36	4.65117	2.62	3.532	3.85	5.72352	5.97	5.08	6.96
64	0.115	0.7015	0.921333	1.07867	0.95	1.34	1.30733	1.37	0.985	1.658	1.61	1.33	1.51667	1.95	2.17	3.06	1.851	2.13	1.7	2.6	2.71	2.59756	2.73	2.86	3.31733	3.08867	3.25	2.71	2.4	2.09	3.508	3.7104	2.94	2.29	4.33478	4.52	4.28	3.72	4.24	4.15	4.78	4.49007	5.28	5.609	4.95	5.932	4.17	6.74	6.15
65	0.083	1.0225	0.817333	1.838	1.06	1.77	0.793667	1.58	1.475	1.379	1.98	1.41	1.50133	1.98	1.76	2.97	3.418	1.77	2.12	1.62	2.08	$0	2.18	2.91	1.92767	2.77267	3.73	3.32	3.74	4.05	4.003	2.9952	4.75	3.83	4.13261	4	3.54	5.61	4.51	4.89	3.86	4.39131	3.71	4.4	4.97	4.53938	6.21		7.25
66	0.077	0.6465	0.324333	0.66	0.91	2.23	1.76567	1.39		1.275	1.6	1.25	1.53067	1.96	2.39	2.7	2.766	2.41	1.74	2.03	3.17	2.51951	3.14	3.3	3.68667	4.413	3.3	3.68	3.31	4.68	4.064	2.2626	2.3	3.74	4.46087		3.82	5.55	3.24	5.22	4.7	3.47578	6.26	5	5.94	6.59862	6.48	6.32	8.99
67	0.348	0.775	0.506667	0.648	0.71	0.99	1.72967	1.24	1.075	1.405	1.07	1.36	1.529	1.66	2.11	2.76	1.448	2.17	3.43	2.81	2.37	2.81463	2.4	2.17	2.719	2.68	2.43	3.35	3.15	2.48	3.518	3.1558	4.38	3.18	3.36304	4.6	3.13	5.21	3.75	3.69	4.02	3.85249	2.95	4.442	4.6	4.15485	5.97	4.69	7.36
69	0.054	0.743	0.723333	1.96967	0.99		1.84367	1.54	1.219	1.321	0.96	1.44	1.59233	2.03	2	1.64	3.569		1.58	2.86	2.66	0	2.62	3.29	3.54	3.10167	2.46	2.6	2.72	3.34	3.028	3.4966	2.82	3.85	4.0587	3.7	3.9	4.9	3.08	5.43	4.08	5.66044	1.6	3.811	5.7	5.11739	3.21		7
70	0.221	0.5635	0.662667	0.933	0.83	0.68	1.28667	1.29	1.095	2.058	2.06	1.12	1.34933	1.64	2.16	2.12	2.228	2.47	1.85	2.57	1.79	2.38902	2.03	3.18	1.892	2.70367	3.15	3.25	2.45	2.41	3.74	3.629	3.45	3.02	2.51522	4.65	1.89	5.27	3.69	2.3	3.3	3.62998	5.98	4.877	3.52	4.17901	3.9	4.79	6.24
71	0.102	0.9655	0.681667	1.70733	0.81	0.34	1.69767	1.31	1.58	1.997	1.22	1.5	1.985	1.85	2.06	2.94	1.857	2.05	2.96	1.93	2.19	2.66098	2.27	2.19	2.54033	3.284	4	4.11	4.27	2.87	3.537	2.8766	5.17	4.81	5.94783	4.84	2.82	4.33		4.39	3.54	5.08724	5.8	4.357	4.02	5.66927	5.67	9.25	7.05
72	0.095	0.452	0.414667	0.792333	0.74	1.22	1.09733	1.12	1.386	1.727	1.37	1.03	1.27867	1.43	1.69	2.38	1.82	1.43	1.79	1.79	2.1	1.9	2.08	1.98	2.105	2.768	2.35	3.16	1.98	1.48	2.53	3.7254	4.67	2.43	3.41522	4.34	2.33	4.35	5.88	2.24	4.34	3.96407	3.8	3.889	2.23	3.08222	4.24	6.17	6.23
80	0.143	0.5805	0.473667	0.45	0.89		1.02567	1.34	1.446	1.063	1.5	1.47	1.232	1.84	1.63	2.27	2.28		0.92	2.45	2.32	1.89024	2.26	2.95	2.92167	2.74567	2.29	3.45	2.05		3.129	2.308	2.79	3.18	3.12174	2.98	4.4	2.99	3.23	4.03	3.26			5.483	4.46	2.97533	4.21		5.56
86	0.11	0.5515	0.272667	0.771667	1.23	1.5	1.04133	1.54	1.46	1.431	0.86	1.66	1.44933	2.03	1.76	2.59	1.723	2.14	2.23	2.37	2.85	2.26951	2.81	2.93	2.76333	3.20733	3.21	2.38	2.07	2.5	2.36	2.5196	2.4	3.87	2.76304	3.41	3.04	4.19	3.95	3.3	4.54	4.46722	2.93	3.706	3.4	5.16634	4.43	5.93	6.16
87	0.075	0.659	0.927333	0.82	1.06	0.52	1.245	1.55	1.7	1.588	1.5	1.77	0.948	2.28	1.76	2.18	2.887	1.61	2.6	2.82	3.06	1.91707	2.8	3.29	3.62167	3.01867	3.06	3.16	2.98	1.27	4.53	3.7874	1.74	3.28	4.75652	3.13	3.45	3.95	7.31	3.5	4	4.37787	5.67	5.368	4.16	4.82717	5.23	6.23	7.1
88	0.055	0.368	0.645333	0.776	1	2.42	0.524667	1.49	1.59	1.29	1.39	1.49	1.37867	1.99	2.29	2.14	2.105	2.08	1.42	2.59	2.87	3.32073	2.88	2.94	2.43867	2.36667	2.51	3.38	3.12	1.26	3.238	2.5024	3.8	3.52	3.41522	3.63	3.27	5.41	6.41	3.88	4.78	4.84951	3.71	4.849	4.76	6.72609	6.74	7.14	6.64
90	0.284	1	0.969	0.107667	1.02	0.73	1.80433	1.6	2.42	1.104	1.33	1.76	1.95133	2.29	2.59	2.48	2.99	4.29	2.56	2.46	2.82	3.45366	2.89	3.23	2.80267	3.63567	4.32	3.81	4.19	1.71	5.356	3.9534	2.51	3.6	4.3087	3.87	4.56	4.8	4.91	4.66	4.48	5.74298	5.93	5.733	5	6.02485	7.95	8.47	11.03
91	0.072	0.612	0.822667	0.123667	1.03	0.25	1.18167	1.62	1.7	1.189	1.65	1.57	1.58367	2.17	2.2	1.67	2.639	3.89	1.69	2.07	3.72	1.51829	3.99	2.64	2.79033	2.77133	3.45	3.46	3.11	3.19	4.685	4.1784	5.84	4.17	2.11739		4.62		6.93	4.5	3.84	5.10172	4.31	5.134	4.57	3.9102	7.49	6.06	7.9
92	0.03	0.4645	0.325	0.217667	0.88	1.76	0.803333	1.35	1.399	1.584	1.67	1.23	0.857667	1.72	1.83	1.27	1.418	1.95	2.11	2.92	2.46	1.83415	2.4	2.38	2.10333	2.483	3.48	1.99	2.82	2.55	3.082	3.1038	3.84	3.34	2.1413	3.31	3.93	2.84	4.69	3.22	4.46	3.66045	1.56	5.156	5.2	4.88765	6.05	6.63	5.98
93	0.071	0.4825	0.634667	0.529333	1.16	0.65	1.402	1.62	1.26	1.377	1.49	1.76	1.21567	2.36	2.4	2.08	3.015	2.35	2	2.31	2.93	3.73415	2.85	2.87	2.15867	3.59233	3.71	2.22	3.53	3.33	4.643	3.5184	4.22	3.54	4.0087	3.9	2.99	4.71	4.9	3.31	3.84	4.03763	4.52	5.608	4.91	4.67829	5.94	9.02	6.72
94	0.033	0.6235	0.106667	0.0823333	0.76	0.45	0.386667	1.28	1.109	0.995	0.66	1.34	0.899667	1.78	1.69	1.71	0.731	1.02	3.42	1.76	2.17	2.58293	2.28	2.17	2.14333	2.64467	1.64	2.81	2.61	1.59	3.359	2.4722	3.55	3.53	3.48696	2.52	3.21	3.5	4.79	3.1	4.92	3.14145	5.27	4.409	5.09	5.72642	3.07	7.01	5.01
96	0.12	0.794			0.82	3.14		1.2		1.492	1.74	1.41		1.88	2.18	2.89	2.055	3.18	4.58	2.46	1.91	2.58537	2.01	2.65			4.23	2.45	2	2.14		2.9606	4.06	3.79	4.23478		4.03		5.93	3.58	4.68	4.85012	3.47	4.657	4.02	4.60331	5.67	8.13	6.96
97	0.021	0.7675	0.482333	0.369333	0.69	1.28	1.60967	1	1.365	1.413	1.13	1.38	1.30033	1.65	2.12	2.67	1.207	1.99	1.87	2.65	1.93	2.9	2	2.6	2.41767	3.24533	2.3	3.74	3.12	3.19	2.444	2.8756	3.36	3.99	1.49565	4.77	3.65	5.34	4.92	3.44	2.82	3.55923	8.2	3.797	3.85	6.2858	6.59	2.9	6.67
98	0.411	1.0495	0.609333	2.35733	0.79		1.95433	1.18		1.456	1.47	1.48	2.134	1.9	1.3	2.91	2.014		3.22	2.99	1.86		1.98	1.5	2.89967	2.93367	2.3	4.24	3.85	2.55	3.086	2.5708	3.31	4.6	3.6413	3.24	2.88	3.57	1.21	4.2	2.9	5.09316	$0.55	4.577	4.97	5.49017	6.95		6.5
99	0.013	0.516	0.493	0.440333	0.8	0.49	1.18633	1.18	1.535	1.232	1.42	1.41	1.36833	1.75	1.69	2.71	1.526	0.81	1.8	2.37	2.24	3.36585	2.26	2.25	3.366	2.51233	2.23	3.39	3.5	3.33	3.052		4.78	3.96	3.33913	4.41	2.46	4.16	5.44	3.65	3.08	4.00669	4.46	5.085	3.13	4.52443	6.69	4.58	7.5
102	0.1	0.9335	0.259667	0.834667	0.95		1.34567	1.46	1.521	1.244	1.24	1.67	1.527	2.23	2.16	3.15	2.836		3.26	2.18	2.15		2.24	3.24	3.128	2.08967	3.04	4.04	4.03	3.33	4.038	3.439	2.51	3.57	4.62174	3.18	4.77	4.24	2.94	4.02	6.42	4.96993	2.39	5.78	5.41	5.66941	5.07		7.62
104	0.057		0.747	0.381	1.02		0.55	1.61	0.971	0.798	1.71	1.52	1.67267	2.07	2.44	2.42	2.6	1.16	3.15	2.97	3.44	1.85122	3.54	2.93	2.824	2.499	2.77	2.59	3.09	1.15	3.954	1.9632	4.53	3.67	3.12391	4.22	4.37	3.55	5.28	4.6	3.42	4.51962	2.44	5.58	5.34	4.7231	6.38	2.8	8.8
105	0.007	0.545	0.684	0.896333	0.77		1.51633	1.07	1.339	1.394	1.59	1.06	1.23433	1.55	1.92	2.19	1.957	1.43	2.04	1.56	2.27	1.66707	2.2	3.12	2.99	2.51933	3.75	3.97	2.86	3.54	3.011	3.2616	2.98	1.87	2.92826	3.44	3.74	4.02	4.59	4.48	3.96	5.1125	4.11	4.87	5.98	4.41911	5.61	7.63	7.09
114	0.176	1.024	0.239667	0.455	1.07		0.737	1.56	1.56		1.82	1.5	0.718	2.03	2.16	2.37	2.122		2.62	2.72	3.32		3.34	2.63	2.95867	3.19333	3.12	3.39	3.92	4.63	3.402	3.6192	2.48	3.92	4.41087	4.31	5.76	4.01	3.52	7.85	4.64	5.54505	1.82	5.411	4.08	4.41642	6.22		6.5
115	0.018	0.567		2.68533	1		0.664	1.55	1.066	1.962	1.79	1.69		2.3	1.12		2.505		2.09	3.19	2.51		2.48	1.28	3.75167	2.697	1.74	3.71	3.79	3.54	2.917	2.681	3.31	3.95	2.39348	3.99	3.09	3.38		3.26	4.62	4.12311	1.85	6.6	3.94	3.19069	4.86		5.53
124	0.01	0.729	0.737	0.735	0.81	0.95	0.861333	1.17	1.275	1.663	1.36	1.15	0.87	1.72	1.64	3.25	2.281	3.18	0.61	3.53	2.33	1.9378	2.31	3.09	3.24733	3.277	3.4	2.66	3.26	2.88	3.415	1.942	4.13	4.49	2.66522	2.32	4.98	3.39	5.93	4.24	3.3	4.44024	3.7	6.335	5.04	3.30927	5.46	2.57	5.45
127	0.102	0.4165	0.763	0.447333	0.86	1.14	1.60467	1.42	1.325		1.34	1.29	0.856667	1.76	1.71	2.15	3.29	2.29	1.48	2.72	2.31	1.98171	2.31	2.86	1.68733	2.71533	2.39	2.19	2.63	1.44	3.338	2.781	4.42	4.28	2.7413	3.64	2.57	3.94	3.5	2.26	4.62	4.5431	4.17	4.605	5.82	4.25953	3.79	7.11	4.91
128	0.133	0.688	0.606333	0.335667	0.72	0.31	1.17	1.03	1.015	1.277	1.59	1.24	1.16533	1.54	1.88	2.95	2	2.17	3.14	2.69	1.58	3.01585	1.83	2.6	2.227	2.902	3.2	3.02	2.9	1.75	3.198	2.718	3.64	3.98	3.39348	5.18	3.16	5.16	4.17	4.14	4.18	3.55376	5.54	4.148	5.24	5.2475	6.18	8.84	7.3
143	0.053	0.456	1.08133	1.65333	0.84		1.80533	1.37	1.2	1.332	1.77	1.53	1.86133	1.91	1.77	3.61	2.246		1.36	3.62	1.67		1.75	2.62	3.44867	1.587	2.43	4.05	4.91	2.45	3.288	3.9504	4.66	4.83	3.86957	4.56	5.96	6.33	3.18	6.33	3.44	5.37124	2.05	4.487	5.69	5.58945	4.97		6.65
144	0.073	0.4265	0.588333	0	0.81	0.2	0.137	1.2	1.45	1.04	0.47	1.37	1.30833	1.65	1.51	1.33	2.357	1.31	1.03	1.31	2.17		2.13	1.66	2.942	1.65533	1.47	2.94	2.29	3.2	1.77	2.5386	1.17		2.75652	1.74	3.31	1.3	$0.6	4.52	3.44	4.13712		3.09	2.7	4.37752	2.95		4.88
146	0.053	0.678	0.748333	1.05733	0.98		0.996333	1.56	1.829	1.719	1.27	1.51	1.772	2.05	1.6	3.09			7.97	2.54	2.18		2.26	2.11	2.83133	2.58733	2.4	4.05	2.97	3.14	3.666	4.2024	3.39	3.92	5.11739	3.92	5.13	3.61	2.18	8.65	4.46	5.04423	1.8	4.831	7.48	5.94315	5.33		6.67
Mean	0.0990741	0.635944	0.668308	0.779521	0.914762	1.02136	1.26119	1.38333	1.38396	1.39189	1.41821	1.44631	1.4513	1.89893	1.91643	2.14938	2.24249	2.22	2.33095	2.38488	2.4481	2.48228	2.52083	2.62798	2.77766	2.81779	2.96714	3.02012	3.18795	3.20622	3.20705	3.25175	3.50976	3.57642	3.56383	3.71013	3.85524	3.96372	4.05179	4.29286	4.21766	4.39913	4.62877	4.63832	4.64429	4.94273	5.47774	6.28075	6.57095
Lowest 10 CSDH lines
Mean 2007-9	ELWLW 0-3h
1	0.23	0.4505	0.521333	0.617	0.8	1.21	1.835	1.14	0.87	1.568	1.38	1.48	1.28067	1.63	2.15	2.74	1.796	3.05	4.03	3.51	1.96	1.96951	2.13	2.37	2.53367	3.38633	2.69	2.63	2.1	3.03	2.875	3.58	3.3	3.32	2.88696	3.73	1.93	3.71	4.16	3.81	3.7	4.3129	2.18	3.231	4.68	4.58993	3.81	8.23	5.83
2	0.272	0.7545	0.591	1.577	0.87	0.28	1.96833	1.38	1.091	1.552	2.38	1.58	1.97033	1.93	1.64	2.04	1.43	2.6	4.97	2.62	2.19	2.51829	2.39	2.47	1.62667	2.83067	2.92	3.29	2.68	4.48	3.482	3.0118	2.82	3.84	3.5413	3.33	2.85	2.62	3.9	4.02	4.86		2.92	4.965	4.8	4.87399	6.39	9.2	7.22
7	0.121	0.841	0.804	0.456333	1.14		1.61433	1.55	1.93	1.582	1.36	1.63	1.67567	1.97	1.67	2.1	1.75		1.1	2.66	2.84		2.96	1.64	2.44467	2.23333	2.81	3.66	3.62	2.84	3.82	3.5108	2.22	2.91	4.57826	4.92	4.51	3.45	4.5	5.44	7.1	4.74423	3.4	4.548	3.75	5.64566	5.44		6.34
9	0.032	0.8725	0.835	0.454	1.06	0.46	1.143	1.7	1.686	1.535	1.7	1.76	1.704	2.46	1.83	2.3	2.351	3.64	2.61	2.22	3.93	1.87561	3.85	2.16	3.006	3.17767	2.64	2.27	2.35	1.18	2.96	4.0558	3.03	3.8	3.41957	4.73	4.78	5	5.74	4.92	4.52	4.70521	5.88	4.818	7.49	4.48623	6.75	6.26	6.2
26	0.177	0.934	0.661667	3.37167	0.85		2.27233	1.36		2.004	1.97	1.58	2.04067	2.03	1.61	1.99	1.431		5.49	3.05	2.04		2.07	2.24	2.864	3.90033	2.51	4.44	2.93	2.3	2.354	2.7438	3.32	2.98	4.88478	2.66	5.31	2.79	3.88	4.98	3.3	3.30443	1.8	3.395	7.12	5.89266	4.98		7.45
46	0.113	0.9125	0.806667	0.747667	0.89	0.53	1.64967	1.42	1.68	1.325	1.19	1.36	1.46667	1.8	2.62	2.45	1.567	2.51	2.13	3.13	1.69	3.45976	1.74	3.28	2.393	3.49967	3.56	2.93	3.88	1.68	3.526	2.6952	4.62	3.61	3.6587	6.05	3.26	5.42	4.8	4.07	5.12	3.94689	8.07	4.547	4.52	5.60503	6.76	8.15	8.59
53	0.05	0.444	0.419667	1.39767	0.85	1.05	1.60633	1.42	1.56		1.01	1.4	1.47733	1.94	1.83	2.82	3.13	1.95	2.05	2.82	2.53	3.15122	2.81	3.07	2.427	2.68733	2.58	3.96	3.75	3.56	2.871	3.4882	4.61	4.74	3.98696	5.21	4.04	5.4	6.38	5.58	4.74	5.3819	4.17	5.283	5.02	4.49863	6.45	3.88	9.17
54	0.193	0.861	0.738333	0.204	1.06	0.74	1.86233	1.61	1.819	1.522	1.23	1.62	1.63433	2.19	2.01	1.72	2.923	2.99	1.06	2.39	2.98		3.21	3.42	2.79933	2.89167	3.08	3.01	3.71	2.9	3.837	3.4456	3.12	4.73	3.29565	2.52	4.32	3.24	5.02	4.93	4.3	4.30286	3.35	5.501	5.12	6.3555	5.92	6.15	8.04
56	0.134	0.926	0.718333	0.697667	0.77	1.12	1.019	1.32	1.35	0.846	1.28	1.55	1.613	1.94	2.99	2.24	1.282	2.01	2.84	3.31	2.22	3.44024	2.31	2.87	2.43467	3.489	4.49	3.29	3.86	3.86	3.536	3.0094	3.35	4.38	5.11304	4.66	4.2	5.06	4.41	5.44	4.1	5.63866	7.2	5.311	4.69	6.49488	7	9.52	7.9
61	0.135	0.709	0.333667	1.02833	0.72	1.26	1.04	1.26	0.99	0.935	1.62	1.4	1.026	1.81	1.79	1.66	1.287	2.48	2.38	1.84	2.99	2.45976	2.99	3.24	1.54333	3.15767	3.01	2.81	2.51	3.29		2.1888	6.07	2.69	3.65652	4.04	3.12	3.39	3.78	3.8	5.02	5.20903	4.7		5.23	4.75809	6.06	6.1	6.28
Mean 10 ELWL	0.1457	0.7705	0.642967	1.05513	0.901	0.83125	1.60103	1.416	1.44178	1.42989	1.512	1.536	1.58887	1.97	2.014	2.206	1.8947	2.65375	2.866	2.755	2.537	2.69634	2.646	2.676	2.40723	3.12537	3.029	3.229	3.139	2.912	3.25122	3.17294	3.646	3.7	3.90217	4.185	3.832	4.008	4.657	4.699	4.676	4.61623	4.367	4.62211	5.242	5.32006	5.956	7.18625	7.302
Ratio !0/rest	1.47062	1.21159	0.962081	1.35357	0.984956	0.813863	1.26946	1.02361	1.04178	1.0273	1.06613	1.06201	1.09479	1.03743	1.05091	1.02634	0.844908	1.19538	1.22954	1.15519	1.03632	1.08624	1.04965	1.01827	0.86664	1.10916	1.02085	1.06916	0.984645	0.908235	1.01377	0.975765	1.03882	1.03455	1.09494	1.12799	0.993972	1.01117	1.14937	1.09461	1.10867	1.04935	0.943448	0.996505	1.1287	1.07634	1.08731	1.14417	1.11125
Overall advantage	1.074
11/53 <1.0
Highest 10 CSDH lines
17	0.033	0.5015	0.617	0.76	0.97	0.72	1.18967	1.44	1.39	1.092	1.37	1.4	1.75467	1.91	1.96	1.18	1.838	2.37	1.87	2.17	2.56	2.69634	2.56	2.47	2.25533	2.31233	3.35	2.82	3.13	2.73	2.167	3.7696	3.64	3.89	3.72609	5.42	4.38	4.98	3.53	6.59	3.94	4.28652	6.18	3.085	7.28	5.31836	5.29	5.56	6.94
21	0	0.8675	0.822667	0.811	0.85	1.6	0.541667	1.4	1.83	1.653	1.53	1.53	1.46433	1.98	2.35	2.02	2.014	2.49	1.13	2.47	2.74	3.34146	2.8	3.01	2.053	2.99833	3.21	2.92	3.02	1.91	2.704	3.3638	5.48	2.49	4.38478	4.63	3.02	4.38	7.15	3.73	2.92	4.04284	5.46	4.223	3.85	5.21892	5.66	7.39	6.21
38	0.061	0.566	0.152667	0.399333	0.72	0.93	0.959667	1.06	1.33	1.4	1.36	1.24	1.25633	1.52	1.17	0.88	2.201	2.05	1.73	1.39	1.55	1.54634	1.49	1.66	1.992	2.447	2.13	2.6	1.58	4.88	1.843	3.0526	2.01	1.62	2.85435	1.59	2.51	1.08	2.94	1.86	4.68	3.2946	4.3	3.728	2.15	2.61553	1.74	4.49	3.96
42	0.008	0.335	0.847667	0	0.81		1.26567	1.17	0.901	1.349	0.85	1.27	1.73133	1.63	0.91		2.2		0.66	1.45	1.85		1.94	1.4	2.01833	2.25533	1.87	2.57		4.96	1.811	2.1464	3.01	3.51	3.39783	2.49	3.85	1.66	0.23	4.35	3.4	1.98437	1.15	3.418	3.04	3.16852	2.4		3.42
70	0.221	0.5635	0.662667	0.933	0.83	0.68	1.28667	1.29	1.095	2.058	2.06	1.12	1.34933	1.64	2.16	2.12	2.228	2.47	1.85	2.57	1.79	2.38902	2.03	3.18	1.892	2.70367	3.15	3.25	2.45	2.41	3.74	3.629	3.45	3.02	2.51522	4.65	1.89	5.27	3.69	2.3	3.3	3.62998	5.98	4.877	3.52	4.17901	3.9	4.79	6.24
80	0.143	0.5805	0.473667	0.45	0.89		1.02567	1.34	1.446	1.063	1.5	1.47	1.232	1.84	1.63	2.27	2.28		0.92	2.45	2.32	1.89024	2.26	2.95	2.92167	2.74567	2.29	3.45	2.05		3.129	2.308	2.79	3.18	3.12174	2.98	4.4	2.99	3.23	4.03	3.26			5.483	4.46	2.97533	4.21		5.56
88	0.055	0.368	0.645333	0.776	1	2.42	0.524667	1.49	1.59	1.29	1.39	1.49	1.37867	1.99	2.29	2.14	2.105	2.08	1.42	2.59	2.87	3.32073	2.88	2.94	2.43867	2.36667	2.51	3.38	3.12	1.26	3.238	2.5024	3.8	3.52	3.41522	3.63	3.27	5.41	6.41	3.88	4.78	4.84951	3.71	4.849	4.76	6.72609	6.74	7.14	6.64
104	0.057		0.747	0.381	1.02		0.55	1.61	0.971	0.798	1.71	1.52	1.67267	2.07	2.44	2.42	2.6	1.16	3.15	2.97	3.44	1.85122	3.54	2.93	2.824	2.499	2.77	2.59	3.09	1.15	3.954	1.9632	4.53	3.67	3.12391	4.22	4.37	3.55	5.28	4.6	3.42	4.51962	2.44	5.58	5.34	4.7231	6.38	2.8	8.8
105	0.007	0.545	0.684	0.896333	0.77		1.51633	1.07	1.339	1.394	1.59	1.06	1.23433	1.55	1.92	2.19	1.957	1.43	2.04	1.56	2.27	1.66707	2.2	3.12	2.99	2.51933	3.75	3.97	2.86	3.54	3.011	3.2616	2.98	1.87	2.92826	3.44	3.74	4.02	4.59	4.48	3.96	5.1125	4.11	4.87	5.98	4.41911	5.61	7.63	7.09
144	0.073	0.4265	0.588333	0	0.81	0.2	0.137	1.2	1.45	1.04	0.47	1.37	1.30833	1.65	1.51	1.33	2.357	1.31	1.03	1.31	2.17		2.13	1.66	2.942	1.65533	1.47	2.94	2.29	3.2	1.77	2.5386	1.17		2.75652	1.74	3.31	1.3	$0.6	4.52	3.44	4.13712		3.09	2.7	4.37752	2.95		4.88
Mean 10 ELWL	0.0658	0.528167	0.6241	0.540667	0.867	1.09167	0.8997	1.307	1.3342	1.3137	1.383	1.347	1.4382	1.778	1.834	1.83889	2.178	1.92	1.58	2.093	2.356	2.3378	2.383	2.532	2.4327	2.45027	2.65	3.049	2.62111	2.89333	2.7367	2.85352	3.286	2.97444	3.22239	3.479	3.474	3.464	4.11667	4.034	3.71	3.98412	4.16625	4.3203	4.308	4.37215	4.488	5.68571	5.974
Ratio !0/lowest 10	2.21429	1.45882	1.03023	1.95154	1.03922	0.76145	1.77952	1.0834	1.08063	1.08844	1.09328	1.14031	1.10476	1.10799	1.09815	1.19964	0.869927	1.38216	1.81392	1.31629	1.07683	1.15336	1.11037	1.05687	0.989532	1.27552	1.14302	1.05904	1.19758	1.00645	1.18801	1.11194	1.10956	1.24393	1.21096	1.20293	1.10305	1.15704	1.13126	1.16485	1.26038	1.15866	1.04818	1.06986	1.21681	1.21681	1.32709	1.26391	1.2223
																																								M103+N103+O103+Q103+V103+X103+Z103+AA103+AB103+AC103+AD103+AI103+AK103+AM103+AS103+AT103+AX103+BA103+BB103
																															1.536	1.58887	1.97	2.206	2.537	2.646	2.40723	3.12537	3.029	3.229	3.139	3.7	4.185	4.008	4.62211	5.242	7.302	4.61794	4.34339
																															1.06201	1.09479	1.03743	1.02634	1.03632	1.04965	0.86664	1.10916	1.02085	1.06916	0.984645	1.03455	1.12799	1.01117	0.996505	1.1287	1.11125	1.08976	1.15133
																															1.347	1.4382	1.778	1.83889	2.356	2.383	2.4327	2.45027	2.65	3.049	2.62111	2.97444	3.479	3.464	4.3203	4.308	5.974	3.9188	3.39974
																															1.14031	1.10476	1.10799	1.19964	1.07683	1.11037	0.989532	1.27552	1.14302	1.05904	1.19758	1.24393	1.20293	1.15704	1.06986	1.21681	1.2223	1.17841	1.27757
																																								D121+E121+F121+G121+H121+I121+K121+L121+U121+AD121+AE121+AF121
																																						0.642967	1.05513	0.901		1.60103	1.416	1.42989	1.512	2.755	3.139	2.912	3.25122
																																						0.962081	1.35357	0.984956		1.26946	1.02361	1.0273	1.06613	1.15519	0.984645	0.908235	1.01377
																																						0.617	0.76	0.97	0.72	1.18967	1.44	1.092	1.37	2.17	3.13	2.73	2.167
																																						0.822667	0.811	0.85	1.6	0.541667	1.4	1.653	1.53	2.47	3.02	1.91	2.704
																																						0.152667	0.399333	0.72	0.93	0.959667	1.06	1.4	1.36	1.39	1.58	4.88	1.843
																																						0.847667	0	0.81		1.26567	1.17	1.349	0.85	1.45		4.96	1.811
																																						0.662667	0.933	0.83	0.68	1.28667	1.29	2.058	2.06	2.57	2.45	2.41	3.74
																																						0.473667	0.45	0.89		1.02567	1.34	1.063	1.5	2.45	2.05		3.129
																																						0.645333	0.776	1	2.42	0.524667	1.49	1.29	1.39	2.59	3.12	1.26	3.238
																																						0.747	0.381	1.02		0.55	1.61	0.798	1.71	2.97	3.09	1.15	3.954
																																						0.684	0.896333	0.77		1.51633	1.07	1.394	1.59	1.56	2.86	3.54	3.011
																																						0.588333	0	0.81	0.2	0.137	1.2	1.04	0.47	1.31	2.29	3.2	1.77
																																						0.6241	0.540667	0.867		0.8997	1.307	1.3137	1.383	2.093	2.62111	2.89333	2.7367
																																						1.03023	1.95154	1.03922		1.77952	1.0834	1.08844	1.09328	1.31629	1.19758	1.00645	1.18801
[truncated: 68 more columns]

## Sheet: ELWLW 0-3h 2007+F-W plots
			New	New			New						New												New	New
CSDH	Yield/plant_S_Spain99	GrWt/plant/NFF_1994	Yield	dYield 2012	Yield/pl_droughted_Zaj06	Grain_wt/plant_rain_Kaz00adj	dYield 2011	Yield/pl_mn_Droughted_Zaj05	Diff_ear_dwt_SUSTExp2	moddrought_Yield/plant_T14_Krakow08	Yield/plant_sev_dr_Krakow10	Yield/pl_control_Zaj06	cYield 2013	Yield/pl_mn_Rainfed_Zaj05	GrainYd/plant_(Ht_adj)_N1_97	cont_Yield/plant_T35_Krakow08	Regr_adj_Yd/plant_Zaj02	Grain_yd/plant_irrig_Kaz00	Yield/plant_M_Spain99	Yield/plant_sev_drought_Krakow07	Yield/plant_rainfed_Zaj01	Grain_wt/plant/GH/1994	Yield/plant_irrig_Zaj01	GrainYield/plant_N2_97	cYield 2011	cYield 2012	GrainYd/plant_(Ht_adj)_N3_97	Yield/plant_cont_Krakow10	Yield/plant_mod_drought_Krakow07	Grain_yd/plant_A_Kaz98	Yield/plant_rain_Zaj00	Consel 2003(50pl/row)	Vern_Total_yield/pl_Krakow06	Yield/plant_control_Krakow07	Grain_wt/plant/Mor_1994	75ppb_Mn_Grain_wt/pl_03	GrainYd/plant_(Hr_adj)_N1_98	NFA_Mn_Grain_wt/pl_03	Non-vern_Total_yield/pl_Krakow06	GrainYd/plant_(Ht_adj)_N2_98	Conselice_Yield/plant_04	Yield_g/plant_adj(2,80)_Idice03	Grain_yd/plant_B_Kaz98	Yield/plant_irrig_Zaj00	GrainYield/plant_N3_98	Idice_Mn_Yield/plant_13%_04	Total_yield/plant_75ppb_05	Grain_yd/plant_A_Kaz99	Total_yield/plant_NFA_05
Mean	0.10375	0.652566	0.665461	0.810144	0.914526	1.00081	1.29895	1.38747	1.39001	1.39573	1.42819	1.45558	1.46676	1.90537	1.92421	2.1556	2.20612	2.26689	2.414	2.42426	2.45568	2.47	2.53432	2.63168	2.7365	2.85196	2.98116	3.04234	3.18269	3.19613	3.22173	3.25	3.52191	3.59	3.61	3.76682	3.86095	3.97202	4.081	4.34189	4.42	4.437	4.57978	4.64389	4.71242	4.96578	5.53	6.37733	6.64989
3	0.036	0.4005	0.727667	0.489333	0.92		1.10467	1.41	0.954	1.351	0.49	1.53	1.601	2.17	1.59	2.55	2.873	1.46	1.38	2.1	2.78	2.15122	2.75	2.72	3.99867	3.323	2.17	3.04	4.1	3.76	2.795	3.0752	3.37	3.3	3.35217	2.76	5.35	3.33	2.49	5.99	5.58	5.99969	4.86	5.222	4.54	5.12926	5.05	5.52	6.93
8		0.72	0.818333	0.629	1.09	0.59	1.857	1.45	1.635	1.745	0.9	1.65	1.38633	1.98	1.91	2.65	2.292		1.68	2.61	3.13	2.79512	3.08	2.48	3.53733	4.328	3.57	2.65	4.43	2.13	3.292	3.4404	4.17	3.71	3.42174	6.26	3.24	5.38	1.67	3.52	5.56	5.23404	9.22	4.41	4.54	5.8574	6.48	6.3	8.29
11	0.135	0.5825	0.403	0.654333	0.85	0.72	1.28433	1.48	1.28	1.235	1.36	1.55	1.42767	2.04	1.77	2.76	1.469	1.13	1.99	2.81	2.86	1.7	2.81	2.74	3.124	2.71533	3.77	2.5	3.95	3.94	2.631	4.7336	2.27	4.75	3.55217	3.73	4.03	3.72	5.12	4.09	3.66	3.54706	5.07	4.685	5.34	3.77902	4.54	5.19	5.64
13	0.316	1.026	0.673333	0.989667	0.89	1.3	1.97733	1.31	1.15	1.783	2.03	1.34	1.82933	1.96	2.23	1.56	3.47	3.53	0.94	2.75	2.54	3.28415	2.51	2.81	2.4	3.29833	5.16	3.05	3.62	2.83	3.183	3.0824	4.18	5.2	4.32391	5.26	3.72	4.77	2.75	4.64	3.16	5.22546	3.91	4.822	4.41	5.88681	6.13	8.35	7.04
14	0.043	0.7785	0.932667	0.721667	0.82	0.24	1.60067	1.17	1.305	0.892	1.84	1.3	1.72167	1.68	1.47	1.48	2.296	1.67	2.64	2.32	1.88	2.37195	1.96	3.18	2.969	3.30567	2.85	2.11	2.25	3.3	2.44	3.946	1.96	2.96	2.73043	4.09	4.77	3.59	5.26	4.78	3.56	5.50026	6.42	4.052	4.22	6.08465	5.19	6.3	5.98
15	0.113	0.5495	1.02067	1.67433	1.2	0.26	1.64533	1.58	1.705	1.31	1.39	1.66	1.6	2.16	1.46	2.25	2.054	1.11	3.3	2.35	2.83	1.86098	2.86	2.41	2.63867	2.608	2.7	2.45	2.94	2.83	3.55	3.7138	3.26	3.13	4.13913	3.55	4.93	5.3		4.54	4.58	5.0598	6.24	4.972	4.63	5.05517	6.74	4.82	7.32
16	0.088	0.33			0.93	0.84		1.33	1.215	1.684	1.7	1.18		1.72	1.92	2.39	1.997	2.37	1.41	2.71	2.86	1.83293	2.83	2.38			3.12	3.97	2.18	2.63	2.243	3.335	4.56	3.22	4.11304	5.23	1.87	5.52	3.55	2.81	2.22	3.48927	6.29	3.844	3.38	3.59811	6.01	3.99	8.17
17	0.033	0.5015	0.617	0.76	0.97	0.72	1.18967	1.44	1.39	1.092	1.37	1.4	1.75467	1.91	1.96	1.18	1.838	2.37	1.87	2.17	2.56	2.69634	2.56	2.47	2.25533	2.31233	3.35	2.82	3.13	2.73	2.167	3.7696	3.64	3.89	3.72609	5.42	4.38	4.98	3.53	6.59	3.94	4.28652	6.18	3.085	7.28	5.31836	5.29	5.56	6.94
18	0.207	0.786	0.397	0.853667	1.24	2.98	1.41867	1.62	2	1.501	1.16	1.71	1.821	2.16	2.68	1.93	3.069	1.98	1.68	2.15	3.4	2.84268	3.75	4.05	3.69733	3.94467	4.33	3.37	4.13	4.49	3.648	4.4896	4.58	4.91	3.7	4.09	4.2	2.73	4.47	5.18	4.1	5.75226	3.21	5.281	5.29	4.75296	4.4	6.43	6.82
19	0.09		0.621	1.62767	0.86	1.5	1.76433	1.33	1.019	1.287	1.34	1.43	1.36733	1.84	2.15	2.21	1.989	2.35	2.95	1.86	2.02		2.29	2.9	3.24467	3.12233	2.11	3.14	3.51	3.76	3.881	3.4462	2.88	3.27		3.88	2.94	5.18	3.03	5.75	5.18	4.28518	4.6	5.48	3.38	5.36436	5.98	5.62	7.38
20	0.124	0.6275	0.980667	1.48067	1.01	0.47	1.31267	1.58	1.077	1.155	1.93	1.56	1.81767	2.11	2.62	2.28	2.569	2.2	3.09	3.59	2.91	3.25	2.97	3.53	2.53233	2.31833	3.77	3.48	3.26	2.24	3.8	4.6176	4.97		3.98913	4.47	3.83	5.03		5.49	3.86	5.44696	2.62	4.676	6.52	5.9214	5.46	6.11	7.68
21	0	0.8675	0.822667	0.811	0.85	1.6	0.541667	1.4	1.83	1.653	1.53	1.53	1.46433	1.98	2.35	2.02	2.014	2.49	1.13	2.47	2.74	3.34146	2.8	3.01	2.053	2.99833	3.21	2.92	3.02	1.91	2.704	3.3638	5.48	2.49	4.38478	4.63	3.02	4.38	7.15	3.73	2.92	4.04284	5.46	4.223	3.85	5.21892	5.66	7.39	6.21
22	0.097	0.7875	1.04567	0.532667	1.17	1.29	1.37567	1.55	1.565		1.51	1.82	1.647	2.01	2.63	1.74	2.042	2.1	3.01	2.16	2.99	2.61829	2.93	3.07	3.88267	3.606	4.44	3.12	2.55	3.94	2.964	3.2696	3.04	4.09	3.80435	5.39	6.57	4.41	4.36	6.23	6.16	4.69	4.2	4.596	5.71	6.66022	6.02	7.11	7.01
23			1.01933	1.28133	0.95	1.13	1.465	1.53	1.56	1.828	1.37	1.53	1.59433	1.96	2.18	2.96	2.988	2.21	1.56	2.24	2.97	3.58293	3.24	3.89	3.50733	3.069	3.64	2.21	2.51	2.66	3.31	3.6556		2.44	3.31739	4.09	4.98	4.42	4.62	4.59	4.6	6.39327	7.94	3.81	6.86	4.17462	6.95	8.93	7.26
24	0.211	0.482	1.35667	0.843	1.1	1.11	1.81167	1.59	1.529	1.837	1.57	1.72	2.081	2.25	1.7	1.78	2.652	3.33	2.63	3.35	3.4	2.52317	3.4	2.95	3.68367	4.16067	3.68	3.16	4.47	4.28	3.458	4.7666	2.89	5.29	4.55	3.65	5.26	2.73	5.46	4.31	4.46	4.63479	5.04	5.401	6.47	4.85885	6.86	10.76	6.78
25	0.061	0.786	1.041	1.54933	0.9		1.15267	1.44	1.08	1.687	1.27	1.47	1.86	1.93	1.59	2.23	3.231		2.03	2.12	1.57		1.93	1.91	3.77533	3.764	1.75	3.69	2.95	1.15	3.065		2.91	3.64	1.31304	2.98	2.6	3.31	2.06	3.99	4.62	4.90278	1.15	4.869	4.65	4.45915	5.87		6.06
27	0.042		0.716	0.515667	1.03	0.52	1.126	1.39	0.989	1.387	1.57	1.26	1.06867	1.77	1.51	1.49	2.318	2.92	3.21	2.23	2.4	2.37927	2.54	2.03	2.42533	3.40533	2.45	2.62	3.61	2.92	2.621	2.8182	3.82	3.59	3.64565	4.03	3.99	3.89	3.42	3.53	3.62	3.48089	4.31	3.154	4.55	4.04054	5.62	7.38	6.27
28	0.24	0.688	0.786	1.24367	0.91	0.92	0.207667	1.43	1.211	0.616	1	1.42	1.765	1.82	1.63	1.34	2.005		5.51	2.29	2.55	1.87805	2.55	3.37	3.03133	1.53333	1.36	2.43	2.17	3.78	3.271	3.0662	2.73		5.84565	2.66	4.27	3.29	3.83	6.09	4.98	5.12523	4	5.305	6.11	6.10168	4.43	3.69	4.72
29	0.017	0.69	0.325	0.830333	0.97		1.10933	1.4	0.915	1.483	1.85	1.34	1.133	1.73	1.7	1.39	2.515		2.37	2.6	2.61		2.59	2.58	2.24	2.39033	3.96	2.13	3.48	3.94	3.256	3.369	3.29	4.17	3.73261	1.82	4.27	2.78		5.21	3.7	3.78851	3.68	4.751	6.48	3.74962	5.72		5.6
30	0.225	0.6095	0	0.508333	0.89	1.62	1.20033	1.41	1.809	1.377	1.6	1.31	1.05267	1.72	2.1	1.88	1.359	1.68	4.27	1.92	2.79	2.66341	2.74	2.52	1.794	2.60967	3	2.24	3.34	2.02	3.196	2.6772	2.79	3.08	2.92174		2.91		5.53	3.03	2.72	5.0432	5	3.563	6.17		5.33	6.33	7.79
31	0.034	0.592	0.358333	0.445	1.3		1.467	1.77	1.821	1.37	1.61	1.87	1.51733	2.42	1.83	2.11	2.475		1.95	2.78	3.27	2.46341	3.41	3.1	3.55433	2.58567	3.32	3.69	4.32	2.6	4.393	2.5646	4.53	4.7	2.94783	2.38	4.56	3.46	2.84	4.39	3.92	4.6969	2.32	5.68	5.22	5.03851	6.38		7.73
32	0.141	0.878	0.549667	0.728333	0.95	0.59	1.703	1.59	1.585	1.513	1.15	1.55	1.66667	2.09	1.97	1.97	5	1.86	3.12	2.93	2.4	1.84634	2.61	2.37	3.22033	2.66733	2.77	3.58	3.83	5.31	3.829	3.5294	4.92	2.94	4.5587	4.66	3.98	4.48	4.16	4.53	2.58	5.15443	4.82	4.963	4.27	5.16812	6.59	5.1	7.3
33	0.187	0.8945	0	0.333333	0.98	1.83	2.06167	1.61	1.445	1.493	1.91	1.67	1.502	2.36	2.55	2.55	1.976	4.04	3.31	2.86	2.46	2.77439	2.54	2.8	2.52367	3.07233	3.22	2.84	3.97	5.72	3.708	3.2324	1.89	4.16	4.15217	3.99	4.38	3.86	4.39	4.14	3.24	3.48416	5.57	4.323	3.97	5.42744	5.38	10.44	6.72
34	0.158	0.6125	0.559333	0.479667	0.84	0.67	0.642333	1.26	1.299	1.581	1.03	1.31	1.201	1.61	1.59	1.91	1.018	2.32	2.5	1.93	2.88	2.02195	2.89	1.9	2.69933	2.41033	2.58	2.67	2.38	1.84	2.355	2.7458	3.54	2.12	1.73913	2.28	2.72	2.94	5.31	3.57	3.24	3.75713	2.93	4.607	2.93	3.33536	4.97	4.13	4.7
35	0.028	0.5425	0	0.674	0.86	1.24	0.922	1.29		1.397	1.43	1.39	0.87	1.73	2.26	1.75	1.784	1.55	0.56	2.21	1.73	2.73902	1.93	1.85	2.078	2.055	2.31	3.52	2.77	3.1	2.469	3.3914	3.15	2.96	2.27391		3.06		4.52	3.37	4.84	4.89862	2.55	2.727	3.06	4.85257	4.99	5.68	5.46
36	0	0.587	0.297333	0.201	0.96	0.1	0.424667	1.34	1.345		1.26	1.51	0.871	1.72	2.04	1.9	1.792		1.11	2	3.01	1.20976	2.97	2.91	2.88633	2.598	2.98	2.52	2.58	3.48	2.374	3.428	3.39	2.79	3.80652	2.05	5.57	2.33	2.45	4.55	3.48	3.48354	4.94	3.803	4.46	3.83419	4.43	6.75	6.33
37	0.136	0.696	0.701333	0.566667	0.88	1.44	0.505	1.3	1.45	1.346	1.31	1.37	0.854667	1.71	1.84	1.76	1.508	1.94	0.93	2.09	2.66	1.4622	2.57	2.5	2.51467	2.81167	3.59	2.33	2.19	5.22	2.61	3.3076	3.36	2.5	2.64565	3.28	3.56	4.55	4.43	3.83	3.86	4.72012	10.84	4.409	4.34	4.59078	5.79	5.45	5.71
38	0.061	0.566	0.152667	0.399333	0.72	0.93	0.959667	1.06	1.33	1.4	1.36	1.24	1.25633	1.52	1.17	0.88	2.201	2.05	1.73	1.39	1.55	1.54634	1.49	1.66	1.992	2.447	2.13	2.6	1.58	4.88	1.843	3.0526	2.01	1.62	2.85435	1.59	2.51	1.08	2.94	1.86	4.68	3.2946	4.3	3.728	2.15	2.61553	1.74	4.49	3.96
39	0.093	0.693	1.36333	0.649333	0.84	0.86	1.37133	1.39	1.375	1.702	1.62	1.5	1.59567	1.84	2.31	1.47	1.412	2.41	2.91	2.76	2.18	3.05488	2.32	4.09	2.35867	2.867	2.87	3.32	3.27	3.09	3.88	2.7348	4.75	2.68	3.30652	5.62	3.73	4.69	3.71	4.03	4.42	3.95446	4.74	4.025	3.24	6.20766	6.04	6.22	7.87
40	0.143	0.47	0.662	0.478667	0.72	0.3	1.412	1.02	1.09	1.19	1.75	1.14	1.18567	1.41	1.89	1.34	1.51	1.01	1.82	2.16	1.59	2.67317	1.53	2.46	2.23	2.02567	3.4	2.41	3.27	2.46	1.8	2.7388	2.76	2.5	4.07826	2.44	2.39	2.52	2.68	2.58	2.92	3.95261	3.58	3.513	2.82	3.6314	3.55	3.54	5.26
41	0.069	0.325	0.602	0.0983333	0.86	0.12	1.39033	1.43	1.215	1.177	1.2	1.37	1.457	1.89	1.35	1.15	1.764	3.17	3.8	1.25	2.73		3.05	1.17	2.824	1.63033	1.6	2.68	2.47	4.24	2.73	2.5958	1.26	1.75	2.83043	0.99	5.2	1.33	0.56	7.02	4.06	2.5103	3.08	4.468	5.64	3.67989	4.96	3.86	3.6
42	0.008	0.335	0.847667	0	0.81		1.26567	1.17	0.901	1.349	0.85	1.27	1.73133	1.63	0.91		2.2		0.66	1.45	1.85		1.94	1.4	2.01833	2.25533	1.87	2.57		4.96	1.811	2.1464	3.01	3.51	3.39783	2.49	3.85	1.66	0.23	4.35	3.4	1.98437	1.15	3.418	3.04	3.16852	2.4		3.42
43	0.009	0.428	0.559667	0.951	0.85	1.32	1.70667	1.31		1.032	1.52	1.23	1.38867	1.65	1.77	1.26	2.154	3.07	2.59	2.71	2.01	2.14634	2.05	3.08	4.07967	3.64167	2.74	3.94	2.28	1.68	2.87	3.1676	5.3	4.77	3.22609	3.53	5.4	2.63	5.39	4.88	5.42	3.96248	6.41	4.307	4.66	4.02183	5.57	8.88	6.63
44	0.018	0.419			0.92	1.28		1.38	1.319	1.891	1.35	1.29		1.7	2.21	0.75	1.849	2.48	1.2	3.22	2.92	2.36585	3	2.72			3.57	3.59	3.89	4.24	3.074	3.6634	3.18	4.85	2.64783	3.87	5.26	3.3	7.13	4.1	5.4	5.56551	5.66	4.564	4.13	6.21697	4.15	5.47	5.62
45	0.1	0.7105	0.593	1.04967	0.82		1.65567	1.26	1.6	1.368	0.93	1.51	1.52833	1.8	1.77		1.139		2.79	2.19	1.76		1.92	2.44	2.57833	2.931	2.89	2.26	2.89	4.96	3.541	3.8778	5.2	3.48	4.55435	2.52	2.82	4.32	2.78	4.24	2.32	3.18281	3.92	4.636	3.16	5.49529	5.45		7.03
46	0.113	0.9125	0.806667	0.747667	0.89	0.53	1.64967	1.42	1.68	1.325	1.19	1.36	1.46667	1.8	2.62	2.45	1.567	2.51	2.13	3.13	1.69	3.45976	1.74	3.28	2.393	3.49967	3.56	2.93	3.88	1.68	3.526	2.6952	4.62	3.61	3.6587	6.05	3.26	5.42	4.8	4.07	5.12	3.94689	8.07	4.547	4.52	5.60503	6.76	8.15	8.59
47	0.319	0.7645	0.728333	0.522333	0.81	1.12	1.185	1.28	1.606	0.835	1.22	1.26	1.41167	1.71	1.54	1.52	2.166	1.73	3.01	1.37	2.32		2.4	2.19	2.44833	2.52067	2.38	2.99	1.98	4.96	2.511	4.5988	1.59	1.93	2.73913	1.41	4.46	1.43	2.87	5.64		4.81501	2.49	3.371	4.92	3.9696	3.24	4.26	4.6
48	0.012	0.45	0.972333	0.592	0.85	0.63	1.392	1.46	1.709	1.203	1.3	1.63	1.49433	2.21	2.15	2.57	3.376	1.51	1.34	2.69	2.41	3.27439	2.66	2.99	3.42133	2.77267	3.18	3.55	4.27		3.979	3.4534	4.43	4.14	4.13478	5.07	5.32	3.23	6.08	5.19	5.02	5.83075	4.28	5.791	5.84	5.26098	6.86	8.82	7.33
49	0.064	0.4	1.122	0.380333	0.8	0.94	1.21567	1.15	1.049	0.622	1.08	1.42	1.64933	1.6	1.17	1.68	2.42	4.26	1.86	0.75	1.69	1.93415	1.64	1.69	2.63833	1.51867	1.93	2.7	1.65	5.22	1.969	3.2958	1.51	1.38	1.70652	1.76	4.02	2.39	1.98	3.13	3.6	3.00819	6.78	3.44	5.45	2.56613	3.02	7.27	4.46
50	0.062	0.4545	0.941667	0.409333	0.94	0.47	0.755	1.48	1.09	0.928	1.18	1.48	1.123	1.9	1.36	2.5	2.156	2.3	1.95	2.45	2.7	2.7	2.87	1.61	1.93	2.438	2.23	2.44	3.28	3.48	2.419	3.1034	3.57	3.23	4.41304	1.72	4.63	3.7	3.51	5.95	3.7	4.11155	6.49	3.292	4.74	4.82998	9.57	7.22	5.79
51	0.044	0.6965	1.34933	0.411	0.88	0.31	1.932	1.47	1.519	1.325	1.19	1.58	1.703	2.1	2.52	2.22	2.027	3.32	1.43	2.58	2.18	3.41585	2.24	3.19	2.47633	2.94933	3.53	3.95	3.54	3.1	2.656	2.7754	4.34	4.51	5.31522	3.87	3.61	5.12	4.62	4.09	4.96	3.79341	5.17	3.336	5.28	5.25232	5.89	7.78	9
52	0.068	0.7405	0.915667	0.914	0.93	2.46	1.271	1.5	1.575	1.462	1.68	1.42	1.67933	1.87	1.99	1.85	1.65	2.56	2.73	2.36	2.09	2.90732	2.09	3.01	2.42767	3.39333	3.1	2.8	3.34	2.02	3.934	3.3846	4.22	4.23	3.61739	4.52	3.44	4.03	4.16	4.08	4.7	4.68847	6.53	4.92	4.48	5.65324	6.89	6.17	7.11
54	0.193	0.861	0.738333	0.204	1.06	0.74	1.86233	1.61	1.819	1.522	1.23	1.62	1.63433	2.19	2.01	1.72	2.923	2.99	1.06	2.39	2.98		3.21	3.42	2.79933	2.89167	3.08	3.01	3.71	2.9	3.837	3.4456	3.12	4.73	3.29565	2.52	4.32	3.24	5.02	4.93	4.3	4.30286	3.35	5.501	5.12	6.3555	5.92	6.15	8.04
55	0.063	0.6665	0.61	0.486667	0.75		1.50567	1.27	1.525	1.385	1.26	1.44	0.968	1.83	1.99	1.25	1.608		2.95	1.98	2.16		2.15	2.83	3.111	2.44333	2.94	1.96	3.59	3.11	2.873	2.9238	2.88	3.37	3.31739	3.02	3.42	3.93	1.58	4.66	3.64	2.91278	2.65	4.553	4.3	5.58329	3.99		6.07
56	0.134	0.926	0.718333	0.697667	0.77	1.12	1.019	1.32	1.35	0.846	1.28	1.55	1.613	1.94	2.99	2.24	1.282	2.01	2.84	3.31	2.22	3.44024	2.31	2.87	2.43467	3.489	4.49	3.29	3.86	3.86	3.536	3.0094	3.35	4.38	5.11304	4.66	4.2	5.06	4.41	5.44	4.1	5.63866	7.2	5.311	4.69	6.49488	7	9.52	7.9
57	0.152	0.3965	1.523	0.974	0.9	1.34	1.33633	1.39	1.014	1.074	1.87	1.45	1.65433	1.94	2.04	1.45	2.371	1.86	0.94	1.95	2.84	2.71341	3.03	2.24	2.28167	2.81333	1.91	2.84	3.89	2.97	3.129	3.7096	2.56	4.66	4.27391	4.65	3.51	4.69	4.61	3.3	4.32	4.48291	8.36	5.261	4.56	5.98191	7.17	5.97	7.95
58	0.253	0.809	0.655333	1.345	0.97	1.52	2.061	1.53	1.42	1.837	1.64	1.67	1.55733	2.22	2.16	2.89	2.756	3.47	3.99	2.97	2.73	2.40732	2.83	3.3	2.397	2.41967	3.51	3.71	3.82	2.95	4.338	3.6502	4.92	4.08	4.12609	4.66	4.61	5.69	3.72	4.11	6.58	4.29138	7.31	5.605	4.91	6.66661	7.34	9.9	8.81
59	0	0.3365	0.860333	0.756	0.64	0.48	0.599	0.93		1.472	1.21	0.95	1.46733	1.17	1.47	1.94	1.398	1.65	3.22	2.78	1.14		1.36	1.79	1.78933	2.55067	2.52	2.5	2.53	3.83	3.346	2.7812	1.9	2.89	2.82826		2.37		3.75	2.18	5.72	3.23484	3.83	4.975	2.64	5.50334	4.72	6.96	4.87
60	0.062	0.3985	0.717667	0.716333	0.94	2.13	1.71933	1.45	0.905	1.537	1.68	1.48	1.60567	2.04	2.63	2.28	1.998	1.75	3.83	2.6	2.48	2.70366	2.5	2.22	2.097	2.134	3.63	2.85	3.12	3.6	3.664	2.8068	5.28	2.72	5.06087		2.77		4.41	2.99	4.14	3.65329	6.04	4.628	2.54	5.12152	5.61	4.01	6.07
61	0.135	0.709	0.333667	1.02833	0.72	1.26	1.04	1.26	0.99	0.935	1.62	1.4	1.026	1.81	1.79	1.66	1.287	2.48	2.38	1.84	2.99	2.45976	2.99	3.24	1.54333	3.15767	3.01	2.81	2.51	3.29		2.1888	6.07	2.69	3.65652	4.04	3.12	3.39	3.78	3.8	5.02	5.20903	4.7		5.23	4.75809	6.06	6.1	6.28
62	0.019	0.71	0	0.838333	1.02	1.19	0.971667	1.5	1.611	1.167	1.44	1.62	1.02167	2.07	1.8	2.08	1.796	2.44	1.62	2.64	2.4	2.64878	2.59	2.59	2.90567	3.37633	3.27	3.26	2.61	3.98	3.588	2.0826	3.05	3.18	3.55217	3.86	4.54	4.42	1.56	5.18	4.94	4.73979	10.03	5.947	4.42	5.30714	4.72	7.1	6.22
63		0.68	0.569667	1.29767	0.83	0.22	0.796333	1.35		1.345	1.56	1.45	2.07533	2.08	1.77	2.88	3.75	1.87	1.31	1.91	2.41	2.98659	2.75	2.7	2.559	2.74233	3.37	2.58	4.01	2.38	1.853	3.506	2.93	4.21	2.63478	4.22	3.3	4.09	4.48	3.64	4.36	4.65117	2.62	3.532	3.85	5.72352	5.97	5.08	6.96
64	0.115	0.7015	0.921333	1.07867	0.95	1.34	1.30733	1.37	0.985	1.658	1.61	1.33	1.51667	1.95	2.17	3.06	1.851	2.13	1.7	2.6	2.71	2.59756	2.73	2.86	3.31733	3.08867	3.25	2.71	2.4	2.09	3.508	3.7104	2.94	2.29	4.33478	4.52	4.28	3.72	4.24	4.15	4.78	4.49007	5.28	5.609	4.95	5.932	4.17	6.74	6.15
65	0.083	1.0225	0.817333	1.838	1.06	1.77	0.793667	1.58	1.475	1.379	1.98	1.41	1.50133	1.98	1.76	2.97	3.418	1.77	2.12	1.62	2.08	$0	2.18	2.91	1.92767	2.77267	3.73	3.32	3.74	4.05	4.003	2.9952	4.75	3.83	4.13261	4	3.54	5.61	4.51	4.89	3.86	4.39131	3.71	4.4	4.97	4.53938	6.21		7.25
66	0.077	0.6465	0.324333	0.66	0.91	2.23	1.76567	1.39		1.275	1.6	1.25	1.53067	1.96	2.39	2.7	2.766	2.41	1.74	2.03	3.17	2.51951	3.14	3.3	3.68667	4.413	3.3	3.68	3.31	4.68	4.064	2.2626	2.3	3.74	4.46087		3.82	5.55	3.24	5.22	4.7	3.47578	6.26	5	5.94	6.59862	6.48	6.32	8.99
67	0.348	0.775	0.506667	0.648	0.71	0.99	1.72967	1.24	1.075	1.405	1.07	1.36	1.529	1.66	2.11	2.76	1.448	2.17	3.43	2.81	2.37	2.81463	2.4	2.17	2.719	2.68	2.43	3.35	3.15	2.48	3.518	3.1558	4.38	3.18	3.36304	4.6	3.13	5.21	3.75	3.69	4.02	3.85249	2.95	4.442	4.6	4.15485	5.97	4.69	7.36
69	0.054	0.743	0.723333	1.96967	0.99		1.84367	1.54	1.219	1.321	0.96	1.44	1.59233	2.03	2	1.64	3.569		1.58	2.86	2.66	0	2.62	3.29	3.54	3.10167	2.46	2.6	2.72	3.34	3.028	3.4966	2.82	3.85	4.0587	3.7	3.9	4.9	3.08	5.43	4.08	5.66044	1.6	3.811	5.7	5.11739	3.21		7
70	0.221	0.5635	0.662667	0.933	0.83	0.68	1.28667	1.29	1.095	2.058	2.06	1.12	1.34933	1.64	2.16	2.12	2.228	2.47	1.85	2.57	1.79	2.38902	2.03	3.18	1.892	2.70367	3.15	3.25	2.45	2.41	3.74	3.629	3.45	3.02	2.51522	4.65	1.89	5.27	3.69	2.3	3.3	3.62998	5.98	4.877	3.52	4.17901	3.9	4.79	6.24
71	0.102	0.9655	0.681667	1.70733	0.81	0.34	1.69767	1.31	1.58	1.997	1.22	1.5	1.985	1.85	2.06	2.94	1.857	2.05	2.96	1.93	2.19	2.66098	2.27	2.19	2.54033	3.284	4	4.11	4.27	2.87	3.537	2.8766	5.17	4.81	5.94783	4.84	2.82	4.33		4.39	3.54	5.08724	5.8	4.357	4.02	5.66927	5.67	9.25	7.05
72	0.095	0.452	0.414667	0.792333	0.74	1.22	1.09733	1.12	1.386	1.727	1.37	1.03	1.27867	1.43	1.69	2.38	1.82	1.43	1.79	1.79	2.1	1.9	2.08	1.98	2.105	2.768	2.35	3.16	1.98	1.48	2.53	3.7254	4.67	2.43	3.41522	4.34	2.33	4.35	5.88	2.24	4.34	3.96407	3.8	3.889	2.23	3.08222	4.24	6.17	6.23
80	0.143	0.5805	0.473667	0.45	0.89		1.02567	1.34	1.446	1.063	1.5	1.47	1.232	1.84	1.63	2.27	2.28		0.92	2.45	2.32	1.89024	2.26	2.95	2.92167	2.74567	2.29	3.45	2.05		3.129	2.308	2.79	3.18	3.12174	2.98	4.4	2.99	3.23	4.03	3.26			5.483	4.46	2.97533	4.21		5.56
86	0.11	0.5515	0.272667	0.771667	1.23	1.5	1.04133	1.54	1.46	1.431	0.86	1.66	1.44933	2.03	1.76	2.59	1.723	2.14	2.23	2.37	2.85	2.26951	2.81	2.93	2.76333	3.20733	3.21	2.38	2.07	2.5	2.36	2.5196	2.4	3.87	2.76304	3.41	3.04	4.19	3.95	3.3	4.54	4.46722	2.93	3.706	3.4	5.16634	4.43	5.93	6.16
87	0.075	0.659	0.927333	0.82	1.06	0.52	1.245	1.55	1.7	1.588	1.5	1.77	0.948	2.28	1.76	2.18	2.887	1.61	2.6	2.82	3.06	1.91707	2.8	3.29	3.62167	3.01867	3.06	3.16	2.98	1.27	4.53	3.7874	1.74	3.28	4.75652	3.13	3.45	3.95	7.31	3.5	4	4.37787	5.67	5.368	4.16	4.82717	5.23	6.23	7.1
88	0.055	0.368	0.645333	0.776	1	2.42	0.524667	1.49	1.59	1.29	1.39	1.49	1.37867	1.99	2.29	2.14	2.105	2.08	1.42	2.59	2.87	3.32073	2.88	2.94	2.43867	2.36667	2.51	3.38	3.12	1.26	3.238	2.5024	3.8	3.52	3.41522	3.63	3.27	5.41	6.41	3.88	4.78	4.84951	3.71	4.849	4.76	6.72609	6.74	7.14	6.64
90	0.284	1	0.969	0.107667	1.02	0.73	1.80433	1.6	2.42	1.104	1.33	1.76	1.95133	2.29	2.59	2.48	2.99	4.29	2.56	2.46	2.82	3.45366	2.89	3.23	2.80267	3.63567	4.32	3.81	4.19	1.71	5.356	3.9534	2.51	3.6	4.3087	3.87	4.56	4.8	4.91	4.66	4.48	5.74298	5.93	5.733	5	6.02485	7.95	8.47	11.03
91	0.072	0.612	0.822667	0.123667	1.03	0.25	1.18167	1.62	1.7	1.189	1.65	1.57	1.58367	2.17	2.2	1.67	2.639	3.89	1.69	2.07	3.72	1.51829	3.99	2.64	2.79033	2.77133	3.45	3.46	3.11	3.19	4.685	4.1784	5.84	4.17	2.11739		4.62		6.93	4.5	3.84	5.10172	4.31	5.134	4.57	3.9102	7.49	6.06	7.9
92	0.03	0.4645	0.325	0.217667	0.88	1.76	0.803333	1.35	1.399	1.584	1.67	1.23	0.857667	1.72	1.83	1.27	1.418	1.95	2.11	2.92	2.46	1.83415	2.4	2.38	2.10333	2.483	3.48	1.99	2.82	2.55	3.082	3.1038	3.84	3.34	2.1413	3.31	3.93	2.84	4.69	3.22	4.46	3.66045	1.56	5.156	5.2	4.88765	6.05	6.63	5.98
93	0.071	0.4825	0.634667	0.529333	1.16	0.65	1.402	1.62	1.26	1.377	1.49	1.76	1.21567	2.36	2.4	2.08	3.015	2.35	2	2.31	2.93	3.73415	2.85	2.87	2.15867	3.59233	3.71	2.22	3.53	3.33	4.643	3.5184	4.22	3.54	4.0087	3.9	2.99	4.71	4.9	3.31	3.84	4.03763	4.52	5.608	4.91	4.67829	5.94	9.02	6.72
94	0.033	0.6235	0.106667	0.0823333	0.76	0.45	0.386667	1.28	1.109	0.995	0.66	1.34	0.899667	1.78	1.69	1.71	0.731	1.02	3.42	1.76	2.17	2.58293	2.28	2.17	2.14333	2.64467	1.64	2.81	2.61	1.59	3.359	2.4722	3.55	3.53	3.48696	2.52	3.21	3.5	4.79	3.1	4.92	3.14145	5.27	4.409	5.09	5.72642	3.07	7.01	5.01
96	0.12	0.794			0.82	3.14		1.2		1.492	1.74	1.41		1.88	2.18	2.89	2.055	3.18	4.58	2.46	1.91	2.58537	2.01	2.65			4.23	2.45	2	2.14		2.9606	4.06	3.79	4.23478		4.03		5.93	3.58	4.68	4.85012	3.47	4.657	4.02	4.60331	5.67	8.13	6.96
97	0.021	0.7675	0.482333	0.369333	0.69	1.28	1.60967	1	1.365	1.413	1.13	1.38	1.30033	1.65	2.12	2.67	1.207	1.99	1.87	2.65	1.93	2.9	2	2.6	2.41767	3.24533	2.3	3.74	3.12	3.19	2.444	2.8756	3.36	3.99	1.49565	4.77	3.65	5.34	4.92	3.44	2.82	3.55923	8.2	3.797	3.85	6.2858	6.59	2.9	6.67
98	0.411	1.0495	0.609333	2.35733	0.79		1.95433	1.18		1.456	1.47	1.48	2.134	1.9	1.3	2.91	2.014		3.22	2.99	1.86		1.98	1.5	2.89967	2.93367	2.3	4.24	3.85	2.55	3.086	2.5708	3.31	4.6	3.6413	3.24	2.88	3.57	1.21	4.2	2.9	5.09316	$0.55	4.577	4.97	5.49017	6.95		6.5
99	0.013	0.516	0.493	0.440333	0.8	0.49	1.18633	1.18	1.535	1.232	1.42	1.41	1.36833	1.75	1.69	2.71	1.526	0.81	1.8	2.37	2.24	3.36585	2.26	2.25	3.366	2.51233	2.23	3.39	3.5	3.33	3.052		4.78	3.96	3.33913	4.41	2.46	4.16	5.44	3.65	3.08	4.00669	4.46	5.085	3.13	4.52443	6.69	4.58	7.5
102	0.1	0.9335	0.259667	0.834667	0.95		1.34567	1.46	1.521	1.244	1.24	1.67	1.527	2.23	2.16	3.15	2.836		3.26	2.18	2.15		2.24	3.24	3.128	2.08967	3.04	4.04	4.03	3.33	4.038	3.439	2.51	3.57	4.62174	3.18	4.77	4.24	2.94	4.02	6.42	4.96993	2.39	5.78	5.41	5.66941	5.07		7.62
104	0.057		0.747	0.381	1.02		0.55	1.61	0.971	0.798	1.71	1.52	1.67267	2.07	2.44	2.42	2.6	1.16	3.15	2.97	3.44	1.85122	3.54	2.93	2.824	2.499	2.77	2.59	3.09	1.15	3.954	1.9632	4.53	3.67	3.12391	4.22	4.37	3.55	5.28	4.6	3.42	4.51962	2.44	5.58	5.34	4.7231	6.38	2.8	8.8
105	0.007	0.545	0.684	0.896333	0.77		1.51633	1.07	1.339	1.394	1.59	1.06	1.23433	1.55	1.92	2.19	1.957	1.43	2.04	1.56	2.27	1.66707	2.2	3.12	2.99	2.51933	3.75	3.97	2.86	3.54	3.011	3.2616	2.98	1.87	2.92826	3.44	3.74	4.02	4.59	4.48	3.96	5.1125	4.11	4.87	5.98	4.41911	5.61	7.63	7.09
114	0.176	1.024	0.239667	0.455	1.07		0.737	1.56	1.56		1.82	1.5	0.718	2.03	2.16	2.37	2.122		2.62	2.72	3.32		3.34	2.63	2.95867	3.19333	3.12	3.39	3.92	4.63	3.402	3.6192	2.48	3.92	4.41087	4.31	5.76	4.01	3.52	7.85	4.64	5.54505	1.82	5.411	4.08	4.41642	6.22		6.5
115	0.018	0.567		2.68533	1		0.664	1.55	1.066	1.962	1.79	1.69		2.3	1.12		2.505		2.09	3.19	2.51		2.48	1.28	3.75167	2.697	1.74	3.71	3.79	3.54	2.917	2.681	3.31	3.95	2.39348	3.99	3.09	3.38		3.26	4.62	4.12311	1.85	6.6	3.94	3.19069	4.86		5.53
124	0.01	0.729	0.737	0.735	0.81	0.95	0.861333	1.17	1.275	1.663	1.36	1.15	0.87	1.72	1.64	3.25	2.281	3.18	0.61	3.53	2.33	1.9378	2.31	3.09	3.24733	3.277	3.4	2.66	3.26	2.88	3.415	1.942	4.13	4.49	2.66522	2.32	4.98	3.39	5.93	4.24	3.3	4.44024	3.7	6.335	5.04	3.30927	5.46	2.57	5.45
127	0.102	0.4165	0.763	0.447333	0.86	1.14	1.60467	1.42	1.325		1.34	1.29	0.856667	1.76	1.71	2.15	3.29	2.29	1.48	2.72	2.31	1.98171	2.31	2.86	1.68733	2.71533	2.39	2.19	2.63	1.44	3.338	2.781	4.42	4.28	2.7413	3.64	2.57	3.94	3.5	2.26	4.62	4.5431	4.17	4.605	5.82	4.25953	3.79	7.11	4.91
128	0.133	0.688	0.606333	0.335667	0.72	0.31	1.17	1.03	1.015	1.277	1.59	1.24	1.16533	1.54	1.88	2.95	2	2.17	3.14	2.69	1.58	3.01585	1.83	2.6	2.227	2.902	3.2	3.02	2.9	1.75	3.198	2.718	3.64	3.98	3.39348	5.18	3.16	5.16	4.17	4.14	4.18	3.55376	5.54	4.148	5.24	5.2475	6.18	8.84	7.3
143	0.053	0.456	1.08133	1.65333	0.84		1.80533	1.37	1.2	1.332	1.77	1.53	1.86133	1.91	1.77	3.61	2.246		1.36	3.62	1.67		1.75	2.62	3.44867	1.587	2.43	4.05	4.91	2.45	3.288	3.9504	4.66	4.83	3.86957	4.56	5.96	6.33	3.18	6.33	3.44	5.37124	2.05	4.487	5.69	5.58945	4.97		6.65
144	0.073	0.4265	0.588333	0	0.81	0.2	0.137	1.2	1.45	1.04	0.47	1.37	1.30833	1.65	1.51	1.33	2.357	1.31	1.03	1.31	2.17		2.13	1.66	2.942	1.65533	1.47	2.94	2.29	3.2	1.77	2.5386	1.17		2.75652	1.74	3.31	1.3	$0.6	4.52	3.44	4.13712		3.09	2.7	4.37752	2.95		4.88
146	0.053	0.678	0.748333	1.05733	0.98		0.996333	1.56	1.829	1.719	1.27	1.51	1.772	2.05	1.6	3.09			7.97	2.54	2.18		2.26	2.11	2.83133	2.58733	2.4	4.05	2.97	3.14	3.666	4.2024	3.39	3.92	5.11739	3.92	5.13	3.61	2.18	8.65	4.46	5.04423	1.8	4.831	7.48	5.94315	5.33		6.67
Mean	0.102111	0.645931	0.667258	0.784247	0.910952	1.03448	1.25947	1.3831	1.37929	1.37494	1.40857	1.44536	1.44195	1.89774	1.93214	2.1321	2.20595	2.2506	2.31619	2.40345	2.45667	2.48234	2.52286	2.65512	2.74311	2.83472	2.98786	3.03643	3.16265	3.11476	3.20499	3.21855	3.53349	3.56049	3.56755	3.71468	3.85786	3.96218	4.04436	4.32071	4.21766	4.41735	4.65914	4.61525	4.6325	4.94183	5.4825	6.40088	6.62714
Mean 2007	ELWLW 0-3h
1	0.23	0.4505	0.521333	0.617	0.8	1.21	1.835	1.14	0.87	1.568	1.38	1.48	1.28067	1.63	2.15	2.74	1.796	3.05	4.03	3.51	1.96	1.96951	2.13	2.37	2.53367	3.38633	2.69	2.63	2.1	3.03	2.875	3.58	3.3	3.32	2.88696	3.73	1.93	3.71	4.16	3.81	3.7	4.3129	2.18	3.231	4.68	4.58993	3.81	8.23	5.83
2	0.272	0.7545	0.591	1.577	0.87	0.28	1.96833	1.38	1.091	1.552	2.38	1.58	1.97033	1.93	1.64	2.04	1.43	2.6	4.97	2.62	2.19	2.51829	2.39	2.47	1.62667	2.83067	2.92	3.29	2.68	4.48	3.482	3.0118	2.82	3.84	3.5413	3.33	2.85	2.62	3.9	4.02	4.86		2.92	4.965	4.8	4.87399	6.39	9.2	7.22
4	0.107	0.636	0.434	0.913667	0.81		1.59167	1.19	0.891	1.861	1.86	1.4	1.78067	1.84	1.93	2.14	1.865		2.5	3	2.01		2.28	2.26	3.74933	3.34567	2.54	2.86	3.19	3.37	3.154	3.9092	3.02	3.1	2.7413	2.73	3.08	2.24	2.12	3.36	2.7	3.65657	1.77	5.892	6.75	3.76945	4.49		3.76
5	0.06	0.696	0.718667	0.560333	0.98	0.82	1.40633	1.41	2.079	1.464	1.27	1.45	1.562	1.73	1.62	3.21	2.585	1.92	1.19	2.87	2.1	3.20488	2.29	2.53	2.56833	3.288	2.77	3.49	4.95	7.34	3.27	3.393	6.43	5.25	3.7413	4.48	2.9	5.18	7.46	3.17	4.16	3.9775	6.14	4.23	3.89	7.31431	7.83	3.84	8.12
7	0.121	0.841	0.804	0.456333	1.14		1.61433	1.55	1.93	1.582	1.36	1.63	1.67567	1.97	1.67	2.1	1.75		1.1	2.66	2.84		2.96	1.64	2.44467	2.23333	2.81	3.66	3.62	2.84	3.82	3.5108	2.22	2.91	4.57826	4.92	4.51	3.45	4.5	5.44	7.1	4.74423	3.4	4.548	3.75	5.64566	5.44		6.34
9	0.032	0.8725	0.835	0.454	1.06	0.46	1.143	1.7	1.686	1.535	1.7	1.76	1.704	2.46	1.83	2.3	2.351	3.64	2.61	2.22	3.93	1.87561	3.85	2.16	3.006	3.17767	2.64	2.27	2.35	1.18	2.96	4.0558	3.03	3.8	3.41957	4.73	4.78	5	5.74	4.92	4.52	4.70521	5.88	4.818	7.49	4.48623	6.75	6.26	6.2
10	0.015	0.9375	0.86	0.0413333	1.02	0.31	1.45133	1.51	1.709	1.349	1.64	1.63	1.694	2.35	2.72	2.52	2.839	1.6	1.69	1.46	2.93	3.62195	3.16	3.6	2.874	2.21533	4.27	1.42	3.8	5.16	4.269	4.7688	2.37	3.96	3.76087	4.6	4.84	4.14	5.73	5.23	5.72	4.46791	6.6	6.965	5.06	4.60256	6.9	5.07	7.71
12	0.147	0.34			0.95	0.62		1.52	1.52	1.31	1.36	1.53		1.92	1.82	1.6	2.803	2.2	4.27	1.78	2.12	2.52927	2.35	2.14			2.82	2.9	4.12	3.36	3.582	1.99	3.37	4.39	5.17174	5.11	3.86	5.67	3.28	4.14	5.64	5.48299	6.35	4.825	4.85	7.60159	6.12	6.56	6.5
26	0.177	0.934	0.661667	3.37167	0.85		2.27233	1.36		2.004	1.97	1.58	2.04067	2.03	1.61	1.99	1.431		5.49	3.05	2.04		2.07	2.24	2.864	3.90033	2.51	4.44	2.93	2.3	2.354	2.7438	3.32	2.98	4.88478	2.66	5.31	2.79	3.88	4.98	3.3	3.30443		3.395	7.12	5.89266	4.98		7.45
53	0.05	0.444	0.419667	1.39767	0.85	1.05	1.60633	1.42	1.56		1.01	1.4	1.47733	1.94	1.83	2.82	3.13	1.95	2.05	2.82	2.53	3.15122	2.81	3.07	2.427	2.68733	2.58	3.96	3.75	3.56	2.871	3.4882	4.61	4.74	3.98696	5.21	4.04	5.4	6.38	5.58	4.74	5.3819	4.17	5.283	5.02	4.49863	6.45	3.88	9.17
Mean 10 ELWL	0.1211	0.6906	0.649481	1.04322	0.933	0.678571	1.6543	1.418	1.48178	1.58056	1.593	1.544	1.68726	1.98	1.882	2.346	2.198	2.42286	2.99	2.599	2.465	2.69582	2.629	2.448	2.67707	3.00719	2.855	3.092	3.349	3.662	3.2637	3.44514	3.449	3.829	3.8713	4.15	3.81	4.02	4.715	4.465	4.644	4.44818	4.37889	4.8152	5.341	5.3275	5.916	6.14857	6.83
Ratio !0/rest	1.18596	1.06915	0.973358	1.33022	1.0242	0.655956	1.31349	1.02524	1.07431	1.14955	1.13093	1.06825	1.17012	1.04335	0.974048	1.10032	0.996395	1.07654	1.29091	1.08136	1.00339	1.086	1.04207	0.921993	0.975928	1.06084	0.955534	1.0183	1.05892	1.17569	1.01832	1.0704	0.976088	1.07541	1.08514	1.11719	0.987595	1.01459	1.16582	1.03339	1.10108	1.00698	0.93985	1.04332	1.15294	1.07804	1.07907	0.960582	1.03061
Overall advantage	1.065
	Yield/plant_S_Spain99	GrWt/plant/NFF_1994	Yield	dYield 2012	Yield/pl_droughted_Zaj06	Grain_wt/plant_rain_Kaz00adj	dYield 2011	Yield/pl_mn_Droughted_Zaj05	Diff_ear_dwt_SUSTExp2	moddrought_Yield/plant_T14_Krakow08	Yield/plant_sev_dr_Krakow10	Yield/pl_control_Zaj06	cYield 2013	Yield/pl_mn_Rainfed_Zaj05	GrainYd/plant_(Ht_adj)_N1_97	cont_Yield/plant_T35_Krakow08	Regr_adj_Yd/plant_Zaj02	Grain_yd/plant_irrig_Kaz00	Yield/plant_M_Spain99	Yield/plant_sev_drought_Krakow07	Yield/plant_rainfed_Zaj01	Grain_wt/plant/GH/1994	Yield/plant_irrig_Zaj01	GrainYield/plant_N2_97	cYield 2011	cYield 2012	GrainYd/plant_(Ht_adj)_N3_97	Yield/plant_cont_Krakow10	Yield/plant_mod_drought_Krakow07	Grain_yd/plant_A_Kaz98	Yield/plant_rain_Zaj00	Consel 2003(50pl/row)	Vern_Total_yield/pl_Krakow06	Yield/plant_control_Krakow07	Grain_wt/plant/Mor_1994	75ppb_Mn_Grain_wt/pl_03	GrainYd/plant_(Hr_adj)_N1_98	NFA_Mn_Grain_wt/pl_03	Non-vern_Total_yield/pl_Krakow06	GrainYd/plant_(Ht_adj)_N2_98	Conselice_Yield/plant_04	Yield_g/plant_adj(2,80)_Idice03	Grain_yd/plant_B_Kaz98	Yield/plant_irrig_Zaj00	GrainYield/plant_N3_98	Idice_Mn_Yield/plant_13%_04	Total_yield/plant_75ppb_05	Grain_yd/plant_A_Kaz99	Total_yield/plant_NFA_05
Highest 10 CSDH lines
37	0.136	0.696	0.701333	0.566667	0.88	1.44	0.505	1.3	1.45	1.346	1.31	1.37	0.854667	1.71	1.84	1.76	1.508	1.94	0.93	2.09	2.66	1.4622	2.57	2.5	2.51467	2.81167	3.59	2.33	2.19	5.22	2.61	3.3076	3.36	2.5	2.64565	3.28	3.56	4.55	4.43	3.83	3.86	4.72012	10.84	4.409	4.34	4.59078	5.79	5.45	5.71
38	0.061	0.566	0.152667	0.399333	0.72	0.93	0.959667	1.06	1.33	1.4	1.36	1.24	1.25633	1.52	1.17	0.88	2.201	2.05	1.73	1.39	1.55	1.54634	1.49	1.66	1.992	2.447	2.13	2.6	1.58	4.88	1.843	3.0526	2.01	1.62	2.85435	1.59	2.51	1.08	2.94	1.86	4.68	3.2946	4.3	3.728	2.15	2.61553	1.74	4.49	3.96
42	0.008	0.335	0.847667	0	0.81		1.26567	1.17	0.901	1.349	0.85	1.27	1.73133	1.63	0.91		2.2		0.66	1.45	1.85		1.94	1.4	2.01833	2.25533	1.87	2.57		4.96	1.811	2.1464	3.01	3.51	3.39783	2.49	3.85	1.66	0.23	4.35	3.4	1.98437	1.15	3.418	3.04	3.16852	2.4		3.42
43	0.009	0.428	0.559667	0.951	0.85	1.32	1.70667	1.31		1.032	1.52	1.23	1.38867	1.65	1.77	1.26	2.154	3.07	2.59	2.71	2.01	2.14634	2.05	3.08	4.07967	3.64167	2.74	3.94	2.28	1.68	2.87	3.1676	5.3	4.77	3.22609	3.53	5.4	2.63	5.39	4.88	5.42	3.96248	6.41	4.307	4.66	4.02183	5.57	8.88	6.63
44	0.018	0.419			0.92	1.28		1.38	1.319	1.891	1.35	1.29		1.7	2.21	0.75	1.849	2.48	1.2	3.22	2.92	2.36585	3	2.72			3.57	3.59	3.89	4.24	3.074	3.6634	3.18	4.85	2.64783	3.87	5.26	3.3	7.13	4.1	5.4	5.56551	5.66	4.564	4.13	6.21697	4.15	5.47	5.62
88	0.055	0.368	0.645333	0.776	1	2.42	0.524667	1.49	1.59	1.29	1.39	1.49	1.37867	1.99	2.29	2.14	2.105	2.08	1.42	2.59	2.87	3.32073	2.88	2.94	2.43867	2.36667	2.51	3.38	3.12	1.26	3.238	2.5024	3.8	3.52	3.41522	3.63	3.27	5.41	6.41	3.88	4.78	4.84951	3.71	4.849	4.76	6.72609	6.74	7.14	6.64
102	0.1	0.9335	0.259667	0.834667	0.95		1.34567	1.46	1.521	1.244	1.24	1.67	1.527	2.23	2.16	3.15	2.836		3.26	2.18	2.15		2.24	3.24	3.128	2.08967	3.04	4.04	4.03	3.33	4.038	3.439	2.51	3.57	4.62174	3.18	4.77	4.24	2.94	4.02	6.42	4.96993	2.39	5.78	5.41	5.66941	5.07		7.62
104	0.057		0.747	0.381	1.02		0.55	1.61	0.971	0.798	1.71	1.52	1.67267	2.07	2.44	2.42	2.6	1.16	3.15	2.97	3.44	1.85122	3.54	2.93	2.824	2.499	2.77	2.59	3.09	1.15	3.954	1.9632	4.53	3.67	3.12391	4.22	4.37	3.55	5.28	4.6	3.42	4.51962	2.44	5.58	5.34	4.7231	6.38	2.8	8.8
105	0.007	0.545	0.684	0.896333	0.77		1.51633	1.07	1.339	1.394	1.59	1.06	1.23433	1.55	1.92	2.19	1.957	1.43	2.04	1.56	2.27	1.66707	2.2	3.12	2.99	2.51933	3.75	3.97	2.86	3.54	3.011	3.2616	2.98	1.87	2.92826	3.44	3.74	4.02	4.59	4.48	3.96	5.1125	4.11	4.87	5.98	4.41911	5.61	7.63	7.09
144	0.073	0.4265	0.588333	0	0.81	0.2	0.137	1.2	1.45	1.04	0.47	1.37	1.30833	1.65	1.51	1.33	2.357	1.31	1.03	1.31	2.17		2.13	1.66	2.942	1.65533	1.47	2.94	2.29	3.2	1.77	2.5386	1.17		2.75652	1.74	3.31	1.3	$0.6	4.52	3.44	4.13712		3.09	2.7	4.37752	2.95		4.88
Mean 10 ELWL	0.0524	0.524111	0.576185	0.533889	0.873	1.265	0.94563	1.305	1.319	1.2784	1.279	1.351	1.37244	1.77	1.822	1.76444	2.1767	1.94	1.801	2.147	2.389	2.05139	2.404	2.525	2.7697	2.47619	2.744	3.195	2.81444	3.346	2.8219	2.90424	3.185	3.32	3.16174	3.097	4.004	3.174	4.37111	4.052	4.478	4.31158	4.55667	4.4595	4.251	4.65289	4.64	5.98	6.037
Ratio !0/lowest 10	2.31107	1.31766	1.12721	1.95401	1.06873	0.53642	1.74941	1.08659	1.12341	1.23635	1.2455	1.14286	1.22938	1.11864	1.03293	1.3296	1.00979	1.2489	1.66019	1.21053	1.03181	1.31414	1.09359	0.969505	0.966556	1.21444	1.04045	0.967762	1.18993	1.09444	1.15656	1.18624	1.08289	1.15331	1.22442	1.34001	0.951548	1.26654	1.07867	1.10192	1.03707	1.03168	0.960985	1.07976	1.25641	1.14499	1.275	1.02819	1.13136
																																								M103+N103+O103+Q103+V103+X103+Z103+AA103+AB103+AC103+AD103+AI103+AK103+AM103+AS103+AT103+AX103+BA103+BB103
																																1.544	1.68726	1.98	2.346	2.465	2.629	2.67707	3.00719	2.855	3.092	3.349	3.829	4.15	4.02	4.8152	5.341	6.83	4.39059
																																1.06825	1.17012	1.04335	1.10032	1.00339	1.04207	0.975928	1.06084	0.955534	1.0183	1.05892	1.07541	1.11719	1.01459	1.04332	1.15294	1.03061	1.02845
																																1.351	1.37244	1.77	1.76444	2.389	2.404	2.7697	2.47619	2.744	3.195	2.81444	3.32	3.097	3.174	4.4595	4.251	6.037	3.57395
																																1.14286	1.22938	1.11864	1.3296	1.03181	1.09359	0.966556	1.21444	1.04045	0.967762	1.18993	1.15331	1.34001	1.26654	1.07976	1.25641	1.13136	1.2285
																																								D121+E121+F121+G121+H121+I121+K121+L121+U121+AD121+AE121+AF121
																																							0.649481	1.04322	0.933	0.678571	1.6543	1.418	1.58056	1.593	2.599	3.349	3.662
																																							0.973358	1.33022	1.0242	0.655956	1.31349	1.02524	1.14955	1.13093	1.08136	1.05892	1.17569
																																							0.576185	0.533889	0.873	1.265	0.94563	1.305	1.2784	1.279	2.147	2.81444	3.346
																																							1.12721	1.95401	1.06873	0.53642	1.74941	1.08659	1.23635	1.2455	1.21053	1.18993	1.09444
[truncated: 68 more columns]

## Sheet: ELWLW 0-3h 2008+F-W plots
			New	New			New						New												New	New
CSDH	Yield/plant_S_Spain99	GrWt/plant/NFF_1994	Yield	dYield 2012	Yield/pl_droughted_Zaj06	Grain_wt/plant_rain_Kaz00adj	dYield 2011	Yield/pl_mn_Droughted_Zaj05	Diff_ear_dwt_SUSTExp2	moddrought_Yield/plant_T14_Krakow08	Yield/plant_sev_dr_Krakow10	Yield/pl_control_Zaj06	cYield 2013	Yield/pl_mn_Rainfed_Zaj05	GrainYd/plant_(Ht_adj)_N1_97	cont_Yield/plant_T35_Krakow08	Regr_adj_Yd/plant_Zaj02	Grain_yd/plant_irrig_Kaz00	Yield/plant_M_Spain99	Yield/plant_sev_drought_Krakow07	Yield/plant_rainfed_Zaj01	Grain_wt/plant/GH/1994	Yield/plant_irrig_Zaj01	GrainYield/plant_N2_97	cYield 2011	cYield 2012	GrainYd/plant_(Ht_adj)_N3_97	Yield/plant_cont_Krakow10	Yield/plant_mod_drought_Krakow07	Grain_yd/plant_A_Kaz98	Yield/plant_rain_Zaj00	Consel 2003(50pl/row)	Vern_Total_yield/pl_Krakow06	Yield/plant_control_Krakow07	Grain_wt/plant/Mor_1994	75ppb_Mn_Grain_wt/pl_03	GrainYd/plant_(Hr_adj)_N1_98	NFA_Mn_Grain_wt/pl_03	Non-vern_Total_yield/pl_Krakow06	GrainYd/plant_(Ht_adj)_N2_98	Conselice_Yield/plant_04	Yield_g/plant_adj(2,80)_Idice03	Grain_yd/plant_B_Kaz98	Yield/plant_irrig_Zaj00	GrainYield/plant_N3_98	Idice_Mn_Yield/plant_13%_04	Total_yield/plant_75ppb_05	Grain_yd/plant_A_Kaz99	Total_yield/plant_NFA_05
Mean	0.10375	0.652566	0.665461	0.810144	0.914526	1.00081	1.29895	1.38747	1.39001	1.39573	1.42819	1.45558	1.46676	1.90537	1.92421	2.1556	2.20612	2.26689	2.414	2.42426	2.45568	2.47	2.53432	2.63168	2.7365	2.85196	2.98116	3.04234	3.18269	3.19613	3.22173	3.25	3.52191	3.59	3.61	3.76682	3.86095	3.97202	4.081	4.34189	4.42	4.437	4.57978	4.64389	4.71242	4.96578	5.53	6.37733	6.64989
1	0.23	0.4505	0.521333	0.617	0.8	1.21	1.835	1.14	0.87	1.568	1.38	1.48	1.28067	1.63	2.15	2.74	1.796	3.05	4.03	3.51	1.96	1.96951	2.13	2.37	2.53367	3.38633	2.69	2.63	2.1	3.03	2.875	3.58	3.3	3.32	2.88696	3.73	1.93	3.71	4.16	3.81	3.7	4.3129	2.18	3.231	4.68	4.58993	3.81	8.23	5.83
2	0.272	0.7545	0.591	1.577	0.87	0.28	1.96833	1.38	1.091	1.552	2.38	1.58	1.97033	1.93	1.64	2.04	1.43	2.6	4.97	2.62	2.19	2.51829	2.39	2.47	1.62667	2.83067	2.92	3.29	2.68	4.48	3.482	3.0118	2.82	3.84	3.5413	3.33	2.85	2.62	3.9	4.02	4.86		2.92	4.965	4.8	4.87399	6.39	9.2	7.22
3	0.036	0.4005	0.727667	0.489333	0.92		1.10467	1.41	0.954	1.351	0.49	1.53	1.601	2.17	1.59	2.55	2.873	1.46	1.38	2.1	2.78	2.15122	2.75	2.72	3.99867	3.323	2.17	3.04	4.1	3.76	2.795	3.0752	3.37	3.3	3.35217	2.76	5.35	3.33	2.49	5.99	5.58	5.99969	4.86	5.222	4.54	5.12926	5.05	5.52	6.93
4	0.107	0.636	0.434	0.913667	0.81		1.59167	1.19	0.891	1.861	1.86	1.4	1.78067	1.84	1.93	2.14	1.865		2.5	3	2.01		2.28	2.26	3.74933	3.34567	2.54	2.86	3.19	3.37	3.154	3.9092	3.02	3.1	2.7413	2.73	3.08	2.24	2.12	3.36	2.7	3.65657	1.77	5.892	6.75	3.76945	4.49		3.76
5	0.06	0.696	0.718667	0.560333	0.98	0.82	1.40633	1.41	2.079	1.464	1.27	1.45	1.562	1.73	1.62	3.21	2.585	1.92	1.19	2.87	2.1	3.20488	2.29	2.53	2.56833	3.288	2.77	3.49	4.95	7.34	3.27	3.393	6.43	5.25	3.7413	4.48	2.9	5.18	7.46	3.17	4.16	3.9775	6.14	4.23	3.89	7.31431	7.83	3.84	8.12
7	0.121	0.841	0.804	0.456333	1.14		1.61433	1.55	1.93	1.582	1.36	1.63	1.67567	1.97	1.67	2.1	1.75		1.1	2.66	2.84		2.96	1.64	2.44467	2.23333	2.81	3.66	3.62	2.84	3.82	3.5108	2.22	2.91	4.57826	4.92	4.51	3.45	4.5	5.44	7.1	4.74423	3.4	4.548	3.75	5.64566	5.44		6.34
8		0.72	0.818333	0.629	1.09	0.59	1.857	1.45	1.635	1.745	0.9	1.65	1.38633	1.98	1.91	2.65	2.292		1.68	2.61	3.13	2.79512	3.08	2.48	3.53733	4.328	3.57	2.65	4.43	2.13	3.292	3.4404	4.17	3.71	3.42174	6.26	3.24	5.38	1.67	3.52	5.56	5.23404	9.22	4.41	4.54	5.8574	6.48	6.3	8.29
9	0.032	0.8725	0.835	0.454	1.06	0.46	1.143	1.7	1.686	1.535	1.7	1.76	1.704	2.46	1.83	2.3	2.351	3.64	2.61	2.22	3.93	1.87561	3.85	2.16	3.006	3.17767	2.64	2.27	2.35	1.18	2.96	4.0558	3.03	3.8	3.41957	4.73	4.78	5	5.74	4.92	4.52	4.70521	5.88	4.818	7.49	4.48623	6.75	6.26	6.2
10	0.015	0.9375	0.86	0.0413333	1.02	0.31	1.45133	1.51	1.709	1.349	1.64	1.63	1.694	2.35	2.72	2.52	2.839	1.6	1.69	1.46	2.93	3.62195	3.16	3.6	2.874	2.21533	4.27	1.42	3.8	5.16	4.269	4.7688	2.37	3.96	3.76087	4.6	4.84	4.14	5.73	5.23	5.72	4.46791	6.6	6.965	5.06	4.60256	6.9	5.07	7.71
11	0.135	0.5825	0.403	0.654333	0.85	0.72	1.28433	1.48	1.28	1.235	1.36	1.55	1.42767	2.04	1.77	2.76	1.469	1.13	1.99	2.81	2.86	1.7	2.81	2.74	3.124	2.71533	3.77	2.5	3.95	3.94	2.631	4.7336	2.27	4.75	3.55217	3.73	4.03	3.72	5.12	4.09	3.66	3.54706	5.07	4.685	5.34	3.77902	4.54	5.19	5.64
12	0.147	0.34			0.95	0.62		1.52	1.52	1.31	1.36	1.53		1.92	1.82	1.6	2.803	2.2	4.27	1.78	2.12	2.52927	2.35	2.14			2.82	2.9	4.12	3.36	3.582	1.99	3.37	4.39	5.17174	5.11	3.86	5.67	3.28	4.14	5.64	5.48299	6.35	4.825	4.85	7.60159	6.12	6.56	6.5
13	0.316	1.026	0.673333	0.989667	0.89	1.3	1.97733	1.31	1.15	1.783	2.03	1.34	1.82933	1.96	2.23	1.56	3.47	3.53	0.94	2.75	2.54	3.28415	2.51	2.81	2.4	3.29833	5.16	3.05	3.62	2.83	3.183	3.0824	4.18	5.2	4.32391	5.26	3.72	4.77	2.75	4.64	3.16	5.22546	3.91	4.822	4.41	5.88681	6.13	8.35	7.04
15	0.113	0.5495	1.02067	1.67433	1.2	0.26	1.64533	1.58	1.705	1.31	1.39	1.66	1.6	2.16	1.46	2.25	2.054	1.11	3.3	2.35	2.83	1.86098	2.86	2.41	2.63867	2.608	2.7	2.45	2.94	2.83	3.55	3.7138	3.26	3.13	4.13913	3.55	4.93	5.3		4.54	4.58	5.0598	6.24	4.972	4.63	5.05517	6.74	4.82	7.32
16	0.088	0.33			0.93	0.84		1.33	1.215	1.684	1.7	1.18		1.72	1.92	2.39	1.997	2.37	1.41	2.71	2.86	1.83293	2.83	2.38			3.12	3.97	2.18	2.63	2.243	3.335	4.56	3.22	4.11304	5.23	1.87	5.52	3.55	2.81	2.22	3.48927	6.29	3.844	3.38	3.59811	6.01	3.99	8.17
17	0.033	0.5015	0.617	0.76	0.97	0.72	1.18967	1.44	1.39	1.092	1.37	1.4	1.75467	1.91	1.96	1.18	1.838	2.37	1.87	2.17	2.56	2.69634	2.56	2.47	2.25533	2.31233	3.35	2.82	3.13	2.73	2.167	3.7696	3.64	3.89	3.72609	5.42	4.38	4.98	3.53	6.59	3.94	4.28652	6.18	3.085	7.28	5.31836	5.29	5.56	6.94
18	0.207	0.786	0.397	0.853667	1.24	2.98	1.41867	1.62	2	1.501	1.16	1.71	1.821	2.16	2.68	1.93	3.069	1.98	1.68	2.15	3.4	2.84268	3.75	4.05	3.69733	3.94467	4.33	3.37	4.13	4.49	3.648	4.4896	4.58	4.91	3.7	4.09	4.2	2.73	4.47	5.18	4.1	5.75226	3.21	5.281	5.29	4.75296	4.4	6.43	6.82
19	0.09		0.621	1.62767	0.86	1.5	1.76433	1.33	1.019	1.287	1.34	1.43	1.36733	1.84	2.15	2.21	1.989	2.35	2.95	1.86	2.02		2.29	2.9	3.24467	3.12233	2.11	3.14	3.51	3.76	3.881	3.4462	2.88	3.27		3.88	2.94	5.18	3.03	5.75	5.18	4.28518	4.6	5.48	3.38	5.36436	5.98	5.62	7.38
20	0.124	0.6275	0.980667	1.48067	1.01	0.47	1.31267	1.58	1.077	1.155	1.93	1.56	1.81767	2.11	2.62	2.28	2.569	2.2	3.09	3.59	2.91	3.25	2.97	3.53	2.53233	2.31833	3.77	3.48	3.26	2.24	3.8	4.6176	4.97		3.98913	4.47	3.83	5.03		5.49	3.86	5.44696	2.62	4.676	6.52	5.9214	5.46	6.11	7.68
21	0	0.8675	0.822667	0.811	0.85	1.6	0.541667	1.4	1.83	1.653	1.53	1.53	1.46433	1.98	2.35	2.02	2.014	2.49	1.13	2.47	2.74	3.34146	2.8	3.01	2.053	2.99833	3.21	2.92	3.02	1.91	2.704	3.3638	5.48	2.49	4.38478	4.63	3.02	4.38	7.15	3.73	2.92	4.04284	5.46	4.223	3.85	5.21892	5.66	7.39	6.21
22	0.097	0.7875	1.04567	0.532667	1.17	1.29	1.37567	1.55	1.565		1.51	1.82	1.647	2.01	2.63	1.74	2.042	2.1	3.01	2.16	2.99	2.61829	2.93	3.07	3.88267	3.606	4.44	3.12	2.55	3.94	2.964	3.2696	3.04	4.09	3.80435	5.39	6.57	4.41	4.36	6.23	6.16	4.69	4.2	4.596	5.71	6.66022	6.02	7.11	7.01
23			1.01933	1.28133	0.95	1.13	1.465	1.53	1.56	1.828	1.37	1.53	1.59433	1.96	2.18	2.96	2.988	2.21	1.56	2.24	2.97	3.58293	3.24	3.89	3.50733	3.069	3.64	2.21	2.51	2.66	3.31	3.6556		2.44	3.31739	4.09	4.98	4.42	4.62	4.59	4.6	6.39327	7.94	3.81	6.86	4.17462	6.95	8.93	7.26
24	0.211	0.482	1.35667	0.843	1.1	1.11	1.81167	1.59	1.529	1.837	1.57	1.72	2.081	2.25	1.7	1.78	2.652	3.33	2.63	3.35	3.4	2.52317	3.4	2.95	3.68367	4.16067	3.68	3.16	4.47	4.28	3.458	4.7666	2.89	5.29	4.55	3.65	5.26	2.73	5.46	4.31	4.46	4.63479	5.04	5.401	6.47	4.85885	6.86	10.76	6.78
25	0.061	0.786	1.041	1.54933	0.9		1.15267	1.44	1.08	1.687	1.27	1.47	1.86	1.93	1.59	2.23	3.231		2.03	2.12	1.57		1.93	1.91	3.77533	3.764	1.75	3.69	2.95	1.15	3.065		2.91	3.64	1.31304	2.98	2.6	3.31	2.06	3.99	4.62	4.90278	1.15	4.869	4.65	4.45915	5.87		6.06
26	0.177	0.934	0.661667	3.37167	0.85		2.27233	1.36		2.004	1.97	1.58	2.04067	2.03	1.61	1.99	1.431		5.49	3.05	2.04		2.07	2.24	2.864	3.90033	2.51	4.44	2.93	2.3	2.354	2.7438	3.32	2.98	4.88478	2.66	5.31	2.79	3.88	4.98	3.3	3.30443	1.8	3.395	7.12	5.89266	4.98		7.45
27	0.042		0.716	0.515667	1.03	0.52	1.126	1.39	0.989	1.387	1.57	1.26	1.06867	1.77	1.51	1.49	2.318	2.92	3.21	2.23	2.4	2.37927	2.54	2.03	2.42533	3.40533	2.45	2.62	3.61	2.92	2.621	2.8182	3.82	3.59	3.64565	4.03	3.99	3.89	3.42	3.53	3.62	3.48089	4.31	3.154	4.55	4.04054	5.62	7.38	6.27
28	0.24	0.688	0.786	1.24367	0.91	0.92	0.207667	1.43	1.211	0.616	1	1.42	1.765	1.82	1.63	1.34	2.005		5.51	2.29	2.55	1.87805	2.55	3.37	3.03133	1.53333	1.36	2.43	2.17	3.78	3.271	3.0662	2.73		5.84565	2.66	4.27	3.29	3.83	6.09	4.98	5.12523	4	5.305	6.11	6.10168	4.43	3.69	4.72
29	0.017	0.69	0.325	0.830333	0.97		1.10933	1.4	0.915	1.483	1.85	1.34	1.133	1.73	1.7	1.39	2.515		2.37	2.6	2.61		2.59	2.58	2.24	2.39033	3.96	2.13	3.48	3.94	3.256	3.369	3.29	4.17	3.73261	1.82	4.27	2.78		5.21	3.7	3.78851	3.68	4.751	6.48	3.74962	5.72		5.6
32	0.141	0.878	0.549667	0.728333	0.95	0.59	1.703	1.59	1.585	1.513	1.15	1.55	1.66667	2.09	1.97	1.97	5	1.86	3.12	2.93	2.4	1.84634	2.61	2.37	3.22033	2.66733	2.77	3.58	3.83	5.31	3.829	3.5294	4.92	2.94	4.5587	4.66	3.98	4.48	4.16	4.53	2.58	5.15443	4.82	4.963	4.27	5.16812	6.59	5.1	7.3
33	0.187	0.8945	0	0.333333	0.98	1.83	2.06167	1.61	1.445	1.493	1.91	1.67	1.502	2.36	2.55	2.55	1.976	4.04	3.31	2.86	2.46	2.77439	2.54	2.8	2.52367	3.07233	3.22	2.84	3.97	5.72	3.708	3.2324	1.89	4.16	4.15217	3.99	4.38	3.86	4.39	4.14	3.24	3.48416	5.57	4.323	3.97	5.42744	5.38	10.44	6.72
34	0.158	0.6125	0.559333	0.479667	0.84	0.67	0.642333	1.26	1.299	1.581	1.03	1.31	1.201	1.61	1.59	1.91	1.018	2.32	2.5	1.93	2.88	2.02195	2.89	1.9	2.69933	2.41033	2.58	2.67	2.38	1.84	2.355	2.7458	3.54	2.12	1.73913	2.28	2.72	2.94	5.31	3.57	3.24	3.75713	2.93	4.607	2.93	3.33536	4.97	4.13	4.7
35	0.028	0.5425	0	0.674	0.86	1.24	0.922	1.29		1.397	1.43	1.39	0.87	1.73	2.26	1.75	1.784	1.55	0.56	2.21	1.73	2.73902	1.93	1.85	2.078	2.055	2.31	3.52	2.77	3.1	2.469	3.3914	3.15	2.96	2.27391		3.06		4.52	3.37	4.84	4.89862	2.55	2.727	3.06	4.85257	4.99	5.68	5.46
36	0	0.587	0.297333	0.201	0.96	0.1	0.424667	1.34	1.345		1.26	1.51	0.871	1.72	2.04	1.9	1.792		1.11	2	3.01	1.20976	2.97	2.91	2.88633	2.598	2.98	2.52	2.58	3.48	2.374	3.428	3.39	2.79	3.80652	2.05	5.57	2.33	2.45	4.55	3.48	3.48354	4.94	3.803	4.46	3.83419	4.43	6.75	6.33
37	0.136	0.696	0.701333	0.566667	0.88	1.44	0.505	1.3	1.45	1.346	1.31	1.37	0.854667	1.71	1.84	1.76	1.508	1.94	0.93	2.09	2.66	1.4622	2.57	2.5	2.51467	2.81167	3.59	2.33	2.19	5.22	2.61	3.3076	3.36	2.5	2.64565	3.28	3.56	4.55	4.43	3.83	3.86	4.72012	10.84	4.409	4.34	4.59078	5.79	5.45	5.71
38	0.061	0.566	0.152667	0.399333	0.72	0.93	0.959667	1.06	1.33	1.4	1.36	1.24	1.25633	1.52	1.17	0.88	2.201	2.05	1.73	1.39	1.55	1.54634	1.49	1.66	1.992	2.447	2.13	2.6	1.58	4.88	1.843	3.0526	2.01	1.62	2.85435	1.59	2.51	1.08	2.94	1.86	4.68	3.2946	4.3	3.728	2.15	2.61553	1.74	4.49	3.96
39	0.093	0.693	1.36333	0.649333	0.84	0.86	1.37133	1.39	1.375	1.702	1.62	1.5	1.59567	1.84	2.31	1.47	1.412	2.41	2.91	2.76	2.18	3.05488	2.32	4.09	2.35867	2.867	2.87	3.32	3.27	3.09	3.88	2.7348	4.75	2.68	3.30652	5.62	3.73	4.69	3.71	4.03	4.42	3.95446	4.74	4.025	3.24	6.20766	6.04	6.22	7.87
40	0.143	0.47	0.662	0.478667	0.72	0.3	1.412	1.02	1.09	1.19	1.75	1.14	1.18567	1.41	1.89	1.34	1.51	1.01	1.82	2.16	1.59	2.67317	1.53	2.46	2.23	2.02567	3.4	2.41	3.27	2.46	1.8	2.7388	2.76	2.5	4.07826	2.44	2.39	2.52	2.68	2.58	2.92	3.95261	3.58	3.513	2.82	3.6314	3.55	3.54	5.26
41	0.069	0.325	0.602	0.0983333	0.86	0.12	1.39033	1.43	1.215	1.177	1.2	1.37	1.457	1.89	1.35	1.15	1.764	3.17	3.8	1.25	2.73		3.05	1.17	2.824	1.63033	1.6	2.68	2.47	4.24	2.73	2.5958	1.26	1.75	2.83043	0.99	5.2	1.33	0.56	7.02	4.06	2.5103	3.08	4.468	5.64	3.67989	4.96	3.86	3.6
42	0.008	0.335	0.847667	0	0.81		1.26567	1.17	0.901	1.349	0.85	1.27	1.73133	1.63	0.91		2.2		0.66	1.45	1.85		1.94	1.4	2.01833	2.25533	1.87	2.57		4.96	1.811	2.1464	3.01	3.51	3.39783	2.49	3.85	1.66	0.23	4.35	3.4	1.98437	1.15	3.418	3.04	3.16852	2.4		3.42
44	0.018	0.419			0.92	1.28		1.38	1.319	1.891	1.35	1.29		1.7	2.21	0.75	1.849	2.48	1.2	3.22	2.92	2.36585	3	2.72			3.57	3.59	3.89	4.24	3.074	3.6634	3.18	4.85	2.64783	3.87	5.26	3.3	7.13	4.1	5.4	5.56551	5.66	4.564	4.13	6.21697	4.15	5.47	5.62
45	0.1	0.7105	0.593	1.04967	0.82		1.65567	1.26	1.6	1.368	0.93	1.51	1.52833	1.8	1.77		1.139		2.79	2.19	1.76		1.92	2.44	2.57833	2.931	2.89	2.26	2.89	4.96	3.541	3.8778	5.2	3.48	4.55435	2.52	2.82	4.32	2.78	4.24	2.32	3.18281	3.92	4.636	3.16	5.49529	5.45		7.03
46	0.113	0.9125	0.806667	0.747667	0.89	0.53	1.64967	1.42	1.68	1.325	1.19	1.36	1.46667	1.8	2.62	2.45	1.567	2.51	2.13	3.13	1.69	3.45976	1.74	3.28	2.393	3.49967	3.56	2.93	3.88	1.68	3.526	2.6952	4.62	3.61	3.6587	6.05	3.26	5.42	4.8	4.07	5.12	3.94689	8.07	4.547	4.52	5.60503	6.76	8.15	8.59
47	0.319	0.7645	0.728333	0.522333	0.81	1.12	1.185	1.28	1.606	0.835	1.22	1.26	1.41167	1.71	1.54	1.52	2.166	1.73	3.01	1.37	2.32		2.4	2.19	2.44833	2.52067	2.38	2.99	1.98	4.96	2.511	4.5988	1.59	1.93	2.73913	1.41	4.46	1.43	2.87	5.64		4.81501	2.49	3.371	4.92	3.9696	3.24	4.26	4.6
50	0.062	0.4545	0.941667	0.409333	0.94	0.47	0.755	1.48	1.09	0.928	1.18	1.48	1.123	1.9	1.36	2.5	2.156	2.3	1.95	2.45	2.7	2.7	2.87	1.61	1.93	2.438	2.23	2.44	3.28	3.48	2.419	3.1034	3.57	3.23	4.41304	1.72	4.63	3.7	3.51	5.95	3.7	4.11155	6.49	3.292	4.74	4.82998	9.57	7.22	5.79
51	0.044	0.6965	1.34933	0.411	0.88	0.31	1.932	1.47	1.519	1.325	1.19	1.58	1.703	2.1	2.52	2.22	2.027	3.32	1.43	2.58	2.18	3.41585	2.24	3.19	2.47633	2.94933	3.53	3.95	3.54	3.1	2.656	2.7754	4.34	4.51	5.31522	3.87	3.61	5.12	4.62	4.09	4.96	3.79341	5.17	3.336	5.28	5.25232	5.89	7.78	9
52	0.068	0.7405	0.915667	0.914	0.93	2.46	1.271	1.5	1.575	1.462	1.68	1.42	1.67933	1.87	1.99	1.85	1.65	2.56	2.73	2.36	2.09	2.90732	2.09	3.01	2.42767	3.39333	3.1	2.8	3.34	2.02	3.934	3.3846	4.22	4.23	3.61739	4.52	3.44	4.03	4.16	4.08	4.7	4.68847	6.53	4.92	4.48	5.65324	6.89	6.17	7.11
55	0.063	0.6665	0.61	0.486667	0.75		1.50567	1.27	1.525	1.385	1.26	1.44	0.968	1.83	1.99	1.25	1.608		2.95	1.98	2.16		2.15	2.83	3.111	2.44333	2.94	1.96	3.59	3.11	2.873	2.9238	2.88	3.37	3.31739	3.02	3.42	3.93	1.58	4.66	3.64	2.91278	2.65	4.553	4.3	5.58329	3.99		6.07
56	0.134	0.926	0.718333	0.697667	0.77	1.12	1.019	1.32	1.35	0.846	1.28	1.55	1.613	1.94	2.99	2.24	1.282	2.01	2.84	3.31	2.22	3.44024	2.31	2.87	2.43467	3.489	4.49	3.29	3.86	3.86	3.536	3.0094	3.35	4.38	5.11304	4.66	4.2	5.06	4.41	5.44	4.1	5.63866	7.2	5.311	4.69	6.49488	7	9.52	7.9
57	0.152	0.3965	1.523	0.974	0.9	1.34	1.33633	1.39	1.014	1.074	1.87	1.45	1.65433	1.94	2.04	1.45	2.371	1.86	0.94	1.95	2.84	2.71341	3.03	2.24	2.28167	2.81333	1.91	2.84	3.89	2.97	3.129	3.7096	2.56	4.66	4.27391	4.65	3.51	4.69	4.61	3.3	4.32	4.48291	8.36	5.261	4.56	5.98191	7.17	5.97	7.95
58	0.253	0.809	0.655333	1.345	0.97	1.52	2.061	1.53	1.42	1.837	1.64	1.67	1.55733	2.22	2.16	2.89	2.756	3.47	3.99	2.97	2.73	2.40732	2.83	3.3	2.397	2.41967	3.51	3.71	3.82	2.95	4.338	3.6502	4.92	4.08	4.12609	4.66	4.61	5.69	3.72	4.11	6.58	4.29138	7.31	5.605	4.91	6.66661	7.34	9.9	8.81
59	0	0.3365	0.860333	0.756	0.64	0.48	0.599	0.93		1.472	1.21	0.95	1.46733	1.17	1.47	1.94	1.398	1.65	3.22	2.78	1.14		1.36	1.79	1.78933	2.55067	2.52	2.5	2.53	3.83	3.346	2.7812	1.9	2.89	2.82826		2.37		3.75	2.18	5.72	3.23484	3.83	4.975	2.64	5.50334	4.72	6.96	4.87
60	0.062	0.3985	0.717667	0.716333	0.94	2.13	1.71933	1.45	0.905	1.537	1.68	1.48	1.60567	2.04	2.63	2.28	1.998	1.75	3.83	2.6	2.48	2.70366	2.5	2.22	2.097	2.134	3.63	2.85	3.12	3.6	3.664	2.8068	5.28	2.72	5.06087		2.77		4.41	2.99	4.14	3.65329	6.04	4.628	2.54	5.12152	5.61	4.01	6.07
61	0.135	0.709	0.333667	1.02833	0.72	1.26	1.04	1.26	0.99	0.935	1.62	1.4	1.026	1.81	1.79	1.66	1.287	2.48	2.38	1.84	2.99	2.45976	2.99	3.24	1.54333	3.15767	3.01	2.81	2.51	3.29		2.1888	6.07	2.69	3.65652	4.04	3.12	3.39	3.78	3.8	5.02	5.20903	4.7		5.23	4.75809	6.06	6.1	6.28
62	0.019	0.71	0	0.838333	1.02	1.19	0.971667	1.5	1.611	1.167	1.44	1.62	1.02167	2.07	1.8	2.08	1.796	2.44	1.62	2.64	2.4	2.64878	2.59	2.59	2.90567	3.37633	3.27	3.26	2.61	3.98	3.588	2.0826	3.05	3.18	3.55217	3.86	4.54	4.42	1.56	5.18	4.94	4.73979	10.03	5.947	4.42	5.30714	4.72	7.1	6.22
63		0.68	0.569667	1.29767	0.83	0.22	0.796333	1.35		1.345	1.56	1.45	2.07533	2.08	1.77	2.88	3.75	1.87	1.31	1.91	2.41	2.98659	2.75	2.7	2.559	2.74233	3.37	2.58	4.01	2.38	1.853	3.506	2.93	4.21	2.63478	4.22	3.3	4.09	4.48	3.64	4.36	4.65117	2.62	3.532	3.85	5.72352	5.97	5.08	6.96
64	0.115	0.7015	0.921333	1.07867	0.95	1.34	1.30733	1.37	0.985	1.658	1.61	1.33	1.51667	1.95	2.17	3.06	1.851	2.13	1.7	2.6	2.71	2.59756	2.73	2.86	3.31733	3.08867	3.25	2.71	2.4	2.09	3.508	3.7104	2.94	2.29	4.33478	4.52	4.28	3.72	4.24	4.15	4.78	4.49007	5.28	5.609	4.95	5.932	4.17	6.74	6.15
65	0.083	1.0225	0.817333	1.838	1.06	1.77	0.793667	1.58	1.475	1.379	1.98	1.41	1.50133	1.98	1.76	2.97	3.418	1.77	2.12	1.62	2.08	$0	2.18	2.91	1.92767	2.77267	3.73	3.32	3.74	4.05	4.003	2.9952	4.75	3.83	4.13261	4	3.54	5.61	4.51	4.89	3.86	4.39131	3.71	4.4	4.97	4.53938	6.21		7.25
66	0.077	0.6465	0.324333	0.66	0.91	2.23	1.76567	1.39		1.275	1.6	1.25	1.53067	1.96	2.39	2.7	2.766	2.41	1.74	2.03	3.17	2.51951	3.14	3.3	3.68667	4.413	3.3	3.68	3.31	4.68	4.064	2.2626	2.3	3.74	4.46087		3.82	5.55	3.24	5.22	4.7	3.47578	6.26	5	5.94	6.59862	6.48	6.32	8.99
67	0.348	0.775	0.506667	0.648	0.71	0.99	1.72967	1.24	1.075	1.405	1.07	1.36	1.529	1.66	2.11	2.76	1.448	2.17	3.43	2.81	2.37	2.81463	2.4	2.17	2.719	2.68	2.43	3.35	3.15	2.48	3.518	3.1558	4.38	3.18	3.36304	4.6	3.13	5.21	3.75	3.69	4.02	3.85249	2.95	4.442	4.6	4.15485	5.97	4.69	7.36
69	0.054	0.743	0.723333	1.96967	0.99		1.84367	1.54	1.219	1.321	0.96	1.44	1.59233	2.03	2	1.64	3.569		1.58	2.86	2.66	0	2.62	3.29	3.54	3.10167	2.46	2.6	2.72	3.34	3.028	3.4966	2.82	3.85	4.0587	3.7	3.9	4.9	3.08	5.43	4.08	5.66044	1.6	3.811	5.7	5.11739	3.21		7
70	0.221	0.5635	0.662667	0.933	0.83	0.68	1.28667	1.29	1.095	2.058	2.06	1.12	1.34933	1.64	2.16	2.12	2.228	2.47	1.85	2.57	1.79	2.38902	2.03	3.18	1.892	2.70367	3.15	3.25	2.45	2.41	3.74	3.629	3.45	3.02	2.51522	4.65	1.89	5.27	3.69	2.3	3.3	3.62998	5.98	4.877	3.52	4.17901	3.9	4.79	6.24
72	0.095	0.452	0.414667	0.792333	0.74	1.22	1.09733	1.12	1.386	1.727	1.37	1.03	1.27867	1.43	1.69	2.38	1.82	1.43	1.79	1.79	2.1	1.9	2.08	1.98	2.105	2.768	2.35	3.16	1.98	1.48	2.53	3.7254	4.67	2.43	3.41522	4.34	2.33	4.35	5.88	2.24	4.34	3.96407	3.8	3.889	2.23	3.08222	4.24	6.17	6.23
80	0.143	0.5805	0.473667	0.45	0.89		1.02567	1.34	1.446	1.063	1.5	1.47	1.232	1.84	1.63	2.27	2.28		0.92	2.45	2.32	1.89024	2.26	2.95	2.92167	2.74567	2.29	3.45	2.05		3.129	2.308	2.79	3.18	3.12174	2.98	4.4	2.99	3.23	4.03	3.26			5.483	4.46	2.97533	4.21		5.56
86	0.11	0.5515	0.272667	0.771667	1.23	1.5	1.04133	1.54	1.46	1.431	0.86	1.66	1.44933	2.03	1.76	2.59	1.723	2.14	2.23	2.37	2.85	2.26951	2.81	2.93	2.76333	3.20733	3.21	2.38	2.07	2.5	2.36	2.5196	2.4	3.87	2.76304	3.41	3.04	4.19	3.95	3.3	4.54	4.46722	2.93	3.706	3.4	5.16634	4.43	5.93	6.16
87	0.075	0.659	0.927333	0.82	1.06	0.52	1.245	1.55	1.7	1.588	1.5	1.77	0.948	2.28	1.76	2.18	2.887	1.61	2.6	2.82	3.06	1.91707	2.8	3.29	3.62167	3.01867	3.06	3.16	2.98	1.27	4.53	3.7874	1.74	3.28	4.75652	3.13	3.45	3.95	7.31	3.5	4	4.37787	5.67	5.368	4.16	4.82717	5.23	6.23	7.1
88	0.055	0.368	0.645333	0.776	1	2.42	0.524667	1.49	1.59	1.29	1.39	1.49	1.37867	1.99	2.29	2.14	2.105	2.08	1.42	2.59	2.87	3.32073	2.88	2.94	2.43867	2.36667	2.51	3.38	3.12	1.26	3.238	2.5024	3.8	3.52	3.41522	3.63	3.27	5.41	6.41	3.88	4.78	4.84951	3.71	4.849	4.76	6.72609	6.74	7.14	6.64
90	0.284	1	0.969	0.107667	1.02	0.73	1.80433	1.6	2.42	1.104	1.33	1.76	1.95133	2.29	2.59	2.48	2.99	4.29	2.56	2.46	2.82	3.45366	2.89	3.23	2.80267	3.63567	4.32	3.81	4.19	1.71	5.356	3.9534	2.51	3.6	4.3087	3.87	4.56	4.8	4.91	4.66	4.48	5.74298	5.93	5.733	5	6.02485	7.95	8.47	11.03
91	0.072	0.612	0.822667	0.123667	1.03	0.25	1.18167	1.62	1.7	1.189	1.65	1.57	1.58367	2.17	2.2	1.67	2.639	3.89	1.69	2.07	3.72	1.51829	3.99	2.64	2.79033	2.77133	3.45	3.46	3.11	3.19	4.685	4.1784	5.84	4.17	2.11739		4.62		6.93	4.5	3.84	5.10172	4.31	5.134	4.57	3.9102	7.49	6.06	7.9
92	0.03	0.4645	0.325	0.217667	0.88	1.76	0.803333	1.35	1.399	1.584	1.67	1.23	0.857667	1.72	1.83	1.27	1.418	1.95	2.11	2.92	2.46	1.83415	2.4	2.38	2.10333	2.483	3.48	1.99	2.82	2.55	3.082	3.1038	3.84	3.34	2.1413	3.31	3.93	2.84	4.69	3.22	4.46	3.66045	1.56	5.156	5.2	4.88765	6.05	6.63	5.98
93	0.071	0.4825	0.634667	0.529333	1.16	0.65	1.402	1.62	1.26	1.377	1.49	1.76	1.21567	2.36	2.4	2.08	3.015	2.35	2	2.31	2.93	3.73415	2.85	2.87	2.15867	3.59233	3.71	2.22	3.53	3.33	4.643	3.5184	4.22	3.54	4.0087	3.9	2.99	4.71	4.9	3.31	3.84	4.03763	4.52	5.608	4.91	4.67829	5.94	9.02	6.72
94	0.033	0.6235	0.106667	0.0823333	0.76	0.45	0.386667	1.28	1.109	0.995	0.66	1.34	0.899667	1.78	1.69	1.71	0.731	1.02	3.42	1.76	2.17	2.58293	2.28	2.17	2.14333	2.64467	1.64	2.81	2.61	1.59	3.359	2.4722	3.55	3.53	3.48696	2.52	3.21	3.5	4.79	3.1	4.92	3.14145	5.27	4.409	5.09	5.72642	3.07	7.01	5.01
96	0.12	0.794			0.82	3.14		1.2		1.492	1.74	1.41		1.88	2.18	2.89	2.055	3.18	4.58	2.46	1.91	2.58537	2.01	2.65			4.23	2.45	2	2.14		2.9606	4.06	3.79	4.23478		4.03		5.93	3.58	4.68	4.85012	3.47	4.657	4.02	4.60331	5.67	8.13	6.96
97	0.021	0.7675	0.482333	0.369333	0.69	1.28	1.60967	1	1.365	1.413	1.13	1.38	1.30033	1.65	2.12	2.67	1.207	1.99	1.87	2.65	1.93	2.9	2	2.6	2.41767	3.24533	2.3	3.74	3.12	3.19	2.444	2.8756	3.36	3.99	1.49565	4.77	3.65	5.34	4.92	3.44	2.82	3.55923	8.2	3.797	3.85	6.2858	6.59	2.9	6.67
98	0.411	1.0495	0.609333	2.35733	0.79		1.95433	1.18		1.456	1.47	1.48	2.134	1.9	1.3	2.91	2.014		3.22	2.99	1.86		1.98	1.5	2.89967	2.93367	2.3	4.24	3.85	2.55	3.086	2.5708	3.31	4.6	3.6413	3.24	2.88	3.57	1.21	4.2	2.9	5.09316	$0.55	4.577	4.97	5.49017	6.95		6.5
102	0.1	0.9335	0.259667	0.834667	0.95		1.34567	1.46	1.521	1.244	1.24	1.67	1.527	2.23	2.16	3.15	2.836		3.26	2.18	2.15		2.24	3.24	3.128	2.08967	3.04	4.04	4.03	3.33	4.038	3.439	2.51	3.57	4.62174	3.18	4.77	4.24	2.94	4.02	6.42	4.96993	2.39	5.78	5.41	5.66941	5.07		7.62
104	0.057		0.747	0.381	1.02		0.55	1.61	0.971	0.798	1.71	1.52	1.67267	2.07	2.44	2.42	2.6	1.16	3.15	2.97	3.44	1.85122	3.54	2.93	2.824	2.499	2.77	2.59	3.09	1.15	3.954	1.9632	4.53	3.67	3.12391	4.22	4.37	3.55	5.28	4.6	3.42	4.51962	2.44	5.58	5.34	4.7231	6.38	2.8	8.8
105	0.007	0.545	0.684	0.896333	0.77		1.51633	1.07	1.339	1.394	1.59	1.06	1.23433	1.55	1.92	2.19	1.957	1.43	2.04	1.56	2.27	1.66707	2.2	3.12	2.99	2.51933	3.75	3.97	2.86	3.54	3.011	3.2616	2.98	1.87	2.92826	3.44	3.74	4.02	4.59	4.48	3.96	5.1125	4.11	4.87	5.98	4.41911	5.61	7.63	7.09
114	0.176	1.024	0.239667	0.455	1.07		0.737	1.56	1.56		1.82	1.5	0.718	2.03	2.16	2.37	2.122		2.62	2.72	3.32		3.34	2.63	2.95867	3.19333	3.12	3.39	3.92	4.63	3.402	3.6192	2.48	3.92	4.41087	4.31	5.76	4.01	3.52	7.85	4.64	5.54505	1.82	5.411	4.08	4.41642	6.22		6.5
115	0.018	0.567		2.68533	1		0.664	1.55	1.066	1.962	1.79	1.69		2.3	1.12		2.505		2.09	3.19	2.51		2.48	1.28	3.75167	2.697	1.74	3.71	3.79	3.54	2.917	2.681	3.31	3.95	2.39348	3.99	3.09	3.38		3.26	4.62	4.12311	1.85	6.6	3.94	3.19069	4.86		5.53
124	0.01	0.729	0.737	0.735	0.81	0.95	0.861333	1.17	1.275	1.663	1.36	1.15	0.87	1.72	1.64	3.25	2.281	3.18	0.61	3.53	2.33	1.9378	2.31	3.09	3.24733	3.277	3.4	2.66	3.26	2.88	3.415	1.942	4.13	4.49	2.66522	2.32	4.98	3.39	5.93	4.24	3.3	4.44024	3.7	6.335	5.04	3.30927	5.46	2.57	5.45
127	0.102	0.4165	0.763	0.447333	0.86	1.14	1.60467	1.42	1.325		1.34	1.29	0.856667	1.76	1.71	2.15	3.29	2.29	1.48	2.72	2.31	1.98171	2.31	2.86	1.68733	2.71533	2.39	2.19	2.63	1.44	3.338	2.781	4.42	4.28	2.7413	3.64	2.57	3.94	3.5	2.26	4.62	4.5431	4.17	4.605	5.82	4.25953	3.79	7.11	4.91
128	0.133	0.688	0.606333	0.335667	0.72	0.31	1.17	1.03	1.015	1.277	1.59	1.24	1.16533	1.54	1.88	2.95	2	2.17	3.14	2.69	1.58	3.01585	1.83	2.6	2.227	2.902	3.2	3.02	2.9	1.75	3.198	2.718	3.64	3.98	3.39348	5.18	3.16	5.16	4.17	4.14	4.18	3.55376	5.54	4.148	5.24	5.2475	6.18	8.84	7.3
143	0.053	0.456	1.08133	1.65333	0.84		1.80533	1.37	1.2	1.332	1.77	1.53	1.86133	1.91	1.77	3.61	2.246		1.36	3.62	1.67		1.75	2.62	3.44867	1.587	2.43	4.05	4.91	2.45	3.288	3.9504	4.66	4.83	3.86957	4.56	5.96	6.33	3.18	6.33	3.44	5.37124	2.05	4.487	5.69	5.58945	4.97		6.65
144	0.073	0.4265	0.588333	0	0.81	0.2	0.137	1.2	1.45	1.04	0.47	1.37	1.30833	1.65	1.51	1.33	2.357	1.31	1.03	1.31	2.17		2.13	1.66	2.942	1.65533	1.47	2.94	2.29	3.2	1.77	2.5386	1.17		2.75652	1.74	3.31	1.3	$0.6	4.52	3.44	4.13712		3.09	2.7	4.37752	2.95		4.88
146	0.053	0.678	0.748333	1.05733	0.98		0.996333	1.56	1.829	1.719	1.27	1.51	1.772	2.05	1.6	3.09			7.97	2.54	2.18		2.26	2.11	2.83133	2.58733	2.4	4.05	2.97	3.14	3.666	4.2024	3.39	3.92	5.11739	3.92	5.13	3.61	2.18	8.65	4.46	5.04423	1.8	4.831	7.48	5.94315	5.33		6.67
Mean	0.107864	0.6567	0.670232	0.819567	0.914524	1.026	1.27463	1.38774	1.36823	1.41216	1.43357	1.45429	1.45889	1.90714	1.94095	2.16037	2.18745	2.27323	2.40405	2.44286	2.46452	2.47927	2.5381	2.61929	2.7087	2.86084	2.98357	3.01524	3.16446	3.18735	3.211	3.24648	3.4888	3.5484	3.62148	3.76564	3.82786	4.01038	4.03405	4.32905	4.21766	4.38846	4.56309	4.62842	4.68679	4.99318	5.50726	6.31576	6.5869
Mean 2008	ELWLW 0-3h
14	0.043	0.7785	0.932667	0.721667	0.82	0.24	1.60067	1.17	1.305	0.892	1.84	1.3	1.72167	1.68	1.47	1.48	2.296	1.67	2.64	2.32	1.88	2.37195	1.96	3.18	2.969	3.30567	2.85	2.11	2.25	3.3	2.44	3.946	1.96	2.96	2.73043	4.09	4.77	3.59	5.26	4.78	3.56	5.50026	6.42	4.052	4.22	6.08465	5.19	6.3	5.98
30	0.225	0.6095	0	0.508333	0.89	1.62	1.20033	1.41	1.809	1.377	1.6	1.31	1.05267	1.72	2.1	1.88	1.359	1.68	4.27	1.92	2.79	2.66341	2.74	2.52	1.794	2.60967	3	2.24	3.34	2.02	3.196	2.6772	2.79	3.08	2.92174		2.91		5.53	3.03	2.72	5.0432	5	3.563	6.17		5.33	6.33	7.79
31	0.034	0.592	0.358333	0.445	1.3		1.467	1.77	1.821	1.37	1.61	1.87	1.51733	2.42	1.83	2.11	2.475		1.95	2.78	3.27	2.46341	3.41	3.1	3.55433	2.58567	3.32	3.69	4.32	2.6	4.393	2.5646	4.53	4.7	2.94783	2.38	4.56	3.46	2.84	4.39	3.92	4.6969	2.32	5.68	5.22	5.03851	6.38		7.73
43	0.009	0.428	0.559667	0.951	0.85	1.32	1.70667	1.31		1.032	1.52	1.23	1.38867	1.65	1.77	1.26	2.154	3.07	2.59	2.71	2.01	2.14634	2.05	3.08	4.07967	3.64167	2.74	3.94	2.28	1.68	2.87	3.1676	5.3	4.77	3.22609	3.53	5.4	2.63	5.39	4.88	5.42	3.96248	6.41	4.307	4.66	4.02183	5.57	8.88	6.63
48	0.012	0.45	0.972333	0.592	0.85	0.63	1.392	1.46	1.709	1.203	1.3	1.63	1.49433	2.21	2.15	2.57	3.376	1.51	1.34	2.69	2.41	3.27439	2.66	2.99	3.42133	2.77267	3.18	3.55	4.27		3.979	3.4534	4.43	4.14	4.13478	5.07	5.32	3.23	6.08	5.19	5.02	5.83075	4.28	5.791	5.84	5.26098	6.86	8.82	7.33
49	0.064	0.4	1.122	0.380333	0.8	0.94	1.21567	1.15	1.049	0.622	1.08	1.42	1.64933	1.6	1.17	1.68	2.42	4.26	1.86	0.75	1.69	1.93415	1.64	1.69	2.63833	1.51867	1.93	2.7	1.65	5.22	1.969	3.2958	1.51	1.38	1.70652	1.76	4.02	2.39	1.98	3.13	3.6	3.00819	6.78	3.44	5.45	2.56613	3.02	7.27	4.46
53	0.05	0.444	0.419667	1.39767	0.85	1.05	1.60633	1.42	1.56		1.01	1.4	1.47733	1.94	1.83	2.82	3.13	1.95	2.05	2.82	2.53	3.15122	2.81	3.07	2.427	2.68733	2.58	3.96	3.75	3.56	2.871	3.4882	4.61	4.74	3.98696	5.21	4.04	5.4	6.38	5.58	4.74	5.3819	4.17	5.283	5.02	4.49863	6.45	3.88	9.17
54	0.193	0.861	0.738333	0.204	1.06	0.74	1.86233	1.61	1.819	1.522	1.23	1.62	1.63433	2.19	2.01	1.72	2.923	2.99	1.06	2.39	2.98		3.21	3.42	2.79933	2.89167	3.08	3.01	3.71	2.9	3.837	3.4456	3.12	4.73	3.29565	2.52	4.32	3.24	5.02	4.93	4.3	4.30286	3.35	5.501	5.12	6.3555	5.92	6.15	8.04
71	0.102	0.9655	0.681667	1.70733	0.81	0.34	1.69767	1.31	1.58	1.997	1.22	1.5	1.985	1.85	2.06	2.94	1.857	2.05	2.96	1.93	2.19	2.66098	2.27	2.19	2.54033	3.284	4	4.11	4.27	2.87	3.537	2.8766	5.17	4.81	5.94783	4.84	2.82	4.33		4.39	3.54	5.08724	5.8	4.357	4.02	5.66927	5.67	9.25	7.05
99	0.013	0.516	0.493	0.440333	0.8	0.49	1.18633	1.18	1.535	1.232	1.42	1.41	1.36833	1.75	1.69	2.71	1.526	0.81	1.8	2.37	2.24	3.36585	2.26	2.25	3.366	2.51233	2.23	3.39	3.5	3.33	3.052		4.78	3.96	3.33913	4.41	2.46	4.16	5.44	3.65	3.08	4.00669	4.46	5.085	3.13	4.52443	6.69	4.58	7.5
Mean 10 ELWL	0.0745	0.60445	0.627767	0.734767	0.903	0.818889	1.4935	1.379	1.57633	1.24967	1.383	1.469	1.5289	1.901	1.808	2.117	2.3516	2.22111	2.252	2.268	2.399	2.67019	2.501	2.749	2.95893	2.78093	2.891	3.27	3.334	3.05333	3.2144	3.21278	3.82	3.927	3.4237	3.75667	4.062	3.60333	4.88	4.395	3.99	4.68205	4.899	4.7059	4.885	4.89111	5.708	6.82889	7.168
Ratio !0/rest	0.690683	0.920436	0.936641	0.896531	0.987399	0.798137	1.17171	0.993703	1.15209	0.884931	0.964723	1.01012	1.04799	0.996779	0.931501	0.979925	1.07504	0.977072	0.936753	0.928421	0.973413	1.07701	0.985385	1.04952	1.09238	0.972068	0.968973	1.08449	1.05358	0.957954	1.00106	0.98962	1.09493	1.1067	0.945386	0.997617	1.06117	0.898502	1.2097	1.01523	0.946022	1.0669	1.07362	1.01674	1.04229	0.979557	1.03645	1.08125	1.08822
Overall advantage	1.004
Highest 10 CSDH lines
1	0.23	0.4505	0.521333	0.617	0.8	1.21	1.835	1.14	0.87	1.568	1.38	1.48	1.28067	1.63	2.15	2.74	1.796	3.05	4.03	3.51	1.96	1.96951	2.13	2.37	2.53367	3.38633	2.69	2.63	2.1	3.03	2.875	3.58	3.3	3.32	2.88696	3.73	1.93	3.71	4.16	3.81	3.7	4.3129	2.18	3.231	4.68	4.58993	3.81	8.23	5.83
13	0.316	1.026	0.673333	0.989667	0.89	1.3	1.97733	1.31	1.15	1.783	2.03	1.34	1.82933	1.96	2.23	1.56	3.47	3.53	0.94	2.75	2.54	3.28415	2.51	2.81	2.4	3.29833	5.16	3.05	3.62	2.83	3.183	3.0824	4.18	5.2	4.32391	5.26	3.72	4.77	2.75	4.64	3.16	5.22546	3.91	4.822	4.41	5.88681	6.13	8.35	7.04
16	0.088	0.33			0.93	0.84		1.33	1.215	1.684	1.7	1.18		1.72	1.92	2.39	1.997	2.37	1.41	2.71	2.86	1.83293	2.83	2.38			3.12	3.97	2.18	2.63	2.243	3.335	4.56	3.22	4.11304	5.23	1.87	5.52	3.55	2.81	2.22	3.48927	6.29	3.844	3.38	3.59811	6.01	3.99	8.17
17	0.033	0.5015	0.617	0.76	0.97	0.72	1.18967	1.44	1.39	1.092	1.37	1.4	1.75467	1.91	1.96	1.18	1.838	2.37	1.87	2.17	2.56	2.69634	2.56	2.47	2.25533	2.31233	3.35	2.82	3.13	2.73	2.167	3.7696	3.64	3.89	3.72609	5.42	4.38	4.98	3.53	6.59	3.94	4.28652	6.18	3.085	7.28	5.31836	5.29	5.56	6.94
19	0.09		0.621	1.62767	0.86	1.5	1.76433	1.33	1.019	1.287	1.34	1.43	1.36733	1.84	2.15	2.21	1.989	2.35	2.95	1.86	2.02		2.29	2.9	3.24467	3.12233	2.11	3.14	3.51	3.76	3.881	3.4462	2.88	3.27		3.88	2.94	5.18	3.03	5.75	5.18	4.28518	4.6	5.48	3.38	5.36436	5.98	5.62	7.38
21	0	0.8675	0.822667	0.811	0.85	1.6	0.541667	1.4	1.83	1.653	1.53	1.53	1.46433	1.98	2.35	2.02	2.014	2.49	1.13	2.47	2.74	3.34146	2.8	3.01	2.053	2.99833	3.21	2.92	3.02	1.91	2.704	3.3638	5.48	2.49	4.38478	4.63	3.02	4.38	7.15	3.73	2.92	4.04284	5.46	4.223	3.85	5.21892	5.66	7.39	6.21
38	0.061	0.566	0.152667	0.399333	0.72	0.93	0.959667	1.06	1.33	1.4	1.36	1.24	1.25633	1.52	1.17	0.88	2.201	2.05	1.73	1.39	1.55	1.54634	1.49	1.66	1.992	2.447	2.13	2.6	1.58	4.88	1.843	3.0526	2.01	1.62	2.85435	1.59	2.51	1.08	2.94	1.86	4.68	3.2946	4.3	3.728	2.15	2.61553	1.74	4.49	3.96
40	0.143	0.47	0.662	0.478667	0.72	0.3	1.412	1.02	1.09	1.19	1.75	1.14	1.18567	1.41	1.89	1.34	1.51	1.01	1.82	2.16	1.59	2.67317	1.53	2.46	2.23	2.02567	3.4	2.41	3.27	2.46	1.8	2.7388	2.76	2.5	4.07826	2.44	2.39	2.52	2.68	2.58	2.92	3.95261	3.58	3.513	2.82	3.6314	3.55	3.54	5.26
102	0.1	0.9335	0.259667	0.834667	0.95		1.34567	1.46	1.521	1.244	1.24	1.67	1.527	2.23	2.16	3.15	2.836		3.26	2.18	2.15		2.24	3.24	3.128	2.08967	3.04	4.04	4.03	3.33	4.038	3.439	2.51	3.57	4.62174	3.18	4.77	4.24	2.94	4.02	6.42	4.96993	2.39	5.78	5.41	5.66941	5.07		7.62
144	0.073	0.4265	0.588333	0	0.81	0.2	0.137	1.2	1.45	1.04	0.47	1.37	1.30833	1.65	1.51	1.33	2.357	1.31	1.03	1.31	2.17		2.13	1.66	2.942	1.65533	1.47	2.94	2.29	3.2	1.77	2.5386	1.17		2.75652	1.74	3.31	1.3	$0.6	4.52	3.44	4.13712		3.09	2.7	4.37752	2.95		4.88
Mean 10 ELWL	0.1134	0.619056	0.546444	0.724222	0.85	0.955556	1.24026	1.269	1.2865	1.3941	1.417	1.378	1.44152	1.785	1.949	1.88	2.2008	2.28111	2.017	2.251	2.214	2.4777	2.251	2.496	2.53096	2.59281	2.968	3.052	2.873	3.076	2.6504	3.2346	3.249	3.23111	3.74952	3.71	3.084	3.768	3.63667	4.031	3.858	4.19964	4.32111	4.0796	4.006	4.62703	4.619	5.89625	6.329
Ratio !0/lowest 10	0.656966	0.976407	1.14882	1.01456	1.06235	0.856977	1.20418	1.08668	1.22529	0.896397	0.976006	1.06604	1.06062	1.06499	0.927655	1.12606	1.06852	0.973697	1.11651	1.00755	1.08356	1.07769	1.11106	1.10136	1.16909	1.07255	0.974057	1.07143	1.16046	0.992631	1.2128	0.993254	1.17575	1.21537	0.913103	1.01258	1.31712	0.956299	1.34189	1.0903	1.03421	1.11487	1.13374	1.15352	1.21942	1.05707	1.23577	1.15817	1.13256
																																								M103+N103+O103+Q103+V103+X103+Z103+AA103+AB103+AC103+AD103+AI103+AK103+AM103+AS103+AT103+AX103+BA103+BB103
																																1.469	1.5289	1.901	2.117	2.399	2.501	2.95893	2.78093	2.891	3.27	3.334	3.927	3.75667	3.60333	4.7059	4.885	7.168	4.79349
																																1.01012	1.04799	0.996779	0.979925	0.973413	0.985385	1.09238	0.972068	0.968973	1.08449	1.05358	1.1067	0.997617	0.898502	1.01674	1.04229	1.08822	1.13352
																																1.378	1.44152	1.785	1.88	2.214	2.251	2.53096	2.59281	2.968	3.052	2.873	3.23111	3.71	3.768	4.0796	4.006	6.329	3.85018
																																1.06604	1.06062	1.06499	1.12606	1.08356	1.11106	1.16909	1.07255	0.974057	1.07143	1.16046	1.21537	1.01258	0.956299	1.15352	1.21942	1.13256	1.245
																																								D121+E121+F121+G121+H121+I121+K121+L121+U121+AD121+AE121+AF121
																																							0.627767	0.734767	0.903	0.818889	1.4935	1.379	1.24967	1.383	2.268	3.334	3.05333
																																							0.936641	0.896531	0.987399	0.798137	1.17171	0.993703	0.884931	0.964723	0.928421	1.05358	0.957954
																																							0.546444	0.724222	0.85	0.955556	1.24026	1.269	1.3941	1.417	2.251	2.873	3.076
																																							1.14882	1.01456	1.06235	0.856977	1.20418	1.08668	0.896397	0.976006	1.00755	1.16046	0.992631
[truncated: 68 more columns]

## Sheet: ELWLW 0-3h 2009+F-W plots
			New	New			New						New												New	New
CSDH	Yield/plant_S_Spain99	GrWt/plant/NFF_1994	Yield	dYield 2012	Yield/pl_droughted_Zaj06	Grain_wt/plant_rain_Kaz00adj	dYield 2011	Yield/pl_mn_Droughted_Zaj05	Diff_ear_dwt_SUSTExp2	moddrought_Yield/plant_T14_Krakow08	Yield/plant_sev_dr_Krakow10	Yield/pl_control_Zaj06	cYield 2013	Yield/pl_mn_Rainfed_Zaj05	GrainYd/plant_(Ht_adj)_N1_97	cont_Yield/plant_T35_Krakow08	Regr_adj_Yd/plant_Zaj02	Grain_yd/plant_irrig_Kaz00	Yield/plant_M_Spain99	Yield/plant_sev_drought_Krakow07	Yield/plant_rainfed_Zaj01	Grain_wt/plant/GH/1994	Yield/plant_irrig_Zaj01	GrainYield/plant_N2_97	cYield 2011	cYield 2012	GrainYd/plant_(Ht_adj)_N3_97	Yield/plant_cont_Krakow10	Yield/plant_mod_drought_Krakow07	Grain_yd/plant_A_Kaz98	Yield/plant_rain_Zaj00	Consel 2003(50pl/row)	Vern_Total_yield/pl_Krakow06	Yield/plant_control_Krakow07	Grain_wt/plant/Mor_1994	75ppb_Mn_Grain_wt/pl_03	GrainYd/plant_(Hr_adj)_N1_98	NFA_Mn_Grain_wt/pl_03	Non-vern_Total_yield/pl_Krakow06	GrainYd/plant_(Ht_adj)_N2_98	Conselice_Yield/plant_04	Yield_g/plant_adj(2,80)_Idice03	Grain_yd/plant_B_Kaz98	Yield/plant_irrig_Zaj00	GrainYield/plant_N3_98	Idice_Mn_Yield/plant_13%_04	Total_yield/plant_75ppb_05	Grain_yd/plant_A_Kaz99	Total_yield/plant_NFA_05
Mean	0.10375	0.652566	0.665461	0.810144	0.914526	1.00081	1.29895	1.38747	1.39001	1.39573	1.42819	1.45558	1.46676	1.90537	1.92421	2.1556	2.20612	2.26689	2.414	2.42426	2.45568	2.47	2.53432	2.63168	2.7365	2.85196	2.98116	3.04234	3.18269	3.19613	3.22173	3.25	3.52191	3.59	3.61	3.76682	3.86095	3.97202	4.081	4.34189	4.42	4.437	4.57978	4.64389	4.71242	4.96578	5.53	6.37733	6.64989
1	0.23	0.4505	0.521333	0.617	0.8	1.21	1.835	1.14	0.87	1.568	1.38	1.48	1.28067	1.63	2.15	2.74	1.796	3.05	4.03	3.51	1.96	1.96951	2.13	2.37	2.53367	3.38633	2.69	2.63	2.1	3.03	2.875	3.58	3.3	3.32	2.88696	3.73	1.93	3.71	4.16	3.81	3.7	4.3129	2.18	3.231	4.68	4.58993	3.81	8.23	5.83
2	0.272	0.7545	0.591	1.577	0.87	0.28	1.96833	1.38	1.091	1.552	2.38	1.58	1.97033	1.93	1.64	2.04	1.43	2.6	4.97	2.62	2.19	2.51829	2.39	2.47	1.62667	2.83067	2.92	3.29	2.68	4.48	3.482	3.0118	2.82	3.84	3.5413	3.33	2.85	2.62	3.9	4.02	4.86		2.92	4.965	4.8	4.87399	6.39	9.2	7.22
3	0.036	0.4005	0.727667	0.489333	0.92		1.10467	1.41	0.954	1.351	0.49	1.53	1.601	2.17	1.59	2.55	2.873	1.46	1.38	2.1	2.78	2.15122	2.75	2.72	3.99867	3.323	2.17	3.04	4.1	3.76	2.795	3.0752	3.37	3.3	3.35217	2.76	5.35	3.33	2.49	5.99	5.58	5.99969	4.86	5.222	4.54	5.12926	5.05	5.52	6.93
4	0.107	0.636	0.434	0.913667	0.81		1.59167	1.19	0.891	1.861	1.86	1.4	1.78067	1.84	1.93	2.14	1.865		2.5	3	2.01		2.28	2.26	3.74933	3.34567	2.54	2.86	3.19	3.37	3.154	3.9092	3.02	3.1	2.7413	2.73	3.08	2.24	2.12	3.36	2.7	3.65657	1.77	5.892	6.75	3.76945	4.49		3.76
5	0.06	0.696	0.718667	0.560333	0.98	0.82	1.40633	1.41	2.079	1.464	1.27	1.45	1.562	1.73	1.62	3.21	2.585	1.92	1.19	2.87	2.1	3.20488	2.29	2.53	2.56833	3.288	2.77	3.49	4.95	7.34	3.27	3.393	6.43	5.25	3.7413	4.48	2.9	5.18	7.46	3.17	4.16	3.9775	6.14	4.23	3.89	7.31431	7.83	3.84	8.12
7	0.121	0.841	0.804	0.456333	1.14		1.61433	1.55	1.93	1.582	1.36	1.63	1.67567	1.97	1.67	2.1	1.75		1.1	2.66	2.84		2.96	1.64	2.44467	2.23333	2.81	3.66	3.62	2.84	3.82	3.5108	2.22	2.91	4.57826	4.92	4.51	3.45	4.5	5.44	7.1	4.74423	3.4	4.548	3.75	5.64566	5.44		6.34
8		0.72	0.818333	0.629	1.09	0.59	1.857	1.45	1.635	1.745	0.9	1.65	1.38633	1.98	1.91	2.65	2.292		1.68	2.61	3.13	2.79512	3.08	2.48	3.53733	4.328	3.57	2.65	4.43	2.13	3.292	3.4404	4.17	3.71	3.42174	6.26	3.24	5.38	1.67	3.52	5.56	5.23404	9.22	4.41	4.54	5.8574	6.48	6.3	8.29
9	0.032	0.8725	0.835	0.454	1.06	0.46	1.143	1.7	1.686	1.535	1.7	1.76	1.704	2.46	1.83	2.3	2.351	3.64	2.61	2.22	3.93	1.87561	3.85	2.16	3.006	3.17767	2.64	2.27	2.35	1.18	2.96	4.0558	3.03	3.8	3.41957	4.73	4.78	5	5.74	4.92	4.52	4.70521	5.88	4.818	7.49	4.48623	6.75	6.26	6.2
10	0.015	0.9375	0.86	0.0413333	1.02	0.31	1.45133	1.51	1.709	1.349	1.64	1.63	1.694	2.35	2.72	2.52	2.839	1.6	1.69	1.46	2.93	3.62195	3.16	3.6	2.874	2.21533	4.27	1.42	3.8	5.16	4.269	4.7688	2.37	3.96	3.76087	4.6	4.84	4.14	5.73	5.23	5.72	4.46791	6.6	6.965	5.06	4.60256	6.9	5.07	7.71
11	0.135	0.5825	0.403	0.654333	0.85	0.72	1.28433	1.48	1.28	1.235	1.36	1.55	1.42767	2.04	1.77	2.76	1.469	1.13	1.99	2.81	2.86	1.7	2.81	2.74	3.124	2.71533	3.77	2.5	3.95	3.94	2.631	4.7336	2.27	4.75	3.55217	3.73	4.03	3.72	5.12	4.09	3.66	3.54706	5.07	4.685	5.34	3.77902	4.54	5.19	5.64
12	0.147	0.34			0.95	0.62		1.52	1.52	1.31	1.36	1.53		1.92	1.82	1.6	2.803	2.2	4.27	1.78	2.12	2.52927	2.35	2.14			2.82	2.9	4.12	3.36	3.582	1.99	3.37	4.39	5.17174	5.11	3.86	5.67	3.28	4.14	5.64	5.48299	6.35	4.825	4.85	7.60159	6.12	6.56	6.5
13	0.316	1.026	0.673333	0.989667	0.89	1.3	1.97733	1.31	1.15	1.783	2.03	1.34	1.82933	1.96	2.23	1.56	3.47	3.53	0.94	2.75	2.54	3.28415	2.51	2.81	2.4	3.29833	5.16	3.05	3.62	2.83	3.183	3.0824	4.18	5.2	4.32391	5.26	3.72	4.77	2.75	4.64	3.16	5.22546	3.91	4.822	4.41	5.88681	6.13	8.35	7.04
14	0.043	0.7785	0.932667	0.721667	0.82	0.24	1.60067	1.17	1.305	0.892	1.84	1.3	1.72167	1.68	1.47	1.48	2.296	1.67	2.64	2.32	1.88	2.37195	1.96	3.18	2.969	3.30567	2.85	2.11	2.25	3.3	2.44	3.946	1.96	2.96	2.73043	4.09	4.77	3.59	5.26	4.78	3.56	5.50026	6.42	4.052	4.22	6.08465	5.19	6.3	5.98
15	0.113	0.5495	1.02067	1.67433	1.2	0.26	1.64533	1.58	1.705	1.31	1.39	1.66	1.6	2.16	1.46	2.25	2.054	1.11	3.3	2.35	2.83	1.86098	2.86	2.41	2.63867	2.608	2.7	2.45	2.94	2.83	3.55	3.7138	3.26	3.13	4.13913	3.55	4.93	5.3		4.54	4.58	5.0598	6.24	4.972	4.63	5.05517	6.74	4.82	7.32
17	0.033	0.5015	0.617	0.76	0.97	0.72	1.18967	1.44	1.39	1.092	1.37	1.4	1.75467	1.91	1.96	1.18	1.838	2.37	1.87	2.17	2.56	2.69634	2.56	2.47	2.25533	2.31233	3.35	2.82	3.13	2.73	2.167	3.7696	3.64	3.89	3.72609	5.42	4.38	4.98	3.53	6.59	3.94	4.28652	6.18	3.085	7.28	5.31836	5.29	5.56	6.94
18	0.207	0.786	0.397	0.853667	1.24	2.98	1.41867	1.62	2	1.501	1.16	1.71	1.821	2.16	2.68	1.93	3.069	1.98	1.68	2.15	3.4	2.84268	3.75	4.05	3.69733	3.94467	4.33	3.37	4.13	4.49	3.648	4.4896	4.58	4.91	3.7	4.09	4.2	2.73	4.47	5.18	4.1	5.75226	3.21	5.281	5.29	4.75296	4.4	6.43	6.82
19	0.09		0.621	1.62767	0.86	1.5	1.76433	1.33	1.019	1.287	1.34	1.43	1.36733	1.84	2.15	2.21	1.989	2.35	2.95	1.86	2.02		2.29	2.9	3.24467	3.12233	2.11	3.14	3.51	3.76	3.881	3.4462	2.88	3.27		3.88	2.94	5.18	3.03	5.75	5.18	4.28518	4.6	5.48	3.38	5.36436	5.98	5.62	7.38
20	0.124	0.6275	0.980667	1.48067	1.01	0.47	1.31267	1.58	1.077	1.155	1.93	1.56	1.81767	2.11	2.62	2.28	2.569	2.2	3.09	3.59	2.91	3.25	2.97	3.53	2.53233	2.31833	3.77	3.48	3.26	2.24	3.8	4.6176	4.97		3.98913	4.47	3.83	5.03		5.49	3.86	5.44696	2.62	4.676	6.52	5.9214	5.46	6.11	7.68
21	0	0.8675	0.822667	0.811	0.85	1.6	0.541667	1.4	1.83	1.653	1.53	1.53	1.46433	1.98	2.35	2.02	2.014	2.49	1.13	2.47	2.74	3.34146	2.8	3.01	2.053	2.99833	3.21	2.92	3.02	1.91	2.704	3.3638	5.48	2.49	4.38478	4.63	3.02	4.38	7.15	3.73	2.92	4.04284	5.46	4.223	3.85	5.21892	5.66	7.39	6.21
22	0.097	0.7875	1.04567	0.532667	1.17	1.29	1.37567	1.55	1.565		1.51	1.82	1.647	2.01	2.63	1.74	2.042	2.1	3.01	2.16	2.99	2.61829	2.93	3.07	3.88267	3.606	4.44	3.12	2.55	3.94	2.964	3.2696	3.04	4.09	3.80435	5.39	6.57	4.41	4.36	6.23	6.16	4.69	4.2	4.596	5.71	6.66022	6.02	7.11	7.01
23			1.01933	1.28133	0.95	1.13	1.465	1.53	1.56	1.828	1.37	1.53	1.59433	1.96	2.18	2.96	2.988	2.21	1.56	2.24	2.97	3.58293	3.24	3.89	3.50733	3.069	3.64	2.21	2.51	2.66	3.31	3.6556		2.44	3.31739	4.09	4.98	4.42	4.62	4.59	4.6	6.39327	7.94	3.81	6.86	4.17462	6.95	8.93	7.26
24	0.211	0.482	1.35667	0.843	1.1	1.11	1.81167	1.59	1.529	1.837	1.57	1.72	2.081	2.25	1.7	1.78	2.652	3.33	2.63	3.35	3.4	2.52317	3.4	2.95	3.68367	4.16067	3.68	3.16	4.47	4.28	3.458	4.7666	2.89	5.29	4.55	3.65	5.26	2.73	5.46	4.31	4.46	4.63479	5.04	5.401	6.47	4.85885	6.86	10.76	6.78
25	0.061	0.786	1.041	1.54933	0.9		1.15267	1.44	1.08	1.687	1.27	1.47	1.86	1.93	1.59	2.23	3.231		2.03	2.12	1.57		1.93	1.91	3.77533	3.764	1.75	3.69	2.95	1.15	3.065		2.91	3.64	1.31304	2.98	2.6	3.31	2.06	3.99	4.62	4.90278	1.15	4.869	4.65	4.45915	5.87		6.06
26	0.177	0.934	0.661667	3.37167	0.85		2.27233	1.36		2.004	1.97	1.58	2.04067	2.03	1.61	1.99	1.431		5.49	3.05	2.04		2.07	2.24	2.864	3.90033	2.51	4.44	2.93	2.3	2.354	2.7438	3.32	2.98	4.88478	2.66	5.31	2.79	3.88	4.98	3.3	3.30443	1.8	3.395	7.12	5.89266	4.98		7.45
27	0.042		0.716	0.515667	1.03	0.52	1.126	1.39	0.989	1.387	1.57	1.26	1.06867	1.77	1.51	1.49	2.318	2.92	3.21	2.23	2.4	2.37927	2.54	2.03	2.42533	3.40533	2.45	2.62	3.61	2.92	2.621	2.8182	3.82	3.59	3.64565	4.03	3.99	3.89	3.42	3.53	3.62	3.48089	4.31	3.154	4.55	4.04054	5.62	7.38	6.27
28	0.24	0.688	0.786	1.24367	0.91	0.92	0.207667	1.43	1.211	0.616	1	1.42	1.765	1.82	1.63	1.34	2.005		5.51	2.29	2.55	1.87805	2.55	3.37	3.03133	1.53333	1.36	2.43	2.17	3.78	3.271	3.0662	2.73		5.84565	2.66	4.27	3.29	3.83	6.09	4.98	5.12523	4	5.305	6.11	6.10168	4.43	3.69	4.72
29	0.017	0.69	0.325	0.830333	0.97		1.10933	1.4	0.915	1.483	1.85	1.34	1.133	1.73	1.7	1.39	2.515		2.37	2.6	2.61		2.59	2.58	2.24	2.39033	3.96	2.13	3.48	3.94	3.256	3.369	3.29	4.17	3.73261	1.82	4.27	2.78		5.21	3.7	3.78851	3.68	4.751	6.48	3.74962	5.72		5.6
30	0.225	0.6095	0	0.508333	0.89	1.62	1.20033	1.41	1.809	1.377	1.6	1.31	1.05267	1.72	2.1	1.88	1.359	1.68	4.27	1.92	2.79	2.66341	2.74	2.52	1.794	2.60967	3	2.24	3.34	2.02	3.196	2.6772	2.79	3.08	2.92174		2.91		5.53	3.03	2.72	5.0432	5	3.563	6.17		5.33	6.33	7.79
31	0.034	0.592	0.358333	0.445	1.3		1.467	1.77	1.821	1.37	1.61	1.87	1.51733	2.42	1.83	2.11	2.475		1.95	2.78	3.27	2.46341	3.41	3.1	3.55433	2.58567	3.32	3.69	4.32	2.6	4.393	2.5646	4.53	4.7	2.94783	2.38	4.56	3.46	2.84	4.39	3.92	4.6969	2.32	5.68	5.22	5.03851	6.38		7.73
32	0.141	0.878	0.549667	0.728333	0.95	0.59	1.703	1.59	1.585	1.513	1.15	1.55	1.66667	2.09	1.97	1.97	5	1.86	3.12	2.93	2.4	1.84634	2.61	2.37	3.22033	2.66733	2.77	3.58	3.83	5.31	3.829	3.5294	4.92	2.94	4.5587	4.66	3.98	4.48	4.16	4.53	2.58	5.15443	4.82	4.963	4.27	5.16812	6.59	5.1	7.3
33	0.187	0.8945	0	0.333333	0.98	1.83	2.06167	1.61	1.445	1.493	1.91	1.67	1.502	2.36	2.55	2.55	1.976	4.04	3.31	2.86	2.46	2.77439	2.54	2.8	2.52367	3.07233	3.22	2.84	3.97	5.72	3.708	3.2324	1.89	4.16	4.15217	3.99	4.38	3.86	4.39	4.14	3.24	3.48416	5.57	4.323	3.97	5.42744	5.38	10.44	6.72
34	0.158	0.6125	0.559333	0.479667	0.84	0.67	0.642333	1.26	1.299	1.581	1.03	1.31	1.201	1.61	1.59	1.91	1.018	2.32	2.5	1.93	2.88	2.02195	2.89	1.9	2.69933	2.41033	2.58	2.67	2.38	1.84	2.355	2.7458	3.54	2.12	1.73913	2.28	2.72	2.94	5.31	3.57	3.24	3.75713	2.93	4.607	2.93	3.33536	4.97	4.13	4.7
35	0.028	0.5425	0	0.674	0.86	1.24	0.922	1.29		1.397	1.43	1.39	0.87	1.73	2.26	1.75	1.784	1.55	0.56	2.21	1.73	2.73902	1.93	1.85	2.078	2.055	2.31	3.52	2.77	3.1	2.469	3.3914	3.15	2.96	2.27391		3.06		4.52	3.37	4.84	4.89862	2.55	2.727	3.06	4.85257	4.99	5.68	5.46
36	0	0.587	0.297333	0.201	0.96	0.1	0.424667	1.34	1.345		1.26	1.51	0.871	1.72	2.04	1.9	1.792		1.11	2	3.01	1.20976	2.97	2.91	2.88633	2.598	2.98	2.52	2.58	3.48	2.374	3.428	3.39	2.79	3.80652	2.05	5.57	2.33	2.45	4.55	3.48	3.48354	4.94	3.803	4.46	3.83419	4.43	6.75	6.33
37	0.136	0.696	0.701333	0.566667	0.88	1.44	0.505	1.3	1.45	1.346	1.31	1.37	0.854667	1.71	1.84	1.76	1.508	1.94	0.93	2.09	2.66	1.4622	2.57	2.5	2.51467	2.81167	3.59	2.33	2.19	5.22	2.61	3.3076	3.36	2.5	2.64565	3.28	3.56	4.55	4.43	3.83	3.86	4.72012	10.84	4.409	4.34	4.59078	5.79	5.45	5.71
38	0.061	0.566	0.152667	0.399333	0.72	0.93	0.959667	1.06	1.33	1.4	1.36	1.24	1.25633	1.52	1.17	0.88	2.201	2.05	1.73	1.39	1.55	1.54634	1.49	1.66	1.992	2.447	2.13	2.6	1.58	4.88	1.843	3.0526	2.01	1.62	2.85435	1.59	2.51	1.08	2.94	1.86	4.68	3.2946	4.3	3.728	2.15	2.61553	1.74	4.49	3.96
39	0.093	0.693	1.36333	0.649333	0.84	0.86	1.37133	1.39	1.375	1.702	1.62	1.5	1.59567	1.84	2.31	1.47	1.412	2.41	2.91	2.76	2.18	3.05488	2.32	4.09	2.35867	2.867	2.87	3.32	3.27	3.09	3.88	2.7348	4.75	2.68	3.30652	5.62	3.73	4.69	3.71	4.03	4.42	3.95446	4.74	4.025	3.24	6.20766	6.04	6.22	7.87
40	0.143	0.47	0.662	0.478667	0.72	0.3	1.412	1.02	1.09	1.19	1.75	1.14	1.18567	1.41	1.89	1.34	1.51	1.01	1.82	2.16	1.59	2.67317	1.53	2.46	2.23	2.02567	3.4	2.41	3.27	2.46	1.8	2.7388	2.76	2.5	4.07826	2.44	2.39	2.52	2.68	2.58	2.92	3.95261	3.58	3.513	2.82	3.6314	3.55	3.54	5.26
42	0.008	0.335	0.847667	0	0.81		1.26567	1.17	0.901	1.349	0.85	1.27	1.73133	1.63	0.91		2.2		0.66	1.45	1.85		1.94	1.4	2.01833	2.25533	1.87	2.57		4.96	1.811	2.1464	3.01	3.51	3.39783	2.49	3.85	1.66	0.23	4.35	3.4	1.98437	1.15	3.418	3.04	3.16852	2.4		3.42
44	0.018	0.419			0.92	1.28		1.38	1.319	1.891	1.35	1.29		1.7	2.21	0.75	1.849	2.48	1.2	3.22	2.92	2.36585	3	2.72			3.57	3.59	3.89	4.24	3.074	3.6634	3.18	4.85	2.64783	3.87	5.26	3.3	7.13	4.1	5.4	5.56551	5.66	4.564	4.13	6.21697	4.15	5.47	5.62
45	0.1	0.7105	0.593	1.04967	0.82		1.65567	1.26	1.6	1.368	0.93	1.51	1.52833	1.8	1.77		1.139		2.79	2.19	1.76		1.92	2.44	2.57833	2.931	2.89	2.26	2.89	4.96	3.541	3.8778	5.2	3.48	4.55435	2.52	2.82	4.32	2.78	4.24	2.32	3.18281	3.92	4.636	3.16	5.49529	5.45		7.03
46	0.113	0.9125	0.806667	0.747667	0.89	0.53	1.64967	1.42	1.68	1.325	1.19	1.36	1.46667	1.8	2.62	2.45	1.567	2.51	2.13	3.13	1.69	3.45976	1.74	3.28	2.393	3.49967	3.56	2.93	3.88	1.68	3.526	2.6952	4.62	3.61	3.6587	6.05	3.26	5.42	4.8	4.07	5.12	3.94689	8.07	4.547	4.52	5.60503	6.76	8.15	8.59
47	0.319	0.7645	0.728333	0.522333	0.81	1.12	1.185	1.28	1.606	0.835	1.22	1.26	1.41167	1.71	1.54	1.52	2.166	1.73	3.01	1.37	2.32		2.4	2.19	2.44833	2.52067	2.38	2.99	1.98	4.96	2.511	4.5988	1.59	1.93	2.73913	1.41	4.46	1.43	2.87	5.64		4.81501	2.49	3.371	4.92	3.9696	3.24	4.26	4.6
48	0.012	0.45	0.972333	0.592	0.85	0.63	1.392	1.46	1.709	1.203	1.3	1.63	1.49433	2.21	2.15	2.57	3.376	1.51	1.34	2.69	2.41	3.27439	2.66	2.99	3.42133	2.77267	3.18	3.55	4.27		3.979	3.4534	4.43	4.14	4.13478	5.07	5.32	3.23	6.08	5.19	5.02	5.83075	4.28	5.791	5.84	5.26098	6.86	8.82	7.33
49	0.064	0.4	1.122	0.380333	0.8	0.94	1.21567	1.15	1.049	0.622	1.08	1.42	1.64933	1.6	1.17	1.68	2.42	4.26	1.86	0.75	1.69	1.93415	1.64	1.69	2.63833	1.51867	1.93	2.7	1.65	5.22	1.969	3.2958	1.51	1.38	1.70652	1.76	4.02	2.39	1.98	3.13	3.6	3.00819	6.78	3.44	5.45	2.56613	3.02	7.27	4.46
50	0.062	0.4545	0.941667	0.409333	0.94	0.47	0.755	1.48	1.09	0.928	1.18	1.48	1.123	1.9	1.36	2.5	2.156	2.3	1.95	2.45	2.7	2.7	2.87	1.61	1.93	2.438	2.23	2.44	3.28	3.48	2.419	3.1034	3.57	3.23	4.41304	1.72	4.63	3.7	3.51	5.95	3.7	4.11155	6.49	3.292	4.74	4.82998	9.57	7.22	5.79
51	0.044	0.6965	1.34933	0.411	0.88	0.31	1.932	1.47	1.519	1.325	1.19	1.58	1.703	2.1	2.52	2.22	2.027	3.32	1.43	2.58	2.18	3.41585	2.24	3.19	2.47633	2.94933	3.53	3.95	3.54	3.1	2.656	2.7754	4.34	4.51	5.31522	3.87	3.61	5.12	4.62	4.09	4.96	3.79341	5.17	3.336	5.28	5.25232	5.89	7.78	9
53	0.05	0.444	0.419667	1.39767	0.85	1.05	1.60633	1.42	1.56		1.01	1.4	1.47733	1.94	1.83	2.82	3.13	1.95	2.05	2.82	2.53	3.15122	2.81	3.07	2.427	2.68733	2.58	3.96	3.75	3.56	2.871	3.4882	4.61	4.74	3.98696	5.21	4.04	5.4	6.38	5.58	4.74	5.3819	4.17	5.283	5.02	4.49863	6.45	3.88	9.17
55	0.063	0.6665	0.61	0.486667	0.75		1.50567	1.27	1.525	1.385	1.26	1.44	0.968	1.83	1.99	1.25	1.608		2.95	1.98	2.16		2.15	2.83	3.111	2.44333	2.94	1.96	3.59	3.11	2.873	2.9238	2.88	3.37	3.31739	3.02	3.42	3.93	1.58	4.66	3.64	2.91278	2.65	4.553	4.3	5.58329	3.99		6.07
57	0.152	0.3965	1.523	0.974	0.9	1.34	1.33633	1.39	1.014	1.074	1.87	1.45	1.65433	1.94	2.04	1.45	2.371	1.86	0.94	1.95	2.84	2.71341	3.03	2.24	2.28167	2.81333	1.91	2.84	3.89	2.97	3.129	3.7096	2.56	4.66	4.27391	4.65	3.51	4.69	4.61	3.3	4.32	4.48291	8.36	5.261	4.56	5.98191	7.17	5.97	7.95
58	0.253	0.809	0.655333	1.345	0.97	1.52	2.061	1.53	1.42	1.837	1.64	1.67	1.55733	2.22	2.16	2.89	2.756	3.47	3.99	2.97	2.73	2.40732	2.83	3.3	2.397	2.41967	3.51	3.71	3.82	2.95	4.338	3.6502	4.92	4.08	4.12609	4.66	4.61	5.69	3.72	4.11	6.58	4.29138	7.31	5.605	4.91	6.66661	7.34	9.9	8.81
59	0	0.3365	0.860333	0.756	0.64	0.48	0.599	0.93		1.472	1.21	0.95	1.46733	1.17	1.47	1.94	1.398	1.65	3.22	2.78	1.14		1.36	1.79	1.78933	2.55067	2.52	2.5	2.53	3.83	3.346	2.7812	1.9	2.89	2.82826		2.37		3.75	2.18	5.72	3.23484	3.83	4.975	2.64	5.50334	4.72	6.96	4.87
62	0.019	0.71	0	0.838333	1.02	1.19	0.971667	1.5	1.611	1.167	1.44	1.62	1.02167	2.07	1.8	2.08	1.796	2.44	1.62	2.64	2.4	2.64878	2.59	2.59	2.90567	3.37633	3.27	3.26	2.61	3.98	3.588	2.0826	3.05	3.18	3.55217	3.86	4.54	4.42	1.56	5.18	4.94	4.73979	10.03	5.947	4.42	5.30714	4.72	7.1	6.22
63		0.68	0.569667	1.29767	0.83	0.22	0.796333	1.35		1.345	1.56	1.45	2.07533	2.08	1.77	2.88	3.75	1.87	1.31	1.91	2.41	2.98659	2.75	2.7	2.559	2.74233	3.37	2.58	4.01	2.38	1.853	3.506	2.93	4.21	2.63478	4.22	3.3	4.09	4.48	3.64	4.36	4.65117	2.62	3.532	3.85	5.72352	5.97	5.08	6.96
64	0.115	0.7015	0.921333	1.07867	0.95	1.34	1.30733	1.37	0.985	1.658	1.61	1.33	1.51667	1.95	2.17	3.06	1.851	2.13	1.7	2.6	2.71	2.59756	2.73	2.86	3.31733	3.08867	3.25	2.71	2.4	2.09	3.508	3.7104	2.94	2.29	4.33478	4.52	4.28	3.72	4.24	4.15	4.78	4.49007	5.28	5.609	4.95	5.932	4.17	6.74	6.15
65	0.083	1.0225	0.817333	1.838	1.06	1.77	0.793667	1.58	1.475	1.379	1.98	1.41	1.50133	1.98	1.76	2.97	3.418	1.77	2.12	1.62	2.08	$0	2.18	2.91	1.92767	2.77267	3.73	3.32	3.74	4.05	4.003	2.9952	4.75	3.83	4.13261	4	3.54	5.61	4.51	4.89	3.86	4.39131	3.71	4.4	4.97	4.53938	6.21		7.25
66	0.077	0.6465	0.324333	0.66	0.91	2.23	1.76567	1.39		1.275	1.6	1.25	1.53067	1.96	2.39	2.7	2.766	2.41	1.74	2.03	3.17	2.51951	3.14	3.3	3.68667	4.413	3.3	3.68	3.31	4.68	4.064	2.2626	2.3	3.74	4.46087		3.82	5.55	3.24	5.22	4.7	3.47578	6.26	5	5.94	6.59862	6.48	6.32	8.99
67	0.348	0.775	0.506667	0.648	0.71	0.99	1.72967	1.24	1.075	1.405	1.07	1.36	1.529	1.66	2.11	2.76	1.448	2.17	3.43	2.81	2.37	2.81463	2.4	2.17	2.719	2.68	2.43	3.35	3.15	2.48	3.518	3.1558	4.38	3.18	3.36304	4.6	3.13	5.21	3.75	3.69	4.02	3.85249	2.95	4.442	4.6	4.15485	5.97	4.69	7.36
69	0.054	0.743	0.723333	1.96967	0.99		1.84367	1.54	1.219	1.321	0.96	1.44	1.59233	2.03	2	1.64	3.569		1.58	2.86	2.66	0	2.62	3.29	3.54	3.10167	2.46	2.6	2.72	3.34	3.028	3.4966	2.82	3.85	4.0587	3.7	3.9	4.9	3.08	5.43	4.08	5.66044	1.6	3.811	5.7	5.11739	3.21		7
70	0.221	0.5635	0.662667	0.933	0.83	0.68	1.28667	1.29	1.095	2.058	2.06	1.12	1.34933	1.64	2.16	2.12	2.228	2.47	1.85	2.57	1.79	2.38902	2.03	3.18	1.892	2.70367	3.15	3.25	2.45	2.41	3.74	3.629	3.45	3.02	2.51522	4.65	1.89	5.27	3.69	2.3	3.3	3.62998	5.98	4.877	3.52	4.17901	3.9	4.79	6.24
71	0.102	0.9655	0.681667	1.70733	0.81	0.34	1.69767	1.31	1.58	1.997	1.22	1.5	1.985	1.85	2.06	2.94	1.857	2.05	2.96	1.93	2.19	2.66098	2.27	2.19	2.54033	3.284	4	4.11	4.27	2.87	3.537	2.8766	5.17	4.81	5.94783	4.84	2.82	4.33		4.39	3.54	5.08724	5.8	4.357	4.02	5.66927	5.67	9.25	7.05
72	0.095	0.452	0.414667	0.792333	0.74	1.22	1.09733	1.12	1.386	1.727	1.37	1.03	1.27867	1.43	1.69	2.38	1.82	1.43	1.79	1.79	2.1	1.9	2.08	1.98	2.105	2.768	2.35	3.16	1.98	1.48	2.53	3.7254	4.67	2.43	3.41522	4.34	2.33	4.35	5.88	2.24	4.34	3.96407	3.8	3.889	2.23	3.08222	4.24	6.17	6.23
80	0.143	0.5805	0.473667	0.45	0.89		1.02567	1.34	1.446	1.063	1.5	1.47	1.232	1.84	1.63	2.27	2.28		0.92	2.45	2.32	1.89024	2.26	2.95	2.92167	2.74567	2.29	3.45	2.05		3.129	2.308	2.79	3.18	3.12174	2.98	4.4	2.99	3.23	4.03	3.26			5.483	4.46	2.97533	4.21		5.56
86	0.11	0.5515	0.272667	0.771667	1.23	1.5	1.04133	1.54	1.46	1.431	0.86	1.66	1.44933	2.03	1.76	2.59	1.723	2.14	2.23	2.37	2.85	2.26951	2.81	2.93	2.76333	3.20733	3.21	2.38	2.07	2.5	2.36	2.5196	2.4	3.87	2.76304	3.41	3.04	4.19	3.95	3.3	4.54	4.46722	2.93	3.706	3.4	5.16634	4.43	5.93	6.16
87	0.075	0.659	0.927333	0.82	1.06	0.52	1.245	1.55	1.7	1.588	1.5	1.77	0.948	2.28	1.76	2.18	2.887	1.61	2.6	2.82	3.06	1.91707	2.8	3.29	3.62167	3.01867	3.06	3.16	2.98	1.27	4.53	3.7874	1.74	3.28	4.75652	3.13	3.45	3.95	7.31	3.5	4	4.37787	5.67	5.368	4.16	4.82717	5.23	6.23	7.1
88	0.055	0.368	0.645333	0.776	1	2.42	0.524667	1.49	1.59	1.29	1.39	1.49	1.37867	1.99	2.29	2.14	2.105	2.08	1.42	2.59	2.87	3.32073	2.88	2.94	2.43867	2.36667	2.51	3.38	3.12	1.26	3.238	2.5024	3.8	3.52	3.41522	3.63	3.27	5.41	6.41	3.88	4.78	4.84951	3.71	4.849	4.76	6.72609	6.74	7.14	6.64
90	0.284	1	0.969	0.107667	1.02	0.73	1.80433	1.6	2.42	1.104	1.33	1.76	1.95133	2.29	2.59	2.48	2.99	4.29	2.56	2.46	2.82	3.45366	2.89	3.23	2.80267	3.63567	4.32	3.81	4.19	1.71	5.356	3.9534	2.51	3.6	4.3087	3.87	4.56	4.8	4.91	4.66	4.48	5.74298	5.93	5.733	5	6.02485	7.95	8.47	11.03
91	0.072	0.612	0.822667	0.123667	1.03	0.25	1.18167	1.62	1.7	1.189	1.65	1.57	1.58367	2.17	2.2	1.67	2.639	3.89	1.69	2.07	3.72	1.51829	3.99	2.64	2.79033	2.77133	3.45	3.46	3.11	3.19	4.685	4.1784	5.84	4.17	2.11739		4.62		6.93	4.5	3.84	5.10172	4.31	5.134	4.57	3.9102	7.49	6.06	7.9
92	0.03	0.4645	0.325	0.217667	0.88	1.76	0.803333	1.35	1.399	1.584	1.67	1.23	0.857667	1.72	1.83	1.27	1.418	1.95	2.11	2.92	2.46	1.83415	2.4	2.38	2.10333	2.483	3.48	1.99	2.82	2.55	3.082	3.1038	3.84	3.34	2.1413	3.31	3.93	2.84	4.69	3.22	4.46	3.66045	1.56	5.156	5.2	4.88765	6.05	6.63	5.98
93	0.071	0.4825	0.634667	0.529333	1.16	0.65	1.402	1.62	1.26	1.377	1.49	1.76	1.21567	2.36	2.4	2.08	3.015	2.35	2	2.31	2.93	3.73415	2.85	2.87	2.15867	3.59233	3.71	2.22	3.53	3.33	4.643	3.5184	4.22	3.54	4.0087	3.9	2.99	4.71	4.9	3.31	3.84	4.03763	4.52	5.608	4.91	4.67829	5.94	9.02	6.72
94	0.033	0.6235	0.106667	0.0823333	0.76	0.45	0.386667	1.28	1.109	0.995	0.66	1.34	0.899667	1.78	1.69	1.71	0.731	1.02	3.42	1.76	2.17	2.58293	2.28	2.17	2.14333	2.64467	1.64	2.81	2.61	1.59	3.359	2.4722	3.55	3.53	3.48696	2.52	3.21	3.5	4.79	3.1	4.92	3.14145	5.27	4.409	5.09	5.72642	3.07	7.01	5.01
96	0.12	0.794			0.82	3.14		1.2		1.492	1.74	1.41		1.88	2.18	2.89	2.055	3.18	4.58	2.46	1.91	2.58537	2.01	2.65			4.23	2.45	2	2.14		2.9606	4.06	3.79	4.23478		4.03		5.93	3.58	4.68	4.85012	3.47	4.657	4.02	4.60331	5.67	8.13	6.96
97	0.021	0.7675	0.482333	0.369333	0.69	1.28	1.60967	1	1.365	1.413	1.13	1.38	1.30033	1.65	2.12	2.67	1.207	1.99	1.87	2.65	1.93	2.9	2	2.6	2.41767	3.24533	2.3	3.74	3.12	3.19	2.444	2.8756	3.36	3.99	1.49565	4.77	3.65	5.34	4.92	3.44	2.82	3.55923	8.2	3.797	3.85	6.2858	6.59	2.9	6.67
99	0.013	0.516	0.493	0.440333	0.8	0.49	1.18633	1.18	1.535	1.232	1.42	1.41	1.36833	1.75	1.69	2.71	1.526	0.81	1.8	2.37	2.24	3.36585	2.26	2.25	3.366	2.51233	2.23	3.39	3.5	3.33	3.052		4.78	3.96	3.33913	4.41	2.46	4.16	5.44	3.65	3.08	4.00669	4.46	5.085	3.13	4.52443	6.69	4.58	7.5
102	0.1	0.9335	0.259667	0.834667	0.95		1.34567	1.46	1.521	1.244	1.24	1.67	1.527	2.23	2.16	3.15	2.836		3.26	2.18	2.15		2.24	3.24	3.128	2.08967	3.04	4.04	4.03	3.33	4.038	3.439	2.51	3.57	4.62174	3.18	4.77	4.24	2.94	4.02	6.42	4.96993	2.39	5.78	5.41	5.66941	5.07		7.62
104	0.057		0.747	0.381	1.02		0.55	1.61	0.971	0.798	1.71	1.52	1.67267	2.07	2.44	2.42	2.6	1.16	3.15	2.97	3.44	1.85122	3.54	2.93	2.824	2.499	2.77	2.59	3.09	1.15	3.954	1.9632	4.53	3.67	3.12391	4.22	4.37	3.55	5.28	4.6	3.42	4.51962	2.44	5.58	5.34	4.7231	6.38	2.8	8.8
105	0.007	0.545	0.684	0.896333	0.77		1.51633	1.07	1.339	1.394	1.59	1.06	1.23433	1.55	1.92	2.19	1.957	1.43	2.04	1.56	2.27	1.66707	2.2	3.12	2.99	2.51933	3.75	3.97	2.86	3.54	3.011	3.2616	2.98	1.87	2.92826	3.44	3.74	4.02	4.59	4.48	3.96	5.1125	4.11	4.87	5.98	4.41911	5.61	7.63	7.09
114	0.176	1.024	0.239667	0.455	1.07		0.737	1.56	1.56		1.82	1.5	0.718	2.03	2.16	2.37	2.122		2.62	2.72	3.32		3.34	2.63	2.95867	3.19333	3.12	3.39	3.92	4.63	3.402	3.6192	2.48	3.92	4.41087	4.31	5.76	4.01	3.52	7.85	4.64	5.54505	1.82	5.411	4.08	4.41642	6.22		6.5
115	0.018	0.567		2.68533	1		0.664	1.55	1.066	1.962	1.79	1.69		2.3	1.12		2.505		2.09	3.19	2.51		2.48	1.28	3.75167	2.697	1.74	3.71	3.79	3.54	2.917	2.681	3.31	3.95	2.39348	3.99	3.09	3.38		3.26	4.62	4.12311	1.85	6.6	3.94	3.19069	4.86		5.53
124	0.01	0.729	0.737	0.735	0.81	0.95	0.861333	1.17	1.275	1.663	1.36	1.15	0.87	1.72	1.64	3.25	2.281	3.18	0.61	3.53	2.33	1.9378	2.31	3.09	3.24733	3.277	3.4	2.66	3.26	2.88	3.415	1.942	4.13	4.49	2.66522	2.32	4.98	3.39	5.93	4.24	3.3	4.44024	3.7	6.335	5.04	3.30927	5.46	2.57	5.45
127	0.102	0.4165	0.763	0.447333	0.86	1.14	1.60467	1.42	1.325		1.34	1.29	0.856667	1.76	1.71	2.15	3.29	2.29	1.48	2.72	2.31	1.98171	2.31	2.86	1.68733	2.71533	2.39	2.19	2.63	1.44	3.338	2.781	4.42	4.28	2.7413	3.64	2.57	3.94	3.5	2.26	4.62	4.5431	4.17	4.605	5.82	4.25953	3.79	7.11	4.91
128	0.133	0.688	0.606333	0.335667	0.72	0.31	1.17	1.03	1.015	1.277	1.59	1.24	1.16533	1.54	1.88	2.95	2	2.17	3.14	2.69	1.58	3.01585	1.83	2.6	2.227	2.902	3.2	3.02	2.9	1.75	3.198	2.718	3.64	3.98	3.39348	5.18	3.16	5.16	4.17	4.14	4.18	3.55376	5.54	4.148	5.24	5.2475	6.18	8.84	7.3
144	0.073	0.4265	0.588333	0	0.81	0.2	0.137	1.2	1.45	1.04	0.47	1.37	1.30833	1.65	1.51	1.33	2.357	1.31	1.03	1.31	2.17		2.13	1.66	2.942	1.65533	1.47	2.94	2.29	3.2	1.77	2.5386	1.17		2.75652	1.74	3.31	1.3	$0.6	4.52	3.44	4.13712		3.09	2.7	4.37752	2.95		4.88
146	0.053	0.678	0.748333	1.05733	0.98		0.996333	1.56	1.829	1.719	1.27	1.51	1.772	2.05	1.6	3.09			7.97	2.54	2.18		2.26	2.11	2.83133	2.58733	2.4	4.05	2.97	3.14	3.666	4.2024	3.39	3.92	5.11739	3.92	5.13	3.61	2.18	8.65	4.46	5.04423	1.8	4.831	7.48	5.94315	5.33		6.67
Mean	0.101975	0.654462	0.661875	0.793737	0.918571	0.970758	1.2733	1.3881	1.40092	1.40806	1.41786	1.4594	1.45178	1.90821	1.92381	2.1616	2.23806	2.23258	2.3719	2.40595	2.46571	2.49574	2.54107	2.64286	2.73742	2.86195	2.97655	3.00405	3.17783	3.205	3.20793	3.26729	3.45349	3.56506	3.57103	3.77231	3.84524	3.97658	4.19154	4.29893	4.21766	4.42384	4.54817	4.63304	4.71595	4.9721	5.47321	6.41224	6.64321
Mean 2009	ELWLW 0-3h
16	0.088	0.33			0.93	0.84		1.33	1.215	1.684	1.7	1.18		1.72	1.92	2.39	1.997	2.37	1.41	2.71	2.86	1.83293	2.83	2.38			3.12	3.97	2.18	2.63	2.243	3.335	4.56	3.22	4.11304	5.23	1.87	5.52	3.55	2.81	2.22	3.48927	6.29	3.844	3.38	3.59811	6.01	3.99	8.17
41	0.069	0.325	0.602	0.0983333	0.86	0.12	1.39033	1.43	1.215	1.177	1.2	1.37	1.457	1.89	1.35	1.15	1.764	3.17	3.8	1.25	2.73		3.05	1.17	2.824	1.63033	1.6	2.68	2.47	4.24	2.73	2.5958	1.26	1.75	2.83043	0.99	5.2	1.33	$0.56	7.02	4.06	2.5103	3.08	4.468	5.64	3.67989	4.96	3.86	3.6
43	0.009	0.428	0.559667	0.951	0.85	1.32	1.70667	1.31		1.032	1.52	1.23	1.38867	1.65	1.77	1.26	2.154	3.07	2.59	2.71	2.01	2.14634	2.05	3.08	4.07967	3.64167	2.74	3.94	2.28	1.68	2.87	3.1676	5.3	4.77	3.22609	3.53	5.4	2.63	5.39	4.88	5.42	3.96248	6.41	4.307	4.66	4.02183	5.57	8.88	6.63
52	0.068	0.7405	0.915667	0.914	0.93	2.46	1.271	1.5	1.575	1.462	1.68	1.42	1.67933	1.87	1.99	1.85	1.65	2.56	2.73	2.36	2.09	2.90732	2.09	3.01	2.42767	3.39333	3.1	2.8	3.34	2.02	3.934	3.3846	4.22	4.23	3.61739	4.52	3.44	4.03	4.16	4.08	4.7	4.68847	6.53	4.92	4.48	5.65324	6.89	6.17	7.11
54	0.193	0.861	0.738333	0.204	1.06	0.74	1.86233	1.61	1.819	1.522	1.23	1.62	1.63433	2.19	2.01	1.72	2.923	2.99	1.06	2.39	2.98		3.21	3.42	2.79933	2.89167	3.08	3.01	3.71	2.9	3.837	3.4456	3.12	4.73	3.29565	2.52	4.32	3.24	5.02	4.93	4.3	4.30286	3.35	5.501	5.12	6.3555	5.92	6.15	8.04
56	0.134	0.926	0.718333	0.697667	0.77	1.12	1.019	1.32	1.35	0.846	1.28	1.55	1.613	1.94	2.99	2.24	1.282	2.01	2.84	3.31	2.22	3.44024	2.31	2.87	2.43467	3.489	4.49	3.29	3.86	3.86	3.536	3.0094	3.35	4.38	5.11304	4.66	4.2	5.06	4.41	5.44	4.1	5.63866	7.2	5.311	4.69	6.49488	7	9.52	7.9
60	0.062	0.3985	0.717667	0.716333	0.94	2.13	1.71933	1.45	0.905	1.537	1.68	1.48	1.60567	2.04	2.63	2.28	1.998	1.75	3.83	2.6	2.48	2.70366	2.5	2.22	2.097	2.134	3.63	2.85	3.12	3.6	3.664	2.8068	5.28	2.72	5.06087		2.77		4.41	2.99	4.14	3.65329	6.04	4.628	2.54	5.12152	5.61	4.01	6.07
61	0.135	0.709	0.333667	1.02833	0.72	1.26	1.04	1.26	0.99	0.935	1.62	1.4	1.026	1.81	1.79	1.66	1.287	2.48	2.38	1.84	2.99	2.45976	2.99	3.24	1.54333	3.15767	3.01	2.81	2.51	3.29		2.1888	6.07	2.69	3.65652	4.04	3.12	3.39	3.78	3.8	5.02	5.20903	4.7		5.23	4.75809	6.06	6.1	6.28
98	0.411	1.0495	0.609333	2.35733	0.79		1.95433	1.18		1.456	1.47	1.48	2.134	1.9	1.3	2.91	2.014		3.22	2.99	1.86		1.98	1.5	2.89967	2.93367	2.3	4.24	3.85	2.55	3.086	2.5708	3.31	4.6	3.6413	3.24	2.88	3.57	1.21	4.2	2.9	5.09316		4.577	4.97	5.49017	6.95		6.5
143	0.053	0.456	1.08133	1.65333	0.84		1.80533	1.37	1.2	1.332	1.77	1.53	1.86133	1.91	1.77	3.61	2.246		1.36	3.62	1.67		1.75	2.62	3.44867	1.587	2.43	4.05	4.91	2.45	3.288	3.9504	4.66	4.83	3.86957	4.56	5.96	6.33	3.18	6.33	3.44	5.37124	2.05	4.487	5.69	5.58945	4.97		6.65
Mean 10 ELWL	0.1222	0.62235	0.697333	0.957815	0.869	1.24875	1.52981	1.376	1.28362	1.2983	1.515	1.426	1.59993	1.892	1.952	2.107	1.9315	2.55	2.522	2.578	2.389	2.58171	2.476	2.551	2.72822	2.76204	2.95	3.364	3.223	2.922	3.24311	3.04548	4.113	3.792	3.84239	3.69889	3.916	3.9	3.90111	4.648	4.03	4.39188	5.07222	4.67144	4.64	5.07627	5.994	6.085	6.695
Ratio !0/rest	1.19833	0.950933	1.05357	1.20672	0.946034	1.28637	1.20146	0.991286	0.916271	0.922047	1.06851	0.977111	1.10205	0.991503	1.01465	0.974739	0.863024	1.14218	1.06328	1.07151	0.968888	1.03445	0.974392	0.965243	0.996639	0.965088	0.991081	1.11982	1.01421	0.9117	1.01097	0.932112	1.19097	1.06366	1.07599	0.980537	1.0184	0.980742	0.930711	1.0812	0.955506	0.992774	1.11522	1.00829	0.983895	1.02095	1.09515	0.948967	1.0078
Overall advantage	1.024
Highest 10 CSDH lines
17	0.033	0.5015	0.617	0.76	0.97	0.72	1.18967	1.44	1.39	1.092	1.37	1.4	1.75467	1.91	1.96	1.18	1.838	2.37	1.87	2.17	2.56	2.69634	2.56	2.47	2.25533	2.31233	3.35	2.82	3.13	2.73	2.167	3.7696	3.64	3.89	3.72609	5.42	4.38	4.98	3.53	6.59	3.94	4.28652	6.18	3.085	7.28	5.31836	5.29	5.56	6.94
29	0.017	0.69	0.325	0.830333	0.97		1.10933	1.4	0.915	1.483	1.85	1.34	1.133	1.73	1.7	1.39	2.515		2.37	2.6	2.61		2.59	2.58	2.24	2.39033	3.96	2.13	3.48	3.94	3.256	3.369	3.29	4.17	3.73261	1.82	4.27	2.78		5.21	3.7	3.78851	3.68	4.751	6.48	3.74962	5.72		5.6
38	0.061	0.566	0.152667	0.399333	0.72	0.93	0.959667	1.06	1.33	1.4	1.36	1.24	1.25633	1.52	1.17	0.88	2.201	2.05	1.73	1.39	1.55	1.54634	1.49	1.66	1.992	2.447	2.13	2.6	1.58	4.88	1.843	3.0526	2.01	1.62	2.85435	1.59	2.51	1.08	2.94	1.86	4.68	3.2946	4.3	3.728	2.15	2.61553	1.74	4.49	3.96
42	0.008	0.335	0.847667	0	0.81		1.26567	1.17	0.901	1.349	0.85	1.27	1.73133	1.63	0.91		2.2		0.66	1.45	1.85		1.94	1.4	2.01833	2.25533	1.87	2.57		4.96	1.811	2.1464	3.01	3.51	3.39783	2.49	3.85	1.66	0.23	4.35	3.4	1.98437	1.15	3.418	3.04	3.16852	2.4		3.42
63		0.68	0.569667	1.29767	0.83	0.22	0.796333	1.35		1.345	1.56	1.45	2.07533	2.08	1.77	2.88	3.75	1.87	1.31	1.91	2.41	2.98659	2.75	2.7	2.559	2.74233	3.37	2.58	4.01	2.38	1.853	3.506	2.93	4.21	2.63478	4.22	3.3	4.09	4.48	3.64	4.36	4.65117	2.62	3.532	3.85	5.72352	5.97	5.08	6.96
70	0.221	0.5635	0.662667	0.933	0.83	0.68	1.28667	1.29	1.095	2.058	2.06	1.12	1.34933	1.64	2.16	2.12	2.228	2.47	1.85	2.57	1.79	2.38902	2.03	3.18	1.892	2.70367	3.15	3.25	2.45	2.41	3.74	3.629	3.45	3.02	2.51522	4.65	1.89	5.27	3.69	2.3	3.3	3.62998	5.98	4.877	3.52	4.17901	3.9	4.79	6.24
80	0.143	0.5805	0.473667	0.45	0.89		1.02567	1.34	1.446	1.063	1.5	1.47	1.232	1.84	1.63	2.27	2.28		0.92	2.45	2.32	1.89024	2.26	2.95	2.92167	2.74567	2.29	3.45	2.05		3.129	2.308	2.79	3.18	3.12174	2.98	4.4	2.99	3.23	4.03	3.26			5.483	4.46	2.97533	4.21		5.56
86	0.11	0.5515	0.272667	0.771667	1.23	1.5	1.04133	1.54	1.46	1.431	0.86	1.66	1.44933	2.03	1.76	2.59	1.723	2.14	2.23	2.37	2.85	2.26951	2.81	2.93	2.76333	3.20733	3.21	2.38	2.07	2.5	2.36	2.5196	2.4	3.87	2.76304	3.41	3.04	4.19	3.95	3.3	4.54	4.46722	2.93	3.706	3.4	5.16634	4.43	5.93	6.16
90	0.284	1	0.969	0.107667	1.02	0.73	1.80433	1.6	2.42	1.104	1.33	1.76	1.95133	2.29	2.59	2.48	2.99	4.29	2.56	2.46	2.82	3.45366	2.89	3.23	2.80267	3.63567	4.32	3.81	4.19	1.71	5.356	3.9534	2.51	3.6	4.3087	3.87	4.56	4.8	4.91	4.66	4.48	5.74298	5.93	5.733	5	6.02485	7.95	8.47	11.03
144	0.073	0.4265	0.588333	0	0.81	0.2	0.137	1.2	1.45	1.04	0.47	1.37	1.30833	1.65	1.51	1.33	2.357	1.31	1.03	1.31	2.17		2.13	1.66	2.942	1.65533	1.47	2.94	2.29	3.2	1.77	2.5386	1.17		2.75652	1.74	3.31	1.3	$0.6	4.52	3.44	4.13712		3.09	2.7	4.37752	2.95		4.88
Mean 10 ELWL	0.105556	0.58945	0.547833	0.554967	0.908	0.711429	1.06157	1.339	1.37856	1.3365	1.321	1.408	1.5241	1.832	1.716	1.90222	2.4082	2.35714	1.653	2.068	2.293	2.46167	2.345	2.476	2.43863	2.6095	2.912	2.853	2.80556	3.19	2.7285	3.07922	2.72	3.45222	3.18109	3.219	3.551	3.314	3.37	4.046	3.91	3.99805	4.09625	4.1403	4.188	4.32986	4.456	5.72	6.075
Ratio !0/lowest 10	1.15768	1.05581	1.27289	1.7259	0.957048	1.75527	1.44109	1.02763	0.931138	0.971418	1.14686	1.01278	1.04975	1.03275	1.13753	1.10765	0.802051	1.08182	1.52571	1.24662	1.04187	1.04876	1.05586	1.03029	1.11875	1.05845	1.01305	1.17911	1.14879	0.915987	1.18861	0.989043	1.51213	1.09842	1.20789	1.14908	1.10279	1.17683	1.1576	1.14879	1.03069	1.0985	1.23826	1.12829	1.10793	1.17239	1.34515	1.06381	1.10206
																																								M103+N103+O103+Q103+V103+X103+Z103+AA103+AB103+AC103+AD103+AI103+AK103+AM103+AS103+AT103+AX103+BA103+BB103
																																1.426	1.59993	1.892	2.107	2.389	2.476	2.72822	2.76204	2.95	3.364	3.223	3.792	3.69889	3.9	4.67144	4.64	6.695	4.24463
																																0.977111	1.10205	0.991503	0.974739	0.968888	0.974392	0.996639	0.965088	0.991081	1.11982	1.01421	1.06366	0.980537	0.980742	1.00829	0.983895	1.0078	0.989974
																																1.408	1.5241	1.832	1.90222	2.293	2.345	2.43863	2.6095	2.912	2.853	2.80556	3.45222	3.219	3.314	4.1403	4.188	6.075	3.67221
																																1.01278	1.04975	1.03275	1.10765	1.04187	1.05586	1.11875	1.05845	1.01305	1.17911	1.14879	1.09842	1.14908	1.17683	1.12829	1.10793	1.10206	1.15588
																																								D121+E121+F121+G121+H121+I121+K121+L121+U121+AD121+AE121+AF121
																																							0.697333	0.957815	0.869	1.24875	1.52981	1.376	1.2983	1.515	2.578	3.223	2.922
																																							1.05357	1.20672	0.946034	1.28637	1.20146	0.991286	0.922047	1.06851	1.07151	1.01421	0.9117
																																							0.547833	0.554967	0.908	0.711429	1.06157	1.339	1.3365	1.321	2.068	2.80556	3.19
																																							1.27289	1.7259	0.957048	1.75527	1.44109	1.02763	0.971418	1.14686	1.24662	1.14879	0.915987
[truncated: 68 more columns]

## Sheet: ELWLA 0-3h 7-9+F-W plots
			New	New			New						New												New	New
CSDH	Yield/plant_S_Spain99	GrWt/plant/NFF_1994	Yield	dYield 2012	Yield/pl_droughted_Zaj06	Grain_wt/plant_rain_Kaz00adj	dYield 2011	Yield/pl_mn_Droughted_Zaj05	Diff_ear_dwt_SUSTExp2	moddrought_Yield/plant_T14_Krakow08	Yield/plant_sev_dr_Krakow10	Yield/pl_control_Zaj06	cYield 2013	Yield/pl_mn_Rainfed_Zaj05	GrainYd/plant_(Ht_adj)_N1_97	cont_Yield/plant_T35_Krakow08	Regr_adj_Yd/plant_Zaj02	Grain_yd/plant_irrig_Kaz00	Yield/plant_M_Spain99	Yield/plant_sev_drought_Krakow07	Yield/plant_rainfed_Zaj01	Grain_wt/plant/GH/1994	Yield/plant_irrig_Zaj01	GrainYield/plant_N2_97	cYield 2011	cYield 2012	GrainYd/plant_(Ht_adj)_N3_97	Yield/plant_cont_Krakow10	Yield/plant_mod_drought_Krakow07	Grain_yd/plant_A_Kaz98	Yield/plant_rain_Zaj00	Consel 2003(50pl/row)	Vern_Total_yield/pl_Krakow06	Yield/plant_control_Krakow07	Grain_wt/plant/Mor_1994	75ppb_Mn_Grain_wt/pl_03	GrainYd/plant_(Hr_adj)_N1_98	NFA_Mn_Grain_wt/pl_03	Non-vern_Total_yield/pl_Krakow06	GrainYd/plant_(Ht_adj)_N2_98	Conselice_Yield/plant_04	Yield_g/plant_adj(2,80)_Idice03	Grain_yd/plant_B_Kaz98	Yield/plant_irrig_Zaj00	GrainYield/plant_N3_98	Idice_Mn_Yield/plant_13%_04	Total_yield/plant_75ppb_05	Grain_yd/plant_A_Kaz99	Total_yield/plant_NFA_05
Mean	0.10375	0.652566	0.665461	0.810144	0.914526	1.00081	1.29895	1.38747	1.39001	1.39573	1.42819	1.45558	1.46676	1.90537	1.92421	2.1556	2.20612	2.26689	2.414	2.42426	2.45568	2.47	2.53432	2.63168	2.7365	2.85196	2.98116	3.04234	3.18269	3.19613	3.22173	3.25	3.52191	3.59	3.61	3.76682	3.86095	3.97202	4.081	4.34189	4.42	4.437	4.57978	4.64389	4.71242	4.96578	5.53	6.37733	6.64989
1	0.23	0.4505	0.521333	0.617	0.8	1.21	1.835	1.14	0.87	1.568	1.38	1.48	1.28067	1.63	2.15	2.74	1.796	3.05	4.03	3.51	1.96	1.96951	2.13	2.37	2.53367	3.38633	2.69	2.63	2.1	3.03	2.875	3.58	3.3	3.32	2.88696	3.73	1.93	3.71	4.16	3.81	3.7	4.3129	2.18	3.231	4.68	4.58993	3.81	8.23	5.83
2	0.272	0.7545	0.591	1.577	0.87	0.28	1.96833	1.38	1.091	1.552	2.38	1.58	1.97033	1.93	1.64	2.04	1.43	2.6	4.97	2.62	2.19	2.51829	2.39	2.47	1.62667	2.83067	2.92	3.29	2.68	4.48	3.482	3.0118	2.82	3.84	3.5413	3.33	2.85	2.62	3.9	4.02	4.86		2.92	4.965	4.8	4.87399	6.39	9.2	7.22
3	0.036	0.4005	0.727667	0.489333	0.92		1.10467	1.41	0.954	1.351	0.49	1.53	1.601	2.17	1.59	2.55	2.873	1.46	1.38	2.1	2.78	2.15122	2.75	2.72	3.99867	3.323	2.17	3.04	4.1	3.76	2.795	3.0752	3.37	3.3	3.35217	2.76	5.35	3.33	2.49	5.99	5.58	5.99969	4.86	5.222	4.54	5.12926	5.05	5.52	6.93
4	0.107	0.636	0.434	0.913667	0.81		1.59167	1.19	0.891	1.861	1.86	1.4	1.78067	1.84	1.93	2.14	1.865		2.5	3	2.01		2.28	2.26	3.74933	3.34567	2.54	2.86	3.19	3.37	3.154	3.9092	3.02	3.1	2.7413	2.73	3.08	2.24	2.12	3.36	2.7	3.65657	1.77	5.892	6.75	3.76945	4.49		3.76
5	0.06	0.696	0.718667	0.560333	0.98	0.82	1.40633	1.41	2.079	1.464	1.27	1.45	1.562	1.73	1.62	3.21	2.585	1.92	1.19	2.87	2.1	3.20488	2.29	2.53	2.56833	3.288	2.77	3.49	4.95	7.34	3.27	3.393	6.43	5.25	3.7413	4.48	2.9	5.18	7.46	3.17	4.16	3.9775	6.14	4.23	3.89	7.31431	7.83	3.84	8.12
8		0.72	0.818333	0.629	1.09	0.59	1.857	1.45	1.635	1.745	0.9	1.65	1.38633	1.98	1.91	2.65	2.292		1.68	2.61	3.13	2.79512	3.08	2.48	3.53733	4.328	3.57	2.65	4.43	2.13	3.292	3.4404	4.17	3.71	3.42174	6.26	3.24	5.38	1.67	3.52	5.56	5.23404	9.22	4.41	4.54	5.8574	6.48	6.3	8.29
10	0.015	0.9375	0.86	0.0413333	1.02	0.31	1.45133	1.51	1.709	1.349	1.64	1.63	1.694	2.35	2.72	2.52	2.839	1.6	1.69	1.46	2.93	3.62195	3.16	3.6	2.874	2.21533	4.27	1.42	3.8	5.16	4.269	4.7688	2.37	3.96	3.76087	4.6	4.84	4.14	5.73	5.23	5.72	4.46791	6.6	6.965	5.06	4.60256	6.9	5.07	7.71
11	0.135	0.5825	0.403	0.654333	0.85	0.72	1.28433	1.48	1.28	1.235	1.36	1.55	1.42767	2.04	1.77	2.76	1.469	1.13	1.99	2.81	2.86	1.7	2.81	2.74	3.124	2.71533	3.77	2.5	3.95	3.94	2.631	4.7336	2.27	4.75	3.55217	3.73	4.03	3.72	5.12	4.09	3.66	3.54706	5.07	4.685	5.34	3.77902	4.54	5.19	5.64
12	0.147	0.34			0.95	0.62		1.52	1.52	1.31	1.36	1.53		1.92	1.82	1.6	2.803	2.2	4.27	1.78	2.12	2.52927	2.35	2.14			2.82	2.9	4.12	3.36	3.582	1.99	3.37	4.39	5.17174	5.11	3.86	5.67	3.28	4.14	5.64	5.48299	6.35	4.825	4.85	7.60159	6.12	6.56	6.5
13	0.316	1.026	0.673333	0.989667	0.89	1.3	1.97733	1.31	1.15	1.783	2.03	1.34	1.82933	1.96	2.23	1.56	3.47	3.53	0.94	2.75	2.54	3.28415	2.51	2.81	2.4	3.29833	5.16	3.05	3.62	2.83	3.183	3.0824	4.18	5.2	4.32391	5.26	3.72	4.77	2.75	4.64	3.16	5.22546	3.91	4.822	4.41	5.88681	6.13	8.35	7.04
14	0.043	0.7785	0.932667	0.721667	0.82	0.24	1.60067	1.17	1.305	0.892	1.84	1.3	1.72167	1.68	1.47	1.48	2.296	1.67	2.64	2.32	1.88	2.37195	1.96	3.18	2.969	3.30567	2.85	2.11	2.25	3.3	2.44	3.946	1.96	2.96	2.73043	4.09	4.77	3.59	5.26	4.78	3.56	5.50026	6.42	4.052	4.22	6.08465	5.19	6.3	5.98
15	0.113	0.5495	1.02067	1.67433	1.2	0.26	1.64533	1.58	1.705	1.31	1.39	1.66	1.6	2.16	1.46	2.25	2.054	1.11	3.3	2.35	2.83	1.86098	2.86	2.41	2.63867	2.608	2.7	2.45	2.94	2.83	3.55	3.7138	3.26	3.13	4.13913	3.55	4.93	5.3		4.54	4.58	5.0598	6.24	4.972	4.63	5.05517	6.74	4.82	7.32
16	0.088	0.33			0.93	0.84		1.33	1.215	1.684	1.7	1.18		1.72	1.92	2.39	1.997	2.37	1.41	2.71	2.86	1.83293	2.83	2.38			3.12	3.97	2.18	2.63	2.243	3.335	4.56	3.22	4.11304	5.23	1.87	5.52	3.55	2.81	2.22	3.48927	6.29	3.844	3.38	3.59811	6.01	3.99	8.17
17	0.033	0.5015	0.617	0.76	0.97	0.72	1.18967	1.44	1.39	1.092	1.37	1.4	1.75467	1.91	1.96	1.18	1.838	2.37	1.87	2.17	2.56	2.69634	2.56	2.47	2.25533	2.31233	3.35	2.82	3.13	2.73	2.167	3.7696	3.64	3.89	3.72609	5.42	4.38	4.98	3.53	6.59	3.94	4.28652	6.18	3.085	7.28	5.31836	5.29	5.56	6.94
18	0.207	0.786	0.397	0.853667	1.24	2.98	1.41867	1.62	2	1.501	1.16	1.71	1.821	2.16	2.68	1.93	3.069	1.98	1.68	2.15	3.4	2.84268	3.75	4.05	3.69733	3.94467	4.33	3.37	4.13	4.49	3.648	4.4896	4.58	4.91	3.7	4.09	4.2	2.73	4.47	5.18	4.1	5.75226	3.21	5.281	5.29	4.75296	4.4	6.43	6.82
19	0.09		0.621	1.62767	0.86	1.5	1.76433	1.33	1.019	1.287	1.34	1.43	1.36733	1.84	2.15	2.21	1.989	2.35	2.95	1.86	2.02		2.29	2.9	3.24467	3.12233	2.11	3.14	3.51	3.76	3.881	3.4462	2.88	3.27		3.88	2.94	5.18	3.03	5.75	5.18	4.28518	4.6	5.48	3.38	5.36436	5.98	5.62	7.38
20	0.124	0.6275	0.980667	1.48067	1.01	0.47	1.31267	1.58	1.077	1.155	1.93	1.56	1.81767	2.11	2.62	2.28	2.569	2.2	3.09	3.59	2.91	3.25	2.97	3.53	2.53233	2.31833	3.77	3.48	3.26	2.24	3.8	4.6176	4.97		3.98913	4.47	3.83	5.03		5.49	3.86	5.44696	2.62	4.676	6.52	5.9214	5.46	6.11	7.68
21	0	0.8675	0.822667	0.811	0.85	1.6	0.541667	1.4	1.83	1.653	1.53	1.53	1.46433	1.98	2.35	2.02	2.014	2.49	1.13	2.47	2.74	3.34146	2.8	3.01	2.053	2.99833	3.21	2.92	3.02	1.91	2.704	3.3638	5.48	2.49	4.38478	4.63	3.02	4.38	7.15	3.73	2.92	4.04284	5.46	4.223	3.85	5.21892	5.66	7.39	6.21
22	0.097	0.7875	1.04567	0.532667	1.17	1.29	1.37567	1.55	1.565		1.51	1.82	1.647	2.01	2.63	1.74	2.042	2.1	3.01	2.16	2.99	2.61829	2.93	3.07	3.88267	3.606	4.44	3.12	2.55	3.94	2.964	3.2696	3.04	4.09	3.80435	5.39	6.57	4.41	4.36	6.23	6.16	4.69	4.2	4.596	5.71	6.66022	6.02	7.11	7.01
24	0.211	0.482	1.35667	0.843	1.1	1.11	1.81167	1.59	1.529	1.837	1.57	1.72	2.081	2.25	1.7	1.78	2.652	3.33	2.63	3.35	3.4	2.52317	3.4	2.95	3.68367	4.16067	3.68	3.16	4.47	4.28	3.458	4.7666	2.89	5.29	4.55	3.65	5.26	2.73	5.46	4.31	4.46	4.63479	5.04	5.401	6.47	4.85885	6.86	10.76	6.78
25	0.061	0.786	1.041	1.54933	0.9		1.15267	1.44	1.08	1.687	1.27	1.47	1.86	1.93	1.59	2.23	3.231		2.03	2.12	1.57		1.93	1.91	3.77533	3.764	1.75	3.69	2.95	1.15	3.065		2.91	3.64	1.31304	2.98	2.6	3.31	2.06	3.99	4.62	4.90278	1.15	4.869	4.65	4.45915	5.87		6.06
27	0.042		0.716	0.515667	1.03	0.52	1.126	1.39	0.989	1.387	1.57	1.26	1.06867	1.77	1.51	1.49	2.318	2.92	3.21	2.23	2.4	2.37927	2.54	2.03	2.42533	3.40533	2.45	2.62	3.61	2.92	2.621	2.8182	3.82	3.59	3.64565	4.03	3.99	3.89	3.42	3.53	3.62	3.48089	4.31	3.154	4.55	4.04054	5.62	7.38	6.27
28	0.24	0.688	0.786	1.24367	0.91	0.92	0.207667	1.43	1.211	0.616	1	1.42	1.765	1.82	1.63	1.34	2.005		5.51	2.29	2.55	1.87805	2.55	3.37	3.03133	1.53333	1.36	2.43	2.17	3.78	3.271	3.0662	2.73		5.84565	2.66	4.27	3.29	3.83	6.09	4.98	5.12523	4	5.305	6.11	6.10168	4.43	3.69	4.72
29	0.017	0.69	0.325	0.830333	0.97		1.10933	1.4	0.915	1.483	1.85	1.34	1.133	1.73	1.7	1.39	2.515		2.37	2.6	2.61		2.59	2.58	2.24	2.39033	3.96	2.13	3.48	3.94	3.256	3.369	3.29	4.17	3.73261	1.82	4.27	2.78		5.21	3.7	3.78851	3.68	4.751	6.48	3.74962	5.72		5.6
30	0.225	0.6095	0	0.508333	0.89	1.62	1.20033	1.41	1.809	1.377	1.6	1.31	1.05267	1.72	2.1	1.88	1.359	1.68	4.27	1.92	2.79	2.66341	2.74	2.52	1.794	2.60967	3	2.24	3.34	2.02	3.196	2.6772	2.79	3.08	2.92174		2.91		5.53	3.03	2.72	5.0432	5	3.563	6.17		5.33	6.33	7.79
31	0.034	0.592	0.358333	0.445	1.3		1.467	1.77	1.821	1.37	1.61	1.87	1.51733	2.42	1.83	2.11	2.475		1.95	2.78	3.27	2.46341	3.41	3.1	3.55433	2.58567	3.32	3.69	4.32	2.6	4.393	2.5646	4.53	4.7	2.94783	2.38	4.56	3.46	2.84	4.39	3.92	4.6969	2.32	5.68	5.22	5.03851	6.38		7.73
32	0.141	0.878	0.549667	0.728333	0.95	0.59	1.703	1.59	1.585	1.513	1.15	1.55	1.66667	2.09	1.97	1.97	5	1.86	3.12	2.93	2.4	1.84634	2.61	2.37	3.22033	2.66733	2.77	3.58	3.83	5.31	3.829	3.5294	4.92	2.94	4.5587	4.66	3.98	4.48	4.16	4.53	2.58	5.15443	4.82	4.963	4.27	5.16812	6.59	5.1	7.3
33	0.187	0.8945	0	0.333333	0.98	1.83	2.06167	1.61	1.445	1.493	1.91	1.67	1.502	2.36	2.55	2.55	1.976	4.04	3.31	2.86	2.46	2.77439	2.54	2.8	2.52367	3.07233	3.22	2.84	3.97	5.72	3.708	3.2324	1.89	4.16	4.15217	3.99	4.38	3.86	4.39	4.14	3.24	3.48416	5.57	4.323	3.97	5.42744	5.38	10.44	6.72
34	0.158	0.6125	0.559333	0.479667	0.84	0.67	0.642333	1.26	1.299	1.581	1.03	1.31	1.201	1.61	1.59	1.91	1.018	2.32	2.5	1.93	2.88	2.02195	2.89	1.9	2.69933	2.41033	2.58	2.67	2.38	1.84	2.355	2.7458	3.54	2.12	1.73913	2.28	2.72	2.94	5.31	3.57	3.24	3.75713	2.93	4.607	2.93	3.33536	4.97	4.13	4.7
35	0.028	0.5425	0	0.674	0.86	1.24	0.922	1.29		1.397	1.43	1.39	0.87	1.73	2.26	1.75	1.784	1.55	0.56	2.21	1.73	2.73902	1.93	1.85	2.078	2.055	2.31	3.52	2.77	3.1	2.469	3.3914	3.15	2.96	2.27391		3.06		4.52	3.37	4.84	4.89862	2.55	2.727	3.06	4.85257	4.99	5.68	5.46
36	0	0.587	0.297333	0.201	0.96	0.1	0.424667	1.34	1.345		1.26	1.51	0.871	1.72	2.04	1.9	1.792		1.11	2	3.01	1.20976	2.97	2.91	2.88633	2.598	2.98	2.52	2.58	3.48	2.374	3.428	3.39	2.79	3.80652	2.05	5.57	2.33	2.45	4.55	3.48	3.48354	4.94	3.803	4.46	3.83419	4.43	6.75	6.33
37	0.136	0.696	0.701333	0.566667	0.88	1.44	0.505	1.3	1.45	1.346	1.31	1.37	0.854667	1.71	1.84	1.76	1.508	1.94	0.93	2.09	2.66	1.4622	2.57	2.5	2.51467	2.81167	3.59	2.33	2.19	5.22	2.61	3.3076	3.36	2.5	2.64565	3.28	3.56	4.55	4.43	3.83	3.86	4.72012	10.84	4.409	4.34	4.59078	5.79	5.45	5.71
38	0.061	0.566	0.152667	0.399333	0.72	0.93	0.959667	1.06	1.33	1.4	1.36	1.24	1.25633	1.52	1.17	0.88	2.201	2.05	1.73	1.39	1.55	1.54634	1.49	1.66	1.992	2.447	2.13	2.6	1.58	4.88	1.843	3.0526	2.01	1.62	2.85435	1.59	2.51	1.08	2.94	1.86	4.68	3.2946	4.3	3.728	2.15	2.61553	1.74	4.49	3.96
39	0.093	0.693	1.36333	0.649333	0.84	0.86	1.37133	1.39	1.375	1.702	1.62	1.5	1.59567	1.84	2.31	1.47	1.412	2.41	2.91	2.76	2.18	3.05488	2.32	4.09	2.35867	2.867	2.87	3.32	3.27	3.09	3.88	2.7348	4.75	2.68	3.30652	5.62	3.73	4.69	3.71	4.03	4.42	3.95446	4.74	4.025	3.24	6.20766	6.04	6.22	7.87
40	0.143	0.47	0.662	0.478667	0.72	0.3	1.412	1.02	1.09	1.19	1.75	1.14	1.18567	1.41	1.89	1.34	1.51	1.01	1.82	2.16	1.59	2.67317	1.53	2.46	2.23	2.02567	3.4	2.41	3.27	2.46	1.8	2.7388	2.76	2.5	4.07826	2.44	2.39	2.52	2.68	2.58	2.92	3.95261	3.58	3.513	2.82	3.6314	3.55	3.54	5.26
41	0.069	0.325	0.602	0.0983333	0.86	0.12	1.39033	1.43	1.215	1.177	1.2	1.37	1.457	1.89	1.35	1.15	1.764	3.17	3.8	1.25	2.73		3.05	1.17	2.824	1.63033	1.6	2.68	2.47	4.24	2.73	2.5958	1.26	1.75	2.83043	0.99	5.2	1.33	0.56	7.02	4.06	2.5103	3.08	4.468	5.64	3.67989	4.96	3.86	3.6
42	0.008	0.335	0.847667	0	0.81		1.26567	1.17	0.901	1.349	0.85	1.27	1.73133	1.63	0.91		2.2		0.66	1.45	1.85		1.94	1.4	2.01833	2.25533	1.87	2.57		4.96	1.811	2.1464	3.01	3.51	3.39783	2.49	3.85	1.66	0.23	4.35	3.4	1.98437	1.15	3.418	3.04	3.16852	2.4		3.42
44	0.018	0.419			0.92	1.28		1.38	1.319	1.891	1.35	1.29		1.7	2.21	0.75	1.849	2.48	1.2	3.22	2.92	2.36585	3	2.72			3.57	3.59	3.89	4.24	3.074	3.6634	3.18	4.85	2.64783	3.87	5.26	3.3	7.13	4.1	5.4	5.56551	5.66	4.564	4.13	6.21697	4.15	5.47	5.62
45	0.1	0.7105	0.593	1.04967	0.82		1.65567	1.26	1.6	1.368	0.93	1.51	1.52833	1.8	1.77		1.139		2.79	2.19	1.76		1.92	2.44	2.57833	2.931	2.89	2.26	2.89	4.96	3.541	3.8778	5.2	3.48	4.55435	2.52	2.82	4.32	2.78	4.24	2.32	3.18281	3.92	4.636	3.16	5.49529	5.45		7.03
46	0.113	0.9125	0.806667	0.747667	0.89	0.53	1.64967	1.42	1.68	1.325	1.19	1.36	1.46667	1.8	2.62	2.45	1.567	2.51	2.13	3.13	1.69	3.45976	1.74	3.28	2.393	3.49967	3.56	2.93	3.88	1.68	3.526	2.6952	4.62	3.61	3.6587	6.05	3.26	5.42	4.8	4.07	5.12	3.94689	8.07	4.547	4.52	5.60503	6.76	8.15	8.59
47	0.319	0.7645	0.728333	0.522333	0.81	1.12	1.185	1.28	1.606	0.835	1.22	1.26	1.41167	1.71	1.54	1.52	2.166	1.73	3.01	1.37	2.32		2.4	2.19	2.44833	2.52067	2.38	2.99	1.98	4.96	2.511	4.5988	1.59	1.93	2.73913	1.41	4.46	1.43	2.87	5.64		4.81501	2.49	3.371	4.92	3.9696	3.24	4.26	4.6
48	0.012	0.45	0.972333	0.592	0.85	0.63	1.392	1.46	1.709	1.203	1.3	1.63	1.49433	2.21	2.15	2.57	3.376	1.51	1.34	2.69	2.41	3.27439	2.66	2.99	3.42133	2.77267	3.18	3.55	4.27		3.979	3.4534	4.43	4.14	4.13478	5.07	5.32	3.23	6.08	5.19	5.02	5.83075	4.28	5.791	5.84	5.26098	6.86	8.82	7.33
49	0.064	0.4	1.122	0.380333	0.8	0.94	1.21567	1.15	1.049	0.622	1.08	1.42	1.64933	1.6	1.17	1.68	2.42	4.26	1.86	0.75	1.69	1.93415	1.64	1.69	2.63833	1.51867	1.93	2.7	1.65	5.22	1.969	3.2958	1.51	1.38	1.70652	1.76	4.02	2.39	1.98	3.13	3.6	3.00819	6.78	3.44	5.45	2.56613	3.02	7.27	4.46
50	0.062	0.4545	0.941667	0.409333	0.94	0.47	0.755	1.48	1.09	0.928	1.18	1.48	1.123	1.9	1.36	2.5	2.156	2.3	1.95	2.45	2.7	2.7	2.87	1.61	1.93	2.438	2.23	2.44	3.28	3.48	2.419	3.1034	3.57	3.23	4.41304	1.72	4.63	3.7	3.51	5.95	3.7	4.11155	6.49	3.292	4.74	4.82998	9.57	7.22	5.79
51	0.044	0.6965	1.34933	0.411	0.88	0.31	1.932	1.47	1.519	1.325	1.19	1.58	1.703	2.1	2.52	2.22	2.027	3.32	1.43	2.58	2.18	3.41585	2.24	3.19	2.47633	2.94933	3.53	3.95	3.54	3.1	2.656	2.7754	4.34	4.51	5.31522	3.87	3.61	5.12	4.62	4.09	4.96	3.79341	5.17	3.336	5.28	5.25232	5.89	7.78	9
55	0.063	0.6665	0.61	0.486667	0.75		1.50567	1.27	1.525	1.385	1.26	1.44	0.968	1.83	1.99	1.25	1.608		2.95	1.98	2.16		2.15	2.83	3.111	2.44333	2.94	1.96	3.59	3.11	2.873	2.9238	2.88	3.37	3.31739	3.02	3.42	3.93	1.58	4.66	3.64	2.91278	2.65	4.553	4.3	5.58329	3.99		6.07
56	0.134	0.926	0.718333	0.697667	0.77	1.12	1.019	1.32	1.35	0.846	1.28	1.55	1.613	1.94	2.99	2.24	1.282	2.01	2.84	3.31	2.22	3.44024	2.31	2.87	2.43467	3.489	4.49	3.29	3.86	3.86	3.536	3.0094	3.35	4.38	5.11304	4.66	4.2	5.06	4.41	5.44	4.1	5.63866	7.2	5.311	4.69	6.49488	7	9.52	7.9
57	0.152	0.3965	1.523	0.974	0.9	1.34	1.33633	1.39	1.014	1.074	1.87	1.45	1.65433	1.94	2.04	1.45	2.371	1.86	0.94	1.95	2.84	2.71341	3.03	2.24	2.28167	2.81333	1.91	2.84	3.89	2.97	3.129	3.7096	2.56	4.66	4.27391	4.65	3.51	4.69	4.61	3.3	4.32	4.48291	8.36	5.261	4.56	5.98191	7.17	5.97	7.95
58	0.253	0.809	0.655333	1.345	0.97	1.52	2.061	1.53	1.42	1.837	1.64	1.67	1.55733	2.22	2.16	2.89	2.756	3.47	3.99	2.97	2.73	2.40732	2.83	3.3	2.397	2.41967	3.51	3.71	3.82	2.95	4.338	3.6502	4.92	4.08	4.12609	4.66	4.61	5.69	3.72	4.11	6.58	4.29138	7.31	5.605	4.91	6.66661	7.34	9.9	8.81
59	0	0.3365	0.860333	0.756	0.64	0.48	0.599	0.93		1.472	1.21	0.95	1.46733	1.17	1.47	1.94	1.398	1.65	3.22	2.78	1.14		1.36	1.79	1.78933	2.55067	2.52	2.5	2.53	3.83	3.346	2.7812	1.9	2.89	2.82826		2.37		3.75	2.18	5.72	3.23484	3.83	4.975	2.64	5.50334	4.72	6.96	4.87
60	0.062	0.3985	0.717667	0.716333	0.94	2.13	1.71933	1.45	0.905	1.537	1.68	1.48	1.60567	2.04	2.63	2.28	1.998	1.75	3.83	2.6	2.48	2.70366	2.5	2.22	2.097	2.134	3.63	2.85	3.12	3.6	3.664	2.8068	5.28	2.72	5.06087		2.77		4.41	2.99	4.14	3.65329	6.04	4.628	2.54	5.12152	5.61	4.01	6.07
61	0.135	0.709	0.333667	1.02833	0.72	1.26	1.04	1.26	0.99	0.935	1.62	1.4	1.026	1.81	1.79	1.66	1.287	2.48	2.38	1.84	2.99	2.45976	2.99	3.24	1.54333	3.15767	3.01	2.81	2.51	3.29		2.1888	6.07	2.69	3.65652	4.04	3.12	3.39	3.78	3.8	5.02	5.20903	4.7		5.23	4.75809	6.06	6.1	6.28
63		0.68	0.569667	1.29767	0.83	0.22	0.796333	1.35		1.345	1.56	1.45	2.07533	2.08	1.77	2.88	3.75	1.87	1.31	1.91	2.41	2.98659	2.75	2.7	2.559	2.74233	3.37	2.58	4.01	2.38	1.853	3.506	2.93	4.21	2.63478	4.22	3.3	4.09	4.48	3.64	4.36	4.65117	2.62	3.532	3.85	5.72352	5.97	5.08	6.96
64	0.115	0.7015	0.921333	1.07867	0.95	1.34	1.30733	1.37	0.985	1.658	1.61	1.33	1.51667	1.95	2.17	3.06	1.851	2.13	1.7	2.6	2.71	2.59756	2.73	2.86	3.31733	3.08867	3.25	2.71	2.4	2.09	3.508	3.7104	2.94	2.29	4.33478	4.52	4.28	3.72	4.24	4.15	4.78	4.49007	5.28	5.609	4.95	5.932	4.17	6.74	6.15
65	0.083	1.0225	0.817333	1.838	1.06	1.77	0.793667	1.58	1.475	1.379	1.98	1.41	1.50133	1.98	1.76	2.97	3.418	1.77	2.12	1.62	2.08	$0	2.18	2.91	1.92767	2.77267	3.73	3.32	3.74	4.05	4.003	2.9952	4.75	3.83	4.13261	4	3.54	5.61	4.51	4.89	3.86	4.39131	3.71	4.4	4.97	4.53938	6.21		7.25
66	0.077	0.6465	0.324333	0.66	0.91	2.23	1.76567	1.39		1.275	1.6	1.25	1.53067	1.96	2.39	2.7	2.766	2.41	1.74	2.03	3.17	2.51951	3.14	3.3	3.68667	4.413	3.3	3.68	3.31	4.68	4.064	2.2626	2.3	3.74	4.46087		3.82	5.55	3.24	5.22	4.7	3.47578	6.26	5	5.94	6.59862	6.48	6.32	8.99
67	0.348	0.775	0.506667	0.648	0.71	0.99	1.72967	1.24	1.075	1.405	1.07	1.36	1.529	1.66	2.11	2.76	1.448	2.17	3.43	2.81	2.37	2.81463	2.4	2.17	2.719	2.68	2.43	3.35	3.15	2.48	3.518	3.1558	4.38	3.18	3.36304	4.6	3.13	5.21	3.75	3.69	4.02	3.85249	2.95	4.442	4.6	4.15485	5.97	4.69	7.36
69	0.054	0.743	0.723333	1.96967	0.99		1.84367	1.54	1.219	1.321	0.96	1.44	1.59233	2.03	2	1.64	3.569		1.58	2.86	2.66	0	2.62	3.29	3.54	3.10167	2.46	2.6	2.72	3.34	3.028	3.4966	2.82	3.85	4.0587	3.7	3.9	4.9	3.08	5.43	4.08	5.66044	1.6	3.811	5.7	5.11739	3.21		7
70	0.221	0.5635	0.662667	0.933	0.83	0.68	1.28667	1.29	1.095	2.058	2.06	1.12	1.34933	1.64	2.16	2.12	2.228	2.47	1.85	2.57	1.79	2.38902	2.03	3.18	1.892	2.70367	3.15	3.25	2.45	2.41	3.74	3.629	3.45	3.02	2.51522	4.65	1.89	5.27	3.69	2.3	3.3	3.62998	5.98	4.877	3.52	4.17901	3.9	4.79	6.24
71	0.102	0.9655	0.681667	1.70733	0.81	0.34	1.69767	1.31	1.58	1.997	1.22	1.5	1.985	1.85	2.06	2.94	1.857	2.05	2.96	1.93	2.19	2.66098	2.27	2.19	2.54033	3.284	4	4.11	4.27	2.87	3.537	2.8766	5.17	4.81	5.94783	4.84	2.82	4.33		4.39	3.54	5.08724	5.8	4.357	4.02	5.66927	5.67	9.25	7.05
72	0.095	0.452	0.414667	0.792333	0.74	1.22	1.09733	1.12	1.386	1.727	1.37	1.03	1.27867	1.43	1.69	2.38	1.82	1.43	1.79	1.79	2.1	1.9	2.08	1.98	2.105	2.768	2.35	3.16	1.98	1.48	2.53	3.7254	4.67	2.43	3.41522	4.34	2.33	4.35	5.88	2.24	4.34	3.96407	3.8	3.889	2.23	3.08222	4.24	6.17	6.23
80	0.143	0.5805	0.473667	0.45	0.89		1.02567	1.34	1.446	1.063	1.5	1.47	1.232	1.84	1.63	2.27	2.28		0.92	2.45	2.32	1.89024	2.26	2.95	2.92167	2.74567	2.29	3.45	2.05		3.129	2.308	2.79	3.18	3.12174	2.98	4.4	2.99	3.23	4.03	3.26			5.483	4.46	2.97533	4.21		5.56
86	0.11	0.5515	0.272667	0.771667	1.23	1.5	1.04133	1.54	1.46	1.431	0.86	1.66	1.44933	2.03	1.76	2.59	1.723	2.14	2.23	2.37	2.85	2.26951	2.81	2.93	2.76333	3.20733	3.21	2.38	2.07	2.5	2.36	2.5196	2.4	3.87	2.76304	3.41	3.04	4.19	3.95	3.3	4.54	4.46722	2.93	3.706	3.4	5.16634	4.43	5.93	6.16
87	0.075	0.659	0.927333	0.82	1.06	0.52	1.245	1.55	1.7	1.588	1.5	1.77	0.948	2.28	1.76	2.18	2.887	1.61	2.6	2.82	3.06	1.91707	2.8	3.29	3.62167	3.01867	3.06	3.16	2.98	1.27	4.53	3.7874	1.74	3.28	4.75652	3.13	3.45	3.95	7.31	3.5	4	4.37787	5.67	5.368	4.16	4.82717	5.23	6.23	7.1
88	0.055	0.368	0.645333	0.776	1	2.42	0.524667	1.49	1.59	1.29	1.39	1.49	1.37867	1.99	2.29	2.14	2.105	2.08	1.42	2.59	2.87	3.32073	2.88	2.94	2.43867	2.36667	2.51	3.38	3.12	1.26	3.238	2.5024	3.8	3.52	3.41522	3.63	3.27	5.41	6.41	3.88	4.78	4.84951	3.71	4.849	4.76	6.72609	6.74	7.14	6.64
90	0.284	1	0.969	0.107667	1.02	0.73	1.80433	1.6	2.42	1.104	1.33	1.76	1.95133	2.29	2.59	2.48	2.99	4.29	2.56	2.46	2.82	3.45366	2.89	3.23	2.80267	3.63567	4.32	3.81	4.19	1.71	5.356	3.9534	2.51	3.6	4.3087	3.87	4.56	4.8	4.91	4.66	4.48	5.74298	5.93	5.733	5	6.02485	7.95	8.47	11.03
91	0.072	0.612	0.822667	0.123667	1.03	0.25	1.18167	1.62	1.7	1.189	1.65	1.57	1.58367	2.17	2.2	1.67	2.639	3.89	1.69	2.07	3.72	1.51829	3.99	2.64	2.79033	2.77133	3.45	3.46	3.11	3.19	4.685	4.1784	5.84	4.17	2.11739		4.62		6.93	4.5	3.84	5.10172	4.31	5.134	4.57	3.9102	7.49	6.06	7.9
92	0.03	0.4645	0.325	0.217667	0.88	1.76	0.803333	1.35	1.399	1.584	1.67	1.23	0.857667	1.72	1.83	1.27	1.418	1.95	2.11	2.92	2.46	1.83415	2.4	2.38	2.10333	2.483	3.48	1.99	2.82	2.55	3.082	3.1038	3.84	3.34	2.1413	3.31	3.93	2.84	4.69	3.22	4.46	3.66045	1.56	5.156	5.2	4.88765	6.05	6.63	5.98
93	0.071	0.4825	0.634667	0.529333	1.16	0.65	1.402	1.62	1.26	1.377	1.49	1.76	1.21567	2.36	2.4	2.08	3.015	2.35	2	2.31	2.93	3.73415	2.85	2.87	2.15867	3.59233	3.71	2.22	3.53	3.33	4.643	3.5184	4.22	3.54	4.0087	3.9	2.99	4.71	4.9	3.31	3.84	4.03763	4.52	5.608	4.91	4.67829	5.94	9.02	6.72
94	0.033	0.6235	0.106667	0.0823333	0.76	0.45	0.386667	1.28	1.109	0.995	0.66	1.34	0.899667	1.78	1.69	1.71	0.731	1.02	3.42	1.76	2.17	2.58293	2.28	2.17	2.14333	2.64467	1.64	2.81	2.61	1.59	3.359	2.4722	3.55	3.53	3.48696	2.52	3.21	3.5	4.79	3.1	4.92	3.14145	5.27	4.409	5.09	5.72642	3.07	7.01	5.01
96	0.12	0.794			0.82	3.14		1.2		1.492	1.74	1.41		1.88	2.18	2.89	2.055	3.18	4.58	2.46	1.91	2.58537	2.01	2.65			4.23	2.45	2	2.14		2.9606	4.06	3.79	4.23478		4.03		5.93	3.58	4.68	4.85012	3.47	4.657	4.02	4.60331	5.67	8.13	6.96
97	0.021	0.7675	0.482333	0.369333	0.69	1.28	1.60967	1	1.365	1.413	1.13	1.38	1.30033	1.65	2.12	2.67	1.207	1.99	1.87	2.65	1.93	2.9	2	2.6	2.41767	3.24533	2.3	3.74	3.12	3.19	2.444	2.8756	3.36	3.99	1.49565	4.77	3.65	5.34	4.92	3.44	2.82	3.55923	8.2	3.797	3.85	6.2858	6.59	2.9	6.67
98	0.411	1.0495	0.609333	2.35733	0.79		1.95433	1.18		1.456	1.47	1.48	2.134	1.9	1.3	2.91	2.014		3.22	2.99	1.86		1.98	1.5	2.89967	2.93367	2.3	4.24	3.85	2.55	3.086	2.5708	3.31	4.6	3.6413	3.24	2.88	3.57	1.21	4.2	2.9	5.09316	$0.55	4.577	4.97	5.49017	6.95		6.5
99	0.013	0.516	0.493	0.440333	0.8	0.49	1.18633	1.18	1.535	1.232	1.42	1.41	1.36833	1.75	1.69	2.71	1.526	0.81	1.8	2.37	2.24	3.36585	2.26	2.25	3.366	2.51233	2.23	3.39	3.5	3.33	3.052		4.78	3.96	3.33913	4.41	2.46	4.16	5.44	3.65	3.08	4.00669	4.46	5.085	3.13	4.52443	6.69	4.58	7.5
102	0.1	0.9335	0.259667	0.834667	0.95		1.34567	1.46	1.521	1.244	1.24	1.67	1.527	2.23	2.16	3.15	2.836		3.26	2.18	2.15		2.24	3.24	3.128	2.08967	3.04	4.04	4.03	3.33	4.038	3.439	2.51	3.57	4.62174	3.18	4.77	4.24	2.94	4.02	6.42	4.96993	2.39	5.78	5.41	5.66941	5.07		7.62
104	0.057		0.747	0.381	1.02		0.55	1.61	0.971	0.798	1.71	1.52	1.67267	2.07	2.44	2.42	2.6	1.16	3.15	2.97	3.44	1.85122	3.54	2.93	2.824	2.499	2.77	2.59	3.09	1.15	3.954	1.9632	4.53	3.67	3.12391	4.22	4.37	3.55	5.28	4.6	3.42	4.51962	2.44	5.58	5.34	4.7231	6.38	2.8	8.8
105	0.007	0.545	0.684	0.896333	0.77		1.51633	1.07	1.339	1.394	1.59	1.06	1.23433	1.55	1.92	2.19	1.957	1.43	2.04	1.56	2.27	1.66707	2.2	3.12	2.99	2.51933	3.75	3.97	2.86	3.54	3.011	3.2616	2.98	1.87	2.92826	3.44	3.74	4.02	4.59	4.48	3.96	5.1125	4.11	4.87	5.98	4.41911	5.61	7.63	7.09
114	0.176	1.024	0.239667	0.455	1.07		0.737	1.56	1.56		1.82	1.5	0.718	2.03	2.16	2.37	2.122		2.62	2.72	3.32		3.34	2.63	2.95867	3.19333	3.12	3.39	3.92	4.63	3.402	3.6192	2.48	3.92	4.41087	4.31	5.76	4.01	3.52	7.85	4.64	5.54505	1.82	5.411	4.08	4.41642	6.22		6.5
115	0.018	0.567		2.68533	1		0.664	1.55	1.066	1.962	1.79	1.69		2.3	1.12		2.505		2.09	3.19	2.51		2.48	1.28	3.75167	2.697	1.74	3.71	3.79	3.54	2.917	2.681	3.31	3.95	2.39348	3.99	3.09	3.38		3.26	4.62	4.12311	1.85	6.6	3.94	3.19069	4.86		5.53
124	0.01	0.729	0.737	0.735	0.81	0.95	0.861333	1.17	1.275	1.663	1.36	1.15	0.87	1.72	1.64	3.25	2.281	3.18	0.61	3.53	2.33	1.9378	2.31	3.09	3.24733	3.277	3.4	2.66	3.26	2.88	3.415	1.942	4.13	4.49	2.66522	2.32	4.98	3.39	5.93	4.24	3.3	4.44024	3.7	6.335	5.04	3.30927	5.46	2.57	5.45
127	0.102	0.4165	0.763	0.447333	0.86	1.14	1.60467	1.42	1.325		1.34	1.29	0.856667	1.76	1.71	2.15	3.29	2.29	1.48	2.72	2.31	1.98171	2.31	2.86	1.68733	2.71533	2.39	2.19	2.63	1.44	3.338	2.781	4.42	4.28	2.7413	3.64	2.57	3.94	3.5	2.26	4.62	4.5431	4.17	4.605	5.82	4.25953	3.79	7.11	4.91
143	0.053	0.456	1.08133	1.65333	0.84		1.80533	1.37	1.2	1.332	1.77	1.53	1.86133	1.91	1.77	3.61	2.246		1.36	3.62	1.67		1.75	2.62	3.44867	1.587	2.43	4.05	4.91	2.45	3.288	3.9504	4.66	4.83	3.86957	4.56	5.96	6.33	3.18	6.33	3.44	5.37124	2.05	4.487	5.69	5.58945	4.97		6.65
144	0.073	0.4265	0.588333	0	0.81	0.2	0.137	1.2	1.45	1.04	0.47	1.37	1.30833	1.65	1.51	1.33	2.357	1.31	1.03	1.31	2.17		2.13	1.66	2.942	1.65533	1.47	2.94	2.29	3.2	1.77	2.5386	1.17		2.75652	1.74	3.31	1.3	$0.6	4.52	3.44	4.13712		3.09	2.7	4.37752	2.95		4.88
146	0.053	0.678	0.748333	1.05733	0.98		0.996333	1.56	1.829	1.719	1.27	1.51	1.772	2.05	1.6	3.09			7.97	2.54	2.18		2.26	2.11	2.83133	2.58733	2.4	4.05	2.97	3.14	3.666	4.2024	3.39	3.92	5.11739	3.92	5.13	3.61	2.18	8.65	4.46	5.04423	1.8	4.831	7.48	5.94315	5.33		6.67
Mean	0.105854	0.642735	0.666662	0.783862	0.909762	0.990909	1.27279	1.37917	1.36904	1.38514	1.42119	1.45024	1.45772	1.89917	1.93512	2.14975	2.20363	2.22303	2.38702	2.40595	2.4481	2.47541	2.51798	2.61679	2.71996	2.81755	2.97571	3.01679	3.2047	3.25805	3.20371	3.24537	3.515	3.56704	3.58491	3.71831	3.7819	3.95782	4.06654	4.27226	4.21766	4.40119	4.48827	4.63302	4.62357	4.96583	5.47429	6.29985	6.58643
Mean 2007-9	ELWLA 0-3h
7	0.121	0.841	0.804	0.456333	1.14		1.61433	1.55	1.93	1.582	1.36	1.63	1.67567	1.97	1.67	2.1	1.75		1.1	2.66	2.84		2.96	1.64	2.44467	2.23333	2.81	3.66	3.62	2.84	3.82	3.5108	2.22	2.91	4.57826	4.92	4.51	3.45	4.5	5.44	7.1	4.74423	3.4	4.548	3.75	5.64566	5.44		6.34
9	0.032	0.8725	0.835	0.454	1.06	0.46	1.143	1.7	1.686	1.535	1.7	1.76	1.704	2.46	1.83	2.3	2.351	3.64	2.61	2.22	3.93	1.87561	3.85	2.16	3.006	3.17767	2.64	2.27	2.35	1.18	2.96	4.0558	3.03	3.8	3.41957	4.73	4.78	5	5.74	4.92	4.52	4.70521	5.88	4.818	7.49	4.48623	6.75	6.26	6.2
23			1.01933	1.28133	0.95	1.13	1.465	1.53	1.56	1.828	1.37	1.53	1.59433	1.96	2.18	2.96	2.988	2.21	1.56	2.24	2.97	3.58293	3.24	3.89	3.50733	3.069	3.64	2.21	2.51	2.66	3.31	3.6556		2.44	3.31739	4.09	4.98	4.42	4.62	4.59	4.6	6.39327	7.94	3.81	6.86	4.17462	6.95	8.93	7.26
26	0.177	0.934	0.661667	3.37167	0.85		2.27233	1.36		2.004	1.97	1.58	2.04067	2.03	1.61	1.99	1.431		5.49	3.05	2.04		2.07	2.24	2.864	3.90033	2.51	4.44	2.93	2.3	2.354	2.7438	3.32	2.98	4.88478	2.66	5.31	2.79	3.88	4.98	3.3	3.30443	1.8	3.395	7.12	5.89266	4.98		7.45
43	0.009	0.428	0.559667	0.951	0.85	1.32	1.70667	1.31		1.032	1.52	1.23	1.38867	1.65	1.77	1.26	2.154	3.07	2.59	2.71	2.01	2.14634	2.05	3.08	4.07967	3.64167	2.74	3.94	2.28	1.68	2.87	3.1676	5.3	4.77	3.22609	3.53	5.4	2.63	5.39	4.88	5.42	3.96248	6.41	4.307	4.66	4.02183	5.57	8.88	6.63
52	0.068	0.7405	0.915667	0.914	0.93	2.46	1.271	1.5	1.575	1.462	1.68	1.42	1.67933	1.87	1.99	1.85	1.65	2.56	2.73	2.36	2.09	2.90732	2.09	3.01	2.42767	3.39333	3.1	2.8	3.34	2.02	3.934	3.3846	4.22	4.23	3.61739	4.52	3.44	4.03	4.16	4.08	4.7	4.68847	6.53	4.92	4.48	5.65324	6.89	6.17	7.11
53	0.05	0.444	0.419667	1.39767	0.85	1.05	1.60633	1.42	1.56		1.01	1.4	1.47733	1.94	1.83	2.82	3.13	1.95	2.05	2.82	2.53	3.15122	2.81	3.07	2.427	2.68733	2.58	3.96	3.75	3.56	2.871	3.4882	4.61	4.74	3.98696	5.21	4.04	5.4	6.38	5.58	4.74	5.3819	4.17	5.283	5.02	4.49863	6.45	3.88	9.17
54	0.193	0.861	0.738333	0.204	1.06	0.74	1.86233	1.61	1.819	1.522	1.23	1.62	1.63433	2.19	2.01	1.72	2.923	2.99	1.06	2.39	2.98		3.21	3.42	2.79933	2.89167	3.08	3.01	3.71	2.9	3.837	3.4456	3.12	4.73	3.29565	2.52	4.32	3.24	5.02	4.93	4.3	4.30286	3.35	5.501	5.12	6.3555	5.92	6.15	8.04
62	0.019	0.71	0	0.838333	1.02	1.19	0.971667	1.5	1.611	1.167	1.44	1.62	1.02167	2.07	1.8	2.08	1.796	2.44	1.62	2.64	2.4	2.64878	2.59	2.59	2.90567	3.37633	3.27	3.26	2.61	3.98	3.588	2.0826	3.05	3.18	3.55217	3.86	4.54	4.42	1.56	5.18	4.94	4.73979	10.03	5.947	4.42	5.30714	4.72	7.1	6.22
128	0.133	0.688	0.606333	0.335667	0.72	0.31	1.17	1.03	1.015	1.277	1.59	1.24	1.16533	1.54	1.88	2.95	2	2.17	3.14	2.69	1.58	3.01585	1.83	2.6	2.227	2.902	3.2	3.02	2.9	1.75	3.198	2.718	3.64	3.98	3.39348	5.18	3.16	5.16	4.17	4.14	4.18	3.55376	5.54	4.148	5.24	5.2475	6.18	8.84	7.3
Mean 10 ELWL	0.0891111	0.724333	0.655967	1.0204	0.943	1.0825	1.50827	1.451	1.5945	1.48989	1.487	1.503	1.53813	1.968	1.857	2.203	2.2173	2.62875	2.395	2.578	2.537	2.76115	2.67	2.77	2.86883	3.12727	2.957	3.257	3	2.487	3.2742	3.22526	3.61222	3.776	3.72717	4.122	4.448	4.054	4.542	4.872	4.78	4.57764	5.505	4.6677	5.416	5.1283	5.985	7.02625	7.172
Ratio !0/rest	0.841833	1.12696	0.983956	1.30176	1.03653	1.09243	1.18501	1.05208	1.16469	1.07563	1.04631	1.03638	1.05516	1.03624	0.959631	1.02477	1.0062	1.18251	1.00334	1.07151	1.03632	1.11543	1.06038	1.05855	1.05473	1.10992	0.993711	1.07963	0.936125	0.76334	1.022	0.993805	1.02766	1.05858	1.03968	1.10857	1.17613	1.0243	1.11692	1.14038	1.13333	1.04009	1.22653	1.00748	1.17139	1.03272	1.09329	1.1153	1.08891
Overall advantage	1.066
[truncated: 68 more columns]

## Sheet: ELWLA 0-3h 2007+F-W plots
			New	New			New						New												New	New
CSDH	Yield/plant_S_Spain99	GrWt/plant/NFF_1994	Yield	dYield 2012	Yield/pl_droughted_Zaj06	Grain_wt/plant_rain_Kaz00adj	dYield 2011	Yield/pl_mn_Droughted_Zaj05	Diff_ear_dwt_SUSTExp2	moddrought_Yield/plant_T14_Krakow08	Yield/plant_sev_dr_Krakow10	Yield/pl_control_Zaj06	cYield 2013	Yield/pl_mn_Rainfed_Zaj05	GrainYd/plant_(Ht_adj)_N1_97	cont_Yield/plant_T35_Krakow08	Regr_adj_Yd/plant_Zaj02	Grain_yd/plant_irrig_Kaz00	Yield/plant_M_Spain99	Yield/plant_sev_drought_Krakow07	Yield/plant_rainfed_Zaj01	Grain_wt/plant/GH/1994	Yield/plant_irrig_Zaj01	GrainYield/plant_N2_97	cYield 2011	cYield 2012	GrainYd/plant_(Ht_adj)_N3_97	Yield/plant_cont_Krakow10	Yield/plant_mod_drought_Krakow07	Grain_yd/plant_A_Kaz98	Yield/plant_rain_Zaj00	Consel 2003(50pl/row)	Vern_Total_yield/pl_Krakow06	Yield/plant_control_Krakow07	Grain_wt/plant/Mor_1994	75ppb_Mn_Grain_wt/pl_03	GrainYd/plant_(Hr_adj)_N1_98	NFA_Mn_Grain_wt/pl_03	Non-vern_Total_yield/pl_Krakow06	GrainYd/plant_(Ht_adj)_N2_98	Conselice_Yield/plant_04	Yield_g/plant_adj(2,80)_Idice03	Grain_yd/plant_B_Kaz98	Yield/plant_irrig_Zaj00	GrainYield/plant_N3_98	Idice_Mn_Yield/plant_13%_04	Total_yield/plant_75ppb_05	Grain_yd/plant_A_Kaz99	Total_yield/plant_NFA_05
Mean	0.10375	0.652566	0.665461	0.810144	0.914526	1.00081	1.29895	1.38747	1.39001	1.39573	1.42819	1.45558	1.46676	1.90537	1.92421	2.1556	2.20612	2.26689	2.414	2.42426	2.45568	2.47	2.53432	2.63168	2.7365	2.85196	2.98116	3.04234	3.18269	3.19613	3.22173	3.25	3.52191	3.59	3.61	3.76682	3.86095	3.97202	4.081	4.34189	4.42	4.437	4.57978	4.64389	4.71242	4.96578	5.53	6.37733	6.64989
3	0.036	0.4005	0.727667	0.489333	0.92		1.10467	1.41	0.954	1.351	0.49	1.53	1.601	2.17	1.59	2.55	2.873	1.46	1.38	2.1	2.78	2.15122	2.75	2.72	3.99867	3.323	2.17	3.04	4.1	3.76	2.795	3.0752	3.37	3.3	3.35217	2.76	5.35	3.33	2.49	5.99	5.58	5.99969	4.86	5.222	4.54	5.12926	5.05	5.52	6.93
10	0.015	0.9375	0.86	0.0413333	1.02	0.31	1.45133	1.51	1.709	1.349	1.64	1.63	1.694	2.35	2.72	2.52	2.839	1.6	1.69	1.46	2.93	3.62195	3.16	3.6	2.874	2.21533	4.27	1.42	3.8	5.16	4.269	4.7688	2.37	3.96	3.76087	4.6	4.84	4.14	5.73	5.23	5.72	4.46791	6.6	6.965	5.06	4.60256	6.9	5.07	7.71
11	0.135	0.5825	0.403	0.654333	0.85	0.72	1.28433	1.48	1.28	1.235	1.36	1.55	1.42767	2.04	1.77	2.76	1.469	1.13	1.99	2.81	2.86	1.7	2.81	2.74	3.124	2.71533	3.77	2.5	3.95	3.94	2.631	4.7336	2.27	4.75	3.55217	3.73	4.03	3.72	5.12	4.09	3.66	3.54706	5.07	4.685	5.34	3.77902	4.54	5.19	5.64
13	0.316	1.026	0.673333	0.989667	0.89	1.3	1.97733	1.31	1.15	1.783	2.03	1.34	1.82933	1.96	2.23	1.56	3.47	3.53	0.94	2.75	2.54	3.28415	2.51	2.81	2.4	3.29833	5.16	3.05	3.62	2.83	3.183	3.0824	4.18	5.2	4.32391	5.26	3.72	4.77	2.75	4.64	3.16	5.22546	3.91	4.822	4.41	5.88681	6.13	8.35	7.04
14	0.043	0.7785	0.932667	0.721667	0.82	0.24	1.60067	1.17	1.305	0.892	1.84	1.3	1.72167	1.68	1.47	1.48	2.296	1.67	2.64	2.32	1.88	2.37195	1.96	3.18	2.969	3.30567	2.85	2.11	2.25	3.3	2.44	3.946	1.96	2.96	2.73043	4.09	4.77	3.59	5.26	4.78	3.56	5.50026	6.42	4.052	4.22	6.08465	5.19	6.3	5.98
15	0.113	0.5495	1.02067	1.67433	1.2	0.26	1.64533	1.58	1.705	1.31	1.39	1.66	1.6	2.16	1.46	2.25	2.054	1.11	3.3	2.35	2.83	1.86098	2.86	2.41	2.63867	2.608	2.7	2.45	2.94	2.83	3.55	3.7138	3.26	3.13	4.13913	3.55	4.93	5.3		4.54	4.58	5.0598	6.24	4.972	4.63	5.05517	6.74	4.82	7.32
16	0.088	0.33			0.93	0.84		1.33	1.215	1.684	1.7	1.18		1.72	1.92	2.39	1.997	2.37	1.41	2.71	2.86	1.83293	2.83	2.38			3.12	3.97	2.18	2.63	2.243	3.335	4.56	3.22	4.11304	5.23	1.87	5.52	3.55	2.81	2.22	3.48927	6.29	3.844	3.38	3.59811	6.01	3.99	8.17
17	0.033	0.5015	0.617	0.76	0.97	0.72	1.18967	1.44	1.39	1.092	1.37	1.4	1.75467	1.91	1.96	1.18	1.838	2.37	1.87	2.17	2.56	2.69634	2.56	2.47	2.25533	2.31233	3.35	2.82	3.13	2.73	2.167	3.7696	3.64	3.89	3.72609	5.42	4.38	4.98	3.53	6.59	3.94	4.28652	6.18	3.085	7.28	5.31836	5.29	5.56	6.94
18	0.207	0.786	0.397	0.853667	1.24	2.98	1.41867	1.62	2	1.501	1.16	1.71	1.821	2.16	2.68	1.93	3.069	1.98	1.68	2.15	3.4	2.84268	3.75	4.05	3.69733	3.94467	4.33	3.37	4.13	4.49	3.648	4.4896	4.58	4.91	3.7	4.09	4.2	2.73	4.47	5.18	4.1	5.75226	3.21	5.281	5.29	4.75296	4.4	6.43	6.82
19	0.09		0.621	1.62767	0.86	1.5	1.76433	1.33	1.019	1.287	1.34	1.43	1.36733	1.84	2.15	2.21	1.989	2.35	2.95	1.86	2.02		2.29	2.9	3.24467	3.12233	2.11	3.14	3.51	3.76	3.881	3.4462	2.88	3.27		3.88	2.94	5.18	3.03	5.75	5.18	4.28518	4.6	5.48	3.38	5.36436	5.98	5.62	7.38
20	0.124	0.6275	0.980667	1.48067	1.01	0.47	1.31267	1.58	1.077	1.155	1.93	1.56	1.81767	2.11	2.62	2.28	2.569	2.2	3.09	3.59	2.91	3.25	2.97	3.53	2.53233	2.31833	3.77	3.48	3.26	2.24	3.8	4.6176	4.97		3.98913	4.47	3.83	5.03		5.49	3.86	5.44696	2.62	4.676	6.52	5.9214	5.46	6.11	7.68
21	0	0.8675	0.822667	0.811	0.85	1.6	0.541667	1.4	1.83	1.653	1.53	1.53	1.46433	1.98	2.35	2.02	2.014	2.49	1.13	2.47	2.74	3.34146	2.8	3.01	2.053	2.99833	3.21	2.92	3.02	1.91	2.704	3.3638	5.48	2.49	4.38478	4.63	3.02	4.38	7.15	3.73	2.92	4.04284	5.46	4.223	3.85	5.21892	5.66	7.39	6.21
22	0.097	0.7875	1.04567	0.532667	1.17	1.29	1.37567	1.55	1.565		1.51	1.82	1.647	2.01	2.63	1.74	2.042	2.1	3.01	2.16	2.99	2.61829	2.93	3.07	3.88267	3.606	4.44	3.12	2.55	3.94	2.964	3.2696	3.04	4.09	3.80435	5.39	6.57	4.41	4.36	6.23	6.16	4.69	4.2	4.596	5.71	6.66022	6.02	7.11	7.01
24	0.211	0.482	1.35667	0.843	1.1	1.11	1.81167	1.59	1.529	1.837	1.57	1.72	2.081	2.25	1.7	1.78	2.652	3.33	2.63	3.35	3.4	2.52317	3.4	2.95	3.68367	4.16067	3.68	3.16	4.47	4.28	3.458	4.7666	2.89	5.29	4.55	3.65	5.26	2.73	5.46	4.31	4.46	4.63479	5.04	5.401	6.47	4.85885	6.86	10.76	6.78
25	0.061	0.786	1.041	1.54933	0.9		1.15267	1.44	1.08	1.687	1.27	1.47	1.86	1.93	1.59	2.23	3.231		2.03	2.12	1.57		1.93	1.91	3.77533	3.764	1.75	3.69	2.95	1.15	3.065		2.91	3.64	1.31304	2.98	2.6	3.31	2.06	3.99	4.62	4.90278	1.15	4.869	4.65	4.45915	5.87		6.06
26	0.177	0.934	0.661667	3.37167	0.85		2.27233	1.36		2.004	1.97	1.58	2.04067	2.03	1.61	1.99	1.431		5.49	3.05	2.04		2.07	2.24	2.864	3.90033	2.51	4.44	2.93	2.3	2.354	2.7438	3.32	2.98	4.88478	2.66	5.31	2.79	3.88	4.98	3.3	3.30443	1.8	3.395	7.12	5.89266	4.98		7.45
27	0.042		0.716	0.515667	1.03	0.52	1.126	1.39	0.989	1.387	1.57	1.26	1.06867	1.77	1.51	1.49	2.318	2.92	3.21	2.23	2.4	2.37927	2.54	2.03	2.42533	3.40533	2.45	2.62	3.61	2.92	2.621	2.8182	3.82	3.59	3.64565	4.03	3.99	3.89	3.42	3.53	3.62	3.48089	4.31	3.154	4.55	4.04054	5.62	7.38	6.27
28	0.24	0.688	0.786	1.24367	0.91	0.92	0.207667	1.43	1.211	0.616	1	1.42	1.765	1.82	1.63	1.34	2.005		5.51	2.29	2.55	1.87805	2.55	3.37	3.03133	1.53333	1.36	2.43	2.17	3.78	3.271	3.0662	2.73		5.84565	2.66	4.27	3.29	3.83	6.09	4.98	5.12523	4	5.305	6.11	6.10168	4.43	3.69	4.72
29	0.017	0.69	0.325	0.830333	0.97		1.10933	1.4	0.915	1.483	1.85	1.34	1.133	1.73	1.7	1.39	2.515		2.37	2.6	2.61		2.59	2.58	2.24	2.39033	3.96	2.13	3.48	3.94	3.256	3.369	3.29	4.17	3.73261	1.82	4.27	2.78		5.21	3.7	3.78851	3.68	4.751	6.48	3.74962	5.72		5.6
30	0.225	0.6095	0	0.508333	0.89	1.62	1.20033	1.41	1.809	1.377	1.6	1.31	1.05267	1.72	2.1	1.88	1.359	1.68	4.27	1.92	2.79	2.66341	2.74	2.52	1.794	2.60967	3	2.24	3.34	2.02	3.196	2.6772	2.79	3.08	2.92174		2.91		5.53	3.03	2.72	5.0432	5	3.563	6.17		5.33	6.33	7.79
31	0.034	0.592	0.358333	0.445	1.3		1.467	1.77	1.821	1.37	1.61	1.87	1.51733	2.42	1.83	2.11	2.475		1.95	2.78	3.27	2.46341	3.41	3.1	3.55433	2.58567	3.32	3.69	4.32	2.6	4.393	2.5646	4.53	4.7	2.94783	2.38	4.56	3.46	2.84	4.39	3.92	4.6969	2.32	5.68	5.22	5.03851	6.38		7.73
32	0.141	0.878	0.549667	0.728333	0.95	0.59	1.703	1.59	1.585	1.513	1.15	1.55	1.66667	2.09	1.97	1.97	5	1.86	3.12	2.93	2.4	1.84634	2.61	2.37	3.22033	2.66733	2.77	3.58	3.83	5.31	3.829	3.5294	4.92	2.94	4.5587	4.66	3.98	4.48	4.16	4.53	2.58	5.15443	4.82	4.963	4.27	5.16812	6.59	5.1	7.3
33	0.187	0.8945	0	0.333333	0.98	1.83	2.06167	1.61	1.445	1.493	1.91	1.67	1.502	2.36	2.55	2.55	1.976	4.04	3.31	2.86	2.46	2.77439	2.54	2.8	2.52367	3.07233	3.22	2.84	3.97	5.72	3.708	3.2324	1.89	4.16	4.15217	3.99	4.38	3.86	4.39	4.14	3.24	3.48416	5.57	4.323	3.97	5.42744	5.38	10.44	6.72
34	0.158	0.6125	0.559333	0.479667	0.84	0.67	0.642333	1.26	1.299	1.581	1.03	1.31	1.201	1.61	1.59	1.91	1.018	2.32	2.5	1.93	2.88	2.02195	2.89	1.9	2.69933	2.41033	2.58	2.67	2.38	1.84	2.355	2.7458	3.54	2.12	1.73913	2.28	2.72	2.94	5.31	3.57	3.24	3.75713	2.93	4.607	2.93	3.33536	4.97	4.13	4.7
35	0.028	0.5425	0	0.674	0.86	1.24	0.922	1.29		1.397	1.43	1.39	0.87	1.73	2.26	1.75	1.784	1.55	0.56	2.21	1.73	2.73902	1.93	1.85	2.078	2.055	2.31	3.52	2.77	3.1	2.469	3.3914	3.15	2.96	2.27391		3.06		4.52	3.37	4.84	4.89862	2.55	2.727	3.06	4.85257	4.99	5.68	5.46
36	0	0.587	0.297333	0.201	0.96	0.1	0.424667	1.34	1.345		1.26	1.51	0.871	1.72	2.04	1.9	1.792		1.11	2	3.01	1.20976	2.97	2.91	2.88633	2.598	2.98	2.52	2.58	3.48	2.374	3.428	3.39	2.79	3.80652	2.05	5.57	2.33	2.45	4.55	3.48	3.48354	4.94	3.803	4.46	3.83419	4.43	6.75	6.33
37	0.136	0.696	0.701333	0.566667	0.88	1.44	0.505	1.3	1.45	1.346	1.31	1.37	0.854667	1.71	1.84	1.76	1.508	1.94	0.93	2.09	2.66	1.4622	2.57	2.5	2.51467	2.81167	3.59	2.33	2.19	5.22	2.61	3.3076	3.36	2.5	2.64565	3.28	3.56	4.55	4.43	3.83	3.86	4.72012	10.84	4.409	4.34	4.59078	5.79	5.45	5.71
38	0.061	0.566	0.152667	0.399333	0.72	0.93	0.959667	1.06	1.33	1.4	1.36	1.24	1.25633	1.52	1.17	0.88	2.201	2.05	1.73	1.39	1.55	1.54634	1.49	1.66	1.992	2.447	2.13	2.6	1.58	4.88	1.843	3.0526	2.01	1.62	2.85435	1.59	2.51	1.08	2.94	1.86	4.68	3.2946	4.3	3.728	2.15	2.61553	1.74	4.49	3.96
39	0.093	0.693	1.36333	0.649333	0.84	0.86	1.37133	1.39	1.375	1.702	1.62	1.5	1.59567	1.84	2.31	1.47	1.412	2.41	2.91	2.76	2.18	3.05488	2.32	4.09	2.35867	2.867	2.87	3.32	3.27	3.09	3.88	2.7348	4.75	2.68	3.30652	5.62	3.73	4.69	3.71	4.03	4.42	3.95446	4.74	4.025	3.24	6.20766	6.04	6.22	7.87
40	0.143	0.47	0.662	0.478667	0.72	0.3	1.412	1.02	1.09	1.19	1.75	1.14	1.18567	1.41	1.89	1.34	1.51	1.01	1.82	2.16	1.59	2.67317	1.53	2.46	2.23	2.02567	3.4	2.41	3.27	2.46	1.8	2.7388	2.76	2.5	4.07826	2.44	2.39	2.52	2.68	2.58	2.92	3.95261	3.58	3.513	2.82	3.6314	3.55	3.54	5.26
41	0.069	0.325	0.602	0.0983333	0.86	0.12	1.39033	1.43	1.215	1.177	1.2	1.37	1.457	1.89	1.35	1.15	1.764	3.17	3.8	1.25	2.73		3.05	1.17	2.824	1.63033	1.6	2.68	2.47	4.24	2.73	2.5958	1.26	1.75	2.83043	0.99	5.2	1.33	0.56	7.02	4.06	2.5103	3.08	4.468	5.64	3.67989	4.96	3.86	3.6
42	0.008	0.335	0.847667	0	0.81		1.26567	1.17	0.901	1.349	0.85	1.27	1.73133	1.63	0.91		2.2		0.66	1.45	1.85		1.94	1.4	2.01833	2.25533	1.87	2.57		4.96	1.811	2.1464	3.01	3.51	3.39783	2.49	3.85	1.66	0.23	4.35	3.4	1.98437	1.15	3.418	3.04	3.16852	2.4		3.42
43	0.009	0.428	0.559667	0.951	0.85	1.32	1.70667	1.31		1.032	1.52	1.23	1.38867	1.65	1.77	1.26	2.154	3.07	2.59	2.71	2.01	2.14634	2.05	3.08	4.07967	3.64167	2.74	3.94	2.28	1.68	2.87	3.1676	5.3	4.77	3.22609	3.53	5.4	2.63	5.39	4.88	5.42	3.96248	6.41	4.307	4.66	4.02183	5.57	8.88	6.63
44	0.018	0.419			0.92	1.28		1.38	1.319	1.891	1.35	1.29		1.7	2.21	0.75	1.849	2.48	1.2	3.22	2.92	2.36585	3	2.72			3.57	3.59	3.89	4.24	3.074	3.6634	3.18	4.85	2.64783	3.87	5.26	3.3	7.13	4.1	5.4	5.56551	5.66	4.564	4.13	6.21697	4.15	5.47	5.62
45	0.1	0.7105	0.593	1.04967	0.82		1.65567	1.26	1.6	1.368	0.93	1.51	1.52833	1.8	1.77		1.139		2.79	2.19	1.76		1.92	2.44	2.57833	2.931	2.89	2.26	2.89	4.96	3.541	3.8778	5.2	3.48	4.55435	2.52	2.82	4.32	2.78	4.24	2.32	3.18281	3.92	4.636	3.16	5.49529	5.45		7.03
46	0.113	0.9125	0.806667	0.747667	0.89	0.53	1.64967	1.42	1.68	1.325	1.19	1.36	1.46667	1.8	2.62	2.45	1.567	2.51	2.13	3.13	1.69	3.45976	1.74	3.28	2.393	3.49967	3.56	2.93	3.88	1.68	3.526	2.6952	4.62	3.61	3.6587	6.05	3.26	5.42	4.8	4.07	5.12	3.94689	8.07	4.547	4.52	5.60503	6.76	8.15	8.59
47	0.319	0.7645	0.728333	0.522333	0.81	1.12	1.185	1.28	1.606	0.835	1.22	1.26	1.41167	1.71	1.54	1.52	2.166	1.73	3.01	1.37	2.32		2.4	2.19	2.44833	2.52067	2.38	2.99	1.98	4.96	2.511	4.5988	1.59	1.93	2.73913	1.41	4.46	1.43	2.87	5.64		4.81501	2.49	3.371	4.92	3.9696	3.24	4.26	4.6
48	0.012	0.45	0.972333	0.592	0.85	0.63	1.392	1.46	1.709	1.203	1.3	1.63	1.49433	2.21	2.15	2.57	3.376	1.51	1.34	2.69	2.41	3.27439	2.66	2.99	3.42133	2.77267	3.18	3.55	4.27		3.979	3.4534	4.43	4.14	4.13478	5.07	5.32	3.23	6.08	5.19	5.02	5.83075	4.28	5.791	5.84	5.26098	6.86	8.82	7.33
49	0.064	0.4	1.122	0.380333	0.8	0.94	1.21567	1.15	1.049	0.622	1.08	1.42	1.64933	1.6	1.17	1.68	2.42	4.26	1.86	0.75	1.69	1.93415	1.64	1.69	2.63833	1.51867	1.93	2.7	1.65	5.22	1.969	3.2958	1.51	1.38	1.70652	1.76	4.02	2.39	1.98	3.13	3.6	3.00819	6.78	3.44	5.45	2.56613	3.02	7.27	4.46
50	0.062	0.4545	0.941667	0.409333	0.94	0.47	0.755	1.48	1.09	0.928	1.18	1.48	1.123	1.9	1.36	2.5	2.156	2.3	1.95	2.45	2.7	2.7	2.87	1.61	1.93	2.438	2.23	2.44	3.28	3.48	2.419	3.1034	3.57	3.23	4.41304	1.72	4.63	3.7	3.51	5.95	3.7	4.11155	6.49	3.292	4.74	4.82998	9.57	7.22	5.79
51	0.044	0.6965	1.34933	0.411	0.88	0.31	1.932	1.47	1.519	1.325	1.19	1.58	1.703	2.1	2.52	2.22	2.027	3.32	1.43	2.58	2.18	3.41585	2.24	3.19	2.47633	2.94933	3.53	3.95	3.54	3.1	2.656	2.7754	4.34	4.51	5.31522	3.87	3.61	5.12	4.62	4.09	4.96	3.79341	5.17	3.336	5.28	5.25232	5.89	7.78	9
52	0.068	0.7405	0.915667	0.914	0.93	2.46	1.271	1.5	1.575	1.462	1.68	1.42	1.67933	1.87	1.99	1.85	1.65	2.56	2.73	2.36	2.09	2.90732	2.09	3.01	2.42767	3.39333	3.1	2.8	3.34	2.02	3.934	3.3846	4.22	4.23	3.61739	4.52	3.44	4.03	4.16	4.08	4.7	4.68847	6.53	4.92	4.48	5.65324	6.89	6.17	7.11
53	0.05	0.444	0.419667	1.39767	0.85	1.05	1.60633	1.42	1.56		1.01	1.4	1.47733	1.94	1.83	2.82	3.13	1.95	2.05	2.82	2.53	3.15122	2.81	3.07	2.427	2.68733	2.58	3.96	3.75	3.56	2.871	3.4882	4.61	4.74	3.98696	5.21	4.04	5.4	6.38	5.58	4.74	5.3819	4.17	5.283	5.02	4.49863	6.45	3.88	9.17
54	0.193	0.861	0.738333	0.204	1.06	0.74	1.86233	1.61	1.819	1.522	1.23	1.62	1.63433	2.19	2.01	1.72	2.923	2.99	1.06	2.39	2.98		3.21	3.42	2.79933	2.89167	3.08	3.01	3.71	2.9	3.837	3.4456	3.12	4.73	3.29565	2.52	4.32	3.24	5.02	4.93	4.3	4.30286	3.35	5.501	5.12	6.3555	5.92	6.15	8.04
55	0.063	0.6665	0.61	0.486667	0.75		1.50567	1.27	1.525	1.385	1.26	1.44	0.968	1.83	1.99	1.25	1.608		2.95	1.98	2.16		2.15	2.83	3.111	2.44333	2.94	1.96	3.59	3.11	2.873	2.9238	2.88	3.37	3.31739	3.02	3.42	3.93	1.58	4.66	3.64	2.91278	2.65	4.553	4.3	5.58329	3.99		6.07
56	0.134	0.926	0.718333	0.697667	0.77	1.12	1.019	1.32	1.35	0.846	1.28	1.55	1.613	1.94	2.99	2.24	1.282	2.01	2.84	3.31	2.22	3.44024	2.31	2.87	2.43467	3.489	4.49	3.29	3.86	3.86	3.536	3.0094	3.35	4.38	5.11304	4.66	4.2	5.06	4.41	5.44	4.1	5.63866	7.2	5.311	4.69	6.49488	7	9.52	7.9
57	0.152	0.3965	1.523	0.974	0.9	1.34	1.33633	1.39	1.014	1.074	1.87	1.45	1.65433	1.94	2.04	1.45	2.371	1.86	0.94	1.95	2.84	2.71341	3.03	2.24	2.28167	2.81333	1.91	2.84	3.89	2.97	3.129	3.7096	2.56	4.66	4.27391	4.65	3.51	4.69	4.61	3.3	4.32	4.48291	8.36	5.261	4.56	5.98191	7.17	5.97	7.95
58	0.253	0.809	0.655333	1.345	0.97	1.52	2.061	1.53	1.42	1.837	1.64	1.67	1.55733	2.22	2.16	2.89	2.756	3.47	3.99	2.97	2.73	2.40732	2.83	3.3	2.397	2.41967	3.51	3.71	3.82	2.95	4.338	3.6502	4.92	4.08	4.12609	4.66	4.61	5.69	3.72	4.11	6.58	4.29138	7.31	5.605	4.91	6.66661	7.34	9.9	8.81
59	0	0.3365	0.860333	0.756	0.64	0.48	0.599	0.93		1.472	1.21	0.95	1.46733	1.17	1.47	1.94	1.398	1.65	3.22	2.78	1.14		1.36	1.79	1.78933	2.55067	2.52	2.5	2.53	3.83	3.346	2.7812	1.9	2.89	2.82826		2.37		3.75	2.18	5.72	3.23484	3.83	4.975	2.64	5.50334	4.72	6.96	4.87
60	0.062	0.3985	0.717667	0.716333	0.94	2.13	1.71933	1.45	0.905	1.537	1.68	1.48	1.60567	2.04	2.63	2.28	1.998	1.75	3.83	2.6	2.48	2.70366	2.5	2.22	2.097	2.134	3.63	2.85	3.12	3.6	3.664	2.8068	5.28	2.72	5.06087		2.77		4.41	2.99	4.14	3.65329	6.04	4.628	2.54	5.12152	5.61	4.01	6.07
61	0.135	0.709	0.333667	1.02833	0.72	1.26	1.04	1.26	0.99	0.935	1.62	1.4	1.026	1.81	1.79	1.66	1.287	2.48	2.38	1.84	2.99	2.45976	2.99	3.24	1.54333	3.15767	3.01	2.81	2.51	3.29		2.1888	6.07	2.69	3.65652	4.04	3.12	3.39	3.78	3.8	5.02	5.20903	4.7		5.23	4.75809	6.06	6.1	6.28
63		0.68	0.569667	1.29767	0.83	0.22	0.796333	1.35		1.345	1.56	1.45	2.07533	2.08	1.77	2.88	3.75	1.87	1.31	1.91	2.41	2.98659	2.75	2.7	2.559	2.74233	3.37	2.58	4.01	2.38	1.853	3.506	2.93	4.21	2.63478	4.22	3.3	4.09	4.48	3.64	4.36	4.65117	2.62	3.532	3.85	5.72352	5.97	5.08	6.96
64	0.115	0.7015	0.921333	1.07867	0.95	1.34	1.30733	1.37	0.985	1.658	1.61	1.33	1.51667	1.95	2.17	3.06	1.851	2.13	1.7	2.6	2.71	2.59756	2.73	2.86	3.31733	3.08867	3.25	2.71	2.4	2.09	3.508	3.7104	2.94	2.29	4.33478	4.52	4.28	3.72	4.24	4.15	4.78	4.49007	5.28	5.609	4.95	5.932	4.17	6.74	6.15
65	0.083	1.0225	0.817333	1.838	1.06	1.77	0.793667	1.58	1.475	1.379	1.98	1.41	1.50133	1.98	1.76	2.97	3.418	1.77	2.12	1.62	2.08	$0	2.18	2.91	1.92767	2.77267	3.73	3.32	3.74	4.05	4.003	2.9952	4.75	3.83	4.13261	4	3.54	5.61	4.51	4.89	3.86	4.39131	3.71	4.4	4.97	4.53938	6.21		7.25
66	0.077	0.6465	0.324333	0.66	0.91	2.23	1.76567	1.39		1.275	1.6	1.25	1.53067	1.96	2.39	2.7	2.766	2.41	1.74	2.03	3.17	2.51951	3.14	3.3	3.68667	4.413	3.3	3.68	3.31	4.68	4.064	2.2626	2.3	3.74	4.46087		3.82	5.55	3.24	5.22	4.7	3.47578	6.26	5	5.94	6.59862	6.48	6.32	8.99
67	0.348	0.775	0.506667	0.648	0.71	0.99	1.72967	1.24	1.075	1.405	1.07	1.36	1.529	1.66	2.11	2.76	1.448	2.17	3.43	2.81	2.37	2.81463	2.4	2.17	2.719	2.68	2.43	3.35	3.15	2.48	3.518	3.1558	4.38	3.18	3.36304	4.6	3.13	5.21	3.75	3.69	4.02	3.85249	2.95	4.442	4.6	4.15485	5.97	4.69	7.36
69	0.054	0.743	0.723333	1.96967	0.99		1.84367	1.54	1.219	1.321	0.96	1.44	1.59233	2.03	2	1.64	3.569		1.58	2.86	2.66	0	2.62	3.29	3.54	3.10167	2.46	2.6	2.72	3.34	3.028	3.4966	2.82	3.85	4.0587	3.7	3.9	4.9	3.08	5.43	4.08	5.66044	1.6	3.811	5.7	5.11739	3.21		7
70	0.221	0.5635	0.662667	0.933	0.83	0.68	1.28667	1.29	1.095	2.058	2.06	1.12	1.34933	1.64	2.16	2.12	2.228	2.47	1.85	2.57	1.79	2.38902	2.03	3.18	1.892	2.70367	3.15	3.25	2.45	2.41	3.74	3.629	3.45	3.02	2.51522	4.65	1.89	5.27	3.69	2.3	3.3	3.62998	5.98	4.877	3.52	4.17901	3.9	4.79	6.24
71	0.102	0.9655	0.681667	1.70733	0.81	0.34	1.69767	1.31	1.58	1.997	1.22	1.5	1.985	1.85	2.06	2.94	1.857	2.05	2.96	1.93	2.19	2.66098	2.27	2.19	2.54033	3.284	4	4.11	4.27	2.87	3.537	2.8766	5.17	4.81	5.94783	4.84	2.82	4.33		4.39	3.54	5.08724	5.8	4.357	4.02	5.66927	5.67	9.25	7.05
72	0.095	0.452	0.414667	0.792333	0.74	1.22	1.09733	1.12	1.386	1.727	1.37	1.03	1.27867	1.43	1.69	2.38	1.82	1.43	1.79	1.79	2.1	1.9	2.08	1.98	2.105	2.768	2.35	3.16	1.98	1.48	2.53	3.7254	4.67	2.43	3.41522	4.34	2.33	4.35	5.88	2.24	4.34	3.96407	3.8	3.889	2.23	3.08222	4.24	6.17	6.23
80	0.143	0.5805	0.473667	0.45	0.89		1.02567	1.34	1.446	1.063	1.5	1.47	1.232	1.84	1.63	2.27	2.28		0.92	2.45	2.32	1.89024	2.26	2.95	2.92167	2.74567	2.29	3.45	2.05		3.129	2.308	2.79	3.18	3.12174	2.98	4.4	2.99	3.23	4.03	3.26			5.483	4.46	2.97533	4.21		5.56
86	0.11	0.5515	0.272667	0.771667	1.23	1.5	1.04133	1.54	1.46	1.431	0.86	1.66	1.44933	2.03	1.76	2.59	1.723	2.14	2.23	2.37	2.85	2.26951	2.81	2.93	2.76333	3.20733	3.21	2.38	2.07	2.5	2.36	2.5196	2.4	3.87	2.76304	3.41	3.04	4.19	3.95	3.3	4.54	4.46722	2.93	3.706	3.4	5.16634	4.43	5.93	6.16
87	0.075	0.659	0.927333	0.82	1.06	0.52	1.245	1.55	1.7	1.588	1.5	1.77	0.948	2.28	1.76	2.18	2.887	1.61	2.6	2.82	3.06	1.91707	2.8	3.29	3.62167	3.01867	3.06	3.16	2.98	1.27	4.53	3.7874	1.74	3.28	4.75652	3.13	3.45	3.95	7.31	3.5	4	4.37787	5.67	5.368	4.16	4.82717	5.23	6.23	7.1
88	0.055	0.368	0.645333	0.776	1	2.42	0.524667	1.49	1.59	1.29	1.39	1.49	1.37867	1.99	2.29	2.14	2.105	2.08	1.42	2.59	2.87	3.32073	2.88	2.94	2.43867	2.36667	2.51	3.38	3.12	1.26	3.238	2.5024	3.8	3.52	3.41522	3.63	3.27	5.41	6.41	3.88	4.78	4.84951	3.71	4.849	4.76	6.72609	6.74	7.14	6.64
90	0.284	1	0.969	0.107667	1.02	0.73	1.80433	1.6	2.42	1.104	1.33	1.76	1.95133	2.29	2.59	2.48	2.99	4.29	2.56	2.46	2.82	3.45366	2.89	3.23	2.80267	3.63567	4.32	3.81	4.19	1.71	5.356	3.9534	2.51	3.6	4.3087	3.87	4.56	4.8	4.91	4.66	4.48	5.74298	5.93	5.733	5	6.02485	7.95	8.47	11.03
91	0.072	0.612	0.822667	0.123667	1.03	0.25	1.18167	1.62	1.7	1.189	1.65	1.57	1.58367	2.17	2.2	1.67	2.639	3.89	1.69	2.07	3.72	1.51829	3.99	2.64	2.79033	2.77133	3.45	3.46	3.11	3.19	4.685	4.1784	5.84	4.17	2.11739		4.62		6.93	4.5	3.84	5.10172	4.31	5.134	4.57	3.9102	7.49	6.06	7.9
92	0.03	0.4645	0.325	0.217667	0.88	1.76	0.803333	1.35	1.399	1.584	1.67	1.23	0.857667	1.72	1.83	1.27	1.418	1.95	2.11	2.92	2.46	1.83415	2.4	2.38	2.10333	2.483	3.48	1.99	2.82	2.55	3.082	3.1038	3.84	3.34	2.1413	3.31	3.93	2.84	4.69	3.22	4.46	3.66045	1.56	5.156	5.2	4.88765	6.05	6.63	5.98
93	0.071	0.4825	0.634667	0.529333	1.16	0.65	1.402	1.62	1.26	1.377	1.49	1.76	1.21567	2.36	2.4	2.08	3.015	2.35	2	2.31	2.93	3.73415	2.85	2.87	2.15867	3.59233	3.71	2.22	3.53	3.33	4.643	3.5184	4.22	3.54	4.0087	3.9	2.99	4.71	4.9	3.31	3.84	4.03763	4.52	5.608	4.91	4.67829	5.94	9.02	6.72
94	0.033	0.6235	0.106667	0.0823333	0.76	0.45	0.386667	1.28	1.109	0.995	0.66	1.34	0.899667	1.78	1.69	1.71	0.731	1.02	3.42	1.76	2.17	2.58293	2.28	2.17	2.14333	2.64467	1.64	2.81	2.61	1.59	3.359	2.4722	3.55	3.53	3.48696	2.52	3.21	3.5	4.79	3.1	4.92	3.14145	5.27	4.409	5.09	5.72642	3.07	7.01	5.01
96	0.12	0.794			0.82	3.14		1.2		1.492	1.74	1.41		1.88	2.18	2.89	2.055	3.18	4.58	2.46	1.91	2.58537	2.01	2.65			4.23	2.45	2	2.14		2.9606	4.06	3.79	4.23478		4.03		5.93	3.58	4.68	4.85012	3.47	4.657	4.02	4.60331	5.67	8.13	6.96
97	0.021	0.7675	0.482333	0.369333	0.69	1.28	1.60967	1	1.365	1.413	1.13	1.38	1.30033	1.65	2.12	2.67	1.207	1.99	1.87	2.65	1.93	2.9	2	2.6	2.41767	3.24533	2.3	3.74	3.12	3.19	2.444	2.8756	3.36	3.99	1.49565	4.77	3.65	5.34	4.92	3.44	2.82	3.55923	8.2	3.797	3.85	6.2858	6.59	2.9	6.67
98	0.411	1.0495	0.609333	2.35733	0.79		1.95433	1.18		1.456	1.47	1.48	2.134	1.9	1.3	2.91	2.014		3.22	2.99	1.86		1.98	1.5	2.89967	2.93367	2.3	4.24	3.85	2.55	3.086	2.5708	3.31	4.6	3.6413	3.24	2.88	3.57	1.21	4.2	2.9	5.09316	$0.55	4.577	4.97	5.49017	6.95		6.5
99	0.013	0.516	0.493	0.440333	0.8	0.49	1.18633	1.18	1.535	1.232	1.42	1.41	1.36833	1.75	1.69	2.71	1.526	0.81	1.8	2.37	2.24	3.36585	2.26	2.25	3.366	2.51233	2.23	3.39	3.5	3.33	3.052		4.78	3.96	3.33913	4.41	2.46	4.16	5.44	3.65	3.08	4.00669	4.46	5.085	3.13	4.52443	6.69	4.58	7.5
102	0.1	0.9335	0.259667	0.834667	0.95		1.34567	1.46	1.521	1.244	1.24	1.67	1.527	2.23	2.16	3.15	2.836		3.26	2.18	2.15		2.24	3.24	3.128	2.08967	3.04	4.04	4.03	3.33	4.038	3.439	2.51	3.57	4.62174	3.18	4.77	4.24	2.94	4.02	6.42	4.96993	2.39	5.78	5.41	5.66941	5.07		7.62
104	0.057		0.747	0.381	1.02		0.55	1.61	0.971	0.798	1.71	1.52	1.67267	2.07	2.44	2.42	2.6	1.16	3.15	2.97	3.44	1.85122	3.54	2.93	2.824	2.499	2.77	2.59	3.09	1.15	3.954	1.9632	4.53	3.67	3.12391	4.22	4.37	3.55	5.28	4.6	3.42	4.51962	2.44	5.58	5.34	4.7231	6.38	2.8	8.8
105	0.007	0.545	0.684	0.896333	0.77		1.51633	1.07	1.339	1.394	1.59	1.06	1.23433	1.55	1.92	2.19	1.957	1.43	2.04	1.56	2.27	1.66707	2.2	3.12	2.99	2.51933	3.75	3.97	2.86	3.54	3.011	3.2616	2.98	1.87	2.92826	3.44	3.74	4.02	4.59	4.48	3.96	5.1125	4.11	4.87	5.98	4.41911	5.61	7.63	7.09
114	0.176	1.024	0.239667	0.455	1.07		0.737	1.56	1.56		1.82	1.5	0.718	2.03	2.16	2.37	2.122		2.62	2.72	3.32		3.34	2.63	2.95867	3.19333	3.12	3.39	3.92	4.63	3.402	3.6192	2.48	3.92	4.41087	4.31	5.76	4.01	3.52	7.85	4.64	5.54505	1.82	5.411	4.08	4.41642	6.22		6.5
115	0.018	0.567		2.68533	1		0.664	1.55	1.066	1.962	1.79	1.69		2.3	1.12		2.505		2.09	3.19	2.51		2.48	1.28	3.75167	2.697	1.74	3.71	3.79	3.54	2.917	2.681	3.31	3.95	2.39348	3.99	3.09	3.38		3.26	4.62	4.12311	1.85	6.6	3.94	3.19069	4.86		5.53
124	0.01	0.729	0.737	0.735	0.81	0.95	0.861333	1.17	1.275	1.663	1.36	1.15	0.87	1.72	1.64	3.25	2.281	3.18	0.61	3.53	2.33	1.9378	2.31	3.09	3.24733	3.277	3.4	2.66	3.26	2.88	3.415	1.942	4.13	4.49	2.66522	2.32	4.98	3.39	5.93	4.24	3.3	4.44024	3.7	6.335	5.04	3.30927	5.46	2.57	5.45
127	0.102	0.4165	0.763	0.447333	0.86	1.14	1.60467	1.42	1.325		1.34	1.29	0.856667	1.76	1.71	2.15	3.29	2.29	1.48	2.72	2.31	1.98171	2.31	2.86	1.68733	2.71533	2.39	2.19	2.63	1.44	3.338	2.781	4.42	4.28	2.7413	3.64	2.57	3.94	3.5	2.26	4.62	4.5431	4.17	4.605	5.82	4.25953	3.79	7.11	4.91
128	0.133	0.688	0.606333	0.335667	0.72	0.31	1.17	1.03	1.015	1.277	1.59	1.24	1.16533	1.54	1.88	2.95	2	2.17	3.14	2.69	1.58	3.01585	1.83	2.6	2.227	2.902	3.2	3.02	2.9	1.75	3.198	2.718	3.64	3.98	3.39348	5.18	3.16	5.16	4.17	4.14	4.18	3.55376	5.54	4.148	5.24	5.2475	6.18	8.84	7.3
143	0.053	0.456	1.08133	1.65333	0.84		1.80533	1.37	1.2	1.332	1.77	1.53	1.86133	1.91	1.77	3.61	2.246		1.36	3.62	1.67		1.75	2.62	3.44867	1.587	2.43	4.05	4.91	2.45	3.288	3.9504	4.66	4.83	3.86957	4.56	5.96	6.33	3.18	6.33	3.44	5.37124	2.05	4.487	5.69	5.58945	4.97		6.65
144	0.073	0.4265	0.588333	0	0.81	0.2	0.137	1.2	1.45	1.04	0.47	1.37	1.30833	1.65	1.51	1.33	2.357	1.31	1.03	1.31	2.17		2.13	1.66	2.942	1.65533	1.47	2.94	2.29	3.2	1.77	2.5386	1.17		2.75652	1.74	3.31	1.3	$0.6	4.52	3.44	4.13712		3.09	2.7	4.37752	2.95		4.88
146	0.053	0.678	0.748333	1.05733	0.98		0.996333	1.56	1.829	1.719	1.27	1.51	1.772	2.05	1.6	3.09			7.97	2.54	2.18		2.26	2.11	2.83133	2.58733	2.4	4.05	2.97	3.14	3.666	4.2024	3.39	3.92	5.11739	3.92	5.13	3.61	2.18	8.65	4.46	5.04423	1.8	4.831	7.48	5.94315	5.33		6.67
Mean	0.102337	0.648889	0.668554	0.809704	0.906905	1.02667	1.27226	1.38083	1.37721	1.37478	1.4194	1.4431	1.45707	1.90143	1.93536	2.12765	2.20986	2.23418	2.36821	2.40155	2.44476	2.48585	2.5125	2.65452	2.72107	2.81039	2.97452	3.05667	3.17386	3.1422	3.1965	3.24077	3.5281	3.58951	3.59576	3.69208	3.87488	3.93795	4.14872	4.35048	4.21766	4.37864	4.47864	4.63304	4.64893	4.93767	5.48464	6.29672	6.65762
Mean 2007	ELWLA 0-3h
1	0.23	0.4505	0.521333	0.617	0.8	1.21	1.835	1.14	0.87	1.568	1.38	1.48	1.28067	1.63	2.15	2.74	1.796	3.05	4.03	3.51	1.96	1.96951	2.13	2.37	2.53367	3.38633	2.69	2.63	2.1	3.03	2.875	3.58	3.3	3.32	2.88696	3.73	1.93	3.71	4.16	3.81	3.7	4.3129	2.18	3.231	4.68	4.58993	3.81	8.23	5.83
2	0.272	0.7545	0.591	1.577	0.87	0.28	1.96833	1.38	1.091	1.552	2.38	1.58	1.97033	1.93	1.64	2.04	1.43	2.6	4.97	2.62	2.19	2.51829	2.39	2.47	1.62667	2.83067	2.92	3.29	2.68	4.48	3.482	3.0118	2.82	3.84	3.5413	3.33	2.85	2.62	3.9	4.02	4.86		2.92	4.965	4.8	4.87399	6.39	9.2	7.22
4	0.107	0.636	0.434	0.913667	0.81		1.59167	1.19	0.891	1.861	1.86	1.4	1.78067	1.84	1.93	2.14	1.865		2.5	3	2.01		2.28	2.26	3.74933	3.34567	2.54	2.86	3.19	3.37	3.154	3.9092	3.02	3.1	2.7413	2.73	3.08	2.24	2.12	3.36	2.7	3.65657	1.77	5.892	6.75	3.76945	4.49		3.76
5	0.06	0.696	0.718667	0.560333	0.98	0.82	1.40633	1.41	2.079	1.464	1.27	1.45	1.562	1.73	1.62	3.21	2.585	1.92	1.19	2.87	2.1	3.20488	2.29	2.53	2.56833	3.288	2.77	3.49	4.95	7.34	3.27	3.393	6.43	5.25	3.7413	4.48	2.9	5.18	7.46	3.17	4.16	3.9775	6.14	4.23	3.89	7.31431	7.83	3.84	8.12
7	0.121	0.841	0.804	0.456333	1.14		1.61433	1.55	1.93	1.582	1.36	1.63	1.67567	1.97	1.67	2.1	1.75		1.1	2.66	2.84		2.96	1.64	2.44467	2.23333	2.81	3.66	3.62	2.84	3.82	3.5108	2.22	2.91	4.57826	4.92	4.51	3.45	4.5	5.44	7.1	4.74423	3.4	4.548	3.75	5.64566	5.44		6.34
8		0.72	0.818333	0.629	1.09	0.59	1.857	1.45	1.635	1.745	0.9	1.65	1.38633	1.98	1.91	2.65	2.292		1.68	2.61	3.13	2.79512	3.08	2.48	3.53733	4.328	3.57	2.65	4.43	2.13	3.292	3.4404	4.17	3.71	3.42174	6.26	3.24	5.38	1.67	3.52	5.56	5.23404	9.22	4.41	4.54	5.8574	6.48	6.3	8.29
9	0.032	0.8725	0.835	0.454	1.06	0.46	1.143	1.7	1.686	1.535	1.7	1.76	1.704	2.46	1.83	2.3	2.351	3.64	2.61	2.22	3.93	1.87561	3.85	2.16	3.006	3.17767	2.64	2.27	2.35	1.18	2.96	4.0558	3.03	3.8	3.41957	4.73	4.78	5	5.74	4.92	4.52	4.70521	5.88	4.818	7.49	4.48623	6.75	6.26	6.2
12	0.147	0.34			0.95	0.62		1.52	1.52	1.31	1.36	1.53		1.92	1.82	1.6	2.803	2.2	4.27	1.78	2.12	2.52927	2.35	2.14			2.82	2.9	4.12	3.36	3.582	1.99	3.37	4.39	5.17174	5.11	3.86	5.67	3.28	4.14	5.64	5.48299	6.35	4.825	4.85	7.60159	6.12	6.56	6.5
23			1.01933	1.28133	0.95	1.13	1.465	1.53	1.56	1.828	1.37	1.53	1.59433	1.96	2.18	2.96	2.988	2.21	1.56	2.24	2.97	3.58293	3.24	3.89	3.50733	3.069	3.64	2.21	2.51	2.66	3.31	3.6556		2.44	3.31739	4.09	4.98	4.42	4.62	4.59	4.6	6.39327	7.94	3.81	6.86	4.17462	6.95	8.93	7.26
62	0.019	0.71	0	0.838333	1.02	1.19	0.971667	1.5	1.611	1.167	1.44	1.62	1.02167	2.07	1.8	2.08	1.796	2.44	1.62	2.64	2.4	2.64878	2.59	2.59	2.90567	3.37633	3.27	3.26	2.61	3.98	3.588	2.0826	3.05	3.18	3.55217	3.86	4.54	4.42	1.56	5.18	4.94	4.73979	10.03	5.947	4.42	5.30714	4.72	7.1	6.22
Mean 10 ELWL	0.1235	0.668944	0.637963	0.814111	0.967	0.7875	1.53915	1.437	1.4873	1.5612	1.502	1.563	1.55285	1.949	1.855	2.382	2.1656	2.58	2.553	2.615	2.565	2.64055	2.716	2.453	2.87544	3.22611	2.967	2.922	3.256	3.437	3.3333	3.26292	3.49	3.594	3.63717	4.324	3.667	4.209	3.901	4.215	4.778	4.80517	5.583	4.6676	5.203	5.36203	5.898	7.0525	6.574
Ratio !0/rest	1.20679	1.03091	0.954243	1.00544	1.06626	0.767045	1.20977	1.04068	1.07994	1.1356	1.05819	1.08309	1.06574	1.02502	0.958479	1.11954	0.979974	1.15479	1.07803	1.08888	1.04918	1.06223	1.081	0.924083	1.05673	1.14792	0.997471	0.955943	1.02588	1.09382	1.0428	1.00683	0.989202	1.00125	1.01152	1.17116	0.946352	1.06883	0.94029	0.968859	1.13286	1.09741	1.24658	1.00746	1.11918	1.08594	1.07537	1.12003	0.98744
Overall advantage	1.057
[truncated: 68 more columns]

## Sheet: ELWLA 0-3h 2008+F-W plots
			New	New			New						New												New	New
CSDH	Yield/plant_S_Spain99	GrWt/plant/NFF_1994	Yield	dYield 2012	Yield/pl_droughted_Zaj06	Grain_wt/plant_rain_Kaz00adj	dYield 2011	Yield/pl_mn_Droughted_Zaj05	Diff_ear_dwt_SUSTExp2	moddrought_Yield/plant_T14_Krakow08	Yield/plant_sev_dr_Krakow10	Yield/pl_control_Zaj06	cYield 2013	Yield/pl_mn_Rainfed_Zaj05	GrainYd/plant_(Ht_adj)_N1_97	cont_Yield/plant_T35_Krakow08	Regr_adj_Yd/plant_Zaj02	Grain_yd/plant_irrig_Kaz00	Yield/plant_M_Spain99	Yield/plant_sev_drought_Krakow07	Yield/plant_rainfed_Zaj01	Grain_wt/plant/GH/1994	Yield/plant_irrig_Zaj01	GrainYield/plant_N2_97	cYield 2011	cYield 2012	GrainYd/plant_(Ht_adj)_N3_97	Yield/plant_cont_Krakow10	Yield/plant_mod_drought_Krakow07	Grain_yd/plant_A_Kaz98	Yield/plant_rain_Zaj00	Consel 2003(50pl/row)	Vern_Total_yield/pl_Krakow06	Yield/plant_control_Krakow07	Grain_wt/plant/Mor_1994	75ppb_Mn_Grain_wt/pl_03	GrainYd/plant_(Hr_adj)_N1_98	NFA_Mn_Grain_wt/pl_03	Non-vern_Total_yield/pl_Krakow06	GrainYd/plant_(Ht_adj)_N2_98	Conselice_Yield/plant_04	Yield_g/plant_adj(2,80)_Idice03	Grain_yd/plant_B_Kaz98	Yield/plant_irrig_Zaj00	GrainYield/plant_N3_98	Idice_Mn_Yield/plant_13%_04	Total_yield/plant_75ppb_05	Grain_yd/plant_A_Kaz99	Total_yield/plant_NFA_05
Mean	0.10375	0.652566	0.665461	0.810144	0.914526	1.00081	1.29895	1.38747	1.39001	1.39573	1.42819	1.45558	1.46676	1.90537	1.92421	2.1556	2.20612	2.26689	2.414	2.42426	2.45568	2.47	2.53432	2.63168	2.7365	2.85196	2.98116	3.04234	3.18269	3.19613	3.22173	3.25	3.52191	3.59	3.61	3.76682	3.86095	3.97202	4.081	4.34189	4.42	4.437	4.57978	4.64389	4.71242	4.96578	5.53	6.37733	6.64989
1	0.23	0.4505	0.521333	0.617	0.8	1.21	1.835	1.14	0.87	1.568	1.38	1.48	1.28067	1.63	2.15	2.74	1.796	3.05	4.03	3.51	1.96	1.96951	2.13	2.37	2.53367	3.38633	2.69	2.63	2.1	3.03	2.875	3.58	3.3	3.32	2.88696	3.73	1.93	3.71	4.16	3.81	3.7	4.3129	2.18	3.231	4.68	4.58993	3.81	8.23	5.83
2	0.272	0.7545	0.591	1.577	0.87	0.28	1.96833	1.38	1.091	1.552	2.38	1.58	1.97033	1.93	1.64	2.04	1.43	2.6	4.97	2.62	2.19	2.51829	2.39	2.47	1.62667	2.83067	2.92	3.29	2.68	4.48	3.482	3.0118	2.82	3.84	3.5413	3.33	2.85	2.62	3.9	4.02	4.86		2.92	4.965	4.8	4.87399	6.39	9.2	7.22
3	0.036	0.4005	0.727667	0.489333	0.92		1.10467	1.41	0.954	1.351	0.49	1.53	1.601	2.17	1.59	2.55	2.873	1.46	1.38	2.1	2.78	2.15122	2.75	2.72	3.99867	3.323	2.17	3.04	4.1	3.76	2.795	3.0752	3.37	3.3	3.35217	2.76	5.35	3.33	2.49	5.99	5.58	5.99969	4.86	5.222	4.54	5.12926	5.05	5.52	6.93
4	0.107	0.636	0.434	0.913667	0.81		1.59167	1.19	0.891	1.861	1.86	1.4	1.78067	1.84	1.93	2.14	1.865		2.5	3	2.01		2.28	2.26	3.74933	3.34567	2.54	2.86	3.19	3.37	3.154	3.9092	3.02	3.1	2.7413	2.73	3.08	2.24	2.12	3.36	2.7	3.65657	1.77	5.892	6.75	3.76945	4.49		3.76
5	0.06	0.696	0.718667	0.560333	0.98	0.82	1.40633	1.41	2.079	1.464	1.27	1.45	1.562	1.73	1.62	3.21	2.585	1.92	1.19	2.87	2.1	3.20488	2.29	2.53	2.56833	3.288	2.77	3.49	4.95	7.34	3.27	3.393	6.43	5.25	3.7413	4.48	2.9	5.18	7.46	3.17	4.16	3.9775	6.14	4.23	3.89	7.31431	7.83	3.84	8.12
7	0.121	0.841	0.804	0.456333	1.14		1.61433	1.55	1.93	1.582	1.36	1.63	1.67567	1.97	1.67	2.1	1.75		1.1	2.66	2.84		2.96	1.64	2.44467	2.23333	2.81	3.66	3.62	2.84	3.82	3.5108	2.22	2.91	4.57826	4.92	4.51	3.45	4.5	5.44	7.1	4.74423	3.4	4.548	3.75	5.64566	5.44		6.34
8		0.72	0.818333	0.629	1.09	0.59	1.857	1.45	1.635	1.745	0.9	1.65	1.38633	1.98	1.91	2.65	2.292		1.68	2.61	3.13	2.79512	3.08	2.48	3.53733	4.328	3.57	2.65	4.43	2.13	3.292	3.4404	4.17	3.71	3.42174	6.26	3.24	5.38	1.67	3.52	5.56	5.23404	9.22	4.41	4.54	5.8574	6.48	6.3	8.29
9	0.032	0.8725	0.835	0.454	1.06	0.46	1.143	1.7	1.686	1.535	1.7	1.76	1.704	2.46	1.83	2.3	2.351	3.64	2.61	2.22	3.93	1.87561	3.85	2.16	3.006	3.17767	2.64	2.27	2.35	1.18	2.96	4.0558	3.03	3.8	3.41957	4.73	4.78	5	5.74	4.92	4.52	4.70521	5.88	4.818	7.49	4.48623	6.75	6.26	6.2
10	0.015	0.9375	0.86	0.0413333	1.02	0.31	1.45133	1.51	1.709	1.349	1.64	1.63	1.694	2.35	2.72	2.52	2.839	1.6	1.69	1.46	2.93	3.62195	3.16	3.6	2.874	2.21533	4.27	1.42	3.8	5.16	4.269	4.7688	2.37	3.96	3.76087	4.6	4.84	4.14	5.73	5.23	5.72	4.46791	6.6	6.965	5.06	4.60256	6.9	5.07	7.71
11	0.135	0.5825	0.403	0.654333	0.85	0.72	1.28433	1.48	1.28	1.235	1.36	1.55	1.42767	2.04	1.77	2.76	1.469	1.13	1.99	2.81	2.86	1.7	2.81	2.74	3.124	2.71533	3.77	2.5	3.95	3.94	2.631	4.7336	2.27	4.75	3.55217	3.73	4.03	3.72	5.12	4.09	3.66	3.54706	5.07	4.685	5.34	3.77902	4.54	5.19	5.64
12	0.147	0.34			0.95	0.62		1.52	1.52	1.31	1.36	1.53		1.92	1.82	1.6	2.803	2.2	4.27	1.78	2.12	2.52927	2.35	2.14			2.82	2.9	4.12	3.36	3.582	1.99	3.37	4.39	5.17174	5.11	3.86	5.67	3.28	4.14	5.64	5.48299	6.35	4.825	4.85	7.60159	6.12	6.56	6.5
13	0.316	1.026	0.673333	0.989667	0.89	1.3	1.97733	1.31	1.15	1.783	2.03	1.34	1.82933	1.96	2.23	1.56	3.47	3.53	0.94	2.75	2.54	3.28415	2.51	2.81	2.4	3.29833	5.16	3.05	3.62	2.83	3.183	3.0824	4.18	5.2	4.32391	5.26	3.72	4.77	2.75	4.64	3.16	5.22546	3.91	4.822	4.41	5.88681	6.13	8.35	7.04
14	0.043	0.7785	0.932667	0.721667	0.82	0.24	1.60067	1.17	1.305	0.892	1.84	1.3	1.72167	1.68	1.47	1.48	2.296	1.67	2.64	2.32	1.88	2.37195	1.96	3.18	2.969	3.30567	2.85	2.11	2.25	3.3	2.44	3.946	1.96	2.96	2.73043	4.09	4.77	3.59	5.26	4.78	3.56	5.50026	6.42	4.052	4.22	6.08465	5.19	6.3	5.98
15	0.113	0.5495	1.02067	1.67433	1.2	0.26	1.64533	1.58	1.705	1.31	1.39	1.66	1.6	2.16	1.46	2.25	2.054	1.11	3.3	2.35	2.83	1.86098	2.86	2.41	2.63867	2.608	2.7	2.45	2.94	2.83	3.55	3.7138	3.26	3.13	4.13913	3.55	4.93	5.3		4.54	4.58	5.0598	6.24	4.972	4.63	5.05517	6.74	4.82	7.32
16	0.088	0.33			0.93	0.84		1.33	1.215	1.684	1.7	1.18		1.72	1.92	2.39	1.997	2.37	1.41	2.71	2.86	1.83293	2.83	2.38			3.12	3.97	2.18	2.63	2.243	3.335	4.56	3.22	4.11304	5.23	1.87	5.52	3.55	2.81	2.22	3.48927	6.29	3.844	3.38	3.59811	6.01	3.99	8.17
17	0.033	0.5015	0.617	0.76	0.97	0.72	1.18967	1.44	1.39	1.092	1.37	1.4	1.75467	1.91	1.96	1.18	1.838	2.37	1.87	2.17	2.56	2.69634	2.56	2.47	2.25533	2.31233	3.35	2.82	3.13	2.73	2.167	3.7696	3.64	3.89	3.72609	5.42	4.38	4.98	3.53	6.59	3.94	4.28652	6.18	3.085	7.28	5.31836	5.29	5.56	6.94
18	0.207	0.786	0.397	0.853667	1.24	2.98	1.41867	1.62	2	1.501	1.16	1.71	1.821	2.16	2.68	1.93	3.069	1.98	1.68	2.15	3.4	2.84268	3.75	4.05	3.69733	3.94467	4.33	3.37	4.13	4.49	3.648	4.4896	4.58	4.91	3.7	4.09	4.2	2.73	4.47	5.18	4.1	5.75226	3.21	5.281	5.29	4.75296	4.4	6.43	6.82
19	0.09		0.621	1.62767	0.86	1.5	1.76433	1.33	1.019	1.287	1.34	1.43	1.36733	1.84	2.15	2.21	1.989	2.35	2.95	1.86	2.02		2.29	2.9	3.24467	3.12233	2.11	3.14	3.51	3.76	3.881	3.4462	2.88	3.27		3.88	2.94	5.18	3.03	5.75	5.18	4.28518	4.6	5.48	3.38	5.36436	5.98	5.62	7.38
20	0.124	0.6275	0.980667	1.48067	1.01	0.47	1.31267	1.58	1.077	1.155	1.93	1.56	1.81767	2.11	2.62	2.28	2.569	2.2	3.09	3.59	2.91	3.25	2.97	3.53	2.53233	2.31833	3.77	3.48	3.26	2.24	3.8	4.6176	4.97		3.98913	4.47	3.83	5.03		5.49	3.86	5.44696	2.62	4.676	6.52	5.9214	5.46	6.11	7.68
21	0	0.8675	0.822667	0.811	0.85	1.6	0.541667	1.4	1.83	1.653	1.53	1.53	1.46433	1.98	2.35	2.02	2.014	2.49	1.13	2.47	2.74	3.34146	2.8	3.01	2.053	2.99833	3.21	2.92	3.02	1.91	2.704	3.3638	5.48	2.49	4.38478	4.63	3.02	4.38	7.15	3.73	2.92	4.04284	5.46	4.223	3.85	5.21892	5.66	7.39	6.21
22	0.097	0.7875	1.04567	0.532667	1.17	1.29	1.37567	1.55	1.565		1.51	1.82	1.647	2.01	2.63	1.74	2.042	2.1	3.01	2.16	2.99	2.61829	2.93	3.07	3.88267	3.606	4.44	3.12	2.55	3.94	2.964	3.2696	3.04	4.09	3.80435	5.39	6.57	4.41	4.36	6.23	6.16	4.69	4.2	4.596	5.71	6.66022	6.02	7.11	7.01
23			1.01933	1.28133	0.95	1.13	1.465	1.53	1.56	1.828	1.37	1.53	1.59433	1.96	2.18	2.96	2.988	2.21	1.56	2.24	2.97	3.58293	3.24	3.89	3.50733	3.069	3.64	2.21	2.51	2.66	3.31	3.6556		2.44	3.31739	4.09	4.98	4.42	4.62	4.59	4.6	6.39327	7.94	3.81	6.86	4.17462	6.95	8.93	7.26
24	0.211	0.482	1.35667	0.843	1.1	1.11	1.81167	1.59	1.529	1.837	1.57	1.72	2.081	2.25	1.7	1.78	2.652	3.33	2.63	3.35	3.4	2.52317	3.4	2.95	3.68367	4.16067	3.68	3.16	4.47	4.28	3.458	4.7666	2.89	5.29	4.55	3.65	5.26	2.73	5.46	4.31	4.46	4.63479	5.04	5.401	6.47	4.85885	6.86	10.76	6.78
25	0.061	0.786	1.041	1.54933	0.9		1.15267	1.44	1.08	1.687	1.27	1.47	1.86	1.93	1.59	2.23	3.231		2.03	2.12	1.57		1.93	1.91	3.77533	3.764	1.75	3.69	2.95	1.15	3.065		2.91	3.64	1.31304	2.98	2.6	3.31	2.06	3.99	4.62	4.90278	1.15	4.869	4.65	4.45915	5.87		6.06
27	0.042		0.716	0.515667	1.03	0.52	1.126	1.39	0.989	1.387	1.57	1.26	1.06867	1.77	1.51	1.49	2.318	2.92	3.21	2.23	2.4	2.37927	2.54	2.03	2.42533	3.40533	2.45	2.62	3.61	2.92	2.621	2.8182	3.82	3.59	3.64565	4.03	3.99	3.89	3.42	3.53	3.62	3.48089	4.31	3.154	4.55	4.04054	5.62	7.38	6.27
28	0.24	0.688	0.786	1.24367	0.91	0.92	0.207667	1.43	1.211	0.616	1	1.42	1.765	1.82	1.63	1.34	2.005		5.51	2.29	2.55	1.87805	2.55	3.37	3.03133	1.53333	1.36	2.43	2.17	3.78	3.271	3.0662	2.73		5.84565	2.66	4.27	3.29	3.83	6.09	4.98	5.12523	4	5.305	6.11	6.10168	4.43	3.69	4.72
29	0.017	0.69	0.325	0.830333	0.97		1.10933	1.4	0.915	1.483	1.85	1.34	1.133	1.73	1.7	1.39	2.515		2.37	2.6	2.61		2.59	2.58	2.24	2.39033	3.96	2.13	3.48	3.94	3.256	3.369	3.29	4.17	3.73261	1.82	4.27	2.78		5.21	3.7	3.78851	3.68	4.751	6.48	3.74962	5.72		5.6
30	0.225	0.6095	0	0.508333	0.89	1.62	1.20033	1.41	1.809	1.377	1.6	1.31	1.05267	1.72	2.1	1.88	1.359	1.68	4.27	1.92	2.79	2.66341	2.74	2.52	1.794	2.60967	3	2.24	3.34	2.02	3.196	2.6772	2.79	3.08	2.92174		2.91		5.53	3.03	2.72	5.0432	5	3.563	6.17		5.33	6.33	7.79
32	0.141	0.878	0.549667	0.728333	0.95	0.59	1.703	1.59	1.585	1.513	1.15	1.55	1.66667	2.09	1.97	1.97	5	1.86	3.12	2.93	2.4	1.84634	2.61	2.37	3.22033	2.66733	2.77	3.58	3.83	5.31	3.829	3.5294	4.92	2.94	4.5587	4.66	3.98	4.48	4.16	4.53	2.58	5.15443	4.82	4.963	4.27	5.16812	6.59	5.1	7.3
33	0.187	0.8945	0	0.333333	0.98	1.83	2.06167	1.61	1.445	1.493	1.91	1.67	1.502	2.36	2.55	2.55	1.976	4.04	3.31	2.86	2.46	2.77439	2.54	2.8	2.52367	3.07233	3.22	2.84	3.97	5.72	3.708	3.2324	1.89	4.16	4.15217	3.99	4.38	3.86	4.39	4.14	3.24	3.48416	5.57	4.323	3.97	5.42744	5.38	10.44	6.72
34	0.158	0.6125	0.559333	0.479667	0.84	0.67	0.642333	1.26	1.299	1.581	1.03	1.31	1.201	1.61	1.59	1.91	1.018	2.32	2.5	1.93	2.88	2.02195	2.89	1.9	2.69933	2.41033	2.58	2.67	2.38	1.84	2.355	2.7458	3.54	2.12	1.73913	2.28	2.72	2.94	5.31	3.57	3.24	3.75713	2.93	4.607	2.93	3.33536	4.97	4.13	4.7
35	0.028	0.5425	0	0.674	0.86	1.24	0.922	1.29		1.397	1.43	1.39	0.87	1.73	2.26	1.75	1.784	1.55	0.56	2.21	1.73	2.73902	1.93	1.85	2.078	2.055	2.31	3.52	2.77	3.1	2.469	3.3914	3.15	2.96	2.27391		3.06		4.52	3.37	4.84	4.89862	2.55	2.727	3.06	4.85257	4.99	5.68	5.46
36	0	0.587	0.297333	0.201	0.96	0.1	0.424667	1.34	1.345		1.26	1.51	0.871	1.72	2.04	1.9	1.792		1.11	2	3.01	1.20976	2.97	2.91	2.88633	2.598	2.98	2.52	2.58	3.48	2.374	3.428	3.39	2.79	3.80652	2.05	5.57	2.33	2.45	4.55	3.48	3.48354	4.94	3.803	4.46	3.83419	4.43	6.75	6.33
37	0.136	0.696	0.701333	0.566667	0.88	1.44	0.505	1.3	1.45	1.346	1.31	1.37	0.854667	1.71	1.84	1.76	1.508	1.94	0.93	2.09	2.66	1.4622	2.57	2.5	2.51467	2.81167	3.59	2.33	2.19	5.22	2.61	3.3076	3.36	2.5	2.64565	3.28	3.56	4.55	4.43	3.83	3.86	4.72012	10.84	4.409	4.34	4.59078	5.79	5.45	5.71
38	0.061	0.566	0.152667	0.399333	0.72	0.93	0.959667	1.06	1.33	1.4	1.36	1.24	1.25633	1.52	1.17	0.88	2.201	2.05	1.73	1.39	1.55	1.54634	1.49	1.66	1.992	2.447	2.13	2.6	1.58	4.88	1.843	3.0526	2.01	1.62	2.85435	1.59	2.51	1.08	2.94	1.86	4.68	3.2946	4.3	3.728	2.15	2.61553	1.74	4.49	3.96
39	0.093	0.693	1.36333	0.649333	0.84	0.86	1.37133	1.39	1.375	1.702	1.62	1.5	1.59567	1.84	2.31	1.47	1.412	2.41	2.91	2.76	2.18	3.05488	2.32	4.09	2.35867	2.867	2.87	3.32	3.27	3.09	3.88	2.7348	4.75	2.68	3.30652	5.62	3.73	4.69	3.71	4.03	4.42	3.95446	4.74	4.025	3.24	6.20766	6.04	6.22	7.87
40	0.143	0.47	0.662	0.478667	0.72	0.3	1.412	1.02	1.09	1.19	1.75	1.14	1.18567	1.41	1.89	1.34	1.51	1.01	1.82	2.16	1.59	2.67317	1.53	2.46	2.23	2.02567	3.4	2.41	3.27	2.46	1.8	2.7388	2.76	2.5	4.07826	2.44	2.39	2.52	2.68	2.58	2.92	3.95261	3.58	3.513	2.82	3.6314	3.55	3.54	5.26
41	0.069	0.325	0.602	0.0983333	0.86	0.12	1.39033	1.43	1.215	1.177	1.2	1.37	1.457	1.89	1.35	1.15	1.764	3.17	3.8	1.25	2.73		3.05	1.17	2.824	1.63033	1.6	2.68	2.47	4.24	2.73	2.5958	1.26	1.75	2.83043	0.99	5.2	1.33	0.56	7.02	4.06	2.5103	3.08	4.468	5.64	3.67989	4.96	3.86	3.6
42	0.008	0.335	0.847667	0	0.81		1.26567	1.17	0.901	1.349	0.85	1.27	1.73133	1.63	0.91		2.2		0.66	1.45	1.85		1.94	1.4	2.01833	2.25533	1.87	2.57		4.96	1.811	2.1464	3.01	3.51	3.39783	2.49	3.85	1.66	0.23	4.35	3.4	1.98437	1.15	3.418	3.04	3.16852	2.4		3.42
44	0.018	0.419			0.92	1.28		1.38	1.319	1.891	1.35	1.29		1.7	2.21	0.75	1.849	2.48	1.2	3.22	2.92	2.36585	3	2.72			3.57	3.59	3.89	4.24	3.074	3.6634	3.18	4.85	2.64783	3.87	5.26	3.3	7.13	4.1	5.4	5.56551	5.66	4.564	4.13	6.21697	4.15	5.47	5.62
45	0.1	0.7105	0.593	1.04967	0.82		1.65567	1.26	1.6	1.368	0.93	1.51	1.52833	1.8	1.77		1.139		2.79	2.19	1.76		1.92	2.44	2.57833	2.931	2.89	2.26	2.89	4.96	3.541	3.8778	5.2	3.48	4.55435	2.52	2.82	4.32	2.78	4.24	2.32	3.18281	3.92	4.636	3.16	5.49529	5.45		7.03
46	0.113	0.9125	0.806667	0.747667	0.89	0.53	1.64967	1.42	1.68	1.325	1.19	1.36	1.46667	1.8	2.62	2.45	1.567	2.51	2.13	3.13	1.69	3.45976	1.74	3.28	2.393	3.49967	3.56	2.93	3.88	1.68	3.526	2.6952	4.62	3.61	3.6587	6.05	3.26	5.42	4.8	4.07	5.12	3.94689	8.07	4.547	4.52	5.60503	6.76	8.15	8.59
47	0.319	0.7645	0.728333	0.522333	0.81	1.12	1.185	1.28	1.606	0.835	1.22	1.26	1.41167	1.71	1.54	1.52	2.166	1.73	3.01	1.37	2.32		2.4	2.19	2.44833	2.52067	2.38	2.99	1.98	4.96	2.511	4.5988	1.59	1.93	2.73913	1.41	4.46	1.43	2.87	5.64		4.81501	2.49	3.371	4.92	3.9696	3.24	4.26	4.6
48	0.012	0.45	0.972333	0.592	0.85	0.63	1.392	1.46	1.709	1.203	1.3	1.63	1.49433	2.21	2.15	2.57	3.376	1.51	1.34	2.69	2.41	3.27439	2.66	2.99	3.42133	2.77267	3.18	3.55	4.27		3.979	3.4534	4.43	4.14	4.13478	5.07	5.32	3.23	6.08	5.19	5.02	5.83075	4.28	5.791	5.84	5.26098	6.86	8.82	7.33
50	0.062	0.4545	0.941667	0.409333	0.94	0.47	0.755	1.48	1.09	0.928	1.18	1.48	1.123	1.9	1.36	2.5	2.156	2.3	1.95	2.45	2.7	2.7	2.87	1.61	1.93	2.438	2.23	2.44	3.28	3.48	2.419	3.1034	3.57	3.23	4.41304	1.72	4.63	3.7	3.51	5.95	3.7	4.11155	6.49	3.292	4.74	4.82998	9.57	7.22	5.79
51	0.044	0.6965	1.34933	0.411	0.88	0.31	1.932	1.47	1.519	1.325	1.19	1.58	1.703	2.1	2.52	2.22	2.027	3.32	1.43	2.58	2.18	3.41585	2.24	3.19	2.47633	2.94933	3.53	3.95	3.54	3.1	2.656	2.7754	4.34	4.51	5.31522	3.87	3.61	5.12	4.62	4.09	4.96	3.79341	5.17	3.336	5.28	5.25232	5.89	7.78	9
52	0.068	0.7405	0.915667	0.914	0.93	2.46	1.271	1.5	1.575	1.462	1.68	1.42	1.67933	1.87	1.99	1.85	1.65	2.56	2.73	2.36	2.09	2.90732	2.09	3.01	2.42767	3.39333	3.1	2.8	3.34	2.02	3.934	3.3846	4.22	4.23	3.61739	4.52	3.44	4.03	4.16	4.08	4.7	4.68847	6.53	4.92	4.48	5.65324	6.89	6.17	7.11
55	0.063	0.6665	0.61	0.486667	0.75		1.50567	1.27	1.525	1.385	1.26	1.44	0.968	1.83	1.99	1.25	1.608		2.95	1.98	2.16		2.15	2.83	3.111	2.44333	2.94	1.96	3.59	3.11	2.873	2.9238	2.88	3.37	3.31739	3.02	3.42	3.93	1.58	4.66	3.64	2.91278	2.65	4.553	4.3	5.58329	3.99		6.07
56	0.134	0.926	0.718333	0.697667	0.77	1.12	1.019	1.32	1.35	0.846	1.28	1.55	1.613	1.94	2.99	2.24	1.282	2.01	2.84	3.31	2.22	3.44024	2.31	2.87	2.43467	3.489	4.49	3.29	3.86	3.86	3.536	3.0094	3.35	4.38	5.11304	4.66	4.2	5.06	4.41	5.44	4.1	5.63866	7.2	5.311	4.69	6.49488	7	9.52	7.9
57	0.152	0.3965	1.523	0.974	0.9	1.34	1.33633	1.39	1.014	1.074	1.87	1.45	1.65433	1.94	2.04	1.45	2.371	1.86	0.94	1.95	2.84	2.71341	3.03	2.24	2.28167	2.81333	1.91	2.84	3.89	2.97	3.129	3.7096	2.56	4.66	4.27391	4.65	3.51	4.69	4.61	3.3	4.32	4.48291	8.36	5.261	4.56	5.98191	7.17	5.97	7.95
58	0.253	0.809	0.655333	1.345	0.97	1.52	2.061	1.53	1.42	1.837	1.64	1.67	1.55733	2.22	2.16	2.89	2.756	3.47	3.99	2.97	2.73	2.40732	2.83	3.3	2.397	2.41967	3.51	3.71	3.82	2.95	4.338	3.6502	4.92	4.08	4.12609	4.66	4.61	5.69	3.72	4.11	6.58	4.29138	7.31	5.605	4.91	6.66661	7.34	9.9	8.81
59	0	0.3365	0.860333	0.756	0.64	0.48	0.599	0.93		1.472	1.21	0.95	1.46733	1.17	1.47	1.94	1.398	1.65	3.22	2.78	1.14		1.36	1.79	1.78933	2.55067	2.52	2.5	2.53	3.83	3.346	2.7812	1.9	2.89	2.82826		2.37		3.75	2.18	5.72	3.23484	3.83	4.975	2.64	5.50334	4.72	6.96	4.87
60	0.062	0.3985	0.717667	0.716333	0.94	2.13	1.71933	1.45	0.905	1.537	1.68	1.48	1.60567	2.04	2.63	2.28	1.998	1.75	3.83	2.6	2.48	2.70366	2.5	2.22	2.097	2.134	3.63	2.85	3.12	3.6	3.664	2.8068	5.28	2.72	5.06087		2.77		4.41	2.99	4.14	3.65329	6.04	4.628	2.54	5.12152	5.61	4.01	6.07
61	0.135	0.709	0.333667	1.02833	0.72	1.26	1.04	1.26	0.99	0.935	1.62	1.4	1.026	1.81	1.79	1.66	1.287	2.48	2.38	1.84	2.99	2.45976	2.99	3.24	1.54333	3.15767	3.01	2.81	2.51	3.29		2.1888	6.07	2.69	3.65652	4.04	3.12	3.39	3.78	3.8	5.02	5.20903	4.7		5.23	4.75809	6.06	6.1	6.28
62	0.019	0.71	0	0.838333	1.02	1.19	0.971667	1.5	1.611	1.167	1.44	1.62	1.02167	2.07	1.8	2.08	1.796	2.44	1.62	2.64	2.4	2.64878	2.59	2.59	2.90567	3.37633	3.27	3.26	2.61	3.98	3.588	2.0826	3.05	3.18	3.55217	3.86	4.54	4.42	1.56	5.18	4.94	4.73979	10.03	5.947	4.42	5.30714	4.72	7.1	6.22
63		0.68	0.569667	1.29767	0.83	0.22	0.796333	1.35		1.345	1.56	1.45	2.07533	2.08	1.77	2.88	3.75	1.87	1.31	1.91	2.41	2.98659	2.75	2.7	2.559	2.74233	3.37	2.58	4.01	2.38	1.853	3.506	2.93	4.21	2.63478	4.22	3.3	4.09	4.48	3.64	4.36	4.65117	2.62	3.532	3.85	5.72352	5.97	5.08	6.96
65	0.083	1.0225	0.817333	1.838	1.06	1.77	0.793667	1.58	1.475	1.379	1.98	1.41	1.50133	1.98	1.76	2.97	3.418	1.77	2.12	1.62	2.08	$0	2.18	2.91	1.92767	2.77267	3.73	3.32	3.74	4.05	4.003	2.9952	4.75	3.83	4.13261	4	3.54	5.61	4.51	4.89	3.86	4.39131	3.71	4.4	4.97	4.53938	6.21		7.25
66	0.077	0.6465	0.324333	0.66	0.91	2.23	1.76567	1.39		1.275	1.6	1.25	1.53067	1.96	2.39	2.7	2.766	2.41	1.74	2.03	3.17	2.51951	3.14	3.3	3.68667	4.413	3.3	3.68	3.31	4.68	4.064	2.2626	2.3	3.74	4.46087		3.82	5.55	3.24	5.22	4.7	3.47578	6.26	5	5.94	6.59862	6.48	6.32	8.99
67	0.348	0.775	0.506667	0.648	0.71	0.99	1.72967	1.24	1.075	1.405	1.07	1.36	1.529	1.66	2.11	2.76	1.448	2.17	3.43	2.81	2.37	2.81463	2.4	2.17	2.719	2.68	2.43	3.35	3.15	2.48	3.518	3.1558	4.38	3.18	3.36304	4.6	3.13	5.21	3.75	3.69	4.02	3.85249	2.95	4.442	4.6	4.15485	5.97	4.69	7.36
69	0.054	0.743	0.723333	1.96967	0.99		1.84367	1.54	1.219	1.321	0.96	1.44	1.59233	2.03	2	1.64	3.569		1.58	2.86	2.66	0	2.62	3.29	3.54	3.10167	2.46	2.6	2.72	3.34	3.028	3.4966	2.82	3.85	4.0587	3.7	3.9	4.9	3.08	5.43	4.08	5.66044	1.6	3.811	5.7	5.11739	3.21		7
70	0.221	0.5635	0.662667	0.933	0.83	0.68	1.28667	1.29	1.095	2.058	2.06	1.12	1.34933	1.64	2.16	2.12	2.228	2.47	1.85	2.57	1.79	2.38902	2.03	3.18	1.892	2.70367	3.15	3.25	2.45	2.41	3.74	3.629	3.45	3.02	2.51522	4.65	1.89	5.27	3.69	2.3	3.3	3.62998	5.98	4.877	3.52	4.17901	3.9	4.79	6.24
72	0.095	0.452	0.414667	0.792333	0.74	1.22	1.09733	1.12	1.386	1.727	1.37	1.03	1.27867	1.43	1.69	2.38	1.82	1.43	1.79	1.79	2.1	1.9	2.08	1.98	2.105	2.768	2.35	3.16	1.98	1.48	2.53	3.7254	4.67	2.43	3.41522	4.34	2.33	4.35	5.88	2.24	4.34	3.96407	3.8	3.889	2.23	3.08222	4.24	6.17	6.23
80	0.143	0.5805	0.473667	0.45	0.89		1.02567	1.34	1.446	1.063	1.5	1.47	1.232	1.84	1.63	2.27	2.28		0.92	2.45	2.32	1.89024	2.26	2.95	2.92167	2.74567	2.29	3.45	2.05		3.129	2.308	2.79	3.18	3.12174	2.98	4.4	2.99	3.23	4.03	3.26			5.483	4.46	2.97533	4.21		5.56
86	0.11	0.5515	0.272667	0.771667	1.23	1.5	1.04133	1.54	1.46	1.431	0.86	1.66	1.44933	2.03	1.76	2.59	1.723	2.14	2.23	2.37	2.85	2.26951	2.81	2.93	2.76333	3.20733	3.21	2.38	2.07	2.5	2.36	2.5196	2.4	3.87	2.76304	3.41	3.04	4.19	3.95	3.3	4.54	4.46722	2.93	3.706	3.4	5.16634	4.43	5.93	6.16
87	0.075	0.659	0.927333	0.82	1.06	0.52	1.245	1.55	1.7	1.588	1.5	1.77	0.948	2.28	1.76	2.18	2.887	1.61	2.6	2.82	3.06	1.91707	2.8	3.29	3.62167	3.01867	3.06	3.16	2.98	1.27	4.53	3.7874	1.74	3.28	4.75652	3.13	3.45	3.95	7.31	3.5	4	4.37787	5.67	5.368	4.16	4.82717	5.23	6.23	7.1
88	0.055	0.368	0.645333	0.776	1	2.42	0.524667	1.49	1.59	1.29	1.39	1.49	1.37867	1.99	2.29	2.14	2.105	2.08	1.42	2.59	2.87	3.32073	2.88	2.94	2.43867	2.36667	2.51	3.38	3.12	1.26	3.238	2.5024	3.8	3.52	3.41522	3.63	3.27	5.41	6.41	3.88	4.78	4.84951	3.71	4.849	4.76	6.72609	6.74	7.14	6.64
90	0.284	1	0.969	0.107667	1.02	0.73	1.80433	1.6	2.42	1.104	1.33	1.76	1.95133	2.29	2.59	2.48	2.99	4.29	2.56	2.46	2.82	3.45366	2.89	3.23	2.80267	3.63567	4.32	3.81	4.19	1.71	5.356	3.9534	2.51	3.6	4.3087	3.87	4.56	4.8	4.91	4.66	4.48	5.74298	5.93	5.733	5	6.02485	7.95	8.47	11.03
91	0.072	0.612	0.822667	0.123667	1.03	0.25	1.18167	1.62	1.7	1.189	1.65	1.57	1.58367	2.17	2.2	1.67	2.639	3.89	1.69	2.07	3.72	1.51829	3.99	2.64	2.79033	2.77133	3.45	3.46	3.11	3.19	4.685	4.1784	5.84	4.17	2.11739		4.62		6.93	4.5	3.84	5.10172	4.31	5.134	4.57	3.9102	7.49	6.06	7.9
92	0.03	0.4645	0.325	0.217667	0.88	1.76	0.803333	1.35	1.399	1.584	1.67	1.23	0.857667	1.72	1.83	1.27	1.418	1.95	2.11	2.92	2.46	1.83415	2.4	2.38	2.10333	2.483	3.48	1.99	2.82	2.55	3.082	3.1038	3.84	3.34	2.1413	3.31	3.93	2.84	4.69	3.22	4.46	3.66045	1.56	5.156	5.2	4.88765	6.05	6.63	5.98
93	0.071	0.4825	0.634667	0.529333	1.16	0.65	1.402	1.62	1.26	1.377	1.49	1.76	1.21567	2.36	2.4	2.08	3.015	2.35	2	2.31	2.93	3.73415	2.85	2.87	2.15867	3.59233	3.71	2.22	3.53	3.33	4.643	3.5184	4.22	3.54	4.0087	3.9	2.99	4.71	4.9	3.31	3.84	4.03763	4.52	5.608	4.91	4.67829	5.94	9.02	6.72
94	0.033	0.6235	0.106667	0.0823333	0.76	0.45	0.386667	1.28	1.109	0.995	0.66	1.34	0.899667	1.78	1.69	1.71	0.731	1.02	3.42	1.76	2.17	2.58293	2.28	2.17	2.14333	2.64467	1.64	2.81	2.61	1.59	3.359	2.4722	3.55	3.53	3.48696	2.52	3.21	3.5	4.79	3.1	4.92	3.14145	5.27	4.409	5.09	5.72642	3.07	7.01	5.01
96	0.12	0.794			0.82	3.14		1.2		1.492	1.74	1.41		1.88	2.18	2.89	2.055	3.18	4.58	2.46	1.91	2.58537	2.01	2.65			4.23	2.45	2	2.14		2.9606	4.06	3.79	4.23478		4.03		5.93	3.58	4.68	4.85012	3.47	4.657	4.02	4.60331	5.67	8.13	6.96
97	0.021	0.7675	0.482333	0.369333	0.69	1.28	1.60967	1	1.365	1.413	1.13	1.38	1.30033	1.65	2.12	2.67	1.207	1.99	1.87	2.65	1.93	2.9	2	2.6	2.41767	3.24533	2.3	3.74	3.12	3.19	2.444	2.8756	3.36	3.99	1.49565	4.77	3.65	5.34	4.92	3.44	2.82	3.55923	8.2	3.797	3.85	6.2858	6.59	2.9	6.67
98	0.411	1.0495	0.609333	2.35733	0.79		1.95433	1.18		1.456	1.47	1.48	2.134	1.9	1.3	2.91	2.014		3.22	2.99	1.86		1.98	1.5	2.89967	2.93367	2.3	4.24	3.85	2.55	3.086	2.5708	3.31	4.6	3.6413	3.24	2.88	3.57	1.21	4.2	2.9	5.09316	$0.55	4.577	4.97	5.49017	6.95		6.5
102	0.1	0.9335	0.259667	0.834667	0.95		1.34567	1.46	1.521	1.244	1.24	1.67	1.527	2.23	2.16	3.15	2.836		3.26	2.18	2.15		2.24	3.24	3.128	2.08967	3.04	4.04	4.03	3.33	4.038	3.439	2.51	3.57	4.62174	3.18	4.77	4.24	2.94	4.02	6.42	4.96993	2.39	5.78	5.41	5.66941	5.07		7.62
104	0.057		0.747	0.381	1.02		0.55	1.61	0.971	0.798	1.71	1.52	1.67267	2.07	2.44	2.42	2.6	1.16	3.15	2.97	3.44	1.85122	3.54	2.93	2.824	2.499	2.77	2.59	3.09	1.15	3.954	1.9632	4.53	3.67	3.12391	4.22	4.37	3.55	5.28	4.6	3.42	4.51962	2.44	5.58	5.34	4.7231	6.38	2.8	8.8
105	0.007	0.545	0.684	0.896333	0.77		1.51633	1.07	1.339	1.394	1.59	1.06	1.23433	1.55	1.92	2.19	1.957	1.43	2.04	1.56	2.27	1.66707	2.2	3.12	2.99	2.51933	3.75	3.97	2.86	3.54	3.011	3.2616	2.98	1.87	2.92826	3.44	3.74	4.02	4.59	4.48	3.96	5.1125	4.11	4.87	5.98	4.41911	5.61	7.63	7.09
114	0.176	1.024	0.239667	0.455	1.07		0.737	1.56	1.56		1.82	1.5	0.718	2.03	2.16	2.37	2.122		2.62	2.72	3.32		3.34	2.63	2.95867	3.19333	3.12	3.39	3.92	4.63	3.402	3.6192	2.48	3.92	4.41087	4.31	5.76	4.01	3.52	7.85	4.64	5.54505	1.82	5.411	4.08	4.41642	6.22		6.5
115	0.018	0.567		2.68533	1		0.664	1.55	1.066	1.962	1.79	1.69		2.3	1.12		2.505		2.09	3.19	2.51		2.48	1.28	3.75167	2.697	1.74	3.71	3.79	3.54	2.917	2.681	3.31	3.95	2.39348	3.99	3.09	3.38		3.26	4.62	4.12311	1.85	6.6	3.94	3.19069	4.86		5.53
124	0.01	0.729	0.737	0.735	0.81	0.95	0.861333	1.17	1.275	1.663	1.36	1.15	0.87	1.72	1.64	3.25	2.281	3.18	0.61	3.53	2.33	1.9378	2.31	3.09	3.24733	3.277	3.4	2.66	3.26	2.88	3.415	1.942	4.13	4.49	2.66522	2.32	4.98	3.39	5.93	4.24	3.3	4.44024	3.7	6.335	5.04	3.30927	5.46	2.57	5.45
127	0.102	0.4165	0.763	0.447333	0.86	1.14	1.60467	1.42	1.325		1.34	1.29	0.856667	1.76	1.71	2.15	3.29	2.29	1.48	2.72	2.31	1.98171	2.31	2.86	1.68733	2.71533	2.39	2.19	2.63	1.44	3.338	2.781	4.42	4.28	2.7413	3.64	2.57	3.94	3.5	2.26	4.62	4.5431	4.17	4.605	5.82	4.25953	3.79	7.11	4.91
143	0.053	0.456	1.08133	1.65333	0.84		1.80533	1.37	1.2	1.332	1.77	1.53	1.86133	1.91	1.77	3.61	2.246		1.36	3.62	1.67		1.75	2.62	3.44867	1.587	2.43	4.05	4.91	2.45	3.288	3.9504	4.66	4.83	3.86957	4.56	5.96	6.33	3.18	6.33	3.44	5.37124	2.05	4.487	5.69	5.58945	4.97		6.65
144	0.073	0.4265	0.588333	0	0.81	0.2	0.137	1.2	1.45	1.04	0.47	1.37	1.30833	1.65	1.51	1.33	2.357	1.31	1.03	1.31	2.17		2.13	1.66	2.942	1.65533	1.47	2.94	2.29	3.2	1.77	2.5386	1.17		2.75652	1.74	3.31	1.3	$0.6	4.52	3.44	4.13712		3.09	2.7	4.37752	2.95		4.88
146	0.053	0.678	0.748333	1.05733	0.98		0.996333	1.56	1.829	1.719	1.27	1.51	1.772	2.05	1.6	3.09			7.97	2.54	2.18		2.26	2.11	2.83133	2.58733	2.4	4.05	2.97	3.14	3.666	4.2024	3.39	3.92	5.11739	3.92	5.13	3.61	2.18	8.65	4.46	5.04423	1.8	4.831	7.48	5.94315	5.33		6.67
Mean	0.106074	0.650631	0.666633	0.782517	0.915	1.02318	1.26768	1.39107	1.38688	1.39383	1.42845	1.45536	1.45314	1.90821	1.94167	2.13481	2.20852	2.24727	2.37929	2.42607	2.47345	2.48261	2.54679	2.63107	2.7059	2.8458	2.9844	2.98821	3.1841	3.21622	3.21777	3.25737	3.48012	3.55988	3.58743	3.77299	3.83083	3.99962	4.09203	4.32583	4.21766	4.44975	4.60111	4.63148	4.67393	4.98435	5.53167	6.3091	6.58929
Mean 2008	ELWLA 0-3h
26	0.177	0.934	0.661667	3.37167	0.85		2.27233	1.36		2.004	1.97	1.58	2.04067	2.03	1.61	1.99	1.431		5.49	3.05	2.04		2.07	2.24	2.864	3.90033	2.51	4.44	2.93	2.3	2.354	2.7438	3.32	2.98	4.88478	2.66	5.31	2.79	3.88	4.98	3.3	3.30443	1.8	3.395	7.12	5.89266	4.98		7.45
31	0.034	0.592	0.358333	0.445	1.3		1.467	1.77	1.821	1.37	1.61	1.87	1.51733	2.42	1.83	2.11	2.475		1.95	2.78	3.27	2.46341	3.41	3.1	3.55433	2.58567	3.32	3.69	4.32	2.6	4.393	2.5646	4.53	4.7	2.94783	2.38	4.56	3.46	2.84	4.39	3.92	4.6969	2.32	5.68	5.22	5.03851	6.38		7.73
43	0.009	0.428	0.559667	0.951	0.85	1.32	1.70667	1.31		1.032	1.52	1.23	1.38867	1.65	1.77	1.26	2.154	3.07	2.59	2.71	2.01	2.14634	2.05	3.08	4.07967	3.64167	2.74	3.94	2.28	1.68	2.87	3.1676	5.3	4.77	3.22609	3.53	5.4	2.63	5.39	4.88	5.42	3.96248	6.41	4.307	4.66	4.02183	5.57	8.88	6.63
49	0.064	0.4	1.122	0.380333	0.8	0.94	1.21567	1.15	1.049	0.622	1.08	1.42	1.64933	1.6	1.17	1.68	2.42	4.26	1.86	0.75	1.69	1.93415	1.64	1.69	2.63833	1.51867	1.93	2.7	1.65	5.22	1.969	3.2958	1.51	1.38	1.70652	1.76	4.02	2.39	1.98	3.13	3.6	3.00819	6.78	3.44	5.45	2.56613	3.02	7.27	4.46
53	0.05	0.444	0.419667	1.39767	0.85	1.05	1.60633	1.42	1.56		1.01	1.4	1.47733	1.94	1.83	2.82	3.13	1.95	2.05	2.82	2.53	3.15122	2.81	3.07	2.427	2.68733	2.58	3.96	3.75	3.56	2.871	3.4882	4.61	4.74	3.98696	5.21	4.04	5.4	6.38	5.58	4.74	5.3819	4.17	5.283	5.02	4.49863	6.45	3.88	9.17
54	0.193	0.861	0.738333	0.204	1.06	0.74	1.86233	1.61	1.819	1.522	1.23	1.62	1.63433	2.19	2.01	1.72	2.923	2.99	1.06	2.39	2.98		3.21	3.42	2.79933	2.89167	3.08	3.01	3.71	2.9	3.837	3.4456	3.12	4.73	3.29565	2.52	4.32	3.24	5.02	4.93	4.3	4.30286	3.35	5.501	5.12	6.3555	5.92	6.15	8.04
64	0.115	0.7015	0.921333	1.07867	0.95	1.34	1.30733	1.37	0.985	1.658	1.61	1.33	1.51667	1.95	2.17	3.06	1.851	2.13	1.7	2.6	2.71	2.59756	2.73	2.86	3.31733	3.08867	3.25	2.71	2.4	2.09	3.508	3.7104	2.94	2.29	4.33478	4.52	4.28	3.72	4.24	4.15	4.78	4.49007	5.28	5.609	4.95	5.932	4.17	6.74	6.15
71	0.102	0.9655	0.681667	1.70733	0.81	0.34	1.69767	1.31	1.58	1.997	1.22	1.5	1.985	1.85	2.06	2.94	1.857	2.05	2.96	1.93	2.19	2.66098	2.27	2.19	2.54033	3.284	4	4.11	4.27	2.87	3.537	2.8766	5.17	4.81	5.94783	4.84	2.82	4.33		4.39	3.54	5.08724	5.8	4.357	4.02	5.66927	5.67	9.25	7.05
99	0.013	0.516	0.493	0.440333	0.8	0.49	1.18633	1.18	1.535	1.232	1.42	1.41	1.36833	1.75	1.69	2.71	1.526	0.81	1.8	2.37	2.24	3.36585	2.26	2.25	3.366	2.51233	2.23	3.39	3.5	3.33	3.052		4.78	3.96	3.33913	4.41	2.46	4.16	5.44	3.65	3.08	4.00669	4.46	5.085	3.13	4.52443	6.69	4.58	7.5
128	0.133	0.688	0.606333	0.335667	0.72	0.31	1.17	1.03	1.015	1.277	1.59	1.24	1.16533	1.54	1.88	2.95	2	2.17	3.14	2.69	1.58	3.01585	1.83	2.6	2.227	2.902	3.2	3.02	2.9	1.75	3.198	2.718	3.64	3.98	3.39348	5.18	3.16	5.16	4.17	4.14	4.18	3.55376	5.54	4.148	5.24	5.2475	6.18	8.84	7.3
Mean 10 ELWL	0.089	0.653	0.6562	1.03117	0.899	0.81625	1.54917	1.351	1.4205	1.41267	1.426	1.46	1.5743	1.892	1.802	2.324	2.1767	2.42875	2.46	2.409	2.324	2.66692	2.428	2.65	2.98133	2.90123	2.884	3.497	3.171	2.83	3.1589	3.11229	3.892	3.834	3.7063	3.701	4.037	3.728	4.37111	4.422	4.086	4.17945	4.591	4.6805	4.993	4.97465	5.503	6.94875	7.148
Ratio !0/rest	0.839036	1.00364	0.98435	1.31776	0.982514	0.797757	1.22205	0.971194	1.02424	1.01352	0.998283	1.00319	1.08338	0.991503	0.928069	1.08862	0.985593	1.08075	1.03392	0.992963	0.939577	1.07424	0.953359	1.00719	1.10179	1.01948	0.966357	1.17026	0.995887	0.879915	0.981705	0.95546	1.11835	1.077	1.03314	0.98092	1.05382	0.93209	1.0682	1.02223	0.968784	0.939255	0.997802	1.01058	1.06827	0.998054	0.994818	1.10138	1.08479
Overall advantage	1.022
[truncated: 68 more columns]

## Sheet: ELWLA 0-3h 2009+F-W plots
			New	New			New						New												New	New
CSDH	Yield/plant_S_Spain99	GrWt/plant/NFF_1994	Yield	dYield 2012	Yield/pl_droughted_Zaj06	Grain_wt/plant_rain_Kaz00adj	dYield 2011	Yield/pl_mn_Droughted_Zaj05	Diff_ear_dwt_SUSTExp2	moddrought_Yield/plant_T14_Krakow08	Yield/plant_sev_dr_Krakow10	Yield/pl_control_Zaj06	cYield 2013	Yield/pl_mn_Rainfed_Zaj05	GrainYd/plant_(Ht_adj)_N1_97	cont_Yield/plant_T35_Krakow08	Regr_adj_Yd/plant_Zaj02	Grain_yd/plant_irrig_Kaz00	Yield/plant_M_Spain99	Yield/plant_sev_drought_Krakow07	Yield/plant_rainfed_Zaj01	Grain_wt/plant/GH/1994	Yield/plant_irrig_Zaj01	GrainYield/plant_N2_97	cYield 2011	cYield 2012	GrainYd/plant_(Ht_adj)_N3_97	Yield/plant_cont_Krakow10	Yield/plant_mod_drought_Krakow07	Grain_yd/plant_A_Kaz98	Yield/plant_rain_Zaj00	Consel 2003(50pl/row)	Vern_Total_yield/pl_Krakow06	Yield/plant_control_Krakow07	Grain_wt/plant/Mor_1994	75ppb_Mn_Grain_wt/pl_03	GrainYd/plant_(Hr_adj)_N1_98	NFA_Mn_Grain_wt/pl_03	Non-vern_Total_yield/pl_Krakow06	GrainYd/plant_(Ht_adj)_N2_98	Conselice_Yield/plant_04	Yield_g/plant_adj(2,80)_Idice03	Grain_yd/plant_B_Kaz98	Yield/plant_irrig_Zaj00	GrainYield/plant_N3_98	Idice_Mn_Yield/plant_13%_04	Total_yield/plant_75ppb_05	Grain_yd/plant_A_Kaz99	Total_yield/plant_NFA_05
Mean	0.10375	0.652566	0.665461	0.810144	0.914526	1.00081	1.29895	1.38747	1.39001	1.39573	1.42819	1.45558	1.46676	1.90537	1.92421	2.1556	2.20612	2.26689	2.414	2.42426	2.45568	2.47	2.53432	2.63168	2.7365	2.85196	2.98116	3.04234	3.18269	3.19613	3.22173	3.25	3.52191	3.59	3.61	3.76682	3.86095	3.97202	4.081	4.34189	4.42	4.437	4.57978	4.64389	4.71242	4.96578	5.53	6.37733	6.64989
1	0.23	0.4505	0.521333	0.617	0.8	1.21	1.835	1.14	0.87	1.568	1.38	1.48	1.28067	1.63	2.15	2.74	1.796	3.05	4.03	3.51	1.96	1.96951	2.13	2.37	2.53367	3.38633	2.69	2.63	2.1	3.03	2.875	3.58	3.3	3.32	2.88696	3.73	1.93	3.71	4.16	3.81	3.7	4.3129	2.18	3.231	4.68	4.58993	3.81	8.23	5.83
2	0.272	0.7545	0.591	1.577	0.87	0.28	1.96833	1.38	1.091	1.552	2.38	1.58	1.97033	1.93	1.64	2.04	1.43	2.6	4.97	2.62	2.19	2.51829	2.39	2.47	1.62667	2.83067	2.92	3.29	2.68	4.48	3.482	3.0118	2.82	3.84	3.5413	3.33	2.85	2.62	3.9	4.02	4.86		2.92	4.965	4.8	4.87399	6.39	9.2	7.22
3	0.036	0.4005	0.727667	0.489333	0.92		1.10467	1.41	0.954	1.351	0.49	1.53	1.601	2.17	1.59	2.55	2.873	1.46	1.38	2.1	2.78	2.15122	2.75	2.72	3.99867	3.323	2.17	3.04	4.1	3.76	2.795	3.0752	3.37	3.3	3.35217	2.76	5.35	3.33	2.49	5.99	5.58	5.99969	4.86	5.222	4.54	5.12926	5.05	5.52	6.93
4	0.107	0.636	0.434	0.913667	0.81		1.59167	1.19	0.891	1.861	1.86	1.4	1.78067	1.84	1.93	2.14	1.865		2.5	3	2.01		2.28	2.26	3.74933	3.34567	2.54	2.86	3.19	3.37	3.154	3.9092	3.02	3.1	2.7413	2.73	3.08	2.24	2.12	3.36	2.7	3.65657	1.77	5.892	6.75	3.76945	4.49		3.76
5	0.06	0.696	0.718667	0.560333	0.98	0.82	1.40633	1.41	2.079	1.464	1.27	1.45	1.562	1.73	1.62	3.21	2.585	1.92	1.19	2.87	2.1	3.20488	2.29	2.53	2.56833	3.288	2.77	3.49	4.95	7.34	3.27	3.393	6.43	5.25	3.7413	4.48	2.9	5.18	7.46	3.17	4.16	3.9775	6.14	4.23	3.89	7.31431	7.83	3.84	8.12
7	0.121	0.841	0.804	0.456333	1.14		1.61433	1.55	1.93	1.582	1.36	1.63	1.67567	1.97	1.67	2.1	1.75		1.1	2.66	2.84		2.96	1.64	2.44467	2.23333	2.81	3.66	3.62	2.84	3.82	3.5108	2.22	2.91	4.57826	4.92	4.51	3.45	4.5	5.44	7.1	4.74423	3.4	4.548	3.75	5.64566	5.44		6.34
8		0.72	0.818333	0.629	1.09	0.59	1.857	1.45	1.635	1.745	0.9	1.65	1.38633	1.98	1.91	2.65	2.292		1.68	2.61	3.13	2.79512	3.08	2.48	3.53733	4.328	3.57	2.65	4.43	2.13	3.292	3.4404	4.17	3.71	3.42174	6.26	3.24	5.38	1.67	3.52	5.56	5.23404	9.22	4.41	4.54	5.8574	6.48	6.3	8.29
9	0.032	0.8725	0.835	0.454	1.06	0.46	1.143	1.7	1.686	1.535	1.7	1.76	1.704	2.46	1.83	2.3	2.351	3.64	2.61	2.22	3.93	1.87561	3.85	2.16	3.006	3.17767	2.64	2.27	2.35	1.18	2.96	4.0558	3.03	3.8	3.41957	4.73	4.78	5	5.74	4.92	4.52	4.70521	5.88	4.818	7.49	4.48623	6.75	6.26	6.2
10	0.015	0.9375	0.86	0.0413333	1.02	0.31	1.45133	1.51	1.709	1.349	1.64	1.63	1.694	2.35	2.72	2.52	2.839	1.6	1.69	1.46	2.93	3.62195	3.16	3.6	2.874	2.21533	4.27	1.42	3.8	5.16	4.269	4.7688	2.37	3.96	3.76087	4.6	4.84	4.14	5.73	5.23	5.72	4.46791	6.6	6.965	5.06	4.60256	6.9	5.07	7.71
11	0.135	0.5825	0.403	0.654333	0.85	0.72	1.28433	1.48	1.28	1.235	1.36	1.55	1.42767	2.04	1.77	2.76	1.469	1.13	1.99	2.81	2.86	1.7	2.81	2.74	3.124	2.71533	3.77	2.5	3.95	3.94	2.631	4.7336	2.27	4.75	3.55217	3.73	4.03	3.72	5.12	4.09	3.66	3.54706	5.07	4.685	5.34	3.77902	4.54	5.19	5.64
12	0.147	0.34			0.95	0.62		1.52	1.52	1.31	1.36	1.53		1.92	1.82	1.6	2.803	2.2	4.27	1.78	2.12	2.52927	2.35	2.14			2.82	2.9	4.12	3.36	3.582	1.99	3.37	4.39	5.17174	5.11	3.86	5.67	3.28	4.14	5.64	5.48299	6.35	4.825	4.85	7.60159	6.12	6.56	6.5
13	0.316	1.026	0.673333	0.989667	0.89	1.3	1.97733	1.31	1.15	1.783	2.03	1.34	1.82933	1.96	2.23	1.56	3.47	3.53	0.94	2.75	2.54	3.28415	2.51	2.81	2.4	3.29833	5.16	3.05	3.62	2.83	3.183	3.0824	4.18	5.2	4.32391	5.26	3.72	4.77	2.75	4.64	3.16	5.22546	3.91	4.822	4.41	5.88681	6.13	8.35	7.04
14	0.043	0.7785	0.932667	0.721667	0.82	0.24	1.60067	1.17	1.305	0.892	1.84	1.3	1.72167	1.68	1.47	1.48	2.296	1.67	2.64	2.32	1.88	2.37195	1.96	3.18	2.969	3.30567	2.85	2.11	2.25	3.3	2.44	3.946	1.96	2.96	2.73043	4.09	4.77	3.59	5.26	4.78	3.56	5.50026	6.42	4.052	4.22	6.08465	5.19	6.3	5.98
15	0.113	0.5495	1.02067	1.67433	1.2	0.26	1.64533	1.58	1.705	1.31	1.39	1.66	1.6	2.16	1.46	2.25	2.054	1.11	3.3	2.35	2.83	1.86098	2.86	2.41	2.63867	2.608	2.7	2.45	2.94	2.83	3.55	3.7138	3.26	3.13	4.13913	3.55	4.93	5.3		4.54	4.58	5.0598	6.24	4.972	4.63	5.05517	6.74	4.82	7.32
17	0.033	0.5015	0.617	0.76	0.97	0.72	1.18967	1.44	1.39	1.092	1.37	1.4	1.75467	1.91	1.96	1.18	1.838	2.37	1.87	2.17	2.56	2.69634	2.56	2.47	2.25533	2.31233	3.35	2.82	3.13	2.73	2.167	3.7696	3.64	3.89	3.72609	5.42	4.38	4.98	3.53	6.59	3.94	4.28652	6.18	3.085	7.28	5.31836	5.29	5.56	6.94
18	0.207	0.786	0.397	0.853667	1.24	2.98	1.41867	1.62	2	1.501	1.16	1.71	1.821	2.16	2.68	1.93	3.069	1.98	1.68	2.15	3.4	2.84268	3.75	4.05	3.69733	3.94467	4.33	3.37	4.13	4.49	3.648	4.4896	4.58	4.91	3.7	4.09	4.2	2.73	4.47	5.18	4.1	5.75226	3.21	5.281	5.29	4.75296	4.4	6.43	6.82
19	0.09		0.621	1.62767	0.86	1.5	1.76433	1.33	1.019	1.287	1.34	1.43	1.36733	1.84	2.15	2.21	1.989	2.35	2.95	1.86	2.02		2.29	2.9	3.24467	3.12233	2.11	3.14	3.51	3.76	3.881	3.4462	2.88	3.27		3.88	2.94	5.18	3.03	5.75	5.18	4.28518	4.6	5.48	3.38	5.36436	5.98	5.62	7.38
21	0	0.8675	0.822667	0.811	0.85	1.6	0.541667	1.4	1.83	1.653	1.53	1.53	1.46433	1.98	2.35	2.02	2.014	2.49	1.13	2.47	2.74	3.34146	2.8	3.01	2.053	2.99833	3.21	2.92	3.02	1.91	2.704	3.3638	5.48	2.49	4.38478	4.63	3.02	4.38	7.15	3.73	2.92	4.04284	5.46	4.223	3.85	5.21892	5.66	7.39	6.21
22	0.097	0.7875	1.04567	0.532667	1.17	1.29	1.37567	1.55	1.565		1.51	1.82	1.647	2.01	2.63	1.74	2.042	2.1	3.01	2.16	2.99	2.61829	2.93	3.07	3.88267	3.606	4.44	3.12	2.55	3.94	2.964	3.2696	3.04	4.09	3.80435	5.39	6.57	4.41	4.36	6.23	6.16	4.69	4.2	4.596	5.71	6.66022	6.02	7.11	7.01
24	0.211	0.482	1.35667	0.843	1.1	1.11	1.81167	1.59	1.529	1.837	1.57	1.72	2.081	2.25	1.7	1.78	2.652	3.33	2.63	3.35	3.4	2.52317	3.4	2.95	3.68367	4.16067	3.68	3.16	4.47	4.28	3.458	4.7666	2.89	5.29	4.55	3.65	5.26	2.73	5.46	4.31	4.46	4.63479	5.04	5.401	6.47	4.85885	6.86	10.76	6.78
25	0.061	0.786	1.041	1.54933	0.9		1.15267	1.44	1.08	1.687	1.27	1.47	1.86	1.93	1.59	2.23	3.231		2.03	2.12	1.57		1.93	1.91	3.77533	3.764	1.75	3.69	2.95	1.15	3.065		2.91	3.64	1.31304	2.98	2.6	3.31	2.06	3.99	4.62	4.90278	1.15	4.869	4.65	4.45915	5.87		6.06
26	0.177	0.934	0.661667	3.37167	0.85		2.27233	1.36		2.004	1.97	1.58	2.04067	2.03	1.61	1.99	1.431		5.49	3.05	2.04		2.07	2.24	2.864	3.90033	2.51	4.44	2.93	2.3	2.354	2.7438	3.32	2.98	4.88478	2.66	5.31	2.79	3.88	4.98	3.3	3.30443	1.8	3.395	7.12	5.89266	4.98		7.45
27	0.042		0.716	0.515667	1.03	0.52	1.126	1.39	0.989	1.387	1.57	1.26	1.06867	1.77	1.51	1.49	2.318	2.92	3.21	2.23	2.4	2.37927	2.54	2.03	2.42533	3.40533	2.45	2.62	3.61	2.92	2.621	2.8182	3.82	3.59	3.64565	4.03	3.99	3.89	3.42	3.53	3.62	3.48089	4.31	3.154	4.55	4.04054	5.62	7.38	6.27
28	0.24	0.688	0.786	1.24367	0.91	0.92	0.207667	1.43	1.211	0.616	1	1.42	1.765	1.82	1.63	1.34	2.005		5.51	2.29	2.55	1.87805	2.55	3.37	3.03133	1.53333	1.36	2.43	2.17	3.78	3.271	3.0662	2.73		5.84565	2.66	4.27	3.29	3.83	6.09	4.98	5.12523	4	5.305	6.11	6.10168	4.43	3.69	4.72
29	0.017	0.69	0.325	0.830333	0.97		1.10933	1.4	0.915	1.483	1.85	1.34	1.133	1.73	1.7	1.39	2.515		2.37	2.6	2.61		2.59	2.58	2.24	2.39033	3.96	2.13	3.48	3.94	3.256	3.369	3.29	4.17	3.73261	1.82	4.27	2.78		5.21	3.7	3.78851	3.68	4.751	6.48	3.74962	5.72		5.6
30	0.225	0.6095	0	0.508333	0.89	1.62	1.20033	1.41	1.809	1.377	1.6	1.31	1.05267	1.72	2.1	1.88	1.359	1.68	4.27	1.92	2.79	2.66341	2.74	2.52	1.794	2.60967	3	2.24	3.34	2.02	3.196	2.6772	2.79	3.08	2.92174		2.91		5.53	3.03	2.72	5.0432	5	3.563	6.17		5.33	6.33	7.79
31	0.034	0.592	0.358333	0.445	1.3		1.467	1.77	1.821	1.37	1.61	1.87	1.51733	2.42	1.83	2.11	2.475		1.95	2.78	3.27	2.46341	3.41	3.1	3.55433	2.58567	3.32	3.69	4.32	2.6	4.393	2.5646	4.53	4.7	2.94783	2.38	4.56	3.46	2.84	4.39	3.92	4.6969	2.32	5.68	5.22	5.03851	6.38		7.73
32	0.141	0.878	0.549667	0.728333	0.95	0.59	1.703	1.59	1.585	1.513	1.15	1.55	1.66667	2.09	1.97	1.97	5	1.86	3.12	2.93	2.4	1.84634	2.61	2.37	3.22033	2.66733	2.77	3.58	3.83	5.31	3.829	3.5294	4.92	2.94	4.5587	4.66	3.98	4.48	4.16	4.53	2.58	5.15443	4.82	4.963	4.27	5.16812	6.59	5.1	7.3
33	0.187	0.8945	0	0.333333	0.98	1.83	2.06167	1.61	1.445	1.493	1.91	1.67	1.502	2.36	2.55	2.55	1.976	4.04	3.31	2.86	2.46	2.77439	2.54	2.8	2.52367	3.07233	3.22	2.84	3.97	5.72	3.708	3.2324	1.89	4.16	4.15217	3.99	4.38	3.86	4.39	4.14	3.24	3.48416	5.57	4.323	3.97	5.42744	5.38	10.44	6.72
34	0.158	0.6125	0.559333	0.479667	0.84	0.67	0.642333	1.26	1.299	1.581	1.03	1.31	1.201	1.61	1.59	1.91	1.018	2.32	2.5	1.93	2.88	2.02195	2.89	1.9	2.69933	2.41033	2.58	2.67	2.38	1.84	2.355	2.7458	3.54	2.12	1.73913	2.28	2.72	2.94	5.31	3.57	3.24	3.75713	2.93	4.607	2.93	3.33536	4.97	4.13	4.7
35	0.028	0.5425	0	0.674	0.86	1.24	0.922	1.29		1.397	1.43	1.39	0.87	1.73	2.26	1.75	1.784	1.55	0.56	2.21	1.73	2.73902	1.93	1.85	2.078	2.055	2.31	3.52	2.77	3.1	2.469	3.3914	3.15	2.96	2.27391		3.06		4.52	3.37	4.84	4.89862	2.55	2.727	3.06	4.85257	4.99	5.68	5.46
36	0	0.587	0.297333	0.201	0.96	0.1	0.424667	1.34	1.345		1.26	1.51	0.871	1.72	2.04	1.9	1.792		1.11	2	3.01	1.20976	2.97	2.91	2.88633	2.598	2.98	2.52	2.58	3.48	2.374	3.428	3.39	2.79	3.80652	2.05	5.57	2.33	2.45	4.55	3.48	3.48354	4.94	3.803	4.46	3.83419	4.43	6.75	6.33
38	0.061	0.566	0.152667	0.399333	0.72	0.93	0.959667	1.06	1.33	1.4	1.36	1.24	1.25633	1.52	1.17	0.88	2.201	2.05	1.73	1.39	1.55	1.54634	1.49	1.66	1.992	2.447	2.13	2.6	1.58	4.88	1.843	3.0526	2.01	1.62	2.85435	1.59	2.51	1.08	2.94	1.86	4.68	3.2946	4.3	3.728	2.15	2.61553	1.74	4.49	3.96
39	0.093	0.693	1.36333	0.649333	0.84	0.86	1.37133	1.39	1.375	1.702	1.62	1.5	1.59567	1.84	2.31	1.47	1.412	2.41	2.91	2.76	2.18	3.05488	2.32	4.09	2.35867	2.867	2.87	3.32	3.27	3.09	3.88	2.7348	4.75	2.68	3.30652	5.62	3.73	4.69	3.71	4.03	4.42	3.95446	4.74	4.025	3.24	6.20766	6.04	6.22	7.87
40	0.143	0.47	0.662	0.478667	0.72	0.3	1.412	1.02	1.09	1.19	1.75	1.14	1.18567	1.41	1.89	1.34	1.51	1.01	1.82	2.16	1.59	2.67317	1.53	2.46	2.23	2.02567	3.4	2.41	3.27	2.46	1.8	2.7388	2.76	2.5	4.07826	2.44	2.39	2.52	2.68	2.58	2.92	3.95261	3.58	3.513	2.82	3.6314	3.55	3.54	5.26
41	0.069	0.325	0.602	0.0983333	0.86	0.12	1.39033	1.43	1.215	1.177	1.2	1.37	1.457	1.89	1.35	1.15	1.764	3.17	3.8	1.25	2.73		3.05	1.17	2.824	1.63033	1.6	2.68	2.47	4.24	2.73	2.5958	1.26	1.75	2.83043	0.99	5.2	1.33	0.56	7.02	4.06	2.5103	3.08	4.468	5.64	3.67989	4.96	3.86	3.6
42	0.008	0.335	0.847667	0	0.81		1.26567	1.17	0.901	1.349	0.85	1.27	1.73133	1.63	0.91		2.2		0.66	1.45	1.85		1.94	1.4	2.01833	2.25533	1.87	2.57		4.96	1.811	2.1464	3.01	3.51	3.39783	2.49	3.85	1.66	0.23	4.35	3.4	1.98437	1.15	3.418	3.04	3.16852	2.4		3.42
45	0.1	0.7105	0.593	1.04967	0.82		1.65567	1.26	1.6	1.368	0.93	1.51	1.52833	1.8	1.77		1.139		2.79	2.19	1.76		1.92	2.44	2.57833	2.931	2.89	2.26	2.89	4.96	3.541	3.8778	5.2	3.48	4.55435	2.52	2.82	4.32	2.78	4.24	2.32	3.18281	3.92	4.636	3.16	5.49529	5.45		7.03
46	0.113	0.9125	0.806667	0.747667	0.89	0.53	1.64967	1.42	1.68	1.325	1.19	1.36	1.46667	1.8	2.62	2.45	1.567	2.51	2.13	3.13	1.69	3.45976	1.74	3.28	2.393	3.49967	3.56	2.93	3.88	1.68	3.526	2.6952	4.62	3.61	3.6587	6.05	3.26	5.42	4.8	4.07	5.12	3.94689	8.07	4.547	4.52	5.60503	6.76	8.15	8.59
47	0.319	0.7645	0.728333	0.522333	0.81	1.12	1.185	1.28	1.606	0.835	1.22	1.26	1.41167	1.71	1.54	1.52	2.166	1.73	3.01	1.37	2.32		2.4	2.19	2.44833	2.52067	2.38	2.99	1.98	4.96	2.511	4.5988	1.59	1.93	2.73913	1.41	4.46	1.43	2.87	5.64		4.81501	2.49	3.371	4.92	3.9696	3.24	4.26	4.6
48	0.012	0.45	0.972333	0.592	0.85	0.63	1.392	1.46	1.709	1.203	1.3	1.63	1.49433	2.21	2.15	2.57	3.376	1.51	1.34	2.69	2.41	3.27439	2.66	2.99	3.42133	2.77267	3.18	3.55	4.27		3.979	3.4534	4.43	4.14	4.13478	5.07	5.32	3.23	6.08	5.19	5.02	5.83075	4.28	5.791	5.84	5.26098	6.86	8.82	7.33
49	0.064	0.4	1.122	0.380333	0.8	0.94	1.21567	1.15	1.049	0.622	1.08	1.42	1.64933	1.6	1.17	1.68	2.42	4.26	1.86	0.75	1.69	1.93415	1.64	1.69	2.63833	1.51867	1.93	2.7	1.65	5.22	1.969	3.2958	1.51	1.38	1.70652	1.76	4.02	2.39	1.98	3.13	3.6	3.00819	6.78	3.44	5.45	2.56613	3.02	7.27	4.46
50	0.062	0.4545	0.941667	0.409333	0.94	0.47	0.755	1.48	1.09	0.928	1.18	1.48	1.123	1.9	1.36	2.5	2.156	2.3	1.95	2.45	2.7	2.7	2.87	1.61	1.93	2.438	2.23	2.44	3.28	3.48	2.419	3.1034	3.57	3.23	4.41304	1.72	4.63	3.7	3.51	5.95	3.7	4.11155	6.49	3.292	4.74	4.82998	9.57	7.22	5.79
51	0.044	0.6965	1.34933	0.411	0.88	0.31	1.932	1.47	1.519	1.325	1.19	1.58	1.703	2.1	2.52	2.22	2.027	3.32	1.43	2.58	2.18	3.41585	2.24	3.19	2.47633	2.94933	3.53	3.95	3.54	3.1	2.656	2.7754	4.34	4.51	5.31522	3.87	3.61	5.12	4.62	4.09	4.96	3.79341	5.17	3.336	5.28	5.25232	5.89	7.78	9
53	0.05	0.444	0.419667	1.39767	0.85	1.05	1.60633	1.42	1.56		1.01	1.4	1.47733	1.94	1.83	2.82	3.13	1.95	2.05	2.82	2.53	3.15122	2.81	3.07	2.427	2.68733	2.58	3.96	3.75	3.56	2.871	3.4882	4.61	4.74	3.98696	5.21	4.04	5.4	6.38	5.58	4.74	5.3819	4.17	5.283	5.02	4.49863	6.45	3.88	9.17
54	0.193	0.861	0.738333	0.204	1.06	0.74	1.86233	1.61	1.819	1.522	1.23	1.62	1.63433	2.19	2.01	1.72	2.923	2.99	1.06	2.39	2.98		3.21	3.42	2.79933	2.89167	3.08	3.01	3.71	2.9	3.837	3.4456	3.12	4.73	3.29565	2.52	4.32	3.24	5.02	4.93	4.3	4.30286	3.35	5.501	5.12	6.3555	5.92	6.15	8.04
55	0.063	0.6665	0.61	0.486667	0.75		1.50567	1.27	1.525	1.385	1.26	1.44	0.968	1.83	1.99	1.25	1.608		2.95	1.98	2.16		2.15	2.83	3.111	2.44333	2.94	1.96	3.59	3.11	2.873	2.9238	2.88	3.37	3.31739	3.02	3.42	3.93	1.58	4.66	3.64	2.91278	2.65	4.553	4.3	5.58329	3.99		6.07
57	0.152	0.3965	1.523	0.974	0.9	1.34	1.33633	1.39	1.014	1.074	1.87	1.45	1.65433	1.94	2.04	1.45	2.371	1.86	0.94	1.95	2.84	2.71341	3.03	2.24	2.28167	2.81333	1.91	2.84	3.89	2.97	3.129	3.7096	2.56	4.66	4.27391	4.65	3.51	4.69	4.61	3.3	4.32	4.48291	8.36	5.261	4.56	5.98191	7.17	5.97	7.95
58	0.253	0.809	0.655333	1.345	0.97	1.52	2.061	1.53	1.42	1.837	1.64	1.67	1.55733	2.22	2.16	2.89	2.756	3.47	3.99	2.97	2.73	2.40732	2.83	3.3	2.397	2.41967	3.51	3.71	3.82	2.95	4.338	3.6502	4.92	4.08	4.12609	4.66	4.61	5.69	3.72	4.11	6.58	4.29138	7.31	5.605	4.91	6.66661	7.34	9.9	8.81
59	0	0.3365	0.860333	0.756	0.64	0.48	0.599	0.93		1.472	1.21	0.95	1.46733	1.17	1.47	1.94	1.398	1.65	3.22	2.78	1.14		1.36	1.79	1.78933	2.55067	2.52	2.5	2.53	3.83	3.346	2.7812	1.9	2.89	2.82826		2.37		3.75	2.18	5.72	3.23484	3.83	4.975	2.64	5.50334	4.72	6.96	4.87
61	0.135	0.709	0.333667	1.02833	0.72	1.26	1.04	1.26	0.99	0.935	1.62	1.4	1.026	1.81	1.79	1.66	1.287	2.48	2.38	1.84	2.99	2.45976	2.99	3.24	1.54333	3.15767	3.01	2.81	2.51	3.29		2.1888	6.07	2.69	3.65652	4.04	3.12	3.39	3.78	3.8	5.02	5.20903	4.7		5.23	4.75809	6.06	6.1	6.28
63		0.68	0.569667	1.29767	0.83	0.22	0.796333	1.35		1.345	1.56	1.45	2.07533	2.08	1.77	2.88	3.75	1.87	1.31	1.91	2.41	2.98659	2.75	2.7	2.559	2.74233	3.37	2.58	4.01	2.38	1.853	3.506	2.93	4.21	2.63478	4.22	3.3	4.09	4.48	3.64	4.36	4.65117	2.62	3.532	3.85	5.72352	5.97	5.08	6.96
64	0.115	0.7015	0.921333	1.07867	0.95	1.34	1.30733	1.37	0.985	1.658	1.61	1.33	1.51667	1.95	2.17	3.06	1.851	2.13	1.7	2.6	2.71	2.59756	2.73	2.86	3.31733	3.08867	3.25	2.71	2.4	2.09	3.508	3.7104	2.94	2.29	4.33478	4.52	4.28	3.72	4.24	4.15	4.78	4.49007	5.28	5.609	4.95	5.932	4.17	6.74	6.15
65	0.083	1.0225	0.817333	1.838	1.06	1.77	0.793667	1.58	1.475	1.379	1.98	1.41	1.50133	1.98	1.76	2.97	3.418	1.77	2.12	1.62	2.08	$0	2.18	2.91	1.92767	2.77267	3.73	3.32	3.74	4.05	4.003	2.9952	4.75	3.83	4.13261	4	3.54	5.61	4.51	4.89	3.86	4.39131	3.71	4.4	4.97	4.53938	6.21		7.25
66	0.077	0.6465	0.324333	0.66	0.91	2.23	1.76567	1.39		1.275	1.6	1.25	1.53067	1.96	2.39	2.7	2.766	2.41	1.74	2.03	3.17	2.51951	3.14	3.3	3.68667	4.413	3.3	3.68	3.31	4.68	4.064	2.2626	2.3	3.74	4.46087		3.82	5.55	3.24	5.22	4.7	3.47578	6.26	5	5.94	6.59862	6.48	6.32	8.99
67	0.348	0.775	0.506667	0.648	0.71	0.99	1.72967	1.24	1.075	1.405	1.07	1.36	1.529	1.66	2.11	2.76	1.448	2.17	3.43	2.81	2.37	2.81463	2.4	2.17	2.719	2.68	2.43	3.35	3.15	2.48	3.518	3.1558	4.38	3.18	3.36304	4.6	3.13	5.21	3.75	3.69	4.02	3.85249	2.95	4.442	4.6	4.15485	5.97	4.69	7.36
69	0.054	0.743	0.723333	1.96967	0.99		1.84367	1.54	1.219	1.321	0.96	1.44	1.59233	2.03	2	1.64	3.569		1.58	2.86	2.66	0	2.62	3.29	3.54	3.10167	2.46	2.6	2.72	3.34	3.028	3.4966	2.82	3.85	4.0587	3.7	3.9	4.9	3.08	5.43	4.08	5.66044	1.6	3.811	5.7	5.11739	3.21		7
70	0.221	0.5635	0.662667	0.933	0.83	0.68	1.28667	1.29	1.095	2.058	2.06	1.12	1.34933	1.64	2.16	2.12	2.228	2.47	1.85	2.57	1.79	2.38902	2.03	3.18	1.892	2.70367	3.15	3.25	2.45	2.41	3.74	3.629	3.45	3.02	2.51522	4.65	1.89	5.27	3.69	2.3	3.3	3.62998	5.98	4.877	3.52	4.17901	3.9	4.79	6.24
71	0.102	0.9655	0.681667	1.70733	0.81	0.34	1.69767	1.31	1.58	1.997	1.22	1.5	1.985	1.85	2.06	2.94	1.857	2.05	2.96	1.93	2.19	2.66098	2.27	2.19	2.54033	3.284	4	4.11	4.27	2.87	3.537	2.8766	5.17	4.81	5.94783	4.84	2.82	4.33		4.39	3.54	5.08724	5.8	4.357	4.02	5.66927	5.67	9.25	7.05
72	0.095	0.452	0.414667	0.792333	0.74	1.22	1.09733	1.12	1.386	1.727	1.37	1.03	1.27867	1.43	1.69	2.38	1.82	1.43	1.79	1.79	2.1	1.9	2.08	1.98	2.105	2.768	2.35	3.16	1.98	1.48	2.53	3.7254	4.67	2.43	3.41522	4.34	2.33	4.35	5.88	2.24	4.34	3.96407	3.8	3.889	2.23	3.08222	4.24	6.17	6.23
80	0.143	0.5805	0.473667	0.45	0.89		1.02567	1.34	1.446	1.063	1.5	1.47	1.232	1.84	1.63	2.27	2.28		0.92	2.45	2.32	1.89024	2.26	2.95	2.92167	2.74567	2.29	3.45	2.05		3.129	2.308	2.79	3.18	3.12174	2.98	4.4	2.99	3.23	4.03	3.26			5.483	4.46	2.97533	4.21		5.56
86	0.11	0.5515	0.272667	0.771667	1.23	1.5	1.04133	1.54	1.46	1.431	0.86	1.66	1.44933	2.03	1.76	2.59	1.723	2.14	2.23	2.37	2.85	2.26951	2.81	2.93	2.76333	3.20733	3.21	2.38	2.07	2.5	2.36	2.5196	2.4	3.87	2.76304	3.41	3.04	4.19	3.95	3.3	4.54	4.46722	2.93	3.706	3.4	5.16634	4.43	5.93	6.16
87	0.075	0.659	0.927333	0.82	1.06	0.52	1.245	1.55	1.7	1.588	1.5	1.77	0.948	2.28	1.76	2.18	2.887	1.61	2.6	2.82	3.06	1.91707	2.8	3.29	3.62167	3.01867	3.06	3.16	2.98	1.27	4.53	3.7874	1.74	3.28	4.75652	3.13	3.45	3.95	7.31	3.5	4	4.37787	5.67	5.368	4.16	4.82717	5.23	6.23	7.1
88	0.055	0.368	0.645333	0.776	1	2.42	0.524667	1.49	1.59	1.29	1.39	1.49	1.37867	1.99	2.29	2.14	2.105	2.08	1.42	2.59	2.87	3.32073	2.88	2.94	2.43867	2.36667	2.51	3.38	3.12	1.26	3.238	2.5024	3.8	3.52	3.41522	3.63	3.27	5.41	6.41	3.88	4.78	4.84951	3.71	4.849	4.76	6.72609	6.74	7.14	6.64
90	0.284	1	0.969	0.107667	1.02	0.73	1.80433	1.6	2.42	1.104	1.33	1.76	1.95133	2.29	2.59	2.48	2.99	4.29	2.56	2.46	2.82	3.45366	2.89	3.23	2.80267	3.63567	4.32	3.81	4.19	1.71	5.356	3.9534	2.51	3.6	4.3087	3.87	4.56	4.8	4.91	4.66	4.48	5.74298	5.93	5.733	5	6.02485	7.95	8.47	11.03
91	0.072	0.612	0.822667	0.123667	1.03	0.25	1.18167	1.62	1.7	1.189	1.65	1.57	1.58367	2.17	2.2	1.67	2.639	3.89	1.69	2.07	3.72	1.51829	3.99	2.64	2.79033	2.77133	3.45	3.46	3.11	3.19	4.685	4.1784	5.84	4.17	2.11739		4.62		6.93	4.5	3.84	5.10172	4.31	5.134	4.57	3.9102	7.49	6.06	7.9
92	0.03	0.4645	0.325	0.217667	0.88	1.76	0.803333	1.35	1.399	1.584	1.67	1.23	0.857667	1.72	1.83	1.27	1.418	1.95	2.11	2.92	2.46	1.83415	2.4	2.38	2.10333	2.483	3.48	1.99	2.82	2.55	3.082	3.1038	3.84	3.34	2.1413	3.31	3.93	2.84	4.69	3.22	4.46	3.66045	1.56	5.156	5.2	4.88765	6.05	6.63	5.98
93	0.071	0.4825	0.634667	0.529333	1.16	0.65	1.402	1.62	1.26	1.377	1.49	1.76	1.21567	2.36	2.4	2.08	3.015	2.35	2	2.31	2.93	3.73415	2.85	2.87	2.15867	3.59233	3.71	2.22	3.53	3.33	4.643	3.5184	4.22	3.54	4.0087	3.9	2.99	4.71	4.9	3.31	3.84	4.03763	4.52	5.608	4.91	4.67829	5.94	9.02	6.72
94	0.033	0.6235	0.106667	0.0823333	0.76	0.45	0.386667	1.28	1.109	0.995	0.66	1.34	0.899667	1.78	1.69	1.71	0.731	1.02	3.42	1.76	2.17	2.58293	2.28	2.17	2.14333	2.64467	1.64	2.81	2.61	1.59	3.359	2.4722	3.55	3.53	3.48696	2.52	3.21	3.5	4.79	3.1	4.92	3.14145	5.27	4.409	5.09	5.72642	3.07	7.01	5.01
96	0.12	0.794			0.82	3.14		1.2		1.492	1.74	1.41	*	1.88	2.18	2.89	2.055	3.18	4.58	2.46	1.91	2.58537	2.01	2.65			4.23	2.45	2	2.14		2.9606	4.06	3.79	4.23478		4.03		5.93	3.58	4.68	4.85012	3.47	4.657	4.02	4.60331	5.67	8.13	6.96
97	0.021	0.7675	0.482333	0.369333	0.69	1.28	1.60967	1	1.365	1.413	1.13	1.38	1.30033	1.65	2.12	2.67	1.207	1.99	1.87	2.65	1.93	2.9	2	2.6	2.41767	3.24533	2.3	3.74	3.12	3.19	2.444	2.8756	3.36	3.99	1.49565	4.77	3.65	5.34	4.92	3.44	2.82	3.55923	8.2	3.797	3.85	6.2858	6.59	2.9	6.67
98	0.411	1.0495	0.609333	2.35733	0.79		1.95433	1.18		1.456	1.47	1.48	2.134	1.9	1.3	2.91	2.014		3.22	2.99	1.86		1.98	1.5	2.89967	2.93367	2.3	4.24	3.85	2.55	3.086	2.5708	3.31	4.6	3.6413	3.24	2.88	3.57	1.21	4.2	2.9	5.09316	$0.55	4.577	4.97	5.49017	6.95		6.5
99	0.013	0.516	0.493	0.440333	0.8	0.49	1.18633	1.18	1.535	1.232	1.42	1.41	1.36833	1.75	1.69	2.71	1.526	0.81	1.8	2.37	2.24	3.36585	2.26	2.25	3.366	2.51233	2.23	3.39	3.5	3.33	3.052		4.78	3.96	3.33913	4.41	2.46	4.16	5.44	3.65	3.08	4.00669	4.46	5.085	3.13	4.52443	6.69	4.58	7.5
102	0.1	0.9335	0.259667	0.834667	0.95		1.34567	1.46	1.521	1.244	1.24	1.67	1.527	2.23	2.16	3.15	2.836		3.26	2.18	2.15		2.24	3.24	3.128	2.08967	3.04	4.04	4.03	3.33	4.038	3.439	2.51	3.57	4.62174	3.18	4.77	4.24	2.94	4.02	6.42	4.96993	2.39	5.78	5.41	5.66941	5.07		7.62
104	0.057		0.747	0.381	1.02		0.55	1.61	0.971	0.798	1.71	1.52	1.67267	2.07	2.44	2.42	2.6	1.16	3.15	2.97	3.44	1.85122	3.54	2.93	2.824	2.499	2.77	2.59	3.09	1.15	3.954	1.9632	4.53	3.67	3.12391	4.22	4.37	3.55	5.28	4.6	3.42	4.51962	2.44	5.58	5.34	4.7231	6.38	2.8	8.8
105	0.007	0.545	0.684	0.896333	0.77		1.51633	1.07	1.339	1.394	1.59	1.06	1.23433	1.55	1.92	2.19	1.957	1.43	2.04	1.56	2.27	1.66707	2.2	3.12	2.99	2.51933	3.75	3.97	2.86	3.54	3.011	3.2616	2.98	1.87	2.92826	3.44	3.74	4.02	4.59	4.48	3.96	5.1125	4.11	4.87	5.98	4.41911	5.61	7.63	7.09
114	0.176	1.024	0.239667	0.455	1.07		0.737	1.56	1.56		1.82	1.5	0.718	2.03	2.16	2.37	2.122		2.62	2.72	3.32		3.34	2.63	2.95867	3.19333	3.12	3.39	3.92	4.63	3.402	3.6192	2.48	3.92	4.41087	4.31	5.76	4.01	3.52	7.85	4.64	5.54505	1.82	5.411	4.08	4.41642	6.22		6.5
115	0.018	0.567		2.68533	1		0.664	1.55	1.066	1.962	1.79	1.69	*	2.3	1.12		2.505		2.09	3.19	2.51		2.48	1.28	3.75167	2.697	1.74	3.71	3.79	3.54	2.917	2.681	3.31	3.95	2.39348	3.99	3.09	3.38		3.26	4.62	4.12311	1.85	6.6	3.94	3.19069	4.86		5.53
124	0.01	0.729	0.737	0.735	0.81	0.95	0.861333	1.17	1.275	1.663	1.36	1.15	0.87	1.72	1.64	3.25	2.281	3.18	0.61	3.53	2.33	1.9378	2.31	3.09	3.24733	3.277	3.4	2.66	3.26	2.88	3.415	1.942	4.13	4.49	2.66522	2.32	4.98	3.39	5.93	4.24	3.3	4.44024	3.7	6.335	5.04	3.30927	5.46	2.57	5.45
127	0.102	0.4165	0.763	0.447333	0.86	1.14	1.60467	1.42	1.325		1.34	1.29	0.856667	1.76	1.71	2.15	3.29	2.29	1.48	2.72	2.31	1.98171	2.31	2.86	1.68733	2.71533	2.39	2.19	2.63	1.44	3.338	2.781	4.42	4.28	2.7413	3.64	2.57	3.94	3.5	2.26	4.62	4.5431	4.17	4.605	5.82	4.25953	3.79	7.11	4.91
128	0.133	0.688	0.606333	0.335667	0.72	0.31	1.17	1.03	1.015	1.277	1.59	1.24	1.16533	1.54	1.88	2.95	2	2.17	3.14	2.69	1.58	3.01585	1.83	2.6	2.227	2.902	3.2	3.02	2.9	1.75	3.198	2.718	3.64	3.98	3.39348	5.18	3.16	5.16	4.17	4.14	4.18	3.55376	5.54	4.148	5.24	5.2475	6.18	8.84	7.3
143	0.053	0.456	1.08133	1.65333	0.84		1.80533	1.37	1.2	1.332	1.77	1.53	1.86133	1.91	1.77	3.61	2.246		1.36	3.62	1.67		1.75	2.62	3.44867	1.587	2.43	4.05	4.91	2.45	3.288	3.9504	4.66	4.83	3.86957	4.56	5.96	6.33	3.18	6.33	3.44	5.37124	2.05	4.487	5.69	5.58945	4.97		6.65
144	0.073	0.4265	0.588333	0	0.81	0.2	0.137	1.2	1.45	1.04	0.47	1.37	1.30833	1.65	1.51	1.33	2.357	1.31	1.03	1.31	2.17		2.13	1.66	2.942	1.65533	1.47	2.94	2.29	3.2	1.77	2.5386	1.17		2.75652	1.74	3.31	1.3	$0.6	4.52	3.44	4.13712		3.09	2.7	4.37752	2.95		4.88
146	0.053	0.678	0.748333	1.05733	0.98		0.996333	1.56	1.829	1.719	1.27	1.51	1.772	2.05	1.6	3.09			7.97	2.54	2.18		2.26	2.11	2.83133	2.58733	2.4	4.05	2.97	3.14	3.666	4.2024	3.39	3.92	5.11739	3.92	5.13	3.61	2.18	8.65	4.46	5.04423	1.8	4.831	7.48	5.94315	5.33		6.67
Mean	0.10761	0.658086	0.661893	0.798378	0.9125	0.948125	1.30409	1.38286	1.39583	1.39585	1.41655	1.45976	1.46872	1.91	1.89488	2.17667	2.23233	2.26125	2.41262	2.38583	2.44631	2.48198	2.52452	2.60381	2.7291	2.83467	2.91202	3.0269	3.21386	3.16951	3.20509	3.23588	3.45833	3.59024	3.58478	3.71821	3.83702	3.92772	4.08797	4.33571	4.21766	4.37044	4.30914	4.63617	4.72048	4.96803	5.49452	6.34877	6.62631
Mean 2009	ELWLA 0-3h
16	0.088	0.33			0.93	0.84		1.33	1.215	1.684	1.7	1.18		1.72	1.92	2.39	1.997	2.37	1.41	2.71	2.86	1.83293	2.83	2.38			3.12	3.97	2.18	2.63	2.243	3.335	4.56	3.22	4.11304	5.23	1.87	5.52	3.55	2.81	2.22	3.48927	6.29	3.844	3.38	3.59811	6.01	3.99	8.17
20	0.124	0.6275	0.980667	1.48067	1.01	0.47	1.31267	1.58	1.077	1.155	1.93	1.56	1.81767	2.11	2.62	2.28	2.569	2.2	3.09	3.59	2.91	3.25	2.97	3.53	2.53233	2.31833	3.77	3.48	3.26	2.24	3.8	4.6176	4.97		3.98913	4.47	3.83	5.03		5.49	3.86	5.44696	2.62	4.676	6.52	5.9214	5.46	6.11	7.68
23			1.01933	1.28133	0.95	1.13	1.465	1.53	1.56	1.828	1.37	1.53	1.59433	1.96	2.18	2.96	2.988	2.21	1.56	2.24	2.97	3.58293	3.24	3.89	3.50733	3.069	3.64	2.21	2.51	2.66	3.31	3.6556		2.44	3.31739	4.09	4.98	4.42	4.62	4.59	4.6	6.39327	7.94	3.81	6.86	4.17462	6.95	8.93	7.26
37	0.136	0.696	0.701333	0.566667	0.88	1.44	0.505	1.3	1.45	1.346	1.31	1.37	0.854667	1.71	1.84	1.76	1.508	1.94	0.93	2.09	2.66	1.4622	2.57	2.5	2.51467	2.81167	3.59	2.33	2.19	5.22	2.61	3.3076	3.36	2.5	2.64565	3.28	3.56	4.55	4.43	3.83	3.86	4.72012	10.84	4.409	4.34	4.59078	5.79	5.45	5.71
43	0.009	0.428	0.559667	0.951	0.85	1.32	1.70667	1.31		1.032	1.52	1.23	1.38867	1.65	1.77	1.26	2.154	3.07	2.59	2.71	2.01	2.14634	2.05	3.08	4.07967	3.64167	2.74	3.94	2.28	1.68	2.87	3.1676	5.3	4.77	3.22609	3.53	5.4	2.63	5.39	4.88	5.42	3.96248	6.41	4.307	4.66	4.02183	5.57	8.88	6.63
44	0.018	0.419			0.92	1.28		1.38	1.319	1.891	1.35	1.29	*	1.7	2.21	0.75	1.849	2.48	1.2	3.22	2.92	2.36585	3	2.72			3.57	3.59	3.89	4.24	3.074	3.6634	3.18	4.85	2.64783	3.87	5.26	3.3	7.13	4.1	5.4	5.56551	5.66	4.564	4.13	6.21697	4.15	5.47	5.62
52	0.068	0.7405	0.915667	0.914	0.93	2.46	1.271	1.5	1.575	1.462	1.68	1.42	1.67933	1.87	1.99	1.85	1.65	2.56	2.73	2.36	2.09	2.90732	2.09	3.01	2.42767	3.39333	3.1	2.8	3.34	2.02	3.934	3.3846	4.22	4.23	3.61739	4.52	3.44	4.03	4.16	4.08	4.7	4.68847	6.53	4.92	4.48	5.65324	6.89	6.17	7.11
56	0.134	0.926	0.718333	0.697667	0.77	1.12	1.019	1.32	1.35	0.846	1.28	1.55	1.613	1.94	2.99	2.24	1.282	2.01	2.84	3.31	2.22	3.44024	2.31	2.87	2.43467	3.489	4.49	3.29	3.86	3.86	3.536	3.0094	3.35	4.38	5.11304	4.66	4.2	5.06	4.41	5.44	4.1	5.63866	7.2	5.311	4.69	6.49488	7	9.52	7.9
60	0.062	0.3985	0.717667	0.716333	0.94	2.13	1.71933	1.45	0.905	1.537	1.68	1.48	1.60567	2.04	2.63	2.28	1.998	1.75	3.83	2.6	2.48	2.70366	2.5	2.22	2.097	2.134	3.63	2.85	3.12	3.6	3.664	2.8068	5.28	2.72	5.06087		2.77		4.41	2.99	4.14	3.65329	6.04	4.628	2.54	5.12152	5.61	4.01	6.07
62	0.019	0.71	0	0.838333	1.02	1.19	0.971667	1.5	1.611	1.167	1.44	1.62	1.02167	2.07	1.8	2.08	1.796	2.44	1.62	2.64	2.4	2.64878	2.59	2.59	2.90567	3.37633	3.27	3.26	2.61	3.98	3.588	2.0826	3.05	3.18	3.55217	3.86	4.54	4.42	1.56	5.18	4.94	4.73979	10.03	5.947	4.42	5.30714	4.72	7.1	6.22
Mean 10 ELWL	0.0731111	0.586167	0.701583	0.93075	0.92	1.338	1.24629	1.42	1.34022	1.3948	1.526	1.423	1.44687	1.877	2.195	1.985	1.9791	2.303	2.18	2.747	2.552	2.63402	2.615	2.879	2.81238	3.02917	3.492	3.172	2.924	3.213	3.2629	3.30302	4.14111	3.58778	3.72826	4.16778	3.985	4.32889	4.40667	4.339	4.324	4.82978	6.956	4.6416	4.602	5.11005	5.815	6.563	6.837
Ratio !0/rest	0.67941	0.890714	1.05996	1.1658	1.00822	1.41121	0.95568	1.02686	0.960161	0.999249	1.07727	0.974817	0.985126	0.982723	1.15838	0.911945	0.886564	1.01846	0.903582	1.15138	1.0432	1.06126	1.03584	1.10569	1.03051	1.06861	1.19917	1.04794	0.909811	1.01372	1.01804	1.02075	1.19743	0.999313	1.04002	1.12091	1.03857	1.10214	1.07796	1.00076	1.02521	1.1051	1.61424	1.00117	0.974902	1.02859	1.05833	1.03374	1.0318
Overall advantage	1.046
[truncated: 68 more columns]

## Sheet: Leaf FW 7-9+F-W plots
			New	New			New						New												New	New
CSDH	Yield/plant_S_Spain99	GrWt/plant/NFF_1994	Yield	dYield 2012	Yield/pl_droughted_Zaj06	Grain_wt/plant_rain_Kaz00adj	dYield 2011	Yield/pl_mn_Droughted_Zaj05	Diff_ear_dwt_SUSTExp2	moddrought_Yield/plant_T14_Krakow08	Yield/plant_sev_dr_Krakow10	Yield/pl_control_Zaj06	cYield 2013	Yield/pl_mn_Rainfed_Zaj05	GrainYd/plant_(Ht_adj)_N1_97	cont_Yield/plant_T35_Krakow08	Regr_adj_Yd/plant_Zaj02	Grain_yd/plant_irrig_Kaz00	Yield/plant_M_Spain99	Yield/plant_sev_drought_Krakow07	Yield/plant_rainfed_Zaj01	Grain_wt/plant/GH/1994	Yield/plant_irrig_Zaj01	GrainYield/plant_N2_97	cYield 2011	cYield 2012	GrainYd/plant_(Ht_adj)_N3_97	Yield/plant_cont_Krakow10	Yield/plant_mod_drought_Krakow07	Grain_yd/plant_A_Kaz98	Yield/plant_rain_Zaj00	Consel 2003(50pl/row)	Vern_Total_yield/pl_Krakow06	Yield/plant_control_Krakow07	Grain_wt/plant/Mor_1994	75ppb_Mn_Grain_wt/pl_03	GrainYd/plant_(Hr_adj)_N1_98	NFA_Mn_Grain_wt/pl_03	Non-vern_Total_yield/pl_Krakow06	GrainYd/plant_(Ht_adj)_N2_98	Conselice_Yield/plant_04	Yield_g/plant_adj(2,80)_Idice03	Grain_yd/plant_B_Kaz98	Yield/plant_irrig_Zaj00	GrainYield/plant_N3_98	Idice_Mn_Yield/plant_13%_04	Total_yield/plant_75ppb_05	Grain_yd/plant_A_Kaz99	Total_yield/plant_NFA_05
Mean	0.10375	0.652566	0.665461	0.810144	0.914526	1.00081	1.29895	1.38747	1.39001	1.39573	1.42819	1.45558	1.46676	1.90537	1.92421	2.1556	2.20612	2.26689	2.414	2.42426	2.45568	2.47	2.53432	2.63168	2.7365	2.85196	2.98116	3.04234	3.18269	3.19613	3.22173	3.25	3.52191	3.59	3.61	3.76682	3.86095	3.97202	4.081	4.34189	4.42	4.437	4.57978	4.64389	4.71242	4.96578	5.53	6.37733	6.64989
1	0.23	0.4505	0.521333	0.617	0.8	1.21	1.835	1.14	0.87	1.568	1.38	1.48	1.28067	1.63	2.15	2.74	1.796	3.05	4.03	3.51	1.96	1.96951	2.13	2.37	2.53367	3.38633	2.69	2.63	2.1	3.03	2.875	3.58	3.3	3.32	2.88696	3.73	1.93	3.71	4.16	3.81	3.7	4.3129	2.18	3.231	4.68	4.58993	3.81	8.23	5.83
2	0.272	0.7545	0.591	1.577	0.87	0.28	1.96833	1.38	1.091	1.552	2.38	1.58	1.97033	1.93	1.64	2.04	1.43	2.6	4.97	2.62	2.19	2.51829	2.39	2.47	1.62667	2.83067	2.92	3.29	2.68	4.48	3.482	3.0118	2.82	3.84	3.5413	3.33	2.85	2.62	3.9	4.02	4.86		2.92	4.965	4.8	4.87399	6.39	9.2	7.22
3	0.036	0.4005	0.727667	0.489333	0.92		1.10467	1.41	0.954	1.351	0.49	1.53	1.601	2.17	1.59	2.55	2.873	1.46	1.38	2.1	2.78	2.15122	2.75	2.72	3.99867	3.323	2.17	3.04	4.1	3.76	2.795	3.0752	3.37	3.3	3.35217	2.76	5.35	3.33	2.49	5.99	5.58	5.99969	4.86	5.222	4.54	5.12926	5.05	5.52	6.93
4	0.107	0.636	0.434	0.913667	0.81		1.59167	1.19	0.891	1.861	1.86	1.4	1.78067	1.84	1.93	2.14	1.865		2.5	3	2.01		2.28	2.26	3.74933	3.34567	2.54	2.86	3.19	3.37	3.154	3.9092	3.02	3.1	2.7413	2.73	3.08	2.24	2.12	3.36	2.7	3.65657	1.77	5.892	6.75	3.76945	4.49		3.76
5	0.06	0.696	0.718667	0.560333	0.98	0.82	1.40633	1.41	2.079	1.464	1.27	1.45	1.562	1.73	1.62	3.21	2.585	1.92	1.19	2.87	2.1	3.20488	2.29	2.53	2.56833	3.288	2.77	3.49	4.95	7.34	3.27	3.393	6.43	5.25	3.7413	4.48	2.9	5.18	7.46	3.17	4.16	3.9775	6.14	4.23	3.89	7.31431	7.83	3.84	8.12
7	0.121	0.841	0.804	0.456333	1.14		1.61433	1.55	1.93	1.582	1.36	1.63	1.67567	1.97	1.67	2.1	1.75		1.1	2.66	2.84		2.96	1.64	2.44467	2.23333	2.81	3.66	3.62	2.84	3.82	3.5108	2.22	2.91	4.57826	4.92	4.51	3.45	4.5	5.44	7.1	4.74423	3.4	4.548	3.75	5.64566	5.44		6.34
8		0.72	0.818333	0.629	1.09	0.59	1.857	1.45	1.635	1.745	0.9	1.65	1.38633	1.98	1.91	2.65	2.292		1.68	2.61	3.13	2.79512	3.08	2.48	3.53733	4.328	3.57	2.65	4.43	2.13	3.292	3.4404	4.17	3.71	3.42174	6.26	3.24	5.38	1.67	3.52	5.56	5.23404	9.22	4.41	4.54	5.8574	6.48	6.3	8.29
9	0.032	0.8725	0.835	0.454	1.06	0.46	1.143	1.7	1.686	1.535	1.7	1.76	1.704	2.46	1.83	2.3	2.351	3.64	2.61	2.22	3.93	1.87561	3.85	2.16	3.006	3.17767	2.64	2.27	2.35	1.18	2.96	4.0558	3.03	3.8	3.41957	4.73	4.78	5	5.74	4.92	4.52	4.70521	5.88	4.818	7.49	4.48623	6.75	6.26	6.2
10	0.015	0.9375	0.86	0.0413333	1.02	0.31	1.45133	1.51	1.709	1.349	1.64	1.63	1.694	2.35	2.72	2.52	2.839	1.6	1.69	1.46	2.93	3.62195	3.16	3.6	2.874	2.21533	4.27	1.42	3.8	5.16	4.269	4.7688	2.37	3.96	3.76087	4.6	4.84	4.14	5.73	5.23	5.72	4.46791	6.6	6.965	5.06	4.60256	6.9	5.07	7.71
11	0.135	0.5825	0.403	0.654333	0.85	0.72	1.28433	1.48	1.28	1.235	1.36	1.55	1.42767	2.04	1.77	2.76	1.469	1.13	1.99	2.81	2.86	1.7	2.81	2.74	3.124	2.71533	3.77	2.5	3.95	3.94	2.631	4.7336	2.27	4.75	3.55217	3.73	4.03	3.72	5.12	4.09	3.66	3.54706	5.07	4.685	5.34	3.77902	4.54	5.19	5.64
12	0.147	0.34			0.95	0.62		1.52	1.52	1.31	1.36	1.53		1.92	1.82	1.6	2.803	2.2	4.27	1.78	2.12	2.52927	2.35	2.14			2.82	2.9	4.12	3.36	3.582	1.99	3.37	4.39	5.17174	5.11	3.86	5.67	3.28	4.14	5.64	5.48299	6.35	4.825	4.85	7.60159	6.12	6.56	6.5
13	0.316	1.026	0.673333	0.989667	0.89	1.3	1.97733	1.31	1.15	1.783	2.03	1.34	1.82933	1.96	2.23	1.56	3.47	3.53	0.94	2.75	2.54	3.28415	2.51	2.81	2.4	3.29833	5.16	3.05	3.62	2.83	3.183	3.0824	4.18	5.2	4.32391	5.26	3.72	4.77	2.75	4.64	3.16	5.22546	3.91	4.822	4.41	5.88681	6.13	8.35	7.04
14	0.043	0.7785	0.932667	0.721667	0.82	0.24	1.60067	1.17	1.305	0.892	1.84	1.3	1.72167	1.68	1.47	1.48	2.296	1.67	2.64	2.32	1.88	2.37195	1.96	3.18	2.969	3.30567	2.85	2.11	2.25	3.3	2.44	3.946	1.96	2.96	2.73043	4.09	4.77	3.59	5.26	4.78	3.56	5.50026	6.42	4.052	4.22	6.08465	5.19	6.3	5.98
15	0.113	0.5495	1.02067	1.67433	1.2	0.26	1.64533	1.58	1.705	1.31	1.39	1.66	1.6	2.16	1.46	2.25	2.054	1.11	3.3	2.35	2.83	1.86098	2.86	2.41	2.63867	2.608	2.7	2.45	2.94	2.83	3.55	3.7138	3.26	3.13	4.13913	3.55	4.93	5.3		4.54	4.58	5.0598	6.24	4.972	4.63	5.05517	6.74	4.82	7.32
16	0.088	0.33			0.93	0.84		1.33	1.215	1.684	1.7	1.18		1.72	1.92	2.39	1.997	2.37	1.41	2.71	2.86	1.83293	2.83	2.38			3.12	3.97	2.18	2.63	2.243	3.335	4.56	3.22	4.11304	5.23	1.87	5.52	3.55	2.81	2.22	3.48927	6.29	3.844	3.38	3.59811	6.01	3.99	8.17
17	0.033	0.5015	0.617	0.76	0.97	0.72	1.18967	1.44	1.39	1.092	1.37	1.4	1.75467	1.91	1.96	1.18	1.838	2.37	1.87	2.17	2.56	2.69634	2.56	2.47	2.25533	2.31233	3.35	2.82	3.13	2.73	2.167	3.7696	3.64	3.89	3.72609	5.42	4.38	4.98	3.53	6.59	3.94	4.28652	6.18	3.085	7.28	5.31836	5.29	5.56	6.94
18	0.207	0.786	0.397	0.853667	1.24	2.98	1.41867	1.62	2	1.501	1.16	1.71	1.821	2.16	2.68	1.93	3.069	1.98	1.68	2.15	3.4	2.84268	3.75	4.05	3.69733	3.94467	4.33	3.37	4.13	4.49	3.648	4.4896	4.58	4.91	3.7	4.09	4.2	2.73	4.47	5.18	4.1	5.75226	3.21	5.281	5.29	4.75296	4.4	6.43	6.82
19	0.09		0.621	1.62767	0.86	1.5	1.76433	1.33	1.019	1.287	1.34	1.43	1.36733	1.84	2.15	2.21	1.989	2.35	2.95	1.86	2.02		2.29	2.9	3.24467	3.12233	2.11	3.14	3.51	3.76	3.881	3.4462	2.88	3.27		3.88	2.94	5.18	3.03	5.75	5.18	4.28518	4.6	5.48	3.38	5.36436	5.98	5.62	7.38
20	0.124	0.6275	0.980667	1.48067	1.01	0.47	1.31267	1.58	1.077	1.155	1.93	1.56	1.81767	2.11	2.62	2.28	2.569	2.2	3.09	3.59	2.91	3.25	2.97	3.53	2.53233	2.31833	3.77	3.48	3.26	2.24	3.8	4.6176	4.97		3.98913	4.47	3.83	5.03		5.49	3.86	5.44696	2.62	4.676	6.52	5.9214	5.46	6.11	7.68
21	0	0.8675	0.822667	0.811	0.85	1.6	0.541667	1.4	1.83	1.653	1.53	1.53	1.46433	1.98	2.35	2.02	2.014	2.49	1.13	2.47	2.74	3.34146	2.8	3.01	2.053	2.99833	3.21	2.92	3.02	1.91	2.704	3.3638	5.48	2.49	4.38478	4.63	3.02	4.38	7.15	3.73	2.92	4.04284	5.46	4.223	3.85	5.21892	5.66	7.39	6.21
22	0.097	0.7875	1.04567	0.532667	1.17	1.29	1.37567	1.55	1.565		1.51	1.82	1.647	2.01	2.63	1.74	2.042	2.1	3.01	2.16	2.99	2.61829	2.93	3.07	3.88267	3.606	4.44	3.12	2.55	3.94	2.964	3.2696	3.04	4.09	3.80435	5.39	6.57	4.41	4.36	6.23	6.16	4.69	4.2	4.596	5.71	6.66022	6.02	7.11	7.01
23			1.01933	1.28133	0.95	1.13	1.465	1.53	1.56	1.828	1.37	1.53	1.59433	1.96	2.18	2.96	2.988	2.21	1.56	2.24	2.97	3.58293	3.24	3.89	3.50733	3.069	3.64	2.21	2.51	2.66	3.31	3.6556		2.44	3.31739	4.09	4.98	4.42	4.62	4.59	4.6	6.39327	7.94	3.81	6.86	4.17462	6.95	8.93	7.26
24	0.211	0.482	1.35667	0.843	1.1	1.11	1.81167	1.59	1.529	1.837	1.57	1.72	2.081	2.25	1.7	1.78	2.652	3.33	2.63	3.35	3.4	2.52317	3.4	2.95	3.68367	4.16067	3.68	3.16	4.47	4.28	3.458	4.7666	2.89	5.29	4.55	3.65	5.26	2.73	5.46	4.31	4.46	4.63479	5.04	5.401	6.47	4.85885	6.86	10.76	6.78
26	0.177	0.934	0.661667	3.37167	0.85		2.27233	1.36		2.004	1.97	1.58	2.04067	2.03	1.61	1.99	1.431		5.49	3.05	2.04		2.07	2.24	2.864	3.90033	2.51	4.44	2.93	2.3	2.354	2.7438	3.32	2.98	4.88478	2.66	5.31	2.79	3.88	4.98	3.3	3.30443	1.8	3.395	7.12	5.89266	4.98		7.45
27	0.042		0.716	0.515667	1.03	0.52	1.126	1.39	0.989	1.387	1.57	1.26	1.06867	1.77	1.51	1.49	2.318	2.92	3.21	2.23	2.4	2.37927	2.54	2.03	2.42533	3.40533	2.45	2.62	3.61	2.92	2.621	2.8182	3.82	3.59	3.64565	4.03	3.99	3.89	3.42	3.53	3.62	3.48089	4.31	3.154	4.55	4.04054	5.62	7.38	6.27
28	0.24	0.688	0.786	1.24367	0.91	0.92	0.207667	1.43	1.211	0.616	1	1.42	1.765	1.82	1.63	1.34	2.005		5.51	2.29	2.55	1.87805	2.55	3.37	3.03133	1.53333	1.36	2.43	2.17	3.78	3.271	3.0662	2.73		5.84565	2.66	4.27	3.29	3.83	6.09	4.98	5.12523	4	5.305	6.11	6.10168	4.43	3.69	4.72
29	0.017	0.69	0.325	0.830333	0.97		1.10933	1.4	0.915	1.483	1.85	1.34	1.133	1.73	1.7	1.39	2.515		2.37	2.6	2.61		2.59	2.58	2.24	2.39033	3.96	2.13	3.48	3.94	3.256	3.369	3.29	4.17	3.73261	1.82	4.27	2.78		5.21	3.7	3.78851	3.68	4.751	6.48	3.74962	5.72		5.6
30	0.225	0.6095	0	0.508333	0.89	1.62	1.20033	1.41	1.809	1.377	1.6	1.31	1.05267	1.72	2.1	1.88	1.359	1.68	4.27	1.92	2.79	2.66341	2.74	2.52	1.794	2.60967	3	2.24	3.34	2.02	3.196	2.6772	2.79	3.08	2.92174		2.91		5.53	3.03	2.72	5.0432	5	3.563	6.17		5.33	6.33	7.79
32	0.141	0.878	0.549667	0.728333	0.95	0.59	1.703	1.59	1.585	1.513	1.15	1.55	1.66667	2.09	1.97	1.97	5	1.86	3.12	2.93	2.4	1.84634	2.61	2.37	3.22033	2.66733	2.77	3.58	3.83	5.31	3.829	3.5294	4.92	2.94	4.5587	4.66	3.98	4.48	4.16	4.53	2.58	5.15443	4.82	4.963	4.27	5.16812	6.59	5.1	7.3
33	0.187	0.8945	0	0.333333	0.98	1.83	2.06167	1.61	1.445	1.493	1.91	1.67	1.502	2.36	2.55	2.55	1.976	4.04	3.31	2.86	2.46	2.77439	2.54	2.8	2.52367	3.07233	3.22	2.84	3.97	5.72	3.708	3.2324	1.89	4.16	4.15217	3.99	4.38	3.86	4.39	4.14	3.24	3.48416	5.57	4.323	3.97	5.42744	5.38	10.44	6.72
34	0.158	0.6125	0.559333	0.479667	0.84	0.67	0.642333	1.26	1.299	1.581	1.03	1.31	1.201	1.61	1.59	1.91	1.018	2.32	2.5	1.93	2.88	2.02195	2.89	1.9	2.69933	2.41033	2.58	2.67	2.38	1.84	2.355	2.7458	3.54	2.12	1.73913	2.28	2.72	2.94	5.31	3.57	3.24	3.75713	2.93	4.607	2.93	3.33536	4.97	4.13	4.7
35	0.028	0.5425	0	0.674	0.86	1.24	0.922	1.29		1.397	1.43	1.39	0.87	1.73	2.26	1.75	1.784	1.55	0.56	2.21	1.73	2.73902	1.93	1.85	2.078	2.055	2.31	3.52	2.77	3.1	2.469	3.3914	3.15	2.96	2.27391		3.06		4.52	3.37	4.84	4.89862	2.55	2.727	3.06	4.85257	4.99	5.68	5.46
36	0	0.587	0.297333	0.201	0.96	0.1	0.424667	1.34	1.345		1.26	1.51	0.871	1.72	2.04	1.9	1.792		1.11	2	3.01	1.20976	2.97	2.91	2.88633	2.598	2.98	2.52	2.58	3.48	2.374	3.428	3.39	2.79	3.80652	2.05	5.57	2.33	2.45	4.55	3.48	3.48354	4.94	3.803	4.46	3.83419	4.43	6.75	6.33
37	0.136	0.696	0.701333	0.566667	0.88	1.44	0.505	1.3	1.45	1.346	1.31	1.37	0.854667	1.71	1.84	1.76	1.508	1.94	0.93	2.09	2.66	1.4622	2.57	2.5	2.51467	2.81167	3.59	2.33	2.19	5.22	2.61	3.3076	3.36	2.5	2.64565	3.28	3.56	4.55	4.43	3.83	3.86	4.72012	10.84	4.409	4.34	4.59078	5.79	5.45	5.71
38	0.061	0.566	0.152667	0.399333	0.72	0.93	0.959667	1.06	1.33	1.4	1.36	1.24	1.25633	1.52	1.17	0.88	2.201	2.05	1.73	1.39	1.55	1.54634	1.49	1.66	1.992	2.447	2.13	2.6	1.58	4.88	1.843	3.0526	2.01	1.62	2.85435	1.59	2.51	1.08	2.94	1.86	4.68	3.2946	4.3	3.728	2.15	2.61553	1.74	4.49	3.96
39	0.093	0.693	1.36333	0.649333	0.84	0.86	1.37133	1.39	1.375	1.702	1.62	1.5	1.59567	1.84	2.31	1.47	1.412	2.41	2.91	2.76	2.18	3.05488	2.32	4.09	2.35867	2.867	2.87	3.32	3.27	3.09	3.88	2.7348	4.75	2.68	3.30652	5.62	3.73	4.69	3.71	4.03	4.42	3.95446	4.74	4.025	3.24	6.20766	6.04	6.22	7.87
40	0.143	0.47	0.662	0.478667	0.72	0.3	1.412	1.02	1.09	1.19	1.75	1.14	1.18567	1.41	1.89	1.34	1.51	1.01	1.82	2.16	1.59	2.67317	1.53	2.46	2.23	2.02567	3.4	2.41	3.27	2.46	1.8	2.7388	2.76	2.5	4.07826	2.44	2.39	2.52	2.68	2.58	2.92	3.95261	3.58	3.513	2.82	3.6314	3.55	3.54	5.26
41	0.069	0.325	0.602	0.0983333	0.86	0.12	1.39033	1.43	1.215	1.177	1.2	1.37	1.457	1.89	1.35	1.15	1.764	3.17	3.8	1.25	2.73		3.05	1.17	2.824	1.63033	1.6	2.68	2.47	4.24	2.73	2.5958	1.26	1.75	2.83043	0.99	5.2	1.33	0.56	7.02	4.06	2.5103	3.08	4.468	5.64	3.67989	4.96	3.86	3.6
42	0.008	0.335	0.847667	0	0.81		1.26567	1.17	0.901	1.349	0.85	1.27	1.73133	1.63	0.91		2.2		0.66	1.45	1.85		1.94	1.4	2.01833	2.25533	1.87	2.57		4.96	1.811	2.1464	3.01	3.51	3.39783	2.49	3.85	1.66	0.23	4.35	3.4	1.98437	1.15	3.418	3.04	3.16852	2.4		3.42
43	0.009	0.428	0.559667	0.951	0.85	1.32	1.70667	1.31		1.032	1.52	1.23	1.38867	1.65	1.77	1.26	2.154	3.07	2.59	2.71	2.01	2.14634	2.05	3.08	4.07967	3.64167	2.74	3.94	2.28	1.68	2.87	3.1676	5.3	4.77	3.22609	3.53	5.4	2.63	5.39	4.88	5.42	3.96248	6.41	4.307	4.66	4.02183	5.57	8.88	6.63
44	0.018	0.419			0.92	1.28		1.38	1.319	1.891	1.35	1.29	*	1.7	2.21	0.75	1.849	2.48	1.2	3.22	2.92	2.36585	3	2.72			3.57	3.59	3.89	4.24	3.074	3.6634	3.18	4.85	2.64783	3.87	5.26	3.3	7.13	4.1	5.4	5.56551	5.66	4.564	4.13	6.21697	4.15	5.47	5.62
45	0.1	0.7105	0.593	1.04967	0.82		1.65567	1.26	1.6	1.368	0.93	1.51	1.52833	1.8	1.77		1.139		2.79	2.19	1.76		1.92	2.44	2.57833	2.931	2.89	2.26	2.89	4.96	3.541	3.8778	5.2	3.48	4.55435	2.52	2.82	4.32	2.78	4.24	2.32	3.18281	3.92	4.636	3.16	5.49529	5.45		7.03
46	0.113	0.9125	0.806667	0.747667	0.89	0.53	1.64967	1.42	1.68	1.325	1.19	1.36	1.46667	1.8	2.62	2.45	1.567	2.51	2.13	3.13	1.69	3.45976	1.74	3.28	2.393	3.49967	3.56	2.93	3.88	1.68	3.526	2.6952	4.62	3.61	3.6587	6.05	3.26	5.42	4.8	4.07	5.12	3.94689	8.07	4.547	4.52	5.60503	6.76	8.15	8.59
47	0.319	0.7645	0.728333	0.522333	0.81	1.12	1.185	1.28	1.606	0.835	1.22	1.26	1.41167	1.71	1.54	1.52	2.166	1.73	3.01	1.37	2.32		2.4	2.19	2.44833	2.52067	2.38	2.99	1.98	4.96	2.511	4.5988	1.59	1.93	2.73913	1.41	4.46	1.43	2.87	5.64		4.81501	2.49	3.371	4.92	3.9696	3.24	4.26	4.6
48	0.012	0.45	0.972333	0.592	0.85	0.63	1.392	1.46	1.709	1.203	1.3	1.63	1.49433	2.21	2.15	2.57	3.376	1.51	1.34	2.69	2.41	3.27439	2.66	2.99	3.42133	2.77267	3.18	3.55	4.27		3.979	3.4534	4.43	4.14	4.13478	5.07	5.32	3.23	6.08	5.19	5.02	5.83075	4.28	5.791	5.84	5.26098	6.86	8.82	7.33
49	0.064	0.4	1.122	0.380333	0.8	0.94	1.21567	1.15	1.049	0.622	1.08	1.42	1.64933	1.6	1.17	1.68	2.42	4.26	1.86	0.75	1.69	1.93415	1.64	1.69	2.63833	1.51867	1.93	2.7	1.65	5.22	1.969	3.2958	1.51	1.38	1.70652	1.76	4.02	2.39	1.98	3.13	3.6	3.00819	6.78	3.44	5.45	2.56613	3.02	7.27	4.46
50	0.062	0.4545	0.941667	0.409333	0.94	0.47	0.755	1.48	1.09	0.928	1.18	1.48	1.123	1.9	1.36	2.5	2.156	2.3	1.95	2.45	2.7	2.7	2.87	1.61	1.93	2.438	2.23	2.44	3.28	3.48	2.419	3.1034	3.57	3.23	4.41304	1.72	4.63	3.7	3.51	5.95	3.7	4.11155	6.49	3.292	4.74	4.82998	9.57	7.22	5.79
51	0.044	0.6965	1.34933	0.411	0.88	0.31	1.932	1.47	1.519	1.325	1.19	1.58	1.703	2.1	2.52	2.22	2.027	3.32	1.43	2.58	2.18	3.41585	2.24	3.19	2.47633	2.94933	3.53	3.95	3.54	3.1	2.656	2.7754	4.34	4.51	5.31522	3.87	3.61	5.12	4.62	4.09	4.96	3.79341	5.17	3.336	5.28	5.25232	5.89	7.78	9
52	0.068	0.7405	0.915667	0.914	0.93	2.46	1.271	1.5	1.575	1.462	1.68	1.42	1.67933	1.87	1.99	1.85	1.65	2.56	2.73	2.36	2.09	2.90732	2.09	3.01	2.42767	3.39333	3.1	2.8	3.34	2.02	3.934	3.3846	4.22	4.23	3.61739	4.52	3.44	4.03	4.16	4.08	4.7	4.68847	6.53	4.92	4.48	5.65324	6.89	6.17	7.11
53	0.05	0.444	0.419667	1.39767	0.85	1.05	1.60633	1.42	1.56		1.01	1.4	1.47733	1.94	1.83	2.82	3.13	1.95	2.05	2.82	2.53	3.15122	2.81	3.07	2.427	2.68733	2.58	3.96	3.75	3.56	2.871	3.4882	4.61	4.74	3.98696	5.21	4.04	5.4	6.38	5.58	4.74	5.3819	4.17	5.283	5.02	4.49863	6.45	3.88	9.17
55	0.063	0.6665	0.61	0.486667	0.75		1.50567	1.27	1.525	1.385	1.26	1.44	0.968	1.83	1.99	1.25	1.608		2.95	1.98	2.16		2.15	2.83	3.111	2.44333	2.94	1.96	3.59	3.11	2.873	2.9238	2.88	3.37	3.31739	3.02	3.42	3.93	1.58	4.66	3.64	2.91278	2.65	4.553	4.3	5.58329	3.99		6.07
56	0.134	0.926	0.718333	0.697667	0.77	1.12	1.019	1.32	1.35	0.846	1.28	1.55	1.613	1.94	2.99	2.24	1.282	2.01	2.84	3.31	2.22	3.44024	2.31	2.87	2.43467	3.489	4.49	3.29	3.86	3.86	3.536	3.0094	3.35	4.38	5.11304	4.66	4.2	5.06	4.41	5.44	4.1	5.63866	7.2	5.311	4.69	6.49488	7	9.52	7.9
57	0.152	0.3965	1.523	0.974	0.9	1.34	1.33633	1.39	1.014	1.074	1.87	1.45	1.65433	1.94	2.04	1.45	2.371	1.86	0.94	1.95	2.84	2.71341	3.03	2.24	2.28167	2.81333	1.91	2.84	3.89	2.97	3.129	3.7096	2.56	4.66	4.27391	4.65	3.51	4.69	4.61	3.3	4.32	4.48291	8.36	5.261	4.56	5.98191	7.17	5.97	7.95
58	0.253	0.809	0.655333	1.345	0.97	1.52	2.061	1.53	1.42	1.837	1.64	1.67	1.55733	2.22	2.16	2.89	2.756	3.47	3.99	2.97	2.73	2.40732	2.83	3.3	2.397	2.41967	3.51	3.71	3.82	2.95	4.338	3.6502	4.92	4.08	4.12609	4.66	4.61	5.69	3.72	4.11	6.58	4.29138	7.31	5.605	4.91	6.66661	7.34	9.9	8.81
60	0.062	0.3985	0.717667	0.716333	0.94	2.13	1.71933	1.45	0.905	1.537	1.68	1.48	1.60567	2.04	2.63	2.28	1.998	1.75	3.83	2.6	2.48	2.70366	2.5	2.22	2.097	2.134	3.63	2.85	3.12	3.6	3.664	2.8068	5.28	2.72	5.06087		2.77		4.41	2.99	4.14	3.65329	6.04	4.628	2.54	5.12152	5.61	4.01	6.07
62	0.019	0.71	0	0.838333	1.02	1.19	0.971667	1.5	1.611	1.167	1.44	1.62	1.02167	2.07	1.8	2.08	1.796	2.44	1.62	2.64	2.4	2.64878	2.59	2.59	2.90567	3.37633	3.27	3.26	2.61	3.98	3.588	2.0826	3.05	3.18	3.55217	3.86	4.54	4.42	1.56	5.18	4.94	4.73979	10.03	5.947	4.42	5.30714	4.72	7.1	6.22
64	0.115	0.7015	0.921333	1.07867	0.95	1.34	1.30733	1.37	0.985	1.658	1.61	1.33	1.51667	1.95	2.17	3.06	1.851	2.13	1.7	2.6	2.71	2.59756	2.73	2.86	3.31733	3.08867	3.25	2.71	2.4	2.09	3.508	3.7104	2.94	2.29	4.33478	4.52	4.28	3.72	4.24	4.15	4.78	4.49007	5.28	5.609	4.95	5.932	4.17	6.74	6.15
65	0.083	1.0225	0.817333	1.838	1.06	1.77	0.793667	1.58	1.475	1.379	1.98	1.41	1.50133	1.98	1.76	2.97	3.418	1.77	2.12	1.62	2.08	$0	2.18	2.91	1.92767	2.77267	3.73	3.32	3.74	4.05	4.003	2.9952	4.75	3.83	4.13261	4	3.54	5.61	4.51	4.89	3.86	4.39131	3.71	4.4	4.97	4.53938	6.21		7.25
66	0.077	0.6465	0.324333	0.66	0.91	2.23	1.76567	1.39		1.275	1.6	1.25	1.53067	1.96	2.39	2.7	2.766	2.41	1.74	2.03	3.17	2.51951	3.14	3.3	3.68667	4.413	3.3	3.68	3.31	4.68	4.064	2.2626	2.3	3.74	4.46087		3.82	5.55	3.24	5.22	4.7	3.47578	6.26	5	5.94	6.59862	6.48	6.32	8.99
67	0.348	0.775	0.506667	0.648	0.71	0.99	1.72967	1.24	1.075	1.405	1.07	1.36	1.529	1.66	2.11	2.76	1.448	2.17	3.43	2.81	2.37	2.81463	2.4	2.17	2.719	2.68	2.43	3.35	3.15	2.48	3.518	3.1558	4.38	3.18	3.36304	4.6	3.13	5.21	3.75	3.69	4.02	3.85249	2.95	4.442	4.6	4.15485	5.97	4.69	7.36
69	0.054	0.743	0.723333	1.96967	0.99		1.84367	1.54	1.219	1.321	0.96	1.44	1.59233	2.03	2	1.64	3.569		1.58	2.86	2.66	0	2.62	3.29	3.54	3.10167	2.46	2.6	2.72	3.34	3.028	3.4966	2.82	3.85	4.0587	3.7	3.9	4.9	3.08	5.43	4.08	5.66044	1.6	3.811	5.7	5.11739	3.21		7
70	0.221	0.5635	0.662667	0.933	0.83	0.68	1.28667	1.29	1.095	2.058	2.06	1.12	1.34933	1.64	2.16	2.12	2.228	2.47	1.85	2.57	1.79	2.38902	2.03	3.18	1.892	2.70367	3.15	3.25	2.45	2.41	3.74	3.629	3.45	3.02	2.51522	4.65	1.89	5.27	3.69	2.3	3.3	3.62998	5.98	4.877	3.52	4.17901	3.9	4.79	6.24
72	0.095	0.452	0.414667	0.792333	0.74	1.22	1.09733	1.12	1.386	1.727	1.37	1.03	1.27867	1.43	1.69	2.38	1.82	1.43	1.79	1.79	2.1	1.9	2.08	1.98	2.105	2.768	2.35	3.16	1.98	1.48	2.53	3.7254	4.67	2.43	3.41522	4.34	2.33	4.35	5.88	2.24	4.34	3.96407	3.8	3.889	2.23	3.08222	4.24	6.17	6.23
80	0.143	0.5805	0.473667	0.45	0.89		1.02567	1.34	1.446	1.063	1.5	1.47	1.232	1.84	1.63	2.27	2.28		0.92	2.45	2.32	1.89024	2.26	2.95	2.92167	2.74567	2.29	3.45	2.05		3.129	2.308	2.79	3.18	3.12174	2.98	4.4	2.99	3.23	4.03	3.26			5.483	4.46	2.97533	4.21		5.56
86	0.11	0.5515	0.272667	0.771667	1.23	1.5	1.04133	1.54	1.46	1.431	0.86	1.66	1.44933	2.03	1.76	2.59	1.723	2.14	2.23	2.37	2.85	2.26951	2.81	2.93	2.76333	3.20733	3.21	2.38	2.07	2.5	2.36	2.5196	2.4	3.87	2.76304	3.41	3.04	4.19	3.95	3.3	4.54	4.46722	2.93	3.706	3.4	5.16634	4.43	5.93	6.16
87	0.075	0.659	0.927333	0.82	1.06	0.52	1.245	1.55	1.7	1.588	1.5	1.77	0.948	2.28	1.76	2.18	2.887	1.61	2.6	2.82	3.06	1.91707	2.8	3.29	3.62167	3.01867	3.06	3.16	2.98	1.27	4.53	3.7874	1.74	3.28	4.75652	3.13	3.45	3.95	7.31	3.5	4	4.37787	5.67	5.368	4.16	4.82717	5.23	6.23	7.1
88	0.055	0.368	0.645333	0.776	1	2.42	0.524667	1.49	1.59	1.29	1.39	1.49	1.37867	1.99	2.29	2.14	2.105	2.08	1.42	2.59	2.87	3.32073	2.88	2.94	2.43867	2.36667	2.51	3.38	3.12	1.26	3.238	2.5024	3.8	3.52	3.41522	3.63	3.27	5.41	6.41	3.88	4.78	4.84951	3.71	4.849	4.76	6.72609	6.74	7.14	6.64
90	0.284	1	0.969	0.107667	1.02	0.73	1.80433	1.6	2.42	1.104	1.33	1.76	1.95133	2.29	2.59	2.48	2.99	4.29	2.56	2.46	2.82	3.45366	2.89	3.23	2.80267	3.63567	4.32	3.81	4.19	1.71	5.356	3.9534	2.51	3.6	4.3087	3.87	4.56	4.8	4.91	4.66	4.48	5.74298	5.93	5.733	5	6.02485	7.95	8.47	11.03
91	0.072	0.612	0.822667	0.123667	1.03	0.25	1.18167	1.62	1.7	1.189	1.65	1.57	1.58367	2.17	2.2	1.67	2.639	3.89	1.69	2.07	3.72	1.51829	3.99	2.64	2.79033	2.77133	3.45	3.46	3.11	3.19	4.685	4.1784	5.84	4.17	2.11739		4.62		6.93	4.5	3.84	5.10172	4.31	5.134	4.57	3.9102	7.49	6.06	7.9
92	0.03	0.4645	0.325	0.217667	0.88	1.76	0.803333	1.35	1.399	1.584	1.67	1.23	0.857667	1.72	1.83	1.27	1.418	1.95	2.11	2.92	2.46	1.83415	2.4	2.38	2.10333	2.483	3.48	1.99	2.82	2.55	3.082	3.1038	3.84	3.34	2.1413	3.31	3.93	2.84	4.69	3.22	4.46	3.66045	1.56	5.156	5.2	4.88765	6.05	6.63	5.98
93	0.071	0.4825	0.634667	0.529333	1.16	0.65	1.402	1.62	1.26	1.377	1.49	1.76	1.21567	2.36	2.4	2.08	3.015	2.35	2	2.31	2.93	3.73415	2.85	2.87	2.15867	3.59233	3.71	2.22	3.53	3.33	4.643	3.5184	4.22	3.54	4.0087	3.9	2.99	4.71	4.9	3.31	3.84	4.03763	4.52	5.608	4.91	4.67829	5.94	9.02	6.72
94	0.033	0.6235	0.106667	0.0823333	0.76	0.45	0.386667	1.28	1.109	0.995	0.66	1.34	0.899667	1.78	1.69	1.71	0.731	1.02	3.42	1.76	2.17	2.58293	2.28	2.17	2.14333	2.64467	1.64	2.81	2.61	1.59	3.359	2.4722	3.55	3.53	3.48696	2.52	3.21	3.5	4.79	3.1	4.92	3.14145	5.27	4.409	5.09	5.72642	3.07	7.01	5.01
96	0.12	0.794			0.82	3.14		1.2		1.492	1.74	1.41	*	1.88	2.18	2.89	2.055	3.18	4.58	2.46	1.91	2.58537	2.01	2.65			4.23	2.45	2	2.14		2.9606	4.06	3.79	4.23478		4.03		5.93	3.58	4.68	4.85012	3.47	4.657	4.02	4.60331	5.67	8.13	6.96
97	0.021	0.7675	0.482333	0.369333	0.69	1.28	1.60967	1	1.365	1.413	1.13	1.38	1.30033	1.65	2.12	2.67	1.207	1.99	1.87	2.65	1.93	2.9	2	2.6	2.41767	3.24533	2.3	3.74	3.12	3.19	2.444	2.8756	3.36	3.99	1.49565	4.77	3.65	5.34	4.92	3.44	2.82	3.55923	8.2	3.797	3.85	6.2858	6.59	2.9	6.67
99	0.013	0.516	0.493	0.440333	0.8	0.49	1.18633	1.18	1.535	1.232	1.42	1.41	1.36833	1.75	1.69	2.71	1.526	0.81	1.8	2.37	2.24	3.36585	2.26	2.25	3.366	2.51233	2.23	3.39	3.5	3.33	3.052		4.78	3.96	3.33913	4.41	2.46	4.16	5.44	3.65	3.08	4.00669	4.46	5.085	3.13	4.52443	6.69	4.58	7.5
102	0.1	0.9335	0.259667	0.834667	0.95		1.34567	1.46	1.521	1.244	1.24	1.67	1.527	2.23	2.16	3.15	2.836		3.26	2.18	2.15		2.24	3.24	3.128	2.08967	3.04	4.04	4.03	3.33	4.038	3.439	2.51	3.57	4.62174	3.18	4.77	4.24	2.94	4.02	6.42	4.96993	2.39	5.78	5.41	5.66941	5.07		7.62
104	0.057		0.747	0.381	1.02		0.55	1.61	0.971	0.798	1.71	1.52	1.67267	2.07	2.44	2.42	2.6	1.16	3.15	2.97	3.44	1.85122	3.54	2.93	2.824	2.499	2.77	2.59	3.09	1.15	3.954	1.9632	4.53	3.67	3.12391	4.22	4.37	3.55	5.28	4.6	3.42	4.51962	2.44	5.58	5.34	4.7231	6.38	2.8	8.8
105	0.007	0.545	0.684	0.896333	0.77		1.51633	1.07	1.339	1.394	1.59	1.06	1.23433	1.55	1.92	2.19	1.957	1.43	2.04	1.56	2.27	1.66707	2.2	3.12	2.99	2.51933	3.75	3.97	2.86	3.54	3.011	3.2616	2.98	1.87	2.92826	3.44	3.74	4.02	4.59	4.48	3.96	5.1125	4.11	4.87	5.98	4.41911	5.61	7.63	7.09
114	0.176	1.024	0.239667	0.455	1.07		0.737	1.56	1.56		1.82	1.5	0.718	2.03	2.16	2.37	2.122		2.62	2.72	3.32		3.34	2.63	2.95867	3.19333	3.12	3.39	3.92	4.63	3.402	3.6192	2.48	3.92	4.41087	4.31	5.76	4.01	3.52	7.85	4.64	5.54505	1.82	5.411	4.08	4.41642	6.22		6.5
124	0.01	0.729	0.737	0.735	0.81	0.95	0.861333	1.17	1.275	1.663	1.36	1.15	0.87	1.72	1.64	3.25	2.281	3.18	0.61	3.53	2.33	1.9378	2.31	3.09	3.24733	3.277	3.4	2.66	3.26	2.88	3.415	1.942	4.13	4.49	2.66522	2.32	4.98	3.39	5.93	4.24	3.3	4.44024	3.7	6.335	5.04	3.30927	5.46	2.57	5.45
127	0.102	0.4165	0.763	0.447333	0.86	1.14	1.60467	1.42	1.325		1.34	1.29	0.856667	1.76	1.71	2.15	3.29	2.29	1.48	2.72	2.31	1.98171	2.31	2.86	1.68733	2.71533	2.39	2.19	2.63	1.44	3.338	2.781	4.42	4.28	2.7413	3.64	2.57	3.94	3.5	2.26	4.62	4.5431	4.17	4.605	5.82	4.25953	3.79	7.11	4.91
128	0.133	0.688	0.606333	0.335667	0.72	0.31	1.17	1.03	1.015	1.277	1.59	1.24	1.16533	1.54	1.88	2.95	2	2.17	3.14	2.69	1.58	3.01585	1.83	2.6	2.227	2.902	3.2	3.02	2.9	1.75	3.198	2.718	3.64	3.98	3.39348	5.18	3.16	5.16	4.17	4.14	4.18	3.55376	5.54	4.148	5.24	5.2475	6.18	8.84	7.3
144	0.073	0.4265	0.588333	0	0.81	0.2	0.137	1.2	1.45	1.04	0.47	1.37	1.30833	1.65	1.51	1.33	2.357	1.31	1.03	1.31	2.17		2.13	1.66	2.942	1.65533	1.47	2.94	2.29	3.2	1.77	2.5386	1.17		2.75652	1.74	3.31	1.3	$0.6	4.52	3.44	4.13712		3.09	2.7	4.37752	2.95		4.88
146	0.053	0.678	0.748333	1.05733	0.98		0.996333	1.56	1.829	1.719	1.27	1.51	1.772	2.05	1.6	3.09			7.97	2.54	2.18		2.26	2.11	2.83133	2.58733	2.4	4.05	2.97	3.14	3.666	4.2024	3.39	3.92	5.11739	3.92	5.13	3.61	2.18	8.65	4.46	5.04423	1.8	4.831	7.48	5.94315	5.33		6.67
Mean	0.103354	0.644725	0.661904	0.740367	0.91619	1.02928	1.29834	1.38798	1.39222	1.38154	1.42262	1.45107	1.43726	1.9006	1.95726	2.1239	2.1854	2.27116	2.41524	2.40869	2.48119	2.4947	2.54857	2.66381	2.7203	2.85604	3.00012	2.99512	3.12217	3.22524	3.20631	3.27479	3.49229	3.52642	3.64206	3.77897	3.89452	3.97658	4.20363	4.36286	4.21566	4.39026	4.76744	4.60286	4.72869	4.95987	5.50381	6.35371	6.65845
Mean 2007-9	Leaf 4 FW
25	0.061	0.786	1.041	1.54933	0.9		1.15267	1.44	1.08	1.687	1.27	1.47	1.86	1.93	1.59	2.23	3.231		2.03	2.12	1.57		1.93	1.91	3.77533	3.764	1.75	3.69	2.95	1.15	3.065		2.91	3.64	1.31304	2.98	2.6	3.31	2.06	3.99	4.62	4.90278	1.15	4.869	4.65	4.45915	5.87		6.06
31	0.034	0.592	0.358333	0.445	1.3		1.467	1.77	1.821	1.37	1.61	1.87	1.51733	2.42	1.83	2.11	2.475		1.95	2.78	3.27	2.46341	3.41	3.1	3.55433	2.58567	3.32	3.69	4.32	2.6	4.393	2.5646	4.53	4.7	2.94783	2.38	4.56	3.46	2.84	4.39	3.92	4.6969	2.32	5.68	5.22	5.03851	6.38		7.73
54	0.193	0.861	0.738333	0.204	1.06	0.74	1.86233	1.61	1.819	1.522	1.23	1.62	1.63433	2.19	2.01	1.72	2.923	2.99	1.06	2.39	2.98		3.21	3.42	2.79933	2.89167	3.08	3.01	3.71	2.9	3.837	3.4456	3.12	4.73	3.29565	2.52	4.32	3.24	5.02	4.93	4.3	4.30286	3.35	5.501	5.12	6.3555	5.92	6.15	8.04
59	0	0.3365	0.860333	0.756	0.64	0.48	0.599	0.93		1.472	1.21	0.95	1.46733	1.17	1.47	1.94	1.398	1.65	3.22	2.78	1.14		1.36	1.79	1.78933	2.55067	2.52	2.5	2.53	3.83	3.346	2.7812	1.9	2.89	2.82826		2.37		3.75	2.18	5.72	3.23484	3.83	4.975	2.64	5.50334	4.72	6.96	4.87
61	0.135	0.709	0.333667	1.02833	0.72	1.26	1.04	1.26	0.99	0.935	1.62	1.4	1.026	1.81	1.79	1.66	1.287	2.48	2.38	1.84	2.99	2.45976	2.99	3.24	1.54333	3.15767	3.01	2.81	2.51	3.29		2.1888	6.07	2.69	3.65652	4.04	3.12	3.39	3.78	3.8	5.02	5.20903	4.7		5.23	4.75809	6.06	6.1	6.28
63		0.68	0.569667	1.29767	0.83	0.22	0.796333	1.35		1.345	1.56	1.45	2.07533	2.08	1.77	2.88	3.75	1.87	1.31	1.91	2.41	2.98659	2.75	2.7	2.559	2.74233	3.37	2.58	4.01	2.38	1.853	3.506	2.93	4.21	2.63478	4.22	3.3	4.09	4.48	3.64	4.36	4.65117	2.62	3.532	3.85	5.72352	5.97	5.08	6.96
71	0.102	0.9655	0.681667	1.70733	0.81	0.34	1.69767	1.31	1.58	1.997	1.22	1.5	1.985	1.85	2.06	2.94	1.857	2.05	2.96	1.93	2.19	2.66098	2.27	2.19	2.54033	3.284	4	4.11	4.27	2.87	3.537	2.8766	5.17	4.81	5.94783	4.84	2.82	4.33		4.39	3.54	5.08724	5.8	4.357	4.02	5.66927	5.67	9.25	7.05
98	0.411	1.0495	0.609333	2.35733	0.79		1.95433	1.18		1.456	1.47	1.48	2.134	1.9	1.3	2.91	2.014		3.22	2.99	1.86		1.98	1.5	2.89967	2.93367	2.3	4.24	3.85	2.55	3.086	2.5708	3.31	4.6	3.6413	3.24	2.88	3.57	1.21	4.2	2.9	5.09316	$0.55	4.577	4.97	5.49017	6.95		6.5
115	0.018	0.567		2.68533	1		0.664	1.55	1.066	1.962	1.79	1.69	*	2.3	1.12		2.505		2.09	3.19	2.51		2.48	1.28	3.75167	2.697	1.74	3.71	3.79	3.54	2.917	2.681	3.31	3.95	2.39348	3.99	3.09	3.38		3.26	4.62	4.12311	1.85	6.6	3.94	3.19069	4.86		5.53
143	0.053	0.456	1.08133	1.65333	0.84		1.80533	1.37	1.2	1.332	1.77	1.53	1.86133	1.91	1.77	3.61	2.246		1.36	3.62	1.67		1.75	2.62	3.44867	1.587	2.43	4.05	4.91	2.45	3.288	3.9504	4.66	4.83	3.86957	4.56	5.96	6.33	3.18	6.33	3.44	5.37124	2.05	4.487	5.69	5.58945	4.97		6.65
Mean 10 Leaf FW	0.111889	0.70025	0.697074	1.36837	0.889	0.608	1.30387	1.377	1.36514	1.5078	1.475	1.496	1.72896	1.956	1.671	2.44444	2.3686	2.208	2.158	2.555	2.259	2.64268	2.413	2.375	2.8661	2.81937	2.752	3.439	3.685	2.756	3.258	2.95167	3.791	4.105	3.25283	3.64111	3.502	3.9	3.29	4.111	4.244	4.66723	3.07444	4.95311	4.533	5.17777	5.737	6.708	6.567
Ratio !0/rest	1.08258	1.08612	1.05313	1.84823	0.970322	0.590707	1.00426	0.992092	0.980554	1.09139	1.03682	1.03096	1.20296	1.02915	0.853744	1.15092	1.08383	0.972191	0.893494	1.06074	0.91045	1.05932	0.946805	0.89158	1.0536	0.98716	0.917297	1.1482	1.18027	0.854509	1.01612	0.90133	1.08553	1.16407	0.893127	0.963518	0.899211	0.980742	0.782658	0.942272	1.00672	1.06309	0.644884	1.07609	0.958616	1.04393	1.04237	1.05576	0.986265
Overall advantage	1.01
25/53 <1.0
[truncated: 12 more columns]

[truncated: 20 more sheets: Leaf FW 2007+F-W plots, Leaf FW 2008+F-W plots, Leaf FW 2009+F-W plots, Leaf length 7-9+F-W plots, Leaf length 2007+F-W plots, Leaf length 2008+F-W plots, Leaf length 2009+F-W plots, Leaf area 7-9+F-W plots, Leaf area 2007+F-W plots, Leaf area 2008+F-W plots, Leaf area 2009+F-W plots, ELWLW mean data+ANOVA correct, ELWLA mean data+ANOVA correct, Leaf length mean data+ANOVA cor, Leaf area mean data+ANOVA corr, 2+7g per plant t-tests, ELWLW mean data+ANOVA+CSDH6, ELWLA mean data+ANOVA+CSDH6, Leaf length mean data+ANOVA+DH6, Leaf area mean data+ANOVA+CSDH6]
