# Supplementary material for: Genetic analysis of water loss of excised leaves associated with drought tolerance in wheat
Source: PeerJ. 2018 Jul 6;6:e5063. doi: 10.7717/peerj.5063 (PMC6037134; doi:10.7717/peerj.5063)
Supplement: Table S2 [file peerj-06-5063-s003.xls]

## Sheet: Sheet1
	From CSDH_07-09 all data for PeerJ			From CSDH_07-09 all data for PeerJ			From CSDH_07-09 all data for PeerJ			From CSDH_07-09 all data for PeerJ			From CSDH_07-09 all data for PeerJ			From CSDH_07-09 all data for PeerJ			From CSDH_07-09 all data for PeerJ			From CSDH_07-09 all data for PeerJ
	Mean 2007	Mean08	Mean 2009	Mean 0-3h 2007	Mean 0-3h 08	Mean 0-3h 2009	Mean 2007	Mean 2008	Mean 2009	Mean 2007	Mean 2008	Mean 2009	Mean 2007	Mean08	Mean 09	Mean 2007	Mean08	Mean 3-6h 2009	Mean 2007	Mean 2008	Mean 2009	Mean 2007	Mean 2008	Mean 2009
CSDH	%ELWL0-3h	%ELWL0-3h	%ELWL 0-3h	3h loss/cm2/h	3h loss/cm2/h	wt loss/sq cm/h	%ELWLFW 0-3h	%ELWLFW 0-3h	%ELWLFW 0-3h	%ELWLDW 0-3h	%ELWLDW 0-3h	%ELWLDW 0-3h	%ELWL 3-6h	%ELWL 3-6h	%ELWL 3-6h	3-6h loss/cm2/h	3-6h loss/cm2/h	wt loss/sq cm/h	ELWLF 3-6h	ELWLF 3-6h	ELWLF 3-6h	ELWLD 3-6h	ELWLD 3-6h	ELWLD 3-6h
1	45.2603	57.711	43.2471	2.38338	3.52969	2.74173	39.682	49.9286	36.9759	322.677	372.014	257.365	19.6034	40.3329	23.469	0.562736	1.01931	0.837434	9.37506	14.405	11.3371	76.2632	107.857	78.9746
2	43.6133	59.2827	43.3004	2.29476	3.55171	2.64693	38.7184	51.5419	36.8347	345.354	394.856	248.255	51.6325	51.383	45.3909	1.53276	1.23415	1.53311	25.8396	17.9789	21.3413	229.969	137.861	140.798
3	47.3709	78.4565	61.7164	2.89883	5.48299	4.14579	42.1045	69.3233	54.0018	380.861	595.833	432.082	67.2676	94.4499	92.5075	2.22311	1.42707	2.36744	31.756	18.0512	30.8357	288.622	155.317	245.835
4	36.4655	66.0547	57.2018	2.1973	3.81662	3.80206	29.1197	54.9283	50.6361	243.163	404.265	442.239	17.3815	36.7783	70.1352	0.652901	0.777393	1.93887	10.2729	11.5416	26.0241	84.6859	84.3791	226.547
5	41.4806	69.0039	53.3113	2.01421	4.39731	3.03463	36.6132	59.8787	46.3693	312.184	453.15	356.593	35.0369	74.3619	62.0545	0.994695	1.41223	1.64603	18.1199	19.1494	25.0234	154.924	145.516	192.746
7	35.4716	57.1823	44.3055	1.73458	3.33839	2.85145	31.1464	47.7183	38.6141	256.579	304.424	300.741	21.6269	45.8684	28.0166	0.679915	1.09398	1.00039	12.2497	15.5361	13.5642	100.731	96.7877	105.581
8	49.047	68.7043	55.4823	2.21278	3.8508	2.53886	42.2093	59.5297	46.8388	303.333	469.083	300.769	31.1455	74.406	65.5173	0.706761	1.1043	1.18807	13.5465	17.2281	20.6168	97.1833	138.36	130.769
9	42.7908	58.297	47.4212	1.91212	3.63182	2.4962	37.0775	50.4986	40.7319	278.093	378.959	290.062	26.5887	40.4734	37.8675	0.67756	1.04921	1.01414	13.1726	14.5826	16.5781	99.053	108.707	117.799
10	45.9419	67.8884	49.6283	2.44346	4.40971	2.78194	40.06	59.3332	43.7224	320.642	471.143	369.207	75.5272	84.6439	75.8296	2.18599	1.73616	2.13004	35.5687	23.3264	33.5637	273.584	185.656	282.825
11	58.7217	56.0044	55.031	3.30088	3.79167	3.40445	51.4615	48.7554	47.8069	417.078	377.656	365.341	48.4079	38.8976	59.5152	1.1058	1.13427	1.66717	17.2692	14.5177	23.2438	139.839	111.587	179.119
12	43.5729	66.3289	47.335	2.34999	3.8148	3.37799	37.9586	57.0204	40.9088	295.06	407.828	301.674	16.6814	58.8483	24.2414	0.508739	1.07581	0.895392	8.15431	15.9606	11.033	63.8239	114.327	81.0516
13	63.3138	73.2871	56.7094	3.25562	4.88255	3.23732	55.7846	63.551	49.0518	470.215	479.525	363.27	78.2021	76.9745	62.307	1.47063	1.35313	1.52591	25.1814	17.5767	23.3286	212.722	133.081	172.645
14	59.5433	51.3834	55.745	3.11526	3.31801	3.65559	52.1838	44.8805	48.4681	422.481	355.13	371.311	68.3964	46.0066	70.7821	1.45126	1.40479	1.93714	24.3763	19.0617	25.3661	197.986	150.362	194.04
15	59.563	61.8253	48.5675	3.32675	3.71057	3.19931	52.1424	53.5491	42.7945	419.143	402.48	363.688	77.1854	68.5276	51.217	1.73059	1.54241	1.77583	27.1771	22.2146	23.0289	218.176	166.639	200.253
16	59.4675	70.9035	39.4781	2.93649	4.2332	2.13675	51.0578	61.6341	33.7152	361.439	471.469	231.414	71.4521	79.9382	41.9869	1.41642	1.38495	1.34905	24.6627	20.2062	21.297	174.638	154.633	147.153
17	52.9223	75.224	82.3191	2.46538	4.5302	3.68544	40.7501	63.3715	70.5951	290.238	459.885	496.215	41.7818	83.5737	93.5458	1.01969	1.34818	0.758937	18.1452	18.2867	14.5629	129.053	131.53	102.844
18	66.1187	66.4344	58.9316	3.71377	4.19559	3.56601	58.3552	57.5378	50.959	497.016	429.874	376.684	85.0118	73.8562	85.9939	1.58999	1.52824	2.1061	24.7665	20.8313	30.1348	211.537	155.933	222.757
19	52.1599	70.832	43.8264	2.97233	4.71394	2.99904	46.1788	63.3458	38.4033	402.778	601.683	310.652	51.2668	75.333	30.6578	1.40052	1.40652	1.15347	21.7906	18.7043	14.8335	190.389	179.146	120.35
20	55.4703	64.4288	44.7227	2.80748	3.52867	2.36947	48.9604	55.4654	38.762	417.208	401.105	290.831	34.2623	64.1274	34.5149	0.759395	1.23463	0.99386	13.2638	19.5369	16.2358	113.105	140.547	121.796
21	66.6311	83.5582	55.2536	3.07768	5.10923	3.23315	58.3376	73.0213	47.4917	469.304	579.661	338.293	89.3994	87.3686	89.8662	1.38217	0.876511	2.35293	26.2486	12.5374	34.3597	212.57	99.5685	244.827
22	58.4015	61.6547	44.0474	3.68718	4.27106	2.97726	51.9246	54.2271	38.5884	468.582	450.78	313.082	73.026	65.862	44.3894	1.81835	1.74794	1.5451	25.6597	22.1398	20.5437	231.965	183.96	163.862
23	51.8328	64.4915	47.1226	2.28521	3.3542	2.27842	44.7485	55.3345	40.493	327.78	389.763	288.077	53.1295	64.757	58.6321	1.12327	1.21604	1.43275	21.9368	19.7753	25.8652	160.435	139.374	184.658
24	48.9528	57.4952	46.3171	2.67329	3.50594	2.91431	42.6642	49.9745	39.9559	332.632	382.176	291.049	39.1279	50.0543	44.7191	1.06363	1.29494	1.48959	17.0129	18.4726	20.1975	132.448	141.361	147.213
25	48.7473	57.7705	52.0573	3.08938	3.89262	3.64342	43.9096	52.7153	45.8343	442.457	690.139	385.988	30.7337	46.0643	42.885	0.993629	1.20811	1.38605	14.1864	16.0692	17.5146	142.96	190.548	146.298
26	40.1676	56.8996	44.5497	2.44068	2.62677	2.99595	35.8458	47.6119	39.0761	333.414	304.325	318.768	22.4066	42.7041	34.0048	0.80997	0.779965	1.20454	11.9431	14.2985	15.6909	111.002	90.4755	127.13
27	51.7679	62.8636	59.0999	2.87054	3.71452	3.60334	45.0846	53.7298	50.3339	350.356	370.958	339.841	70.4905	70.7413	91.998	1.86881	1.51263	2.30848	29.5685	22.0099	31.7182	228.256	151.779	214.755
28	48.6319	52.5179	50.9638	2.59322	3.33304	2.85063	42.9159	45.7758	44.297	365.187	357.39	340.259	34.5428	38.5195	49.2017	0.938907	1.16098	1.3001	15.5209	15.9597	20.2394	132.124	124.968	154.44
29	54.5778	62.8238	65.6985	2.982	3.59814	3.84446	48.6631	54.9778	57.1221	450.694	441.22	440.396	70.0072	71.4013	88.1975	1.7153	1.47301	1.84607	28.0041	22.3383	27.047	258.333	178.091	217.119
30	52.7654	48.7029	50.1125	2.40716	3.3915	2.71276	46.3644	42.8769	43.1385	382.54	373.016	309.979	44.769	34.8188	40.3552	0.953573	1.20735	1.08075	18.4912	15.3217	17.1878	152.91	132.593	123.513
31	55.5889	44.6414	49.9561	2.95429	2.81269	3.21359	49.4583	38.979	43.8026	449.495	313.455	355.819	61.4823	28.9324	42.4352	1.44898	0.976017	1.29613	24.2609	13.7497	17.6748	220.028	107.24	143.297
32	76.6158	68.6606	51.0462	4.27456	6.37481	3.00712	68.7995	62.7678	44.5473	674.603	815.196	350.443	73.9653	67.2852	83.6115	0.95888	1.76837	2.41369	15.3634	19.3195	35.7221	150.794	218.321	282.068
33	59.0999	57.1787	53.5314	3.04582	3.73912	3.3135	52.0483	49.8867	46.2672	436.359	392.419	342.045	81.8296	54.1836	57.5329	1.71343	1.51417	1.60781	29.5055	19.94	22.9781	247.744	158.1	169.733
34	68.9668	63.9674	54.5896	3.82591	4.21998	3.04745	60.4171	55.235	47.282	487.476	404.673	353.775	84.0071	67.7308	83.2135	1.44063	1.58734	2.17493	22.7971	20.8189	33.1117	183.767	152.649	248.909
35	61.9067	62.8173	46.825	3.15495	3.78312	2.569	53.3631	54.1563	39.7053	387.487	392.793	261.259	69.3105	54.2191	41.4719	1.29258	1.20933	1.16179	21.943	17.2763	17.9686	160.191	125.225	118.296
36	68.4724	67.0309	51.6355	3.79333	4.96693	3.02411	60.1905	58.6472	44.7643	499.223	470.188	336.574	84.7664	72.8911	59.335	1.42114	1.76884	1.67925	23.0355	20.6607	24.745	189.708	166.763	185.536
37	81.5546	69.2434	44.0616	4.18197	4.38028	2.25427	70.3853	60.2248	37.6685	515.957	462.588	261.341	92.1429	75.6386	39.4979	0.869271	1.4357	1.0492	14.6	19.8206	17.7032	107.839	152.103	121.711
38	79.1667	72.5756	67.5533	3.60775	4.05309	3.53382	64.5524	58.518	58.2861	544.259	379.612	427.529	82.684	85.4394	87.277	1.02279	1.45335	1.38701	20.0454	22.0415	23.3737	164.074	144.085	176.608
39	70.6677	61.7515	50.075	3.5421	4.03038	3.02782	61.8076	53.6822	42.973	501.216	410.96	303.983	80.4313	66.4749	58.1728	1.23807	1.63103	1.68076	21.3938	21.7187	23.8796	181.052	166.38	168.113
40	71.2455	73.1717	46.1687	3.46867	4.51708	2.4282	62.1159	63.259	39.6363	485.356	471.059	280.476	75.9903	77.1956	38.3937	1.05755	1.28733	1.0207	18.7746	17.9178	16.7701	145.636	134.062	118.473
41	52.6628	62.3244	37.0569	3.63852	5.95356	2.49693	46.8558	55.2819	31.953	426.973	489.698	237.922	32.172	51.829	24.7781	1.04546	1.8173	1.02859	13.5083	16.7914	13.4173	122.427	148.571	101.154
42	89.845	55.8373	66.3876	5.58617	3.78433	4.81809	79.8374	48.3189	56.9498	716.886	359.491	405.07	71.4504	74.8863	92.7778	0.472314	2.23417	2.42077	6.79675	28.4293	25.8703	61.1842	211.991	178.664
43	81.8578	41.9482	40.2307	3.62098	2.51564	1.99043	72.4385	36.7948	34.9246	630.152	300.8	266.044	65.8392	34.3377	37.9042	0.629833	1.18862	1.17037	12.2299	17.398	19.7286	107.576	142.555	149.214
44	85.4701	58.5118	47.7249	4.379	3.65659	2.35829	74.0741	51.5842	41.2099	555.556	438.03	303.592	94.1176	58.3702	59.3584	0.728597	1.39541	1.45291	11.8519	19.4128	25.4744	88.8889	167.159	185.807
45	56.1572	51.8204	50.8344	3.22408	3.43278	2.83451	49.7714	46.1449	44.2956	439.234	422.623	344.84	47.2638	40.8548	47.1664	1.12772	1.30082	1.28071	17.5234	17.5321	20.037	154.061	160.689	155.399
46	49.3473	53.4853	43.633	2.68432	3.25222	2.67689	43.9803	46.9262	37.9847	404.632	383.26	293.715	31.8461	41.8243	34.6926	0.868786	1.16607	1.16411	14.2206	16.7853	16.7333	130.877	137.432	128.874
47	67.422	57.1748	47.5574	3.43167	3.66837	3.05731	60.2417	50.0902	42.0833	573.016	404.529	365.926	89.6108	57.2658	49.0604	1.46876	1.57522	1.59913	25.7587	21.4883	21.7758	238.095	173.737	188.519
48	58.1194	50.1082	52.0304	2.8048	3.33581	2.7523	51.9122	43.9524	44.8994	507.648	359.281	327.668	55.102	43.818	58.7434	1.10967	1.42738	1.45685	20.5352	18.8202	23.9192	200.707	153.281	174.359
49	56.3715	45.3764	57.4148	2.81023	3.08236	3.07662	47.9198	39.8057	49.8254	322.336	325.538	382.955	47.9748	41.087	49.8621	1.03855	1.48672	1.06602	17.74	19.2332	17.3539	119.159	156.183	132.413
50	57.4996	68.7375	48.0055	3.58045	4.57256	3.04632	50.7307	59.7043	41.5505	432.155	454.796	309.843	65.9906	75.8626	72.5597	1.72524	1.5458	2.30594	24.6543	20.5836	32.1275	209.371	156.13	240.967
51	66.4319	63.4268	45.1612	3.55573	3.52236	2.77129	59.1658	54.4758	39.3121	541.754	395	303.543	93.5462	73.5988	64.9224	1.70659	1.48494	2.17279	27.7079	22.9853	30.5765	250.658	167.287	235.762
52	51.2492	63.3894	39.4063	2.57311	3.44945	2.21343	44.6337	53.9561	33.6121	346.571	362.724	229.807	44.6545	57.2987	33.9061	1.08815	1.11497	1.1207	18.8913	17.4242	17.065	146.381	117.266	117
53	45.3704	44.1593	47.6075	2.46368	2.38002	2.6845	39.4956	37.7116	40.8934	306.127	258.43	290.325	39.5966	27.489	45.9731	1.16514	0.818445	1.28041	18.6941	13.0025	19.2412	144.791	89.0646	137.576
54	47.3448	49.1014	37.179	2.64759	2.78842	2.7141	41.7429	42.3399	31.9706	353.098	307.498	229.84	54.278	35.2906	36.5364	1.59738	1.02082	1.50372	25.2282	15.4819	19.0157	212.913	112.494	133.936
55	72.9412	62.881	46.5174	4.49077	3.99904	2.85695	64.3395	55.2261	40.6068	545.891	454.105	320.622	82.1745	75.5808	61.8403	1.36073	1.7762	2.02205	19.8042	24.5475	28.8505	167.473	202.222	226.99
56	51.0219	52.6152	39.8417	2.6218	3.49175	2.31871	44.6739	46.4875	34.1775	359.776	399.889	240.658	39.6461	51.1504	32.4004	0.990069	1.58215	1.11165	16.9164	21.0505	16.0591	136.388	181.119	113.704
57	65.4482	62.0492	49.3622	3.57058	3.55232	2.82909	56.7026	53.5262	41.9151	424.352	389.783	278.441	83.3558	67.5129	87.4551	1.55071	1.40942	2.57937	24.8834	21.2457	37.6827	186.322	154.519	248.797
58	66.824	63.2233	58.5839	3.40661	4.34784	3.56423	58.9139	54.6474	51.0298	498.796	405.282	396.241	87.5845	75.4661	84.0067	1.4553	1.91748	2.10335	25.3979	23.9932	29.6853	211.376	177.653	229.919
59	53.6005	55.3575	53.5045	2.99801	3.89296	3.28788	46.7415	48.8676	46.4925	365.286	420.665	355.144	63.7011	52.8245	62.3971	1.63841	1.6299	1.68013	25.4845	20.4702	23.7705	199.377	175.96	181.506
60	52.4821	56.9918	40.5471	2.84641	3.39791	2.19166	45.774	49.6378	35.0034	365.812	384.933	256.023	55.4694	43.3491	26.9321	1.43128	1.11544	0.866435	22.865	16.234	13.8222	183.686	125.439	101.092
61	48.8367	56.5447	36.8885	3.00863	3.89371	2.47591	43.123	49.8825	32.0554	369.603	426.175	245.278	46.9944	44.7139	29.6483	1.47846	1.31146	1.25241	21.1487	16.7507	16.2371	180.45	142.885	123.948
62	49.7755	60.5706	45.8271	2.34486	3.68759	2.33578	44.5992	52.968	39.5949	455.682	424.242	292.123	37.2447	50.108	38.9786	0.871404	1.21494	1.08133	16.5513	17.2917	18.2207	167.664	139.596	134.715
63	59.8234	63.1549	63.4499	3.12821	3.72304	3.35015	51.9522	53.9196	53.9948	395.556	369.011	363.313	79.2887	57.0509	85.975	1.63794	1.21634	1.64486	27.0373	17.5908	26.0115	206.627	120.555	178.58
64	58.1183	53.7524	48.7239	2.57276	3.02665	2.93761	50.7149	46.7868	41.5256	398.586	364.863	281.158	47.2676	35.4118	42.0561	0.871408	0.897993	1.28041	17.2347	13.8825	17.9155	135.833	108.273	121
65	60.2098	61.8826	62.9267	3.62279	3.78799	3.42704	54.1424	54.8359	53.9294	538.614	481.682	378.898	48.8776	52.7023	66.412	1.13901	1.22532	1.35272	17.0114	17.7556	21.1604	169.468	156.006	149.89
66	68.3937	64.3818	47.5569	3.01312	3.93085	2.8604	66.6404	59.7534	40.9682	478.625	473.339	297.147	82.779	80.3975	41.0362	0.760412	1.5509	1.30328	14.7038	21.7299	18.3064	104.451	172.2	131.324
67	73.2586	57.9378	62.13	3.81008	3.53231	3.1982	63.5284	49.2574	53.6939	478.571	332.024	395.528	88.7311	66.7159	85.1587	1.2282	1.6939	1.6303	20.3339	23.6184	27.9673	152.513	158.506	206.281
69	52.0285	57.0096	56.3294	2.45716	3.53011	3.33392	45.8268	49.6437	48.8367	384.722	387.975	367.4	52.8945	57.1229	71.1255	1.15458	1.50712	1.70465	21.5645	21.2365	25.5276	180.952	164.98	190.164
70	71.5782	61.1345	69.1643	3.38215	3.52144	3.62165	61.7943	50.6081	58.4107	454.167	294.076	376.224	89.6713	78.3562	95.0974	1.21646	1.74789	1.59814	21.9325	25.1321	25.3154	163.69	146.167	165.897
71	52.8604	45.7956	54.8142	2.80684	2.69151	3.29913	46.5532	39.881	47.8775	390.208	308.973	378.788	41.3176	40.197	55.9199	1.02774	1.26323	1.49498	16.9847	18.6576	21.5137	142.439	144.312	169.623
72	66.0198	58.4724	58.6306	3.26868	4.3535	2.9624	57.3362	51.3621	49.6899	436.97	422.65	325.871	68.6077	51.2166	64.7272	1.13499	1.56806	1.31714	19.7638	18.4554	21.6525	149.697	152.081	141.822
80	76.7554	66.9948	77.1341	3.33287	4.01169	4.00933	66.6354	57.6663	66.3756	506.285	419.652	476.218	84.6525	93.4809	82.2563	0.816157	1.8261	1.00367	16.0506	26.2865	15.9492	122.168	189.413	115.73
86	56.3544	60.7983	67.6469	3.49816	4.01672	3.88637	49.6434	53.0644	58.7418	419.713	417.991	446.881	56.0419	69.3407	86.9634	1.50422	1.78853	1.59938	21.3105	23.6315	24.1197	180.015	186.486	184.429
87	65.9032	68.3853	59.4587	3.07804	3.97561	3.2018	57.7721	58.9331	50.7287	485.661	426.533	345.632	69.1185	65.3305	70.1683	1.02571	1.1732	1.47737	19.0488	17.7947	23.4904	162.751	129.201	160.27
88	79.953	62.6633	59.0272	3.47482	4.15728	2.78405	69.0493	53.3433	49.3954	506.502	359.298	305.334	96.1058	61.6583	64.2857	0.836098	1.51996	1.38643	16.1681	19.5891	24.4071	117.987	131.643	155.735
90	69.2266	66.2183	65.2281	3.03734	4.04536	3.53661	61.7718	57.6849	56.5397	575.595	448.697	427.527	81.2855	64.8304	74.6998	1.08077	1.26603	1.31595	21.9139	18.1185	21.3319	205.556	140.491	158.655
91	63.2152	56.2757	50.6317	3.22798	3.80004	2.71631	55.1131	48.6018	43.5742	430.437	356.719	315.165	82.9222	47.0049	65.7533	1.54841	1.38164	1.73614	26.3067	17.7127	27.6804	205.176	129.734	194.236
92	56.9306	61.544	48.9435	2.83697	4.08369	2.96431	50.4196	54.0002	42.397	442.349	441.068	318.219	57.9505	56.422	53.4188	1.20495	1.42951	1.67287	21.3481	18.8954	23.191	187.439	154.368	171.538
93	78.9335	63.8426	53.291	3.23825	5.20436	2.4754	68.857	55.8533	44.5769	539.387	451.755	273.863	80.5014	44.4511	38.0287	0.686014	1.23081	0.82117	14.5827	14.0962	14.8176	114.248	112.606	90.7351
94	72.7332	63.6867	44.9843	3.36146	4.4088	3.12194	63.6341	56.0709	38.751	525.866	468.997	280.615	76.641	54.2243	33.3762	1.0667	1.33326	1.2785	17.22	16.98	15.8116	145.551	142.011	115.131
96	69.7131	59.1037	49.1283	3.48565	4.00314	2.94226	60.837	52.0221	42.4397	479.66	434.709	311.942	80.8753	44.6563	33.0859	1.22855	1.22686	1.02342	21.3871	16.0171	14.5744	170.107	133.456	107.4
97	58.23	63.3214	52.4395	2.8887	3.66279	2.9316	51.5967	55.1768	45.4035	467.614	436.885	338.938	65.015	52.8655	55.984	1.33173	1.11031	1.47969	23.7171	16.8138	22.8482	217.424	132.046	170.769
98	59.9177	57.0582	36.9741	3.6301	3.50991	2.43657	52.395	50.2887	32.3078	421.416	426.91	256.056	51.2028	43.9504	27.7093	1.24341	1.1517	1.15853	17.9853	16.6243	15.1962	144.813	140.373	120.404
99	77.9109	50.2042	47.5706	3.99806	2.71288	2.68726	67.7034	43.5298	40.9651	517.907	327.579	300.24	75.5688	37.337	72.0673	0.82775	0.991206	2.06689	14.0984	15.9349	31.546	107.772	119.867	219.057
102	83.0128	70.2595	41.9745	4.40754	4.74144	3.11453	74.2583	62.7908	37.0163	704.643	592.838	313.612	85.1198	80.0559	29.4728	0.765106	1.57397	1.20609	13.0018	20.6125	14.9622	122.891	194.382	126.69
104	92.0488	56.9945	59.8392	5.03016	4.65258	3.41575	81.1599	50.4331	51.2359	687.82	439.64	359.81	80.0177	71.41	62.0559	0.313679	2.48806	1.55978	5.19103	26.999	23.0621	45.4023	235.411	169.695
105	90.4429	66.1195	59.5891	4.66398	4.05635	3.1514	79.1271	57.3738	51.7881	632.5	438.989	398.281	65.8333	89.5851	57.1175	0.364329	1.84996	0.896856	6.0127	26.2263	14.7335	47.7778	198.803	110.283
114	77.4123	62.7028	49.7674	4.84851	4.37503	3.11414	68.1122	55.2578	42.9347	567.396	465.612	316.855	90.9201	86.3514	65.0615	1.27722	2.24991	1.76179	18.1281	28.2836	24.2365	150.517	238.497	174.83
115	47.4357	59.1351	59.2271	2.74313	3.75657	3.72492	42.2315	52.1554	52.1777	386.562	441.975	452.077	23.9301	44.843	64.9215	0.724725	1.14627	1.59763	11.1511	15.9491	14.8047	101.956	135.133	140.377
124	71.0458	52.9618	45.4534	3.53004	3.62935	2.88022	62.5251	47.3077	39.7033	523.016	443.571	314.215	86.0447	47.636	33.8695	1.23593	1.5189	1.20102	21.8866	19.8242	16.3379	183.73	185.595	129.479
127	58.06	68.8933	55.6785	2.72195	3.71464	3.05629	50.7629	57.7494	47.1067	405.263	357.326	306.56	70.6113	68.9437	65.8401	1.3885	1.097	1.57078	25.9011	17.0578	24.1123	206.579	105.918	157.931
128	73.3142	56.1408	49.268	2.92197	2.7729	2.54164	63.5044	47.5076	41.5901	475.182	320.498	266.948	89.3693	55.2814	74.7862	0.938612	1.04227	1.97059	20.4616	19.2471	32.0978	154.559	119.031	206.224
143	59.7862	57.605	40.6304	3.86926	4.07762	2.77134	53.7617	51.2276	36.2152	533.857	466.019	333.287	78.6381	51.2939	35.8695	2.0376	1.5277	1.41814	28.33	19.1636	18.513	281.806	174.656	170.28
144	91.9551	75.9062	84.3358	4.80793	4.66503	5.36534	81.3772	66.7062	77.2244	708.206	550.487	664.186	88.8889	91.9613	96.3572	0.367511	1.4197	0.738464	6.47235	19.8229	10.7865	56.8095	162.511	93.9454
146	58.7381	60.8823	53.5341	3.08291	3.4964	2.91451	52.2162	53.2275	46.4257	470.342	423.64	350.816	58.4249	59.0526	72.0632	1.26718	1.31415	1.83192	21.4559	19.9922	28.8231	193.231	159.025	214.898
CS	50.1534	55.1959	45.3256	2.96829	3.48147	2.71343	44.6023	48.8089	38.7819	403.705	424.259	284.916	26.9435	44.9436	32.6389	0.797821	1.26601	1.05037	12.0615	17.737	15.0626	109.844	154.352	110.882
SQ	75.1176	65.8316	64.0914	3.53326	3.93154	3.49012	64.3363	54.7482	53.5927	448.928	325.502	327.437	101.075	81.1051	92.5277	1.18941	1.65578	1.81622	21.5761	22.9813	27.7232	151.072	136.541	168.333

## Sheet: Sheet4
		Mean 2007	Mean 2008	Mean 2009	Mean 0-3h 2007	Mean 0-3h 08	Mean 0-3h 2009	Mean 2007	Mean 2008	Mean 2009	Mean 2007	Mean 2008	Mean 2009	Mean 2007	Mean 2008	Mean 2009	Mean 2007	Mean 2008	Mean 2009	Mean 2007	Mean 2008	Mean 2009	Mean 2007	Mean 2008	Mean 2009
		ELWL 0-3h	ELWL 0-3h	ELWL 0-3h	wt loss/cm2/h	wt loss/cm2/h	wt loss/cm2/h	ELWLFW 0-3h	ELWLFW 0-3h	ELWLFW 0-3h	ELWLDW 0-3h	ELWLDW 0-3h	ELWLDW 0-3h	ELWL 3-6h	ELWL 3-6h	ELWL 3-6h	3-6h loss/cm2/h	3-6h loss/cm2/h	3-6h loss/cm2/h	ELWLF 3-6h	ELWLF 3-6h	ELWLF 3-6h	ELWLD 3-6h	ELWLD 3-6h	ELWLD 3-6h
Mean 2007	ELWL0-3h	1
Mean 2008	ELWL0-3h	0.167419	1
Mean 2009	ELWL0-3h	0.290455	0.318028	1
Mean 0-3h 2007	wt loss/cm2/h	0.861132	0.129881	0.193647	1
Mean 0-3h 08	wt loss/cm2/h	0.275505	0.729064	0.183164	0.355023	1
Mean 0-3h 2009	wt loss/cm2/h	0.178071	0.255571	0.800266	0.286251	0.213574	1
Mean 2007	ELWLFW 0-3h	0.994021	0.149798	0.25689	0.86817	0.277923	0.175269	1
Mean 2008	ELWLFW 0-3h	0.18619	0.986301	0.273743	0.171687	0.783145	0.245435	0.18131	1
Mean 2009	ELWLFW 0-3h	0.284269	0.318557	0.996216	0.205726	0.188382	0.827277	0.253409	0.278938	1
Mean 2007	ELWLDW 0-3h	0.893202	0.12404	0.213733	0.865569	0.322508	0.252931	0.917665	0.175421	0.227147	1
Mean 2008	ELWLDW 0-3h	0.174806	0.610147	0.062346	0.287802	0.791862	0.183481	0.199254	0.710938	0.0879589	0.334424	1
Mean 2009	ELWLDW 0-3h	0.198058	0.274243	0.875033	0.227557	0.193653	0.873039	0.182524	0.260047	0.912101	0.249817	0.201731	1
Mean 2007	ELWL 3-6h	0.780061	0.272772	0.233741	0.652814	0.293504	0.142262	0.779028	0.282954	0.224705	0.667673	0.146083	0.144942	1
Mean 2008	ELWL 3-6h	0.420183	0.812676	0.442056	0.403298	0.594426	0.37289	0.41178	0.806536	0.442282	0.349312	0.461735	0.386171	0.514146	1
Mean 2009	ELWL 3-6h	0.299778	0.355006	0.797228	0.275871	0.206077	0.643551	0.272345	0.311282	0.788545	0.231025	0.0855536	0.674444	0.438073	0.533308	1
Mean 2007	3-6h loss/cm2/h	-0.2552	0.100073	-0.104889	-0.0822104	0.103397	0.000994051	-0.248179	0.107464	-0.10123	-0.192949	0.0583338	-0.0444676	0.325657	0.146299	0.221882	1
Mean 2008	3-6h loss/cm2/h	0.521983	0.143824	0.259152	0.660353	0.463953	0.296317	0.532723	0.183649	0.25931	0.52982	0.248952	0.247351	0.493983	0.563361	0.329842	0.115266	1
Mean 2009	3-6h loss/cm2/h	0.0899179	0.132646	0.129735	0.239148	0.143178	0.283278	0.10108	0.133125	0.126731	0.147237	0.112808	0.138054	0.382281	0.269899	0.646612	0.50614	0.279028	1
Mean 2007	ELWLF 3-6h	-0.219704	0.120566	-0.0504461	-0.187444	0.0471365	-0.0473817	-0.218998	0.112224	-0.0570659	-0.201341	-0.0133468	-0.0588233	0.393277	0.153969	0.263637	0.954273	0.0384576	0.47697	1
Mean 2008	ELWLF 3-6h	0.519932	0.164243	0.319429	0.589644	0.197516	0.299385	0.524639	0.170113	0.316512	0.482765	0.07607	0.279626	0.537207	0.661884	0.437767	0.133266	0.892962	0.324313	0.100534	1
Mean 2009	ELWLF 3-6h	0.158019	0.169	0.191498	0.190271	0.122537	0.133291	0.154502	0.152362	0.175735	0.137246	0.0598139	0.110112	0.464851	0.305784	0.713985	0.474711	0.242482	0.926491	0.506195	0.324438	1
Mean 2007	ELWLD 3-6h	-0.233052	0.0986854	-0.0747012	-0.148217	0.0774983	0.000940062	-0.218123	0.106881	-0.0707171	-0.0980217	0.0771492	-0.0144932	0.342502	0.114408	0.219591	0.942634	0.0444992	0.476176	0.960664	0.0797455	0.46688	1
Mean 2008	ELWLD 3-6h	0.47875	0.108553	0.149905	0.649169	0.386626	0.251803	0.505755	0.190588	0.167175	0.58055	0.469265	0.247574	0.421031	0.511146	0.232314	0.113278	0.881401	0.260576	0.0180683	0.830723	0.202782	0.0773277	1
Mean 2009	ELWLD 3-6h	0.0966511	0.165646	0.173679	0.198419	0.161838	0.205204	0.100184	0.162906	0.178396	0.149413	0.150543	0.224083	0.411692	0.297675	0.674348	0.522945	0.268935	0.930622	0.516244	0.325353	0.95674	0.517028	0.277613	1
		P<0.05	P<0.01	P<0.001	P<0.0001
	92df	0.203	0.264	0.334	0.384
		-0.203	-0.264	-0.334	-0.384
