# Supplementary material for: Genetic analysis of water loss of excised leaves associated with drought tolerance in wheat
Source: PeerJ. 2018 Jul 6;6:e5063. doi: 10.7717/peerj.5063 (PMC6037134; doi:10.7717/peerj.5063)
Supplement: Table S3 [file peerj-06-5063-s004.xls]

## Sheet: Data
	Mean 07-09	Mean 2007-9	Mean 2007-9	Mean 07-09	Mean 07-09	Mean 07-09	Mean 07-09	Mean 07-09		Mean	Ratio	Yield/pl	Yield/pl
CSDH	ELWLW 0-3h	ELWLF 0-3h	ELWLD 0-3h	ELWLA 0-3h	ELWLW 0-6h	ELWLF 0-6h	ELWLD 0-6h	ELWLA 0-6h	Mn control yield	Yield/pl drought	Drought/control	at 2 g/plant	at 7 g/plant
1	48.7395	42.1955	317.352	2.88493	62.2685	53.9012	405.05	10.786	3.08588	1.7155	0.555919	1.92717	6.04726
2	48.7321	42.365	329.488	2.83114	73.724	64.0849	499.031	12.4621	3.14286	1.98833	0.632651	1.94366	8.43082
3	62.5146	55.1432	469.592	4.17587	92.9808	82.0242	699.517	18.0825	3.35025	1.74982	0.522294	1.98433	7.09216
4	53.2407	44.8947	363.222	3.41185	69.4594	60.8409	495.093	12.4553	2.97875	1.94318	0.652348	1.84789	6.70724
5	54.5986	47.6204	373.976	3.14872	78.3783	68.3846	538.371	13.1599	3.53011	2.25492	0.638767	2.22539	8.02617
6									3.68701			2.15944	10.3351
7	45.6532	39.1596	287.248	2.64147	61.7327	52.943	388.281	10.4354	3.24542	1.94964	0.600735	2.18203	7.17092
8	57.7445	49.5259	357.728	2.86748	77.7633	66.6564	479.832	11.2987	3.913	1.79508	0.458748	2.18521	7.52214
9	49.503	42.7693	315.705	2.68005	66.6217	57.5471	424.224	10.5014	3.78245	1.46642	0.387689	2.12799	7.80713
10	54.4862	47.7052	386.997	3.21171	89.7723	78.5248	634.352	15.2729	3.71254	1.90583	0.51335	2.30605	7.47518
11	56.5857	49.3412	386.691	3.499	77.6268	67.6848	530.207	14.0453	3.55426	1.77642	0.499799	1.96134	6.54683
12	52.4122	45.2959	334.854	3.18093	65.9741	57.0119	421.255	11.5877	3.73034	2.06689	0.554076	2.03021	8.18309
13	64.4368	56.1291	437.67	3.79183	89.7047	78.158	610.486	15.4303	3.56783	1.94467	0.545056	2.18091	7.69579
14	55.5572	48.5108	382.974	3.36295	81.8292	71.4455	563.77	14.5248	3.04006	1.544	0.507885	1.91414	6.67061
15	56.6519	49.4953	395.104	3.41221	84.2391	73.6355	590.126	14.8889	3.39872	1.8125	0.533289	2.02978	7.04164
16	56.6164	48.8024	354.774	3.10215	82.242	70.8577	513.582	13.0734	3.81376	1.80522	0.473345	1.87741	6.34149
17	70.1551	58.2389	415.446	3.56034	87.6767	75.2372	536.588	13.4082	3.4877	1.52967	0.438589	2.03415	6.87777
18	63.8282	55.6173	434.525	3.82512	92.81	80.8616	631.267	16.2756	3.68375	2.13242	0.578871	2.36306	7.26181
19	55.6061	49.3093	438.371	3.56177	76.4137	67.7521	601.666	14.2422	3.34925	1.94508	0.580752	2.09446	6.76284
20	54.8739	47.7292	369.715	2.90187	73.6983	64.0748	494.864	11.3731	3.76005	1.90083	0.505534	2.1747	8.41652
21	68.481	59.6169	462.419	3.80669	96.5715	83.9987	648.074	15.6299	3.16657	1.60942	0.508253	1.99988	7.10585
22	54.7012	48.2467	410.815	3.64517	80.545	71.0278	604.077	15.6036	3.60711	1.82627	0.506299	2.18705	8.47541
23	54.4823	46.8587	335.207	2.63928	80.6635	69.3844	496.696	11.383	3.55455	1.77442	0.499196	2.2297	7.76483
24	50.9217	44.1982	335.285	3.03118	72.3169	62.7592	475.626	12.6133	3.76121	2.23142	0.593272	2.3932	8.49543
25	52.8584	47.4864	506.195	3.54181	70.6656	63.4098	666.13	13.86	3.00331	1.66591	0.554691	1.70773	8.11588
26	47.2056	40.8446	318.836	2.6878	63.3426	54.8221	428.371	10.6018	3.25758	2.10218	0.645319	2.24688	7.33578
27	57.9105	49.7161	353.718	3.39613	90.2335	77.4816	551.982	15.495	3.09002	1.63633	0.529554	1.93407	5.93607
28	50.7045	44.3296	354.278	2.92563	70.4376	61.5695	491.456	11.8682	2.84869	1.67427	0.587735	1.89792	7.68854
29	61.0333	53.5877	444.104	3.47486	90.3349	79.3841	661.951	15.0833	3.09823	1.93118	0.623318	1.87151	7.42799
30	50.527	44.1266	355.178	2.83714	70.0002	61.1268	491.517	11.4469	3.00529	1.59008	0.529095	1.85522	6.74221
31	50.0621	44.08	372.923	2.99352	71.1473	62.6418	529.778	12.3866	3.51628	2.03755	0.57946	2.33251	8.03817
32	65.4409	58.7049	613.414	4.55216	91.9	82.1732	830.475	18.5355	3.43888	2.05608	0.597893	2.31419	7.31333
33	56.6033	49.4007	390.274	3.36615	84.2408	73.5419	582.133	14.5488	3.23745	2.20633	0.681503	2.23511	7.65289
34	62.5079	54.3114	415.308	3.69778	91.9527	79.8873	610.416	15.8703	2.56874	1.29725	0.505014	1.70932	4.79747
35	57.183	49.0749	347.18	3.16902	79.4047	68.1375	481.751	12.8077	2.42267	1.53017	0.631604	1.66176	5.70027
36	62.3796	54.534	435.328	3.92812	88.5055	77.3477	615.997	16.194	2.70244	1.36518	0.505166	1.67825	6.24519
37	64.9532	56.0929	413.296	3.60551	85.0965	73.4675	540.513	13.7527	2.96741	1.67992	0.566122	1.8642	6.55378
38	73.0985	60.4522	450.467	3.73155	95.3155	82.2724	612.056	14.1756	1.93678	1.38958	0.717471	1.41355	4.44408
39	60.8314	52.8209	405.386	3.53343	86.5399	75.1516	577.235	14.7486	3.32204	1.89958	0.571813	2.08862	6.6023
40	63.5286	55.0037	412.297	3.47132	84.1299	72.8245	545.02	13.3822	2.36514	1.43525	0.606835	1.55119	4.8893
41	50.6814	44.6969	384.865	4.02967	68.8844	59.2693	508.915	15.5013	2.32402	1.46392	0.629908	1.63736	4.74922
42	70.69	61.7021	493.816	4.72953	94.2941	82.0675	644.428	18.8513	2.23977	1.4514	0.648013	1.51237	4.09173
43	54.6789	48.0527	398.999	2.70902	73.4716	64.5048	532.113	10.8099	3.10571	1.56583	0.50418	2.1074	6.75028
44	63.9023	55.6227	432.392	3.00744	85.6361	74.5357	579.678	13.3225	3.36029	2.36056	0.702487	2.09335	6.95495
45	52.9373	46.7373	402.232	3.16379	73.7625	65.1015	558.949	12.9144	3.13238	1.93255	0.616958	1.99437	6.0418
46	48.8219	42.9637	360.536	2.87114	66.9262	58.8768	492.93	11.5058	3.74514	1.73133	0.462288	2.2316	7.6744
47	57.3847	50.8051	447.823	3.38578	83.4069	73.8127	647.941	14.4654	2.33686	1.54342	0.660467	1.7647	4.97572
48	53.4193	46.9214	398.199	2.9643	77.4804	68.0129	574.315	12.553	3.73968	1.758	0.470093	2.24659	7.85079
49	53.0542	45.8503	343.61	2.98974	74.001	63.9593	479.528	12.2367	2.349	1.40825	0.599512	1.60989	4.9442
50	58.0809	50.6619	398.931	3.73311	87.6648	76.4504	601.088	16.3369	2.8499	1.56108	0.547767	1.95498	6.13278
51	58.34	50.9846	413.432	3.28313	89.3512	78.0744	631.335	14.817	3.60806	1.72858	0.47909	2.17259	7.40132
52	51.3483	44.0673	313.034	2.74533	72.0689	61.8608	439.917	11.2434	3.34433	1.89892	0.567802	2.09323	7.07243
53	45.7124	39.3669	284.961	2.5094	65.4051	56.3461	408.771	10.5296	3.86065	1.88682	0.488731	2.12557	8.22284
54	44.5417	38.6845	296.812	2.7167	67.463	58.5931	449.927	11.9622	3.46126	1.81692	0.524929	2.1147	6.90293
55	60.7798	53.3908	440.206	3.78225	88.604	77.7915	639.101	16.0586	2.98336	1.711	0.573515	1.74065	7.61864
56	47.8263	41.7796	333.441	2.81075	68.4413	59.7883	477.178	11.7821	3.74625	1.86142	0.496875	2.18917	8.44528
57	58.9532	50.7147	364.192	3.31733	91.5453	78.6519	560.738	15.1037	3.56911	1.86217	0.521746	2.10598	6.70934
58	62.8771	54.8637	433.44	3.77289	93.122	81.2225	639.756	16.3668	3.91542	2.13633	0.54562	2.4277	8.41033
59	54.1542	47.3672	380.365	3.39295	80.7443	70.609	565.98	14.7366	2.35282	1.61942	0.688287	1.62304	5.5206
60	50.007	43.4717	335.589	2.81199	70.2918	61.1121	472.328	11.511	2.81164	1.9895	0.707593	2.03547	6.26249
61	47.4233	41.687	347.019	3.12608	67.9729	59.7325	496.113	13.0478	3.02747	1.43973	0.475555	1.88678	7.44954
62	52.0577	45.7207	390.682	2.78941	71.832	63.0752	538.007	11.2236	3.24096	1.74542	0.538549	1.99184	7.57086
63	62.1428	53.2889	375.96	3.40047	89.5332	76.8354	544.547	14.3273	3.33151	1.51017	0.453298	1.89492	6.92084
64	53.5315	46.3424	348.202	2.84567	72.439	62.6867	469.905	11.3034	3.48023	1.73608	0.498842	1.9898	7.48956
65	61.673	54.3025	466.398	3.61261	82.8763	72.945	624.852	14.1789	3.45855	2.05258	0.593481	2.00083	8.32895
66	60.1108	55.7873	416.371	3.26812	85.557	74.034	552.363	13.896	4.0823	2.01992	0.494798	2.17663	7.88909
67	64.4421	55.4933	402.041	3.51353	92.3164	79.4665	574.474	14.6982	3.43542	1.68817	0.491401	1.95456	6.39452
69	55.1225	48.1024	380.032	3.10706	81.2494	70.8786	558.731	13.3549	3.35568	1.936	0.576932	2.24767	6.96361
70	67.2923	56.9377	374.822	3.50841	95.67	81.0644	533.407	14.7082	3.16814	1.74758	0.551613	1.83559	6.2146
71	51.1568	44.7706	359.323	2.93249	72.9424	63.8226	511.447	12.2838	3.88267	1.86425	0.480147	2.10718	8.32596
72	61.0409	52.7961	395.163	3.52819	84.1534	72.7533	543.03	14.2076	2.71357	1.35508	0.499373	1.73956	5.47672
80	73.6281	63.5591	467.385	3.78463	96.1019	82.9879	609.822	14.6157	2.89092	1.4372	0.497142	1.82016	5.51955
86	61.5999	53.8165	428.195	3.80041	87.9392	76.8371	611.838	15.8777	3.23164	1.49558	0.462794	1.8803	5.76076
87	64.5824	55.8113	419.275	3.41848	87.8632	75.9226	570.016	13.5759	3.3668	1.73417	0.515078	2.02232	7.49571
88	67.2145	57.2627	390.378	3.47205	90.7184	77.3174	525.5	13.7745	3.53402	1.64533	0.465569	2.04921	7.11479
90	66.891	58.6655	483.94	3.53977	90.2318	79.1202	652.174	13.9194	4.0465	1.86508	0.460912	2.38511	9.13451
91	56.7075	49.0963	367.44	3.24811	84.3778	72.9963	543.822	14.0275	3.47062	1.74358	0.502383	2.20819	7.08087
92	55.806	48.939	400.545	3.29499	79.9618	70.0838	571.66	13.8248	2.86118	1.6635	0.581404	1.72312	6.4641
93	65.3557	56.429	421.668	3.63934	82.2145	70.9279	527.531	13.2576	3.56354	1.88967	0.530277	2.17151	6.96124
94	60.4681	52.8187	425.159	3.63073	79.5585	69.4892	559.39	14.9484	2.72915	1.17	0.428704	1.59784	6.17322
96	59.315	51.7663	408.77	3.47702	79.1631	69.0924	545.758	13.5274	3.18392	1.874	0.588583	2.03596	8.13503
97	57.997	50.7257	414.479	3.16103	82.1431	71.852	587.892	13.0589	3.29282	1.61483	0.49041	1.93167	6.0917
98	51.3167	44.9972	368.127	3.1922	70.2612	61.5991	503.324	12.7635	3.29084	2.02655	0.615813	2.04774	6.44967
99	58.5619	50.7328	381.909	3.13273	82.4284	71.2592	530.807	12.956	3.29254	1.62442	0.493363	1.89404	6.41777
102	65.0823	58.0218	537.031	4.08784	83.2744	74.2139	685.019	15.3668	3.48237	1.90118	0.545945	2.1259	8.4477
104	69.6275	60.9429	495.757	4.36616	90.62	79.3603	645.926	16.9798	3.53578	1.63455	0.462287	2.04853	6.48848
105	72.0505	62.763	489.923	3.95725	90.1082	78.4205	608.878	14.5623	3.3412	1.71736	0.513995	1.90472	6.87358
114	63.2942	55.4349	449.954	3.76654	90.2633	78.9843	637.902	15.5109	3.64587	2.0554	0.563762	2.1206	7.95706
115	55.2659	48.8549	426.871	3.40821	70.8335	62.6766	551.625	12.8074	3.45861	2.3088	0.667552	1.84346	7.41793
124	56.487	49.8454	426.934	3.34654	78.4056	69.195	593.202	13.6141	3.31873	1.78092	0.536626	2.01006	5.45841
127	60.8773	51.873	356.383	3.16429	87.0206	74.2301	513.193	13.206	3.00225	1.60936	0.536052	1.79208	6.60781
128	59.5743	50.8674	354.209	2.7455	87.844	74.8029	514.147	11.8928	3.50747	1.46475	0.417608	1.80292	8.0868
143	52.6739	47.0682	444.388	3.57274	77.2788	69.0704	653.302	15.5952	3.8046	2.19264	0.576312	2.25651	8.15996
144	85.0914	75.1026	640.96	4.9461	99.1151	87.4632	745.382	16.9309	2.2307	1.08458	0.486207	1.39339	4.4411
146	57.7182	50.6231	414.932	3.16461	84.4892	74.0469	603.984	13.5547	3.4749	1.87691	0.540134	2.23856	9.14242

## Sheet: Correlations
		Mean 2007-9	Mean 2007-9	Mean 2007-9	Mean 2007-9	Mean 2007-9	Mean 2007-9	Mean 2007-9	Mean 2007-9	Mean	Mean	Ratio	Yield/plant	Yield/plant
		ELWLW 0-3h	ELWLF 0-3h	ELWLD 0-3h	ELWLA 0-3h	ELWLW 0-6h	ELWLF 0-6h	ELWLD 0-6h	ELWLA 0-6h	Control yield	Yield/pl drought	Drought/control	at 2 g/plant	at 7 g/plant
Mean 2007-9	ELWLW 0-3h	1
Mean 2007-9	ELWLF 0-3h	0.991492	1
Mean 2007-9	ELWLD 0-3h	0.7607	0.819965	1
Mean 2007-9	ELWLA 0-3h	0.771658	0.805948	0.852336	1
Mean 2007-9	ELWLW 0-6h	0.874454	0.870341	0.637466	0.689329	1
Mean 2007-9	ELWLF 0-6h	0.871479	0.876576	0.694968	0.723705	0.995192	1
Mean 2007-9	ELWLD 0-6h	0.659279	0.719063	0.915815	0.79648	0.735429	0.795773	1
Mean 2007-9	ELWLA 0-6h	0.648678	0.688535	0.738687	0.905458	0.775021	0.809095	0.849361	1
Mean	Yield/pl control	-0.215627	-0.195189	-0.1729	-0.303545	-0.125463	-0.124327	-0.112503	-0.216646	1
Mean	Yield/pl drought	-0.318353	-0.290379	-0.132846	-0.241843	-0.242542	-0.221929	-0.0625922	-0.160383	0.614511	1
Ratio yield	Drought/control	-0.122667	-0.119952	0.0202231	0.0483601	-0.136512	-0.117768	0.0342671	0.0411518	-0.450174	0.415862	1
Yield/plant	at 7 g/plant	-0.30586	-0.28283	-0.183999	-0.317433	-0.170926	-0.159131	-0.0752689	-0.191843	0.845082	0.721622	-0.156215	1
Yield/plant	at 2 g/plant	-0.32657	-0.299968	-0.155417	-0.350693	-0.250077	-0.232847	-0.0918659	-0.279158	0.776376	0.617886	-0.211498	0.720826	1
		Mean 07-09	Mean 2007-9	Mean 2007-9	Mean 07-09	Mean 07-09	Mean 07-09	Mean 07-09	Mean 07-09
		ELWLW 0-3h	ELWLF 0-3h	ELWLD 0-3h	ELWLA 0-3h	ELWLW 0-6h	ELWLF 0-6h	ELWLD 0-6h	ELWLA 0-6h
Mean	Yield/pl control	-0.215627	-0.195189	-0.1729	-0.303545	-0.125463	-0.124327	-0.112503	-0.216646
Mean	Yield/pl drought	-0.318353	-0.290379	-0.132846	-0.241843	-0.242542	-0.221929	-0.0625922	-0.160383
Ratio yield	Drought/control	-0.122667	-0.119952	0.0202231	0.0483601	-0.136512	-0.117768	0.0342671	0.0411518
Yield/plant	at 7 g/plant	-0.32657	-0.299968	-0.155417	-0.350693	-0.250077	-0.232847	-0.0918659	-0.279158
Yield/plant	at 2 g/plant	-0.30586	-0.28283	-0.183999	-0.317433	-0.170926	-0.159131	-0.0752689	-0.191843
		P<0.05	P<0.01	P<0.001	P<0.0001
	92df	0.203	0.264	0.334	0.384
		-0.203	-0.264	-0.334	-0.384
